# Supplementary material for: Detection of TurboID fusion proteins by fluorescent streptavidin outcompetes antibody signals and visualises targets not accessible to antibodies
Source: eLife journal article supplement (doi:10.7554/elife.95028), 2024-04-03

Source data 1. Uncropped and labelled gels for Figure 5—figure supplement 1.

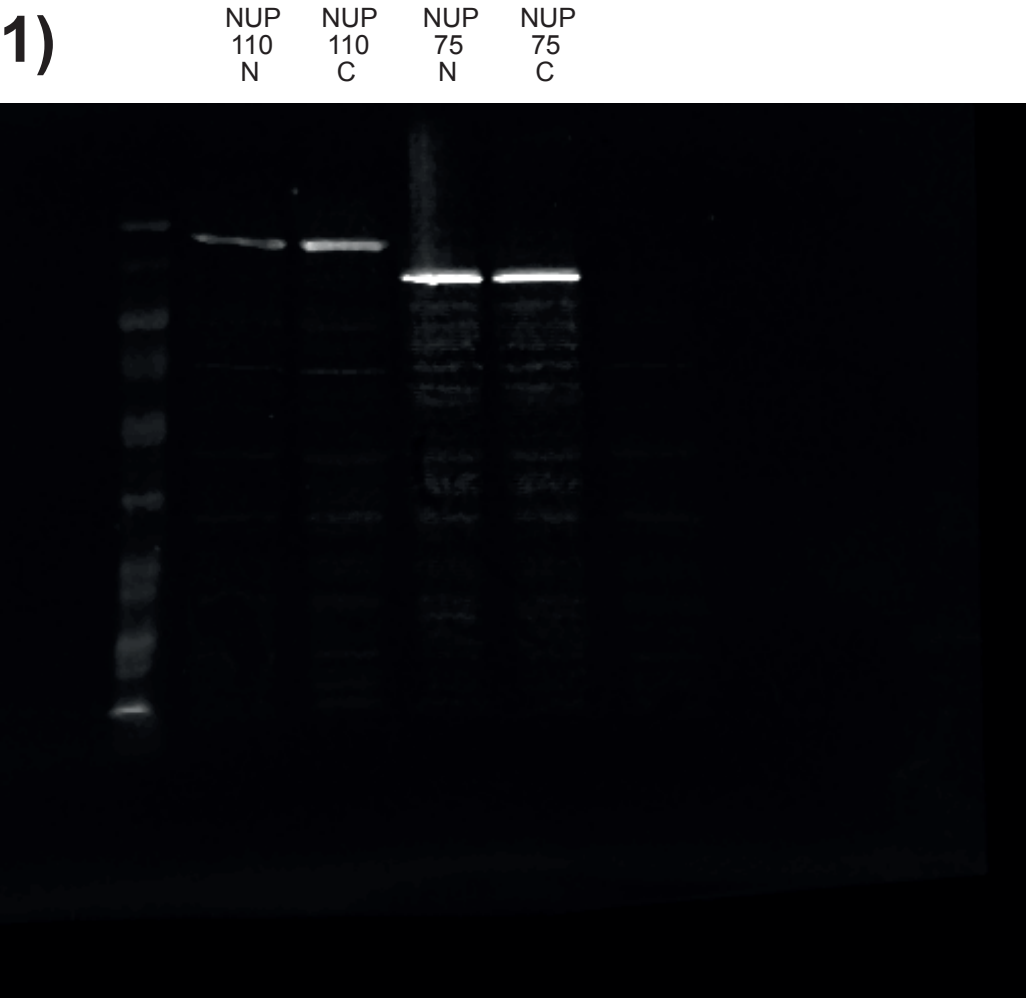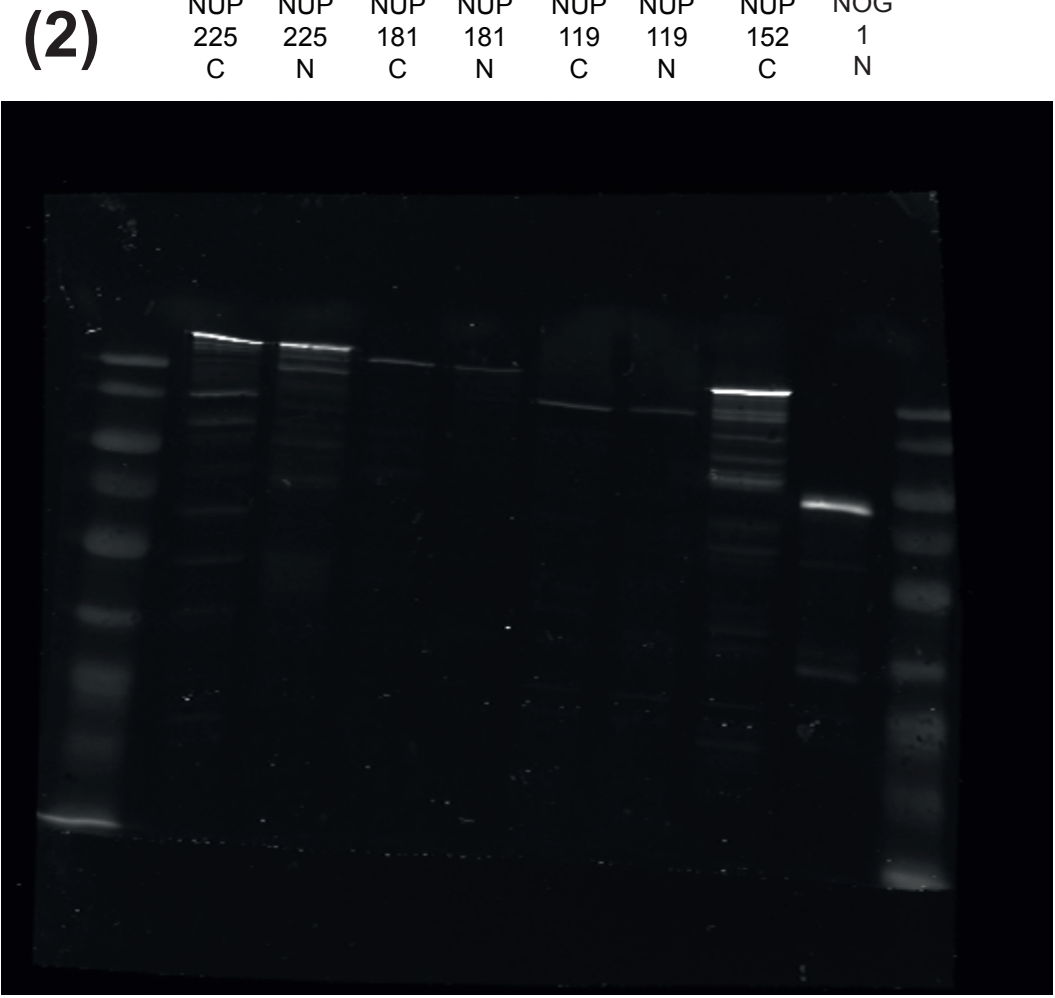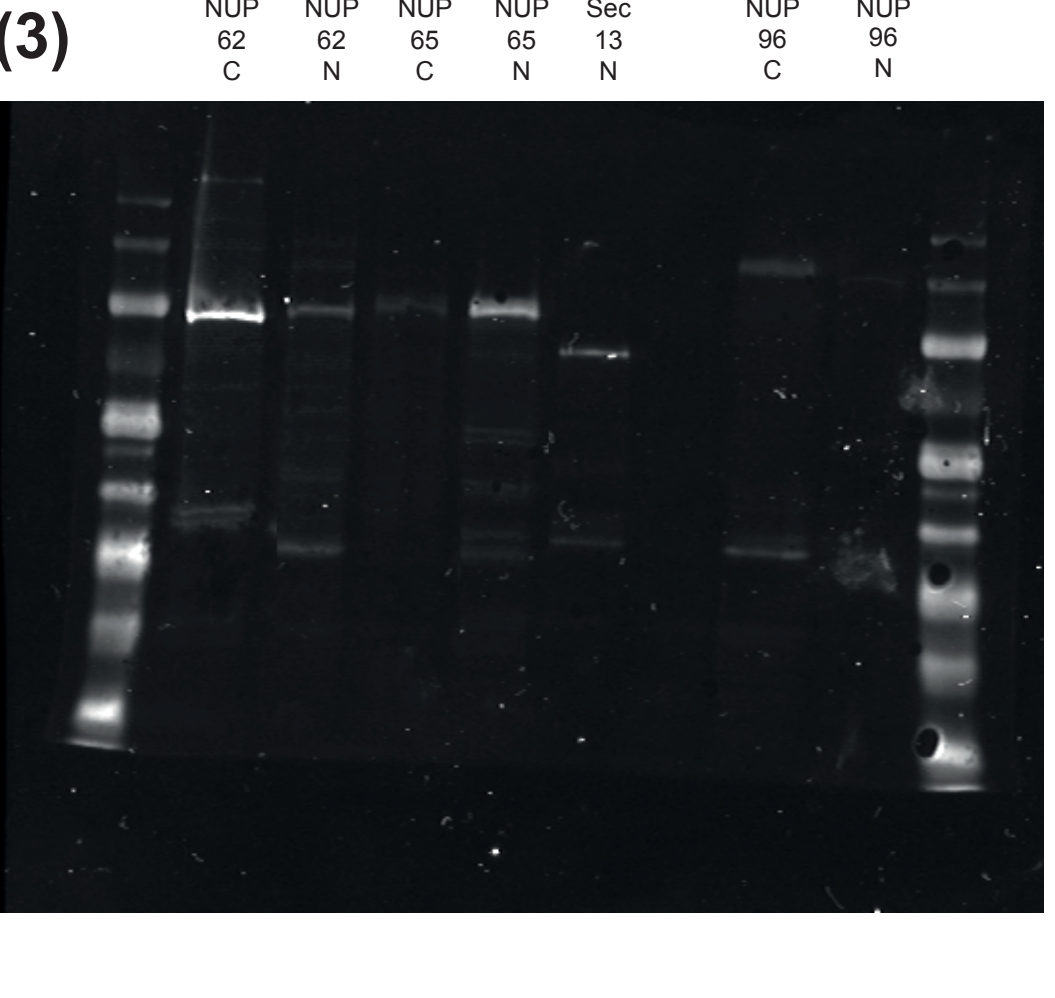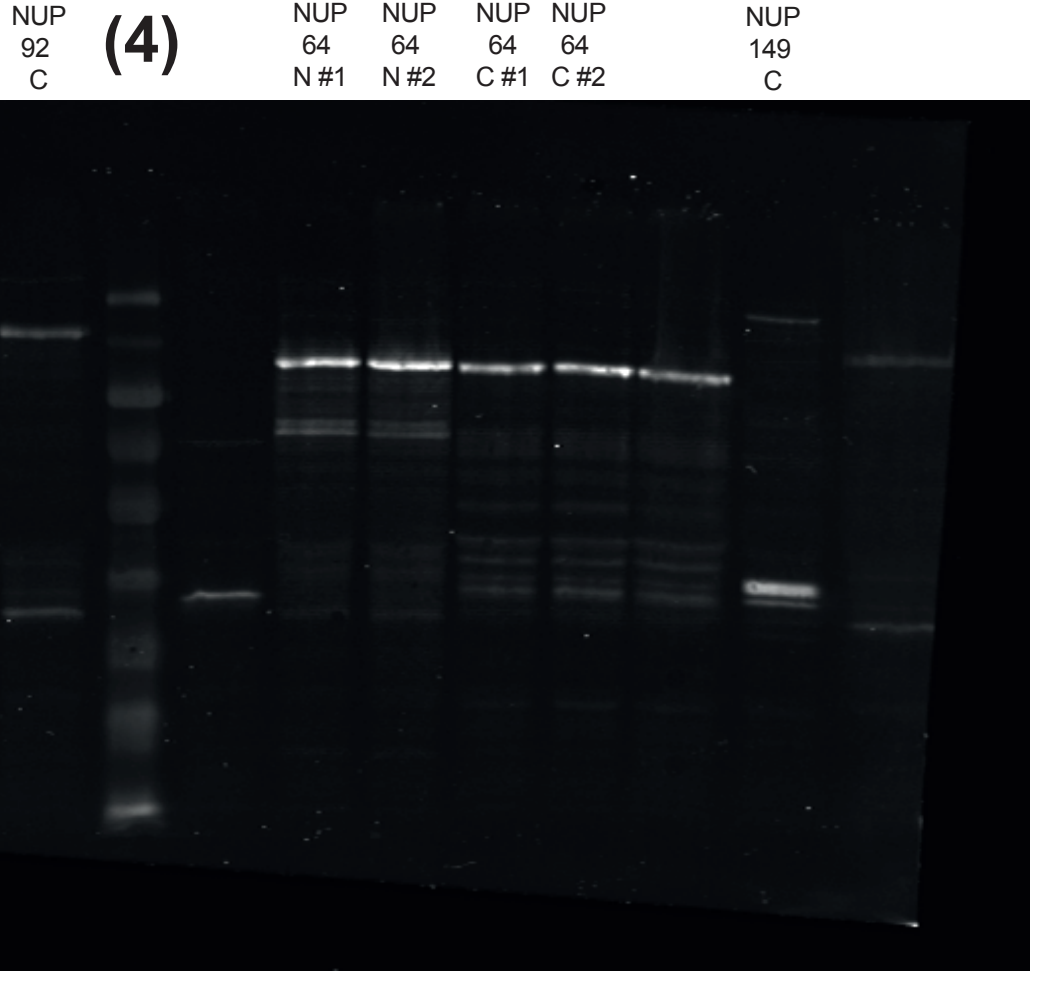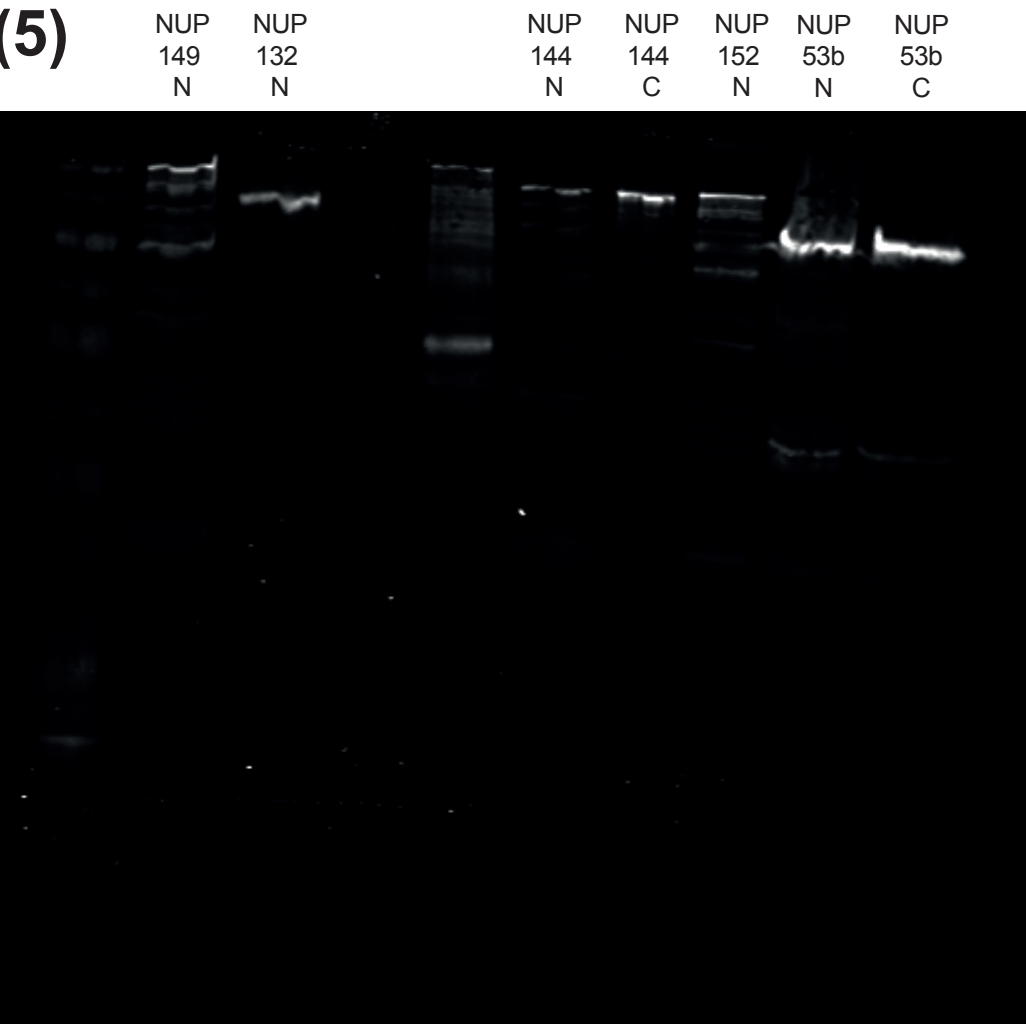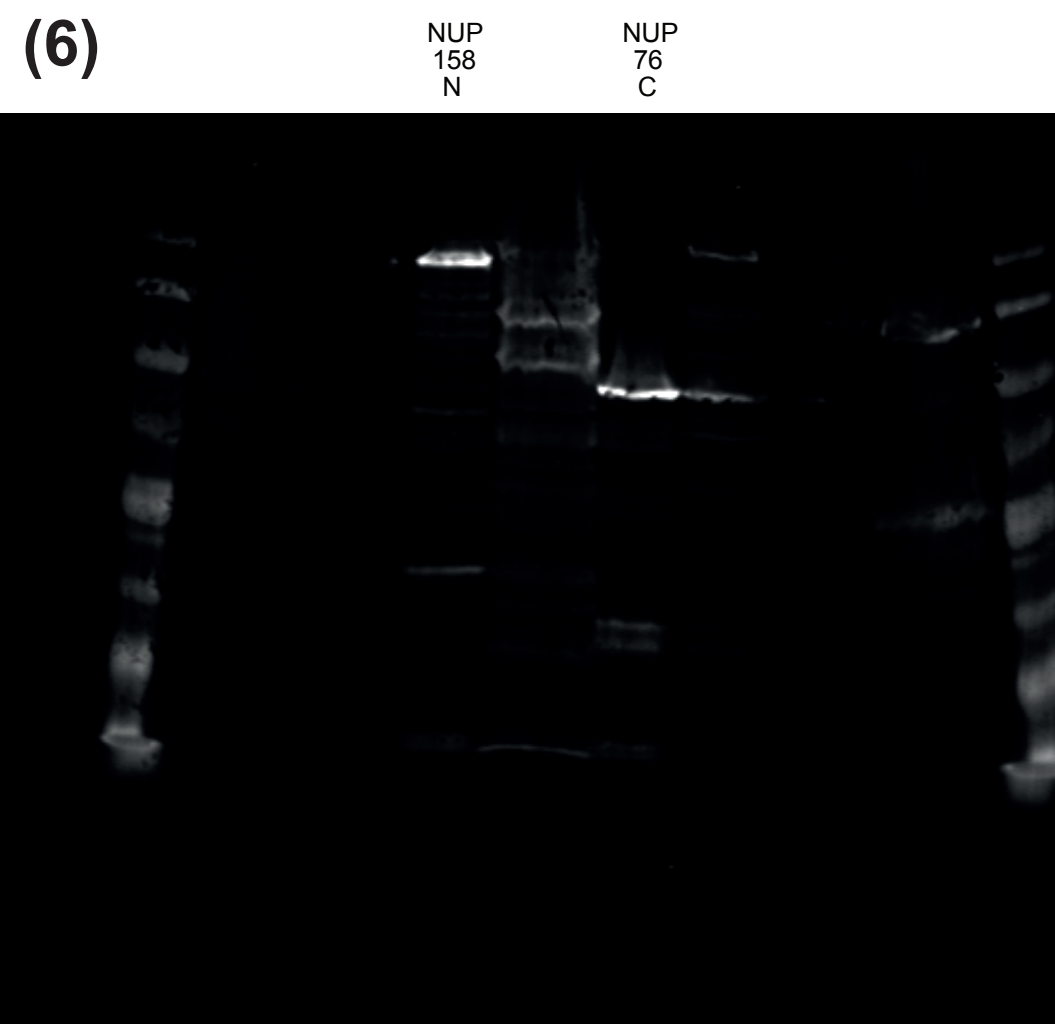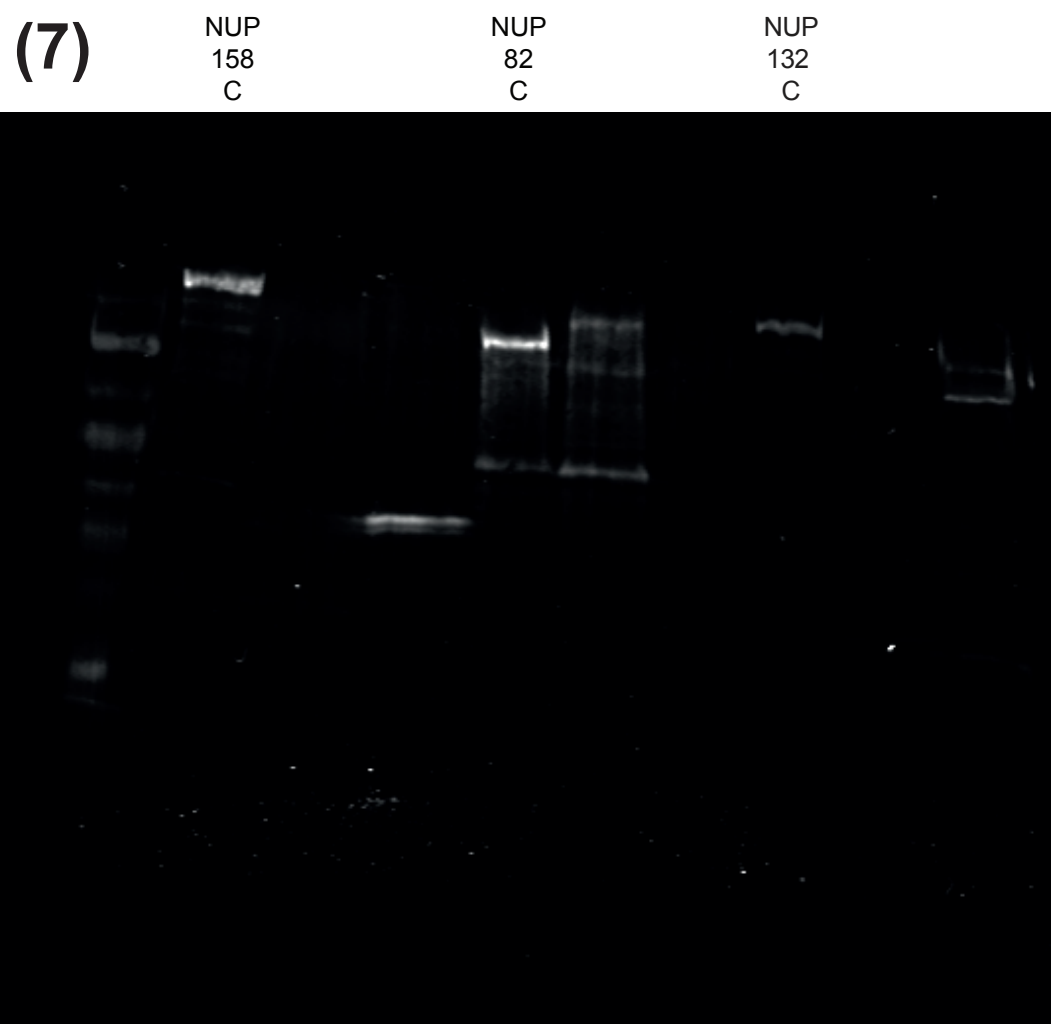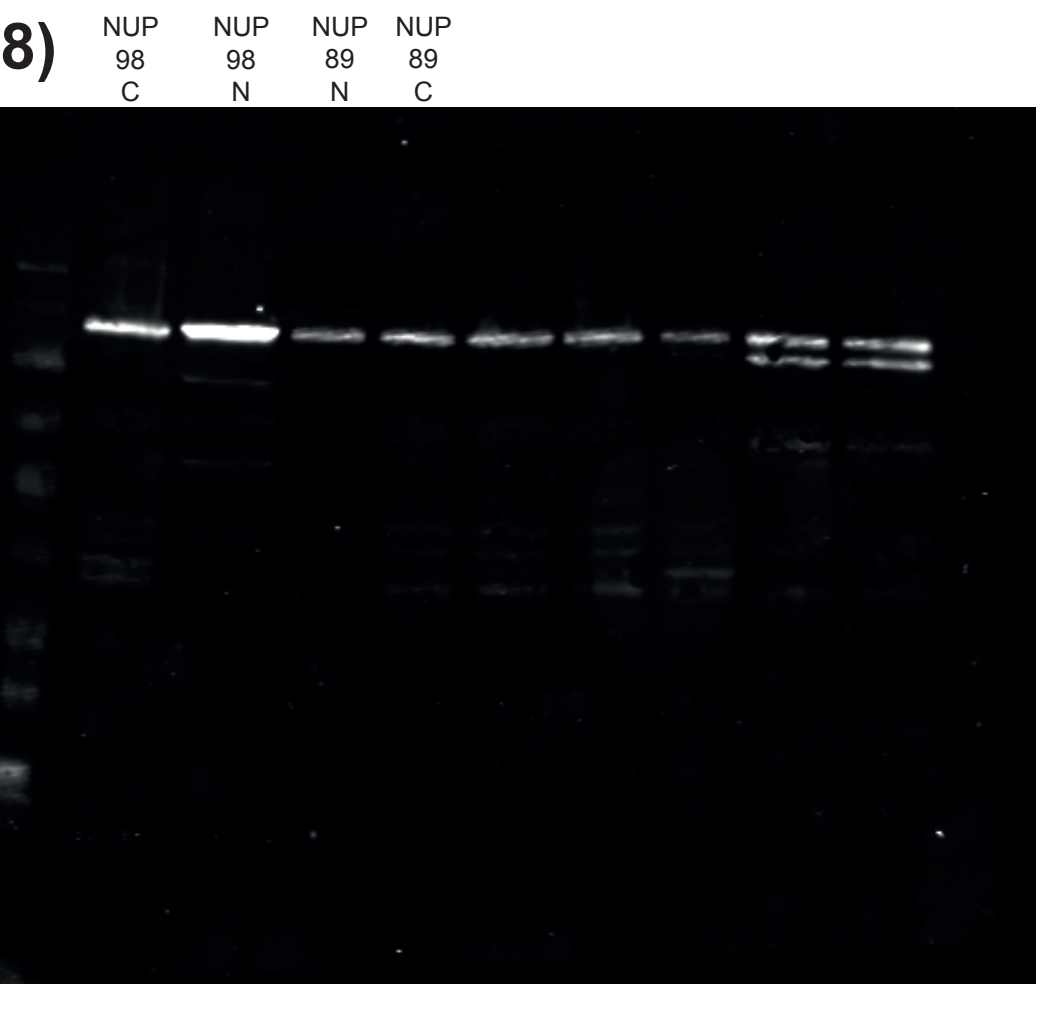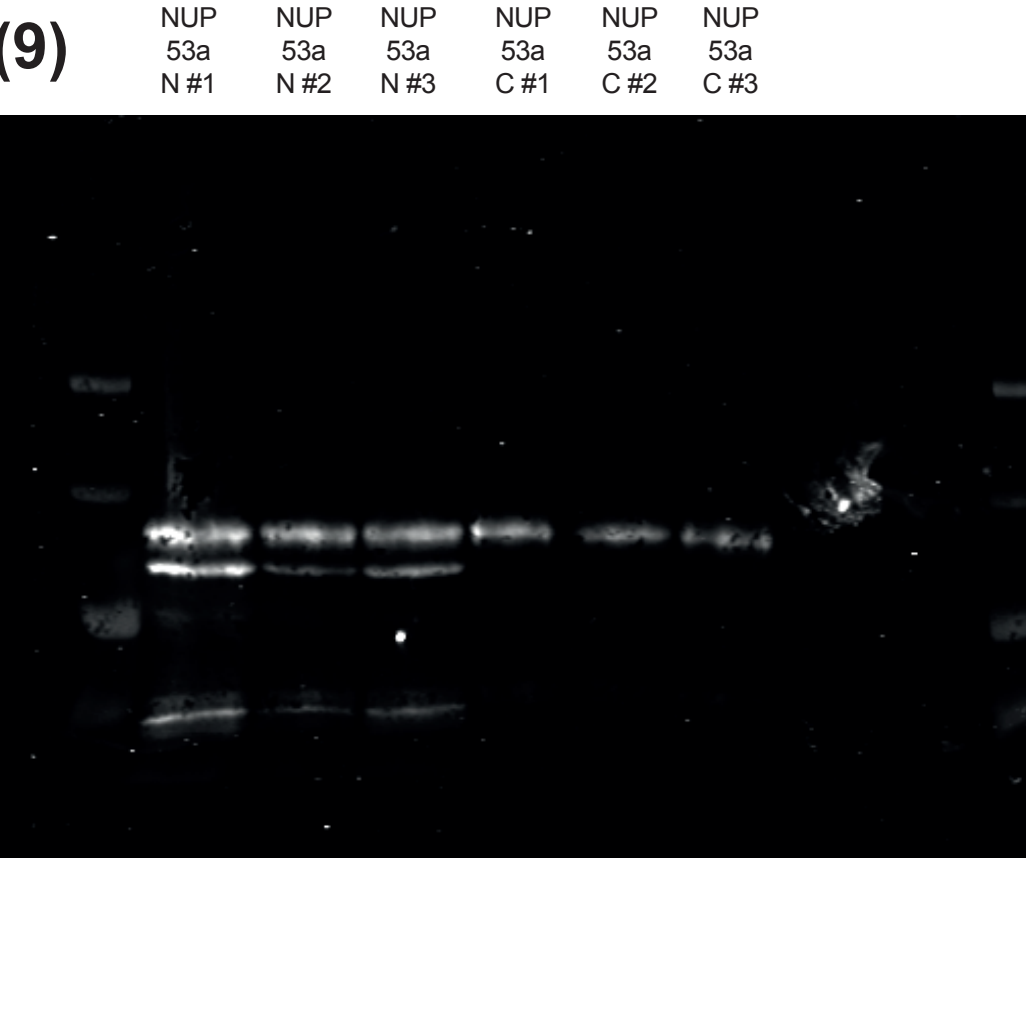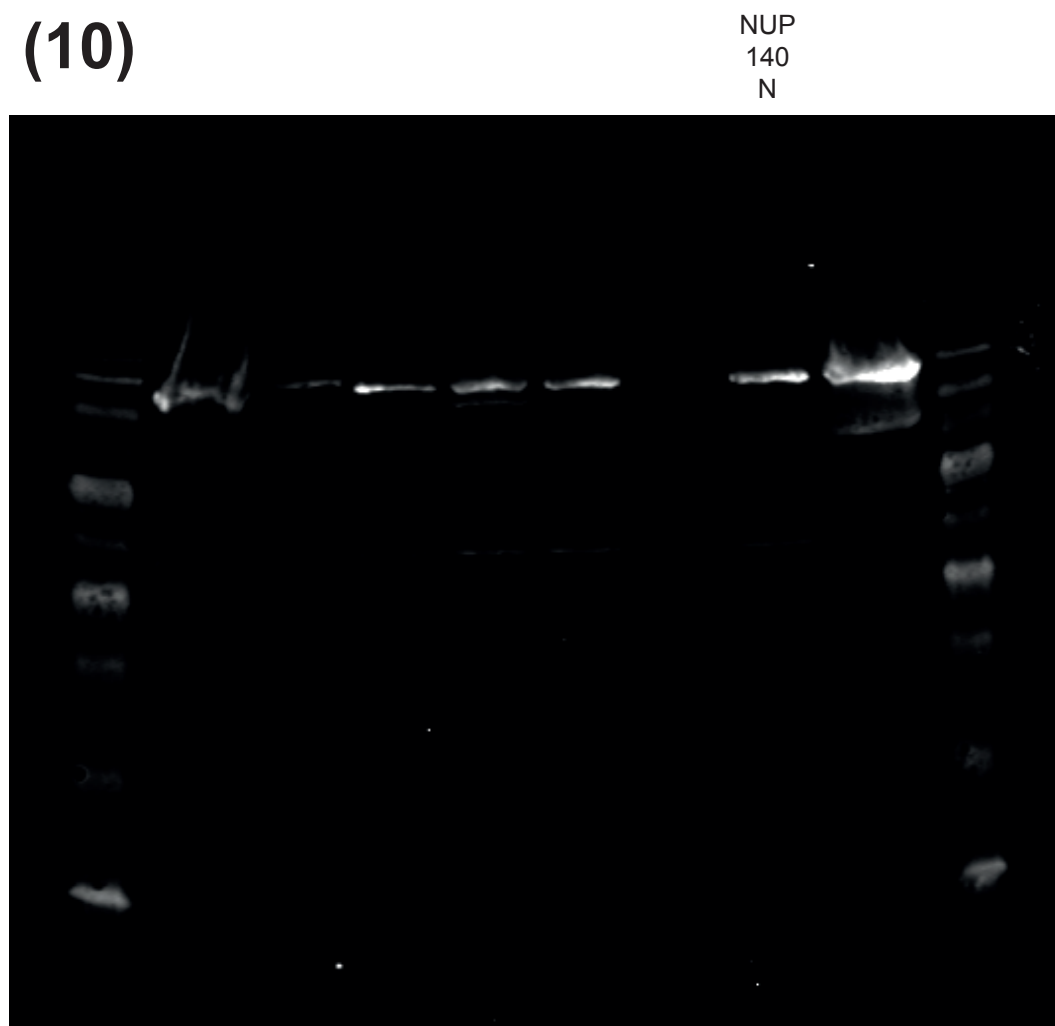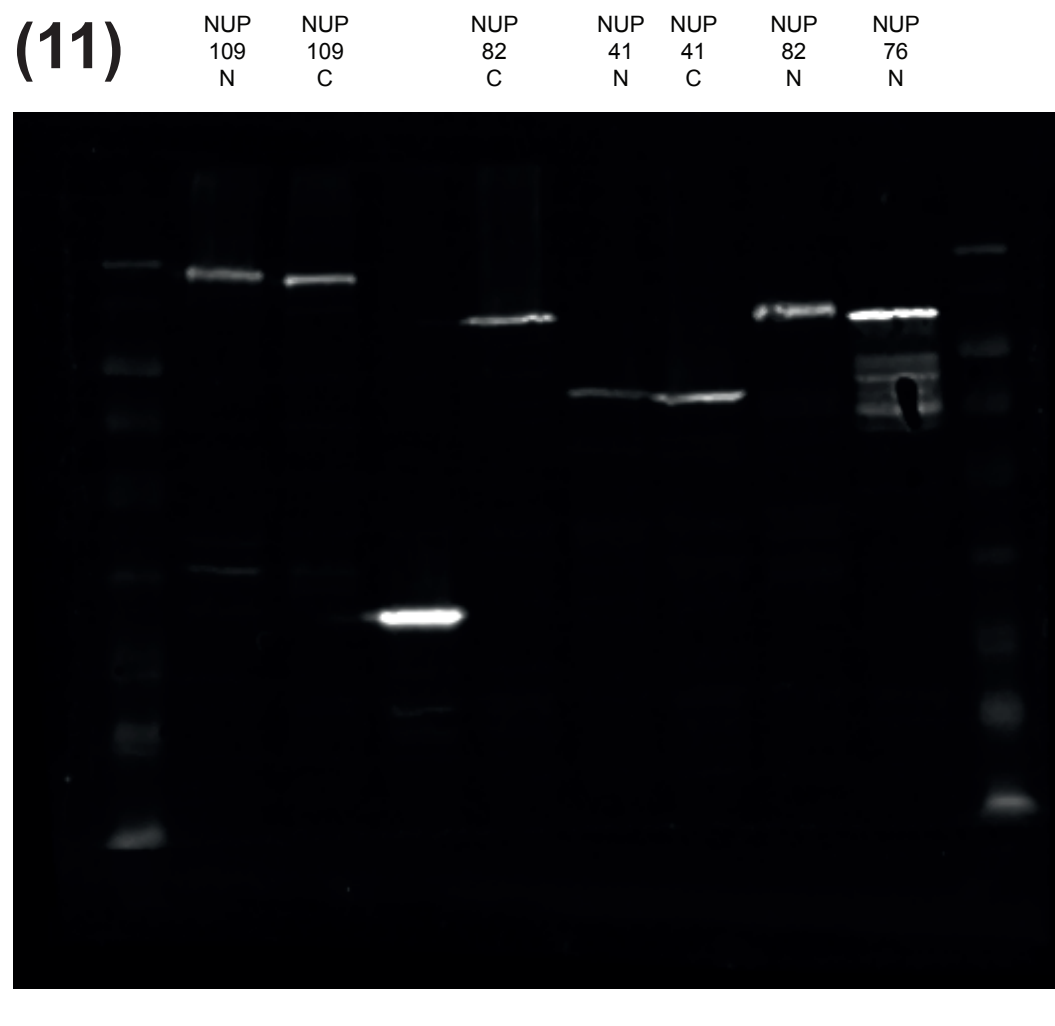

Supplement: fig5-figsupp1-data1 [file elife-95028-fig5-figsupp1-data1-v1.pdf]
