# Supplementary material for: Detection of TurboID fusion proteins by fluorescent streptavidin outcompetes antibody signals and visualises targets not accessible to antibodies
Source: eLife journal article supplement (doi:10.7554/elife.95028), 2024-04-03
Supplement: fig5-figsupp1-data2 [file Figure 5–figure supplement 1-source data 2. Uncropped and Unlabeled gels for Figure 5.Gel9.pdf › eLife.95028.SourceData2.Raw and unedited_gels_for_Figure5_FigureSupplement1/Figure 5–figure supplement 1-source data 2. Uncropped and Unlabeled gels for Figure 5.Gel9.pdf]

1990-1991 1991-1992 1992-1993 1993-1994 1994-1995 1995-1996
