# Supplementary material for: Detection of TurboID fusion proteins by fluorescent streptavidin outcompetes antibody signals and visualises targets not accessible to antibodies
Source: eLife. 2024 Aug 29;13:RP95028. doi: 10.7554/eLife.95028 (PMC11361705; doi:10.7554/eLife.95028)
Supplement: Supplementary file 2. [file elife-95028-supp2.xlsx]

## Sheet: Table S2A
Protein IDs	Majority protein IDs	Gene IDs	Product Description	MEX67: -Log(P-value)	MEX67: Difference	NUP110C: -Log(P-value)	NUP110C: Difference	NUP110N -Log(P-value)	NUP110N Difference	NUP76C: -Log(P-value)	NUP76C: Difference	NUP76N -Log(P-value)	NUP76N Difference	NUP96C: -Log(P-value)	NUP96C: Difference	NUP96N -Log(P-value)	NUP96N Difference	NUP158C: -Log(P-value)	NUP158C: Difference	GFP-Control: -Log(P-value)	GFP-Control: Difference	GFP-Control: Significant Class A	GFP-Control: Significant Class B	MEX67: Significant Class A	MEX67: Significant Class B	NUP110C: Significant Class A	NUP110C: Significant Class B	NUP110N Significant Class A	NUP110N Significant Class B	NUP158: Significant Class A	NUP158: Significant Class B	NUP76C: Significant Class A	NUP76C: Significant Class B	NUP76N Significant Class A	NUP76N Significant Class B	NUP96C: Significant Class A	NUP96C: Significant Class B	NUP96N Significant Class A	NUP96N Significant Class B	Computed GO Component IDs	Computed GO Components	Computed GO Function IDs	Computed GO Functions	Computed GO Process IDs	Computed GO Processes	Curated GO Component IDs	Curated GO Components	Curated GO Function IDs	Curated GO Functions
Tb927.3.3180:mRNA-p1;Tb11.v5.0584.1-p1	Tb927.3.3180:mRNA-p1;Tb11.v5.0584.1-p1	Tb927.3.3180;Tb11.v5.0584	hypothetical protein, conserved;Nucleoporin NUP98	4.71091	10.2148	2.68245	7.43024	3.43828	9.23891	1.01688	-1.50216	1.12725	1.89865	3.6528	11.0355	3.43863	9.27737	4.59143	8.71987	0.473034	2.0897			+	+	+	+	+	+	+	+				+	+	+	+	+	N/A	N/A	N/A	N/A	N/A	N/A	GO:0005634;GO:0005643;GO:0044613;N/A	N/A;nuclear pore;nuclear pore central transport channel;nucleus	N/A	N/A
Tb927.4.4310:mRNA-p1	Tb927.4.4310:mRNA-p1	Tb927.4.4310	Nucleoporin NUP64	3.17017	9.37444	1.7591	6.32081	1.81391	6.18263	0.0185821	0.0795692	0.118783	0.482806	2.36507	9.60345	2.21104	8.45813	2.26931	5.24991	0.530703	1.85315			+	+		+			+	+					+	+		+	N/A	N/A	N/A	N/A	N/A	N/A	GO:0005634;GO:0005643;GO:0044613	nuclear pore;nuclear pore central transport channel;nucleus	N/A	N/A
Tb927.11.12800:mRNA-p1;Tb927.11.12790:mRNA-p1;Tb927.11.12780.1-p1;Tb927.11.12810:mRNA-p1;Tb11.v5.0288.1-p1;Tb927.11.12820:mRNA-p1	Tb927.11.12800:mRNA-p1;Tb927.11.12790:mRNA-p1;Tb927.11.12780.1-p1;Tb927.11.12810:mRNA-p1;Tb11.v5.0288.1-p1;Tb927.11.12820:mRNA-p1	Tb927.11.12800;Tb927.11.12790;Tb927.11.12780;Tb927.11.12810;Tb11.v5.0288;Tb927.11.12820	ribonucleoside-diphosphate reductase small chain, putative;ribonucleoside-diphosphate reductase small chain, putative;ribonucleoside-diphosphate reductase small chain;ribonucleoside-diphosphate reductase small chain;ribonucleoside-diphosphate reductase small chain;ribonucleoside-diphosphate reductase small chain	4.16414	8.70514	2.61542	8.19086	3.07621	8.15695	0.833972	-1.28142	1.21878	2.16376	3.05503	7.74137	2.76535	6.15138	3.84822	6.71871	2.9413	7.29317	+	+	+	+	+	+	+	+	+	+				+	+	+	+	+	GO:0016021;N/A	integral component of membrane;N/A	GO:0004748;GO:0016491	oxidoreductase activity;ribonucleoside-diphosphate reductase activity, thioredoxin disulfide as acceptor	GO:0009263;GO:0055114	deoxyribonucleotide biosynthetic process;obsolete oxidation-reduction process	GO:0005737;GO:0020015;GO:0031981;N/A	cytoplasm;glycosome;N/A;nuclear lumen	N/A	N/A
Tb927.11.2370:mRNA-p1	Tb927.11.2370:mRNA-p1	Tb927.11.2370	mRNA export factor MEX67	3.60776	8.59749	0.236857	0.655065	0.87858	1.73997	0.161157	-0.399159	1.13484	2.41555	1.01525	2.02865	1.31636	2.7379	0.469175	0.924632	0.470159	-1.10246			+	+										+		+			N/A	N/A	GO:0005515;GO:0046872	metal ion binding;protein binding	N/A	N/A	GO:0005634;GO:0005643;GO:0005737	cytoplasm;nuclear pore;nucleus	GO:0003723;GO:0005515	protein binding;RNA binding
Tb927.11.11080:mRNA-p1	Tb927.11.11080:mRNA-p1	Tb927.11.11080	Nucleoporin NUP149	4.85733	7.2118	1.43831	2.30785	0.241372	-0.453514	4.81245	9.7783	4.23955	10.2807	3.9182	4.93932	3.37269	3.32669	4.91551	5.09104	0.0132891	0.037274			+	+		+			+	+	+	+	+	+	+	+	+	+	N/A	N/A	N/A	N/A	N/A	N/A	GO:0005634;GO:0005643;GO:0005737	cytoplasm;nuclear pore;nucleus	N/A	N/A
Tb10.v4.0052:mRNA-p1;Tb927.10.10360:mRNA-p1;Tb10.v4.0053:mRNA-p1	Tb10.v4.0052:mRNA-p1;Tb927.10.10360:mRNA-p1;Tb10.v4.0053:mRNA-p1	Tb10.v4.0052;Tb927.10.10360;Tb10.v4.0053	microtubule-associated protein 2;hypothetical protein;Microtubule-associated repetitive protein	3.26891	6.96608	1.91163	5.17465	2.27824	6.36477	2.24388	6.17396	2.56398	7.99797	2.53373	7.81106	2.5513	7.85855	3.26644	6.81334	3.79008	10.0762	+	+	+	+		+		+	+	+		+	+	+	+	+	+	+	N/A	N/A	GO:0008017	microtubule binding	N/A	N/A	GO:0005737;GO:0030863;GO:0030992;GO:0036064;N/A	ciliary basal body;cortical cytoskeleton;cytoplasm;intraciliary transport particle B;N/A	GO:0008017;N/A	microtubule binding;N/A
Tb927.6.5010:mRNA-p1	Tb927.6.5010:mRNA-p1	Tb927.6.5010	hypothetical protein, conserved	4.49169	6.8401	2.67586	5.5709	3.21994	5.64973	2.87034	4.46216	3.30054	6.70915	3.33915	6.39344	3.20455	5.61749	4.69143	6.73883	4.13736	6.38107	+	+	+	+	+	+	+	+	+	+	+	+	+	+	+	+	+	+	N/A	N/A	N/A	N/A	N/A	N/A	GO:0005634;GO:0005737;GO:0031981;GO:0097014	ciliary plasm;cytoplasm;nuclear lumen;nucleus	GO:0003729	mRNA binding
Tb927.1.880:mRNA-p1;Tb11.v5.0418.1-p1;Tb11.v5.0419.1-p1	Tb927.1.880:mRNA-p1	Tb927.1.880	Midasin, putative	3.69154	6.53367	1.90033	5.43918	3.06595	7.38016	0.447422	-1.03837	1.4403	-2.13374	2.56027	6.72768	2.102	3.51391	1.4785	-2.23191	0.691202	-0.714991			+	+		+	+	+							+	+		+	GO:0005634	nucleus	GO:0005524;GO:0016887	ATP binding;ATP hydrolysis activity	GO:0000027	ribosomal large subunit assembly	GO:0005634;GO:0005654;GO:0005730	nucleolus;nucleoplasm;nucleus	N/A	N/A
Tb927.11.14340:mRNA-p1	Tb927.11.14340:mRNA-p1	Tb927.11.14340	exportin 1	3.16413	6.50504	1.23232	3.36506	1.41978	2.94712	0.412524	-0.834718	2.01791	5.01919	2.16229	5.56163	2.16187	5.47583	0.826953	1.59329	0.153759	-0.359143			+	+		+							+	+	+	+		+	N/A	N/A	GO:0005049	nuclear export signal receptor activity	GO:0006886	intracellular protein transport	GO:0005634;GO:0005643;GO:0005737;GO:0031981	cytoplasm;nuclear lumen;nuclear pore;nucleus	GO:0005049	nuclear export signal receptor activity
Tb927.6.2550:mRNA-p1	Tb927.6.2550:mRNA-p1	Tb927.6.2550	RNA-binding protein, putative	4.13636	6.37313	2.57417	5.67051	2.78646	5.298	0.820662	-1.28593	1.2001	-1.9581	2.75709	4.53621	2.07122	2.53475	1.85919	1.71351	1.98626	4.27647			+	+	+	+	+	+		+					+	+		+	N/A	N/A	GO:0003676	nucleic acid binding	N/A	N/A	GO:0005634;GO:0005654	nucleoplasm;nucleus	GO:0003723;GO:0003729	mRNA binding;RNA binding
Tb927.11.15560:mRNA-p1	Tb927.11.15560:mRNA-p1	Tb927.11.15560	Nucleoporin NUP53a	4.49114	6.24135	0.389246	1.69337	0.522346	1.03997	2.79928	3.59016	3.55605	8.03698	4.40576	9.66717	4.26344	8.44314	2.76657	2.75677	1.21008	-0.990356			+	+					+	+	+	+	+	+	+	+	+	+	GO:0005643	nuclear pore	GO:0017056	structural constituent of nuclear pore	N/A	N/A	GO:0005634;GO:0005643;GO:0044613	nuclear pore;nuclear pore central transport channel;nucleus	GO:0005543;GO:0017056	phospholipid binding;structural constituent of nuclear pore
Tb927.8.3310:mRNA-p1	Tb927.8.3310:mRNA-p1	Tb927.8.3310	Elongator-like Protein 3b	3.20741	6.1331	2.02747	5.56657	2.17084	5.28736	0.313293	-0.733177	0.710823	-1.31359	1.86526	4.18261	1.33256	2.75034	2.87523	4.92421	1.62109	3.80197			+	+		+		+	+	+					+	+			N/A	N/A	GO:0000049;GO:0003824;GO:0008080;GO:0046872;GO:0051536;GO:0051539	4 iron, 4 sulfur cluster binding;catalytic activity;iron-sulfur cluster binding;metal ion binding;N-acetyltransferase activity;tRNA binding	N/A	N/A	GO:0005634;GO:0005730;GO:0005737;GO:0005819;GO:0031981;GO:0033588	cytoplasm;elongator holoenzyme complex;nuclear lumen;nucleolus;nucleus;spindle	GO:0008080	N-acetyltransferase activity
Tb927.10.6630:mRNA-p1	Tb927.10.6630:mRNA-p1	Tb927.10.6630	ATP-dependent RNA helicase DBP2A, putative	4.25297	5.9883	1.54204	3.24847	1.68515	2.17663	1.56668	-1.9112	0.761885	-1.02067	2.05095	1.88272	0.305358	-0.249812	0.986745	1.38502	1.04499	2.07566			+	+		+									+	+			N/A	N/A	GO:0003676;GO:0004386;GO:0005524	ATP binding;helicase activity;nucleic acid binding	N/A	N/A	GO:0005634;GO:0005730;GO:0005737;GO:0005829;GO:1990904	cytoplasm;cytosol;nucleolus;nucleus;ribonucleoprotein complex	GO:0003723;GO:0003724;GO:0004386;GO:0005524	ATP binding;helicase activity;RNA binding;RNA helicase activity
Tb927.4.2740:mRNA-p1	Tb927.4.2740:mRNA-p1	Tb927.4.2740	p25-alpha, putative	4.51668	5.92458	2.4723	4.27705	2.91546	4.49781	2.75719	3.46428	3.06196	4.44512	3.08016	4.62092	2.85958	3.76278	4.64909	5.72493	3.09051	6.7955	+	+	+	+		+	+	+	+	+	+	+	+	+	+	+	+	+	N/A	N/A	N/A	N/A	N/A	N/A	GO:0005737;GO:0031981;GO:0097014	ciliary plasm;cytoplasm;nuclear lumen	N/A	N/A
Tb927.10.8650:mRNA-p1;Tb11.v5.0707.1-p1	Tb927.10.8650:mRNA-p1;Tb11.v5.0707.1-p1	Tb927.10.8650;Tb11.v5.0707	hypothetical protein, conserved;ran binding protein, putative	3.86488	5.79378	1.97809	4.89376	2.97093	5.44614	1.25284	-1.26027	1.38672	-1.82359	2.81299	5.07135	2.41265	3.38168	2.85341	3.3498	0.0862519	0.198026			+	+		+	+	+	+	+					+	+		+	N/A	N/A	N/A	N/A	GO:0046907	intracellular transport	GO:0005634;GO:0005643;GO:0005654;GO:0005730;GO:0031981;N/A	N/A;nuclear lumen;nuclear pore;nucleolus;nucleoplasm;nucleus	GO:0005515;N/A	N/A;protein binding
Tb927.9.6560:mRNA-p1	Tb927.9.6560:mRNA-p1	Tb927.9.6560	NAK family pseudokinase, putative	3.15264	5.75171	0.914578	2.35137	0.543896	1.37327	0.275888	0.724635	2.18178	4.95988	2.06227	4.52288	1.93276	4.13707	2.80272	4.52109	2.74678	6.67008		+	+	+					+	+			+	+	+	+		+	N/A	N/A	GO:0004672;GO:0005524	ATP binding;protein kinase activity	GO:0006468	protein phosphorylation	GO:0005737;GO:0030133;GO:0051286;GO:0097014	cell tip;ciliary plasm;cytoplasm;transport vesicle	GO:0004672;GO:0005524	ATP binding;protein kinase activity
Tb927.4.960:mRNA-p1	Tb927.4.960:mRNA-p1	Tb927.4.960	WD domain, G-beta repeat, putative	3.38459	5.71208	1.20238	2.04215	1.43067	2.9787	1.84816	3.48254	2.19336	4.50043	1.94179	3.62187	1.21221	2.08197	3.62712	6.12786	2.27563	4.22508		+	+	+					+	+			+	+	+	+			N/A	N/A	GO:0005515	protein binding	N/A	N/A	GO:0005737;GO:0030133	cytoplasm;transport vesicle	N/A	N/A
Tb927.7.6770:mRNA-p1	Tb927.7.6770:mRNA-p1	Tb927.7.6770	Acyl CoA binding protein, putative	3.37245	5.55414	2.43271	5.25436	2.67037	5.47469	2.26344	3.85364	2.59637	5.12462	2.77536	5.80264	2.46897	4.73312	3.72563	5.60593	2.64084	6.00876		+	+	+		+	+	+	+	+		+	+	+	+	+		+	N/A	N/A	GO:0000062	fatty-acyl-CoA binding	N/A	N/A	GO:0005654;GO:0005737;GO:0097014	ciliary plasm;cytoplasm;nucleoplasm	N/A	N/A
Tb927.10.11230:mRNA-p1	Tb927.10.11230:mRNA-p1	Tb927.10.11230	Ras-induced vulval development antagonist, putative	3.54792	5.45684	2.82371	6.57067	3.21783	6.48226	1.09131	-1.34184	0.0419165	0.0950572	3.26827	6.3276	2.52972	4.48203	3.0987	3.02457	1.99352	3.46634			+	+	+	+	+	+	+	+					+	+		+	N/A	N/A	GO:0003682	chromatin binding	N/A	N/A	GO:0005634;GO:0005654;GO:0005737	cytoplasm;nucleoplasm;nucleus	N/A	N/A
Tb927.8.8050:mRNA-p1	Tb927.8.8050:mRNA-p1	Tb927.8.8050	Nucleoporin NUP75	3.20432	5.42471	1.38846	-1.31593	0.0653079	-0.161659	1.07099	-1.36853	3.00038	-2.02824	4.21287	5.83502	3.49731	4.91052	0.914753	-1.24674	1.58428	-1.3868			+	+											+	+	+	+	N/A	N/A	N/A	N/A	N/A	N/A	GO:0005643;GO:0005730	nuclear pore;nucleolus	N/A	N/A
Tb927.9.7670:mRNA-p1	Tb927.9.7670:mRNA-p1	Tb927.9.7670	hypothetical protein, conserved	2.86066	5.38432	0.542979	-1.11633	0.330288	-0.871913	0.305301	-1.07389	0.28124	-1.03035	0.0769011	-0.191251	0.433988	-0.921863	0.854257	3.10395	2.19304	3.71744		+	+	+															N/A	N/A	N/A	N/A	N/A	N/A	GO:0005634;GO:0005730	nucleolus;nucleus	N/A	N/A
Tb927.7.5850:mRNA-p1	Tb927.7.5850:mRNA-p1	Tb927.7.5850	hypothetical protein, conserved	4.18521	5.35248	2.59047	4.4412	3.54674	3.99465	0.691454	-0.96244	1.87738	-1.2715	3.38739	2.94485	2.10907	1.46245	0.524458	1.35143	0.386111	1.93687			+	+	+	+	+	+							+	+		+	N/A	N/A	N/A	N/A	N/A	N/A	GO:0005634;GO:0031981	nuclear lumen;nucleus	N/A	N/A
Tb927.6.3870:mRNA-p1	Tb927.6.3870:mRNA-p1	Tb927.6.3870	RNA-binding protein, putative	3.36821	5.24959	2.43795	6.15278	2.59633	4.32806	1.05038	-1.1801	0.207871	0.651085	2.48723	3.85315	0.238501	0.515676	2.10897	2.61985	0.30716	1.46712			+	+		+	+	+		+					+	+			N/A	N/A	GO:0003676	nucleic acid binding	N/A	N/A	GO:0031981	nuclear lumen	GO:0003723	RNA binding
Tb927.10.12110:mRNA-p1	Tb927.10.12110:mRNA-p1	Tb927.10.12110	hypothetical protein, conserved	3.27795	5.23063	2.58954	5.26681	3.22836	5.22121	1.44448	-1.2911	0.150742	0.356471	3.14032	4.51619	1.30746	-1.1825	4.021	4.32163	2.17135	3.82692		+	+	+	+	+	+	+	+	+					+	+			N/A	N/A	N/A	N/A	N/A	N/A	GO:0005654	nucleoplasm	N/A	N/A
Tb927.8.2820:mRNA-p1	Tb927.8.2820:mRNA-p1	Tb927.8.2820	hypothetical protein, conserved	3.17749	5.13991	0.792519	1.86073	1.8354	3.4165	1.49449	2.57626	2.35057	5.7568	2.29925	4.99625	2.13226	4.41867	3.05092	4.71223	2.76654	6.05185		+	+	+					+	+			+	+	+	+		+	N/A	N/A	N/A	N/A	N/A	N/A	GO:0012505;GO:0020016;GO:0030133;GO:0051286	cell tip;ciliary pocket;endomembrane system;transport vesicle	N/A	N/A
Tb927.10.9020:mRNA-p1;Tb11.v5.0508.1-p1	Tb927.10.9020:mRNA-p1	Tb927.10.9020	Gcd10p family, putative	2.81056	5.06992	1.18985	3.33351	1.77902	3.97254	0.28641	-0.898192	1.36274	-2.78843	0.661051	-1.28548	0.537937	-1.04339	1.11937	1.69849	0.981693	2.56441			+	+															GO:0031515	tRNA (m1A) methyltransferase complex	N/A	N/A	GO:0030488	tRNA methylation	GO:0005634;GO:0005643;GO:0005654;GO:0031515	nuclear pore;nucleoplasm;nucleus;tRNA (m1A) methyltransferase complex	N/A	N/A
Tb927.9.5190:mRNA-p1	Tb927.9.5190:mRNA-p1	Tb927.9.5190	proliferating cell nuclear antigen	3.12843	4.95604	1.8997	4.39083	2.03268	3.96677	0.615881	-0.961029	0.850628	-1.41205	1.83046	3.43776	0.0756987	-0.194393	1.92823	2.82054	1.02976	1.78958			+	+		+				+					+	+			N/A	N/A	GO:0003677;GO:0030337	DNA binding;DNA polymerase processivity factor activity	GO:0006275	regulation of DNA replication	GO:0005634;GO:0005654;GO:0005730;GO:0005737;GO:0043626	cytoplasm;nucleolus;nucleoplasm;nucleus;PCNA complex	GO:0030337	DNA polymerase processivity factor activity
Tb927.8.750:mRNA-p1	Tb927.8.750:mRNA-p1	Tb927.8.750	nucleolar RNA-binding protein, putative	3.80647	4.93856	2.20444	3.59788	1.06322	-1.06764	0.241414	0.227063	1.39802	-1.17739	0.11859	0.111478	0.738489	-0.578199	1.19076	-1.24915	0.197465	0.518967			+	+		+													N/A	N/A	N/A	N/A	N/A	N/A	GO:0005634;GO:0005654;GO:0005730	nucleolus;nucleoplasm;nucleus	GO:0003723	RNA binding
Tb927.7.2300:mRNA-p1	Tb927.7.2300:mRNA-p1	Tb927.7.2300	Nucleoporin NUP132	4.2083	4.83119	3.23599	6.23376	3.76355	6.65539	3.40863	5.17015	3.67007	7.55078	4.141	9.06045	4.08992	8.49968	5.14103	6.62999	3.70102	3.17433	+	+	+	+	+	+	+	+	+	+	+	+	+	+	+	+	+	+	N/A	N/A	N/A	N/A	N/A	N/A	GO:0005634;GO:0005643;GO:0031080	nuclear pore;nuclear pore outer ring;nucleus	N/A	N/A
Tb927.7.970:mRNA-p1	Tb927.7.970:mRNA-p1	Tb927.7.970	60S ribosomal export protein NMD3	2.55456	4.82737	1.51649	-2.74269	0.31144	-0.552457	0.662611	-1.50007	1.89417	-3.75084	0.726356	-2.66583	0.461488	-0.793875	0.817444	-2.56147	0.834233	-1.58569				+															N/A	N/A	GO:0043023	ribosomal large subunit binding	N/A	N/A	GO:0005634;GO:0005654;GO:0005737;GO:0097740	cytoplasm;nucleoplasm;nucleus;paraflagellar rod	GO:0043023	ribosomal large subunit binding
Tb927.9.11070:mRNA-p1	Tb927.9.11070:mRNA-p1	Tb927.9.11070	E3 SUMO-protein ligase SIZ1	2.33738	4.62653	1.24463	2.50024	1.0802	1.9827	0.444551	-1.21833	1.20764	-2.3386	0.698775	1.28438	0.807883	-1.47778	2.18972	3.21045	1.81595	3.46025				+						+									N/A	N/A	GO:0008270	zinc ion binding	N/A	N/A	GO:0005634;GO:0005654;GO:0031981	nuclear lumen;nucleoplasm;nucleus	N/A	N/A
Tb927.10.11210:mRNA-p1	Tb927.10.11210:mRNA-p1	Tb927.10.11210	hypothetical protein, conserved	4.53439	4.62156	2.17903	4.23098	3.56247	3.80789	0.299582	-0.697231	0.719402	-1.25305	4.33517	3.02918	0.150543	0.227036	3.67191	2.13104	1.23637	2.67457			+	+		+	+	+	+	+					+	+			N/A	N/A	GO:0005515	protein binding	GO:0036265;GO:0106004	RNA (guanine-N7)-methylation;tRNA (guanine-N7)-methylation	GO:0005634;GO:0005829;GO:0031981;GO:0043527	cytosol;nuclear lumen;nucleus;tRNA methyltransferase complex	N/A	N/A
Tb927.1.2210:mRNA-p1	Tb927.1.2210:mRNA-p1	Tb927.1.2210	nucleosome assembly protein (NAP), putative	3.79864	4.57258	1.13739	2.46108	0.133036	0.385611	1.064	-0.938338	1.94675	-2.10198	1.63651	-1.84427	1.80233	-1.2164	0.622219	1.24486	0.433633	1.46364			+	+															GO:0005634	nucleus	N/A	N/A	GO:0006334	nucleosome assembly	GO:0005634;GO:0005737;GO:0031981;GO:0097014	ciliary plasm;cytoplasm;nuclear lumen;nucleus	GO:0003682;GO:0042393	chromatin binding;histone binding
Tb927.10.7420:mRNA-p1	Tb927.10.7420:mRNA-p1	Tb927.10.7420	bromodomain factor 2 protein, putative	3.35299	4.56452	2.24749	4.35094	2.39453	3.88361	0.554571	-0.62046	1.92523	-2.54949	2.27041	3.68202	1.27155	-1.5241	0.339213	1.07742	0.559223	1.98814			+	+		+		+							+	+			N/A	N/A	GO:0005515	protein binding	N/A	N/A	GO:0005634	nucleus	GO:0042393	histone binding
Tb927.10.1500:mRNA-p1	Tb927.10.1500:mRNA-p1	Tb927.10.1500	methionyl-tRNA synthetase, putative	2.81837	4.55999	0.430995	1.57911	1.77398	3.54003	1.15444	2.52102	2.02666	4.64545	1.7983	3.58406	1.49282	2.76514	2.97701	4.94342	3.20233	6.51611	+	+	+	+					+	+			+	+	+	+		+	N/A	N/A	GO:0000166;GO:0004812;GO:0004825;GO:0005524	aminoacyl-tRNA ligase activity;ATP binding;methionine-tRNA ligase activity;nucleotide binding	GO:0006418;GO:0006431	methionyl-tRNA aminoacylation;tRNA aminoacylation for protein translation	GO:0005737;GO:0097014	ciliary plasm;cytoplasm	GO:0004825;GO:0005524	ATP binding;methionine-tRNA ligase activity
Tb927.11.5150:mRNA-p1	Tb927.11.5150:mRNA-p1	Tb927.11.5150	hypothetical protein, conserved	3.83898	4.50446	2.85964	7.68503	3.12288	4.8904	0.308538	-0.279594	1.546	-2.1269	0.0322437	-0.0505892	0.21815	-0.334032	1.85275	-1.46374	0.373601	-0.323269			+	+	+	+	+	+											N/A	N/A	N/A	N/A	N/A	N/A	GO:0005634;GO:0005654	nucleoplasm;nucleus	GO:0003729	mRNA binding
Tb927.8.1090:mRNA-p1	Tb927.8.1090:mRNA-p1	Tb927.8.1090	NPAPL	3.0439	4.50251	1.30644	3.15729	1.96806	3.02058	0.294585	-0.686198	0.533297	-0.669516	0.0209922	0.0510511	0.258099	0.476501	0.108916	-0.152426	0.337999	0.741865			+	+		+													N/A	N/A	GO:0050265	RNA uridylyltransferase activity	N/A	N/A	GO:0005634;GO:0005654;GO:0005730;GO:0030133;GO:0031499	nucleolus;nucleoplasm;nucleus;TRAMP complex;transport vesicle	GO:0003676;GO:0004652;GO:0016779	nucleic acid binding;nucleotidyltransferase activity;polynucleotide adenylyltransferase activity
Tb927.10.7680:mRNA-p1	Tb927.10.7680:mRNA-p1	Tb927.10.7680	GTPase activating protein, putative	3.45739	4.45121	0.118677	-0.22681	1.27156	-1.18563	3.01771	6.0638	3.38142	6.87591	1.67296	1.72439	0.40038	0.341753	3.09335	2.93781	0.75719	-1.34965			+	+					+	+	+	+	+	+	+	+			N/A	N/A	N/A	N/A	N/A	N/A	GO:0005634;GO:0005643	nuclear pore;nucleus	GO:0005096	GTPase activator activity
Tb927.2.5240:mRNA-p1	Tb927.2.5240:mRNA-p1	Tb927.2.5240	pre-mRNA splicing factor 19	2.18803	4.42253	1.60682	4.98973	1.83809	5.39441	0.00334634	0.0118767	0.269887	-0.736498	1.56376	4.3007	1.20595	3.06618	0.865032	1.63142	0.880407	2.44196				+		+									+	+			GO:0000974;GO:0005840	Prp19 complex;ribosome	GO:0004842;GO:0005515;GO:0061630	protein binding;ubiquitin protein ligase activity;ubiquitin-protein transferase activity	GO:0000398;GO:0006281;GO:0016567	DNA repair;mRNA splicing, via spliceosome;protein ubiquitination	GO:0000974;GO:0005634;GO:0005654;GO:0005730;GO:0071006;GO:0071013	catalytic step 2 spliceosome;nucleolus;nucleoplasm;nucleus;Prp19 complex;U2-type catalytic step 1 spliceosome	GO:0004842	ubiquitin-protein transferase activity
Tb927.10.13720:mRNA-p1	Tb927.10.13720:mRNA-p1	Tb927.10.13720	RNA-binding protein 29, putative	2.90916	4.39841	1.34192	3.61608	1.30351	2.25319	1.3927	-2.01594	1.38742	-1.37061	0.12912	0.355067	0.216515	-0.337091	0.132551	0.33497	0.139239	0.566143			+	+		+													N/A	N/A	GO:0003676	nucleic acid binding	N/A	N/A	GO:0005634;GO:0005654	nucleoplasm;nucleus	GO:0003723;GO:0003729	mRNA binding;RNA binding
Tb11.02.5400b.1-p1;Tb11.02.5400:mRNA-p1;REV__Tb11.02.5400b.1-p1;REV__Tb11.02.5400:mRNA-p1	Tb11.02.5400b.1-p1;Tb11.02.5400:mRNA-p1	Tb11.02.5400b;Tb11.02.5400	cystathionine beta-synthase, putative;cystathionine beta-synthase, putative	2.56249	4.2932	0.834122	3.00556	1.82945	3.69046	0.290192	0.610017	2.13153	4.88984	2.00767	4.32146	1.70192	3.32434	2.54203	3.90554	2.38353	5.78857		+		+					+	+			+	+	+	+		+	N/A	N/A	N/A	N/A	GO:0006535	cysteine biosynthetic process from serine	GO:0005737	cytoplasm	GO:0004122;GO:0030170	cystathionine beta-synthase activity;pyridoxal phosphate binding
Tb927.6.4410:mRNA-p1;Tb927.6.4460:mRNA-p1;Tb11.v5.0903.1-p1	Tb927.6.4410:mRNA-p1;Tb927.6.4460:mRNA-p1;Tb11.v5.0903.1-p1	Tb927.6.4410;Tb927.6.4460;Tb11.v5.0903	S-adenosylmethionine decarboxylase proenzyme, putative;S-adenosylmethionine decarboxylase;S-adenosylmethionine decarboxylase	3.41918	4.28321	1.62776	3.89556	2.31349	3.04532	1.41071	-1.39443	2.39146	3.88173	2.7693	4.34484	2.13981	3.10121	3.33672	3.48818	2.85285	5.12562		+	+	+		+		+	+	+			+	+	+	+		+	N/A	N/A	GO:0004014	adenosylmethionine decarboxylase activity	GO:0006557;GO:0006597;GO:0008295	S-adenosylmethioninamine biosynthetic process;spermidine biosynthetic process;spermine biosynthetic process	GO:0005737;GO:0005829;GO:0097014;N/A	ciliary plasm;cytoplasm;cytosol;N/A	GO:0004014;N/A	adenosylmethionine decarboxylase activity;N/A
Tb927.7.2330:mRNA-p1	Tb927.7.2330:mRNA-p1	Tb927.7.2330	Protein of unknown function (DUF1663), putative	4.07045	4.26077	3.54066	3.47972	0.271573	-0.160103	4.87761	10.3344	4.39703	8.44147	4.25633	5.83801	3.53969	4.51459	5.1085	5.56909	0.0851147	0.240168			+	+	+	+			+	+	+	+	+	+	+	+	+	+	N/A	N/A	N/A	N/A	N/A	N/A	GO:0005634;GO:0005635	nuclear envelope;nucleus	N/A	N/A
Tb927.7.1780:mRNA-p1	Tb927.7.1780:mRNA-p1	Tb927.7.1780	Adenine phosphoribosyltransferase, putative	2.96194	4.22616	0.52061	2.56772	2.81847	4.27263	0.662783	-1.01841	2.80648	4.30262	2.74235	4.24814	2.30755	3.23403	3.28263	4.2886	2.4678	5.46958		+	+	+			+	+	+	+			+	+	+	+		+	N/A	N/A	N/A	N/A	GO:0009116	nucleoside metabolic process	GO:0005737;GO:0020015;GO:0031981;GO:0097014	ciliary plasm;cytoplasm;glycosome;nuclear lumen	GO:0003999	adenine phosphoribosyltransferase activity
Tb927.9.5730:mRNA-p1	Tb927.9.5730:mRNA-p1	Tb927.9.5730	nucleosome assembly protein-like protein	2.46495	4.21351	0.142859	-0.46626	1.07051	1.7723	1.86948	3.64472	2.25918	5.2935	1.48737	2.84636	1.80456	3.44135	2.65318	4.04573	2.13949	5.7489		+		+					+	+			+	+		+		+	GO:0005634	nucleus	N/A	N/A	GO:0006334	nucleosome assembly	GO:0005634;GO:0005730;GO:0005737	cytoplasm;nucleolus;nucleus	GO:0003682;GO:0042393	chromatin binding;histone binding
Tb927.3.3540:mRNA-p1	Tb927.3.3540:mRNA-p1	Tb927.3.3540	Nucleoporin NUP53b	2.55441	4.15473	0.296566	1.12763	0.496542	-0.445176	0.587514	-0.730836	0.0931343	0.348779	4.02912	9.23079	3.91879	8.25879	1.09891	-0.748079	1.83815	-1.02619				+											+	+	+	+	N/A	N/A	N/A	N/A	N/A	N/A	GO:0005634;GO:0005643;GO:0044613	nuclear pore;nuclear pore central transport channel;nucleus	N/A	N/A
Tb927.10.14390:mRNA-p1	Tb927.10.14390:mRNA-p1	Tb927.10.14390	FACT complex subunit POB3	3.12834	4.09725	1.86842	3.38667	3.35502	3.72665	0.880959	-1.05523	3.1027	-2.20138	0.0657127	-0.31478	1.77331	-1.58249	2.51733	1.6769	0.519914	1.26095			+	+		+	+	+		+									N/A	N/A	N/A	N/A	N/A	N/A	GO:0005634;GO:0005654;GO:0035101	FACT complex;nucleoplasm;nucleus	GO:0031491;GO:0042393	histone binding;nucleosome binding
Tb927.9.13480:mRNA-p1	Tb927.9.13480:mRNA-p1	Tb927.9.13480	Eukaryotic protein of unknown function (DUF1764), putative	3.06833	4.09279	0.396857	-0.503394	0.241035	-0.435966	0.267259	-0.472608	1.58943	-2.09967	0.025206	-0.150918	0.552998	-0.670653	0.0294034	-0.105476	0.376742	1.56446			+	+															N/A	N/A	N/A	N/A	N/A	N/A	GO:0005654;GO:0005730	nucleolus;nucleoplasm	N/A	N/A
Tb927.11.15030:mRNA-p1	Tb927.11.15030:mRNA-p1	Tb927.11.15030	small GTPase	1.86594	4.08923	0.0386699	0.27118	1.33989	2.98058	0.447131	-0.970798	1.50456	3.42992	1.31857	2.89928	1.22617	2.66858	1.49453	2.61543	1.59988	5.18847										+			+	+		+			N/A	N/A	GO:0003924;GO:0005525	GTP binding;GTPase activity	N/A	N/A	GO:0005929;GO:0012505;GO:0036064;GO:0120280	ciliary basal body;ciliary pro-basal body;cilium;endomembrane system	GO:0003924	GTPase activity
Tb927.9.7110:mRNA-p1	Tb927.9.7110:mRNA-p1	Tb927.9.7110	GRAM domain containing protein, putative	2.34004	4.0723	1.61545	4.5524	1.86349	4.43178	1.07589	2.31876	1.79195	4.22822	1.93992	4.71991	1.16638	2.6941	2.56957	4.49577	2.06724	5.60593				+		+			+	+			+	+	+	+			N/A	N/A	N/A	N/A	N/A	N/A	GO:0005737;GO:0030133	cytoplasm;transport vesicle	N/A	N/A
Tb927.4.1330:mRNA-p1	Tb927.4.1330:mRNA-p1	Tb927.4.1330	DNA topoisomerase IB, large subunit	1.87842	4.05164	0.669992	-1.80234	0.114659	-0.374228	0.250769	-0.765691	0.443301	-1.23568	0.413251	-1.62004	0.335507	-0.996286	0.1243	-0.30452	0.104768	0.341497																			GO:0005694	chromosome	GO:0003677;GO:0003917	DNA binding;DNA topoisomerase type I (single strand cut, ATP-independent) activity	GO:0006265	DNA topological change	GO:0005634;GO:0005654;GO:0005730;GO:0016020;GO:0031981	membrane;nuclear lumen;nucleolus;nucleoplasm;nucleus	GO:0003917	DNA topoisomerase type I (single strand cut, ATP-independent) activity
Tb927.10.15360:mRNA-p1	Tb927.10.15360:mRNA-p1	Tb927.10.15360	hypothetical protein, conserved	3.49559	4.03548	2.02738	4.47211	2.10905	2.45293	0.11817	-0.245564	0.548118	-0.806958	0.668846	0.949021	0.533957	-0.49682	0.441366	-0.655918	0.579981	0.605395			+	+		+													N/A	N/A	GO:0003723	RNA binding	GO:0006396	RNA processing	GO:0005634;GO:0005654	nucleoplasm;nucleus	N/A	N/A
Tb927.7.2080:mRNA-p1	Tb927.7.2080:mRNA-p1	Tb927.7.2080	cap guanylyltransferase-methyltransferase 1	2.31263	3.88113	1.37227	3.07038	0.262875	1.07477	0.139595	-0.402723	0.43767	-0.900828	0.372891	-0.869743	1.04453	-2.01467	1.45462	2.21523	0.0256113	0.0626132				+		+				+									N/A	N/A	GO:0003723;GO:0004482	mRNA (guanine-N7-)-methyltransferase activity;RNA binding	N/A	N/A	GO:0000932;GO:0005634;GO:0005845	mRNA cap binding complex;nucleus;P-body	GO:0004482	mRNA (guanine-N7-)-methyltransferase activity
Tb927.11.14220:mRNA-p1	Tb927.11.14220:mRNA-p1	Tb927.11.14220	Regulator of ESAG9-1	3.07511	3.76397	2.0244	3.34393	0.378675	0.926439	0.103471	-0.205591	1.90006	2.9565	1.854	2.66318	2.09192	3.16691	2.87216	3.41085	2.20131	4.73489		+	+	+		+			+	+			+	+	+	+		+	N/A	N/A	GO:0003676	nucleic acid binding	N/A	N/A	GO:0005737;GO:0010494;GO:0020016	ciliary pocket;cytoplasm;cytoplasmic stress granule	GO:0003729	mRNA binding
Tb927.11.3830:mRNA-p1	Tb927.11.3830:mRNA-p1	Tb927.11.3830	hypothetical protein, conserved	2.18428	3.737	0.0264804	0.0664431	0.0163763	0.0507552	0.225197	0.464563	0.491384	-0.942599	0.119469	0.265127	0.205866	0.456032	0.20931	0.378394	0.524005	-0.818202				+															N/A	N/A	N/A	N/A	N/A	N/A	GO:0005634;GO:0005730	nucleolus;nucleus	N/A	N/A
Tb927.8.5950:mRNA-p1	Tb927.8.5950:mRNA-p1	Tb927.8.5950	mitogen-activated protein kinase kinase 4, putative	2.70051	3.72444	0.864283	2.12411	1.09411	1.77591	1.0892	1.66017	1.55862	3.01422	1.4973	2.57875	1.11235	1.7637	2.46859	3.38341	1.80608	3.99832				+					+	+			+	+		+			N/A	N/A	GO:0004672;GO:0005524	ATP binding;protein kinase activity	GO:0006468	protein phosphorylation	GO:0005634;GO:0005737;GO:0030133;GO:0097014	ciliary plasm;cytoplasm;nucleus;transport vesicle	GO:0004672;GO:0005524	ATP binding;protein kinase activity
Tb927.1.3270:mRNA-p1	Tb927.1.3270:mRNA-p1	Tb927.1.3270	hypothetical protein, conserved	3.70574	3.6904	2.16987	3.26307	2.60977	3.32338	0.927438	-1.19455	1.88557	-1.76206	1.81746	1.73175	0.00386058	-0.00535456	2.20953	1.75014	0.40633	1.1514			+	+		+		+		+					+	+			N/A	N/A	N/A	N/A	N/A	N/A	GO:0005634;GO:0031981	nuclear lumen;nucleus	N/A	N/A
Tb11.v5.0507.1-p1;Tb927.10.15470:mRNA-p1	Tb11.v5.0507.1-p1;Tb927.10.15470:mRNA-p1	Tb11.v5.0507;Tb927.10.15470	hypothetical protein, conserved;hypothetical protein, conserved	3.37646	3.61838	1.82357	3.03211	2.57302	3.29405	1.37459	-1.41069	1.58652	-1.46076	1.63698	1.99819	0.54128	0.513352	3.22522	2.89652	0.352838	1.12957			+	+		+		+	+	+					+	+			N/A	N/A	N/A	N/A	N/A	N/A	GO:0031981;N/A	N/A;nuclear lumen	GO:0008168;N/A	methyltransferase activity;N/A
Tb927.10.11950:mRNA-p1	Tb927.10.11950:mRNA-p1	Tb927.10.11950	hypothetical protein, conserved	3.18354	3.59726	0.391989	1.01264	0.418143	-0.448279	0.79979	-0.583539	1.17098	-1.1004	1.94613	-2.14598	0.466892	-0.368826	0.810185	-1.15833	0.276251	0.689394			+	+															N/A	N/A	N/A	N/A	N/A	N/A	GO:0005634;GO:0031981	nuclear lumen;nucleus	N/A	N/A
Tb927.5.3020:mRNA-p1	Tb927.5.3020:mRNA-p1	Tb927.5.3020	hypothetical protein, conserved	2.93836	3.59255	1.84906	4.5212	2.26459	3.55029	0.472839	-0.543369	1.3932	-1.69449	2.10886	3.22282	0.922479	1.37754	0.381136	-0.55877	0.210487	0.64651			+	+		+		+							+	+			N/A	N/A	GO:0000386;GO:0030628	pre-mRNA 3'-splice site binding;second spliceosomal transesterification activity	GO:0000398	mRNA splicing, via spliceosome	GO:0005654;GO:0005681	nucleoplasm;spliceosomal complex	N/A	N/A
Tb927.8.2000:mRNA-p1	Tb927.8.2000:mRNA-p1	Tb927.8.2000	cyclophilin, putative	2.9391	3.58062	0.015188	0.0696033	1.67161	1.87288	1.48275	-1.52058	2.04139	-2.58911	1.41843	1.50024	1.01814	0.986012	0.0550834	-0.125599	0.104842	-0.329563			+	+												+			N/A	N/A	GO:0003755	peptidyl-prolyl cis-trans isomerase activity	GO:0000413;GO:0006457	protein folding;protein peptidyl-prolyl isomerization	GO:0005634;GO:0005730	nucleolus;nucleus	GO:0003755;GO:0005515;GO:0019843;GO:0042301	peptidyl-prolyl cis-trans isomerase activity;phosphate ion binding;protein binding;rRNA binding
Tb927.11.5560:mRNA-p1	Tb927.11.5560:mRNA-p1	Tb927.11.5560	hypothetical protein, conserved	3.77315	3.57809	2.53329	6.45841	3.7577	4.45509	0.764763	-1.25071	0.779804	-0.398799	3.69029	5.02617	2.73811	2.11762	0.08055	-0.0477587	0.0190247	-0.0244815			+	+	+	+	+	+							+	+		+	N/A	N/A	N/A	N/A	N/A	N/A	GO:0005634;GO:0005643;GO:0005737;GO:0070390	cytoplasm;nuclear pore;nucleus;transcription export complex 2	GO:0003690;GO:0003723	double-stranded DNA binding;RNA binding
Tb927.10.2770:mRNA-p1;Tb11.v5.0684.1-p1	Tb927.10.2770:mRNA-p1;Tb11.v5.0684.1-p1	Tb927.10.2770;Tb11.v5.0684	eukaryotic translation initiation factor 5, putative;eukaryotic translation initiation factor 5, putative	2.2206	3.50647	1.0515	2.32652	1.4388	2.53558	1.6186	2.93421	2.23247	5.29362	1.64865	3.04012	1.57201	2.83091	2.68362	4.02646	2.79048	5.68169		+		+					+	+			+	+	+	+		+	N/A	N/A	GO:0003743;GO:0005515;GO:0005525	GTP binding;protein binding;translation initiation factor activity	GO:0006413	translational initiation	GO:0005737;GO:0005829	cytoplasm;cytosol	GO:0003743;GO:0005092;GO:0071074	eukaryotic initiation factor eIF2 binding;GDP-dissociation inhibitor activity;translation initiation factor activity
Tb927.5.1700:mRNA-p1	Tb927.5.1700:mRNA-p1	Tb927.5.1700	replication Factor A 28 kDa subunit, putative	2.46169	3.49317	1.5873	3.0989	2.04065	2.49364	0.585163	-1.15222	0.60843	-1.41375	1.88858	1.90493	0.56238	0.460396	0.234166	0.709592	0.237016	0.890771				+		+									+	+			GO:0005634	nucleus	GO:0003677	DNA binding	GO:0006260;GO:0006281;GO:0006310	DNA recombination;DNA repair;DNA replication	GO:0000781;GO:0005634;GO:0005654;GO:0005662;GO:0035861	chromosome, telomeric region;DNA replication factor A complex;nucleoplasm;nucleus;site of double-strand break	GO:0003697;GO:0042162	single-stranded DNA binding;telomeric DNA binding
Tb927.3.1240:mRNA-p1	Tb927.3.1240:mRNA-p1	Tb927.3.1240	Serine/threonine-protein phosphatase 2A, putative	3.07887	3.48051	2.78998	6.98315	3.84699	5.94336	0.326053	1.4852	3.69336	5.59159	3.89977	6.52898	3.76452	5.56999	3.88134	3.75143	0.226027	0.600814			+	+	+	+	+	+	+	+			+	+	+	+	+	+	N/A	N/A	GO:0016787;GO:0106306;GO:0106307	hydrolase activity;protein serine phosphatase activity;protein threonine phosphatase activity	N/A	N/A	N/A	N/A	GO:0004722;GO:0016787	hydrolase activity;protein serine/threonine phosphatase activity
Tb927.10.3500:mRNA-p1	Tb927.10.3500:mRNA-p1	Tb927.10.3500	splicing factor u2af 65 kda subunit	2.75566	3.47973	1.27077	2.1582	1.60507	2.12739	1.73154	-2.31457	1.52126	-2.53323	1.1695	1.53844	1.69181	2.39195	0.180602	0.382229	1.04767	1.11248				+												+		+	N/A	N/A	GO:0003676	nucleic acid binding	N/A	N/A	GO:0000243;GO:0005634;GO:0005654;GO:0016607;GO:0071004;GO:0089701	commitment complex;nuclear speck;nucleoplasm;nucleus;U2AF complex;U2-type prespliceosome	GO:0003723;GO:0003729;GO:0005515;GO:0008187;GO:0030628	mRNA binding;poly-pyrimidine tract binding;pre-mRNA 3'-splice site binding;protein binding;RNA binding
Tb927.6.2900:mRNA-p1	Tb927.6.2900:mRNA-p1	Tb927.6.2900	dendritic cell-derived IFNG-induced protein	3.404	3.40764	3.14017	3.24213	3.6984	2.79825	0.690176	-0.641463	3.71739	-2.35159	1.68677	-1.50992	0.82517	-0.218782	1.25522	0.8993	0.939145	1.95464			+	+	+	+	+	+											N/A	N/A	N/A	N/A	N/A	N/A	GO:0005634;GO:0005654;GO:0005730;GO:0005737	cytoplasm;nucleolus;nucleoplasm;nucleus	GO:0008832	dGTPase activity
Tb927.11.13050:mRNA-p1;Tb927.11.13040:mRNA-p1;Tb927.11.13030:mRNA-p1;Tb927.11.13020:mRNA-p1	Tb927.11.13050:mRNA-p1;Tb927.11.13040:mRNA-p1;Tb927.11.13030:mRNA-p1;Tb927.11.13020:mRNA-p1	Tb927.11.13050;Tb927.11.13040;Tb927.11.13030;Tb927.11.13020	calmodulin;calmodulin;calmodulin;calmodulin	2.01799	3.38124	1.78297	4.69811	1.42575	3.15024	0.970739	1.94309	1.60175	3.5825	1.60379	3.70946	1.43822	3.08431	1.96021	2.95898	1.9761	4.60762						+				+			+	+	+	+			N/A	N/A	GO:0005509	calcium ion binding	GO:0019722	calcium-mediated signaling	GO:0000331;GO:0005654;GO:0005737;GO:0005829;GO:0005929;GO:0005930;GO:0097740	axoneme;cilium;contractile vacuole;cytoplasm;cytosol;nucleoplasm;paraflagellar rod	GO:0005509;GO:0030234	calcium ion binding;enzyme regulator activity
Tb927.8.2810:mRNA-p1	Tb927.8.2810:mRNA-p1	Tb927.8.2810	5'-3' exoribonuclease C	3.65432	3.34856	1.84471	3.49293	1.99785	3.12649	0.962876	-0.881576	1.10402	-1.26501	2.19953	2.3205	2.35422	2.2978	0.401363	0.92934	0.387165	1.27596			+	+		+									+	+		+	N/A	N/A	GO:0003676;GO:0004527	exonuclease activity;nucleic acid binding	N/A	N/A	GO:0005634;GO:0005737	cytoplasm;nucleus	GO:0003723;GO:0004527;GO:0004534	5'-3' exoribonuclease activity;exonuclease activity;RNA binding
Tb927.9.6940:mRNA-p1	Tb927.9.6940:mRNA-p1	Tb927.9.6940	DNA topoisomerase type IB small subunit	1.906	3.33117	1.23346	2.94842	0.451637	1.93769	0.491018	-1.1619	0.536502	-1.28815	0.331518	-1.03898	0.229363	-0.683755	0.143169	-0.321091	0.315467	-0.665522																			GO:0005694	chromosome	GO:0003677;GO:0003917	DNA binding;DNA topoisomerase type I (single strand cut, ATP-independent) activity	GO:0006265	DNA topological change	GO:0005634;GO:0005654;GO:0005730;GO:0031298	nucleolus;nucleoplasm;nucleus;replication fork protection complex	GO:0000287;GO:0003917;GO:0005524	ATP binding;DNA topoisomerase type I (single strand cut, ATP-independent) activity;magnesium ion binding
Tb927.11.5730:mRNA-p1	Tb927.11.5730:mRNA-p1	Tb927.11.5730	pre-mRNA-splicing factor ATP-dependent RNA helicase, putative	2.6887	3.28741	0.386685	1.59201	0.680916	0.994948	0.682859	-1.02276	2.80865	-2.18459	2.1755	-1.39317	2.38673	-1.33873	0.717366	0.319199	0.0944353	0.248106				+															N/A	N/A	GO:0003676;GO:0004386;GO:0005524	ATP binding;helicase activity;nucleic acid binding	N/A	N/A	GO:0005634;GO:0005681;GO:0005737;GO:0031981;GO:0097014	ciliary plasm;cytoplasm;nuclear lumen;nucleus;spliceosomal complex	GO:0003676;GO:0003723;GO:0003724	nucleic acid binding;RNA binding;RNA helicase activity
Tb927.7.6620.2:mRNA-p1;Tb927.7.6620.1:mRNA-p1	Tb927.7.6620.2:mRNA-p1;Tb927.7.6620.1:mRNA-p1	Tb927.7.6620	Probable N6-adenine methyltransferase, putative;Probable N6-adenine methyltransferase, putative	2.08576	3.28232	0.119641	0.635922	1.08369	2.1898	0.36771	-0.836245	1.01663	2.08181	1.04381	2.14939	0.1306	0.454281	1.78436	2.85686	2.188	5.22224		+								+				+		+			GO:0005737;N/A	cytoplasm;N/A	GO:0003676;GO:0008168;GO:0016279	methyltransferase activity;nucleic acid binding;protein-lysine N-methyltransferase activity	GO:0032259	methylation	N/A	N/A	N/A	N/A
Tb927.6.160:mRNA-p1	Tb927.6.160:mRNA-p1	Tb927.6.160	retrotransposon hot spot protein 1 (RHS1), putative	2.0249	3.27163	1.3296	3.62852	1.30073	2.52585	0.378282	-1.6398	1.01099	-2.06391	1.04805	1.95581	0.711407	-1.76982	0.0650572	0.258684	0.0705593	0.278577						+										+			N/A	N/A	N/A	N/A	N/A	N/A	GO:0005634;GO:0005737	cytoplasm;nucleus	N/A	N/A
Tb927.11.3970:mRNA-p1	Tb927.11.3970:mRNA-p1	Tb927.11.3970	hypothetical protein, conserved	3.03966	3.22657	1.74963	2.95371	2.0226	2.4941	0.489974	-0.613386	1.11447	-2.30247	1.7281	1.53091	0.186043	-0.277482	0.924041	-1.60953	0.214319	-0.604462			+	+		+									+	+			N/A	N/A	GO:0046872	metal ion binding	N/A	N/A	GO:0005634;GO:0005654;GO:0005730	nucleolus;nucleoplasm;nucleus	GO:0003723	RNA binding
Tb927.5.2290:mRNA-p1	Tb927.5.2290:mRNA-p1	Tb927.5.2290	U5 small nuclear ribonucleoprotein 200 kDa helicase, putative	2.20619	3.21894	0.00507274	0.0165354	0.047148	-0.0772775	1.09906	-1.49265	1.14035	-1.4969	1.47969	-2.34253	0.763894	-1.34142	0.521129	0.799622	0.133693	-0.321579				+															N/A	N/A	GO:0003676;GO:0004386;GO:0005524	ATP binding;helicase activity;nucleic acid binding	N/A	N/A	GO:0005634;GO:0005654;GO:0005682;GO:0005730;GO:0010494	cytoplasmic stress granule;nucleolus;nucleoplasm;nucleus;U5 snRNP	GO:0003729;GO:0030623	mRNA binding;U5 snRNA binding
Tb927.10.15330:mRNA-p1;Tb11.v5.0348.1-p1	Tb927.10.15330:mRNA-p1;Tb11.v5.0348.1-p1	Tb927.10.15330;Tb11.v5.0348	hypothetical protein, conserved;CYTH domain containing protein, putative	2.2007	3.18868	1.45672	4.12515	2.30461	3.746	0.202836	-0.37231	0.454768	-0.875578	1.71311	2.28472	1.36866	1.63683	3.22008	3.64793	0.660892	1.62912				+		+		+	+	+					+	+			N/A	N/A	N/A	N/A	N/A	N/A	GO:0005654;N/A	N/A;nucleoplasm	N/A	N/A
Tb927.5.2950:mRNA-p1	Tb927.5.2950:mRNA-p1	Tb927.5.2950	Component of motile flagella 3	1.64477	3.18241	0.766143	1.28346	1.11816	2.08062	0.211152	-0.504109	1.0918	2.11152	0.447479	0.879975	0.995259	1.68665	2.32805	3.68792	2.56102	4.43152		+							+	+				+					N/A	N/A	GO:0005509	calcium ion binding	N/A	N/A	GO:0005930;GO:0072686	axoneme;mitotic spindle	GO:0043014	alpha-tubulin binding
Tb927.7.4070:mRNA-p1	Tb927.7.4070:mRNA-p1	Tb927.7.4070	cysteine peptidase, Clan CA, family C2, putative	3.36331	3.16572	0.603487	-0.875648	0.704281	-0.72088	0.824133	-1.06223	0.131732	0.573891	0.990372	-0.896788	0.66609	-0.735939	3.02854	2.93766	0.53007	2.35596			+	+					+	+									N/A	N/A	N/A	N/A	N/A	N/A	GO:0005737;GO:0005929;GO:0031981;GO:0060170;GO:0097014	ciliary membrane;ciliary plasm;cilium;cytoplasm;nuclear lumen	N/A	N/A
Tb927.10.2260:mRNA-p1	Tb927.10.2260:mRNA-p1	Tb927.10.2260	Ubiquitin family, putative	1.9072	3.12968	0.0549603	-0.276113	0.502222	-0.99875	0.79488	-1.60397	0.968883	-1.79659	0.846313	-1.59862	0.450945	-0.939284	0.870397	-1.39939	0.795598	-1.09011																			N/A	N/A	GO:0005515;GO:0008270;GO:0061630	protein binding;ubiquitin protein ligase activity;zinc ion binding	N/A	N/A	GO:0005654;GO:0005737	cytoplasm;nucleoplasm	N/A	N/A
Tb927.5.3430:mRNA-p1	Tb927.5.3430:mRNA-p1	Tb927.5.3430	ubiquitin-activating enzyme E1, putative	1.95481	3.05026	1.00449	3.0223	0.387057	1.099	0.499057	-1.30582	1.45008	-2.40203	0.944834	-1.80427	0.177004	-0.31415	0.0383033	-0.121976	0.227906	-0.46416																			N/A	N/A	GO:0005524;GO:0008641;GO:0019948	ATP binding;SUMO activating enzyme activity;ubiquitin-like modifier activating enzyme activity	GO:0016925	protein sumoylation	GO:0005654;GO:0005737;GO:0031510	cytoplasm;nucleoplasm;SUMO activating enzyme complex	GO:0005515;GO:0008641;GO:0019948;GO:0061656	protein binding;SUMO activating enzyme activity;SUMO conjugating enzyme activity;ubiquitin-like modifier activating enzyme activity
Tb927.10.14730:mRNA-p1;Tb11.v5.1062.1-p1;Tb927.10.14615:mRNA-p1	Tb927.10.14730:mRNA-p1;Tb11.v5.1062.1-p1	Tb927.10.14730;Tb11.v5.1062	chaperone protein DnaJ, putative;chaperone protein DnaJ, putative	2.02207	3.03923	1.04525	-2.18801	0.681784	-1.45685	0.63099	-1.33007	0.811914	-1.63055	1.10695	-2.1719	1.05709	-2.23584	1.17546	-1.87847	1.58931	3.15676																			N/A	N/A	N/A	N/A	N/A	N/A	GO:0005789;N/A	endoplasmic reticulum membrane;N/A	GO:0030544;GO:0051082;N/A	Hsp70 protein binding;N/A;unfolded protein binding
Tb927.7.3080:mRNA-p1	Tb927.7.3080:mRNA-p1	Tb927.7.3080	Kinetochore interacting protein 4	2.24961	3.02842	1.83122	4.04209	3.25372	3.90339	1.82598	-1.60768	1.83557	-2.18123	2.7652	1.85491	0.124337	-0.121108	1.05761	-1.11578	1.09462	-1.18387				+		+	+	+							+	+			N/A	N/A	N/A	N/A	N/A	N/A	GO:0000776;GO:0005634;GO:0005654;GO:0005819	kinetochore;nucleoplasm;nucleus;spindle	N/A	N/A
Tb927.11.6710:mRNA-p1	Tb927.11.6710:mRNA-p1	Tb927.11.6710	predicted tetratricopeptide repeat (TPR) protein	1.76283	3.01688	0.821176	2.17287	0.559341	1.07134	0.0582266	-0.160212	1.79503	4.07128	1.43378	2.80979	0.851206	1.75853	0.513913	1.01386	1.86305	3.9248													+	+		+			N/A	N/A	GO:0005515	protein binding	N/A	N/A	N/A	N/A	N/A	N/A
Tb927.5.3250.1:mRNA-p1;Tb927.5.3250.2:mRNA-p1	Tb927.5.3250.1:mRNA-p1	Tb927.5.3250	hypothetical protein, conserved;hypothetical protein, conserved	2.9223	2.99366	0.641564	1.61466	0.0480387	0.057573	1.65056	-1.61607	1.73927	-2.50106	1.58567	-1.85922	1.33528	-1.26568	1.85396	-1.29086	0.998273	-1.42619			+	+															N/A	N/A	GO:0005515;N/A	N/A;protein binding	N/A	N/A	GO:0005634;GO:0005654	nucleoplasm;nucleus	N/A	N/A
Tb927.9.4300:mRNA-p1	Tb927.9.4300:mRNA-p1	Tb927.9.4300	PRP3, putative	2.37658	2.94529	0.400416	0.48068	1.46195	1.89741	1.14483	-1.27553	1.96316	-3.16923	1.54968	-1.72443	0.413911	-0.659823	0.0641162	-0.100998	0.0731196	0.281359				+															GO:0046540	U4/U6 x U5 tri-snRNP complex	N/A	N/A	GO:0000398	mRNA splicing, via spliceosome	GO:0005634;GO:0005654;GO:0005737;GO:0046540	cytoplasm;nucleoplasm;nucleus;U4/U6 x U5 tri-snRNP complex	N/A	N/A
Tb927.10.4570:mRNA-p1;Tb927.10.4560:mRNA-p1	Tb927.10.4570:mRNA-p1;Tb927.10.4560:mRNA-p1	Tb927.10.4570;Tb927.10.4560	elongation factor 2;elongation factor 2	2.46784	2.87867	0.176184	0.680704	1.55468	2.15577	0.890932	1.15731	2.10099	3.49893	1.59087	2.18338	1.9705	2.97633	3.01385	3.66819	2.62123	5.89002		+		+					+	+			+	+	+	+		+	N/A	N/A	GO:0003924;GO:0005525	GTP binding;GTPase activity	N/A	N/A	GO:0005737;GO:0097014;GO:1990904	ciliary plasm;cytoplasm;ribonucleoprotein complex	GO:0003729;GO:0003746;GO:0003924;GO:0005525;GO:0043022	GTP binding;GTPase activity;mRNA binding;ribosome binding;translation elongation factor activity
Tb927.8.7990:mRNA-p1	Tb927.8.7990:mRNA-p1	Tb927.8.7990	Thioredoxin-like/Protein of unknown function (DUF3638)/Protein of unknown function (DUF3645), putative	2.12662	2.87378	1.08057	-0.710785	0.58992	-0.72118	1.07489	-1.11956	1.45028	-1.50605	1.931	-1.53084	0.630233	-0.412562	2.03318	-1.28615	0.433251	0.755472																			N/A	N/A	GO:0046872	metal ion binding	N/A	N/A	GO:0005654;GO:0005737	cytoplasm;nucleoplasm	N/A	N/A
Tb927.7.4450:mRNA-p1	Tb927.7.4450:mRNA-p1	Tb927.7.4450	SUMO-interacting motif-containing protein	2.30281	2.8435	0.0996329	0.483438	1.13476	-0.501028	1.03145	-0.582034	2.56659	-1.55056	0.865541	-1.76106	2.90749	-2.02682	2.04375	-2.23993	2.23424	-1.62104				+															N/A	N/A	N/A	N/A	N/A	N/A	GO:0005634;GO:0005654;GO:0005737;GO:0005819;GO:0031981	cytoplasm;nuclear lumen;nucleoplasm;nucleus;spindle	N/A	N/A
Tb927.7.4970:mRNA-p1;Tb11.v5.0178.1-p1	Tb927.7.4970:mRNA-p1;Tb11.v5.0178.1-p1	Tb927.7.4970;Tb11.v5.0178	glutamine synthetase, putative;glutamine synthetase, putative	1.55075	2.81935	1.26907	3.04119	1.64097	2.23335	0.21889	0.345787	1.8129	2.29882	2.23848	3.03169	1.32862	1.50696	3.25704	3.24213	2.61199	4.29118		+				+			+	+			+	+	+	+			N/A	N/A	GO:0003824;GO:0004356	catalytic activity;glutamate-ammonia ligase activity	GO:0006542;GO:0006807	glutamine biosynthetic process;nitrogen compound metabolic process	GO:0005737;GO:0005739	cytoplasm;mitochondrion	GO:0004356	glutamate-ammonia ligase activity
Tb927.10.13180:mRNA-p1	Tb927.10.13180:mRNA-p1	Tb927.10.13180	Nrap protein, putative	2.04684	2.76887	0.647157	-0.980298	0.13637	0.178334	0.941876	-1.56359	0.915601	-1.21595	1.46374	-1.55476	0.02372	-0.0373077	0.66662	1.08251	0.0143592	0.0255979																			N/A	N/A	GO:0003723	RNA binding	N/A	N/A	GO:0005634;GO:0005730;GO:0032040;GO:0032545;GO:0034456	CURI complex;nucleolus;nucleus;small-subunit processome;UTP-C complex	N/A	N/A
Tb927.10.14080:mRNA-p1;Tb927.10.13570:mRNA-p1	Tb927.10.14080:mRNA-p1;Tb927.10.13570:mRNA-p1	Tb927.10.14080;Tb927.10.13570	RNA-binding protein, putative;RNA-binding protein 27, putative	3.00478	2.75728	1.58765	3.45322	2.65511	3.38638	1.11609	-0.852071	1.26138	-0.923522	2.55599	2.78053	0.0418917	-0.114228	0.0920058	0.162909	0.293828	0.753172			+	+		+		+							+	+			N/A	N/A	GO:0003676	nucleic acid binding	N/A	N/A	GO:0005634;GO:0005654	nucleoplasm;nucleus	GO:0003723	RNA binding
Tb927.10.15570:mRNA-p1	Tb927.10.15570:mRNA-p1	Tb927.10.15570	transcription factor IIa, putative	1.9592	2.69239	1.97498	4.32434	2.4046	4.64787	0.231843	-0.337725	0.673937	-1.09175	2.43208	4.64415	2.00033	3.44159	1.32712	-1.29215	0.519051	-0.614097						+		+							+	+		+	N/A	N/A	N/A	N/A	N/A	N/A	GO:0031981	nuclear lumen	N/A	N/A
Tb927.6.4600:mRNA-p1	Tb927.6.4600:mRNA-p1	Tb927.6.4600	pre-mRNA splicing factor ATP-dependent RNA helicase, putative	2.96145	2.68575	0.542031	-0.70066	1.40713	-0.957834	0.601457	-1.00168	0.837261	-1.42361	1.26117	-1.66459	0.459157	-0.318036	1.76987	-1.85914	0.731694	-0.924681			+	+															N/A	N/A	GO:0003676;GO:0004386;GO:0005524	ATP binding;helicase activity;nucleic acid binding	N/A	N/A	GO:0005634;GO:0005654;GO:0005730	nucleolus;nucleoplasm;nucleus	N/A	N/A
Tb927.1.1720:mRNA-p1	Tb927.1.1720:mRNA-p1	Tb927.1.1720	cyclophilin 15, putative	2.6501	2.65977	1.80911	-1.04107	1.11698	-0.888802	0.707464	-0.827992	1.01788	-1.03454	0.581321	-0.921051	0.310708	-0.421447	0.75831	-0.648173	1.15455	-1.46189				+															N/A	N/A	GO:0003755	peptidyl-prolyl cis-trans isomerase activity	GO:0000413	protein peptidyl-prolyl isomerization	GO:0005634	nucleus	N/A	N/A
Tb927.10.6070:mRNA-p1	Tb927.10.6070:mRNA-p1	Tb927.10.6070	universal minicircle sequence binding protein 1	1.48277	2.64548	0.587087	-1.92074	1.14867	-4.06595	1.67721	-4.49171	0.938089	-2.25103	0.984139	-2.28673	0.410847	-1.00115	1.352	2.78933	0.850271	1.4518																			N/A	N/A	GO:0003676;GO:0008270	nucleic acid binding;zinc ion binding	N/A	N/A	GO:0005730;GO:0005737;GO:0031981	cytoplasm;nuclear lumen;nucleolus	GO:0003676;GO:0003727;GO:0003729;GO:0045182	mRNA binding;nucleic acid binding;single-stranded RNA binding;translation regulator activity
Tb927.11.9040:mRNA-p1	Tb927.11.9040:mRNA-p1	Tb927.11.9040	conserved protein	1.75803	2.63393	0.355608	1.49305	0.337436	-0.35503	0.0390461	0.0742102	0.659385	-0.65573	0.318161	1.03157	0.0933916	-0.11007	3.22821	3.23252	2.11804	3.75097									+	+									N/A	N/A	GO:0003677	DNA binding	N/A	N/A	GO:0005737;GO:0031981;GO:0097014	ciliary plasm;cytoplasm;nuclear lumen	N/A	N/A
Tb927.11.11330:mRNA-p1;Tb11.v5.1035.1-p1;Tb11.v5.1034.1-p1	Tb927.11.11330:mRNA-p1;Tb11.v5.1035.1-p1	Tb927.11.11330;Tb11.v5.1035	heat shock protein 70 (hsp70), putative;heat shock protein 70	1.84113	2.63136	1.1435	2.59624	1.65434	3.55621	1.24282	2.43526	2.12132	5.2777	1.8012	4.02297	1.85852	4.20436	2.39113	3.71315	2.21079	3.61069		+							+	+			+	+	+	+		+	N/A	N/A	N/A	N/A	N/A	N/A	GO:0005737;GO:0020015;GO:0097014;N/A	ciliary plasm;cytoplasm;glycosome;N/A	GO:0016887;N/A	ATP hydrolysis activity;N/A
Tb927.11.5900:mRNA-p1	Tb927.11.5900:mRNA-p1	Tb927.11.5900	hypothetical protein, conserved	1.50059	2.60998	0.577187	1.64599	0.522096	1.17953	0.480438	-1.09342	0.614795	-1.39894	0.479483	1.2297	0.203941	-0.539885	0.859295	-1.44862	0.186354	-0.422443																			N/A	N/A	N/A	N/A	N/A	N/A	GO:0005634;GO:0005654	nucleoplasm;nucleus	N/A	N/A
Tb927.11.9510:mRNA-p1	Tb927.11.9510:mRNA-p1	Tb927.11.9510	nucleic acid binding protein, putative	2.01467	2.58851	1.37934	3.04439	1.6433	2.98831	0.926564	-1.38046	1.12889	-1.72654	0.887781	1.33975	0.12856	-0.228755	1.16288	1.23186	0.0545688	0.136241						+										+			N/A	N/A	GO:0003676;GO:0008270	nucleic acid binding;zinc ion binding	N/A	N/A	GO:0005634;GO:0005654;GO:0005737;GO:0034399	cytoplasm;nuclear periphery;nucleoplasm;nucleus	GO:0003676;GO:0003727;GO:0003729;GO:0045182	mRNA binding;nucleic acid binding;single-stranded RNA binding;translation regulator activity
Tb927.9.8520:mRNA-p1	Tb927.9.8520:mRNA-p1	Tb927.9.8520	hypothetical protein, conserved	2.6569	2.53417	0.182352	0.794463	0.228938	0.693005	1.19901	-1.15456	1.61854	-1.51164	1.00395	-0.82772	0.972085	-1.0717	2.48356	-1.60409	0.382175	0.908504				+															N/A	N/A	N/A	N/A	N/A	N/A	GO:0031981	nuclear lumen	N/A	N/A
Tb927.9.5710:mRNA-p1	Tb927.9.5710:mRNA-p1	Tb927.9.5710	general transcription factor IIB	3.27335	2.52913	0.119517	0.549112	0.148932	0.251639	2.07488	-1.64037	2.39838	-2.01251	0.26829	-0.38623	0.770415	-0.867033	0.197685	-0.403801	0.0582209	-0.186689			+	+															N/A	N/A	N/A	N/A	N/A	N/A	GO:0005634;GO:0005654;GO:0005737;GO:0031981;GO:0097014	ciliary plasm;cytoplasm;nuclear lumen;nucleoplasm;nucleus	N/A	N/A
Tb927.2.100:mRNA-p1	Tb927.2.100:mRNA-p1	Tb927.2.100	retrotransposon hot spot protein 1 (RHS1), putative	2.33494	2.52763	0.114007	0.3736	0.199349	-0.40631	1.13437	-1.05339	0.356977	-1.10024	1.22313	-2.24632	1.85694	2.04931	0.278965	0.872684	0.915454	-1.24452				+														+	N/A	N/A	N/A	N/A	N/A	N/A	GO:0005634	nucleus	N/A	N/A
Tb927.11.3380:mRNA-p1	Tb927.11.3380:mRNA-p1	Tb927.11.3380	Ran-binding protein 1, putative	1.60721	2.46208	0.211383	-0.477857	0.0722185	0.180649	0.991795	1.9903	1.4286	3.09592	0.254958	-0.586195	0.30167	-0.688748	0.0642964	-0.155045	0.302746	-0.505787														+					N/A	N/A	N/A	N/A	GO:0046907	intracellular transport	GO:0005634;GO:0005643;GO:0005737	cytoplasm;nuclear pore;nucleus	GO:0005092;GO:0005515	GDP-dissociation inhibitor activity;protein binding
Tb927.9.13920:mRNA-p1;Tb927.9.13860:mRNA-p1;Tb927.9.13820:mRNA-p1;Tb927.9.13795:mRNA-p1;Tb927.9.13785:mRNA-p1	Tb927.9.13920:mRNA-p1;Tb927.9.13860:mRNA-p1;Tb927.9.13820:mRNA-p1;Tb927.9.13795:mRNA-p1;Tb927.9.13785:mRNA-p1	Tb927.9.13920;Tb927.9.13860;Tb927.9.13820;Tb927.9.13795;Tb927.9.13785	kinetoplastid membrane protein 11-5;kinetoplastid membrane protein 11-4;kinetoplastid membrane protein 11-3;kinetoplastid membrane protein 11-2;kinetoplastid membrane protein 11-1	2.36651	2.44916	1.94289	4.92974	0.621739	1.80699	2.45759	4.40541	2.62837	6.17898	2.40798	3.68645	0.194645	0.875637	0.312021	0.823444	2.19555	4.553		+		+		+						+	+	+	+	+			GO:0005737;GO:0005874	cytoplasm;microtubule	N/A	N/A	GO:0006952;GO:0008284	defense response;positive regulation of cell population proliferation	GO:0005654;GO:0005737;GO:0005856;GO:0005929;GO:0005930;GO:0032991;GO:0036064;GO:0051286;GO:0120119;GO:0120280	axoneme;cell tip;ciliary basal body;ciliary pro-basal body;cilium;cytoplasm;cytoskeleton;flagellum attachment zone;nucleoplasm;protein-containing complex	GO:0005515;GO:0044877	protein binding;protein-containing complex binding
Tb927.4.2070:mRNA-p1;Tb11.v5.0410.1-p1	Tb927.4.2070:mRNA-p1	Tb927.4.2070	antigenic protein, putative	0.96469	2.37451	2.17526	5.74008	1.94547	4.68059	1.84318	4.36053	2.08732	5.46555	1.57364	3.43698	2.00659	4.93273	2.2587	3.60037	3.31199	7.18011	+	+				+				+			+	+	+	+		+	N/A	N/A	N/A	N/A	N/A	N/A	GO:0005737;GO:0030863	cortical cytoskeleton;cytoplasm	N/A	N/A
Tb927.7.2260:mRNA-p1	Tb927.7.2260:mRNA-p1	Tb927.7.2260	SEP domain containing protein, putative	2.07876	2.34932	0.263911	0.607846	1.20664	1.56418	1.09603	-1.49861	1.08975	1.02316	0.0752774	-0.273118	1.26727	-1.47621	1.68363	1.72512	1.4315	2.89483										+				+					N/A	N/A	N/A	N/A	N/A	N/A	GO:0005634;GO:0005654;GO:0005737;GO:0005829;GO:0097014	ciliary plasm;cytoplasm;cytosol;nucleoplasm;nucleus	GO:0043130	ubiquitin binding
Tb927.6.1270:mRNA-p1	Tb927.6.1270:mRNA-p1	Tb927.6.1270	PITH domain-containing protein	0.492932	2.3477	2.38641	4.61673	2.52267	4.67463	0.365263	2.55381	2.42754	4.49638	2.60755	5.07206	0.320277	1.61039	2.36009	4.49285	2.11586	5.56885		+				+		+	+	+			+	+	+	+			N/A	N/A	N/A	N/A	N/A	N/A	GO:0005737;GO:0031981;GO:0097014	ciliary plasm;cytoplasm;nuclear lumen	N/A	N/A
Tb927.5.840:mRNA-p1	Tb927.5.840:mRNA-p1	Tb927.5.840	Nucleolar protein 111	1.94916	2.3463	1.21792	-1.44138	0.0949217	-0.121406	0.418145	-1.2024	1.86175	-2.4092	1.57956	-2.16648	1.23428	-1.92213	1.44738	-1.69548	0.432882	-0.74386																			N/A	N/A	N/A	N/A	N/A	N/A	GO:0005634;GO:0005730;GO:0005819;GO:0030686	90S preribosome;nucleolus;nucleus;spindle	N/A	N/A
Tb927.2.1890:mRNA-p1	Tb927.2.1890:mRNA-p1	Tb927.2.1890	E2-like ubiquitin-conjugation enzyme	1.7069	2.29418	0.500424	-0.908676	0.246827	-0.583345	0.667418	-1.46328	0.578489	-1.0554	0.676554	-1.50067	0.116264	-0.245267	0.23641	0.572351	1.3422	2.41309																			N/A	N/A	N/A	N/A	N/A	N/A	GO:0000153;GO:0005737;GO:0005829;GO:0097014	ciliary plasm;cytoplasm;cytoplasmic ubiquitin ligase complex;cytosol	GO:0019776	Atg8 ligase activity
Tb927.10.12370:mRNA-p1	Tb927.10.12370:mRNA-p1	Tb927.10.12370	gamma-glutamylcysteine synthetase	2.76979	2.284	0.958068	2.19311	1.32409	1.11045	0.701013	-1.87747	1.72954	-2.45747	0.235643	-0.457047	0.443985	-0.971729	1.89968	1.14392	0.098306	0.343688				+						+									N/A	N/A	GO:0003824;GO:0004357	catalytic activity;glutamate-cysteine ligase activity	GO:0006750	glutathione biosynthetic process	GO:0005654	nucleoplasm	GO:0004357	glutamate-cysteine ligase activity
Tb927.7.5210:mRNA-p1	Tb927.7.5210:mRNA-p1	Tb927.7.5210	Putative Phosphatase/Protein of unknown function DUF89, putative	1.68684	2.28052	0.123204	0.3088	0.214642	0.482831	0.27872	-1.06154	0.802896	1.54725	0.416402	-0.804369	0.0787855	-0.32482	1.15134	1.5646	1.50587	2.6175														+					N/A	N/A	GO:0016791	phosphatase activity	N/A	N/A	GO:0005737;GO:0097014	ciliary plasm;cytoplasm	GO:0016791	phosphatase activity
Tb927.11.11770:mRNA-p1	Tb927.11.11770:mRNA-p1	Tb927.11.11770	Eukaryotic translation initiation factor 4E-3	1.82639	2.2347	0.422237	-1.01934	0.301819	-0.536557	0.583941	-1.78415	0.0120482	-0.0600516	0.0467701	-0.227646	0.0810675	-0.254947	0.25886	0.90766	2.18806	5.16424		+																	N/A	N/A	GO:0003723;GO:0003743	RNA binding;translation initiation factor activity	GO:0006413	translational initiation	GO:0005737;GO:0005844;GO:0010494;GO:0016281	cytoplasm;cytoplasmic stress granule;eukaryotic translation initiation factor 4F complex;polysome	GO:0000339;GO:0000340;GO:0000342;GO:0003723;GO:0003743	RNA 7-methylguanosine cap binding;RNA binding;RNA cap 4 binding;RNA cap binding;translation initiation factor activity
Tb927.3.1030:mRNA-p1	Tb927.3.1030:mRNA-p1	Tb927.3.1030	RNA-binding protein	2.94647	2.22707	0.156055	-0.513624	0.746216	-0.29002	1.56416	-1.67128	1.24657	0.522856	1.45083	0.617808	0.107471	-0.13951	2.9148	1.59644	1.79333	4.52972				+					+	+				+		+			N/A	N/A	GO:0003676	nucleic acid binding	N/A	N/A	GO:0005737	cytoplasm	GO:0003729	mRNA binding
Tb927.6.890:mRNA-p1	Tb927.6.890:mRNA-p1	Tb927.6.890	hypothetical protein, conserved	2.68223	2.20278	2.63924	4.90664	2.24442	1.54502	0.661088	-1.00154	0.647311	-1.09689	4.34589	5.54382	3.19846	3.20841	1.7927	-1.22531	2.07413	-1.51529				+	+	+									+	+	+	+	N/A	N/A	N/A	N/A	N/A	N/A	GO:0005634;GO:0005643	nuclear pore;nucleus	N/A	N/A
Tb927.10.9160:mRNA-p1	Tb927.10.9160:mRNA-p1	Tb927.10.9160	Cyclin 12, L-type	1.53211	2.19588	0.249064	-0.947899	0.470736	0.884938	1.08591	-2.11531	1.62404	-3.47678	1.11806	-2.15239	1.15224	-2.3916	0.135915	0.546271	0.103101	-0.389671																			N/A	N/A	GO:0016538	cyclin-dependent protein serine/threonine kinase regulator activity	GO:0006357	regulation of transcription by RNA polymerase II	GO:0005634;GO:0005654	nucleoplasm;nucleus	GO:0016538;GO:0044877	cyclin-dependent protein serine/threonine kinase regulator activity;protein-containing complex binding
Tb927.10.540:mRNA-p1;Tb11.v5.0414.1-p1	Tb927.10.540:mRNA-p1;Tb11.v5.0414.1-p1	Tb927.10.540;Tb11.v5.0414	ATP-dependent DEAD/H RNA helicase, putative;ATP-dependent RNA helicase SUB2, putative	1.08575	2.11503	0.119918	0.549166	0.0889832	0.209669	0.547948	-1.04422	0.96546	-1.81949	0.422848	-0.826933	0.109871	-0.281467	0.702665	-1.17745	0.128371	0.324846																			N/A	N/A	GO:0003676;GO:0004386;GO:0005524	ATP binding;helicase activity;nucleic acid binding	N/A	N/A	GO:0005634;GO:0005654	nucleoplasm;nucleus	GO:0000993;GO:0001042;GO:0003723;GO:0003724;GO:0003729;GO:0004386;GO:0005524	ATP binding;helicase activity;mRNA binding;RNA binding;RNA helicase activity;RNA polymerase I core binding;RNA polymerase II complex binding
Tb927.1.220:mRNA-p1;Tb927.2.370:mRNA-p1	Tb927.1.220:mRNA-p1;Tb927.2.370:mRNA-p1	Tb927.1.220;Tb927.2.370	retrotransposon hot spot protein 1 (RHS1), putative;retrotransposon hot spot protein 1 (RHS1), putative	1.76122	2.10328	1.20715	2.25034	0.0816196	0.28357	0.581389	-1.28103	0.30524	0.562887	0.510036	0.99615	1.19951	1.99539	0.118985	-0.400105	0.0448677	-0.116577																			N/A	N/A	N/A	N/A	N/A	N/A	GO:0005634;GO:0005654	nucleoplasm;nucleus	N/A	N/A
Tb927.10.13220:mRNA-p1	Tb927.10.13220:mRNA-p1	Tb927.10.13220	cyclophilin type peptidyl-prolyl cis-trans isomerase, putative	1.7233	2.0864	1.11669	1.96893	1.19374	1.69241	0.874386	-1.56583	1.50141	-2.00255	1.28472	-1.61652	1.54964	-2.00173	0.822414	-1.39548	0.311887	-0.480827																			N/A	N/A	GO:0003755	peptidyl-prolyl cis-trans isomerase activity	GO:0000413;GO:0006457	protein folding;protein peptidyl-prolyl isomerization	GO:0005654	nucleoplasm	GO:0003755	peptidyl-prolyl cis-trans isomerase activity
Tb927.9.15030:mRNA-p1	Tb927.9.15030:mRNA-p1	Tb927.9.15030	DNA polymerase epsilon subunit B, putative	1.72904	2.07326	0.274783	1.03015	0.0537848	-0.152674	1.16834	-1.32775	1.72929	-2.36343	0.876746	-0.971679	0.934352	-1.41004	0.173973	0.478547	0.15837	0.446781																			GO:0008622	epsilon DNA polymerase complex	GO:0003677;GO:0016779	DNA binding;nucleotidyltransferase activity	GO:0006260;GO:0006261	DNA replication;DNA-dependent DNA replication	GO:0005634;GO:0005654;GO:0005737;GO:0008622	cytoplasm;epsilon DNA polymerase complex;nucleoplasm;nucleus	GO:0003887	DNA-directed DNA polymerase activity
Tb927.11.980:mRNA-p1	Tb927.11.980:mRNA-p1	Tb927.11.980	Nucleoporin NUP158	1.67828	2.05126	0.690387	-0.946821	0.457807	-0.564742	3.38657	7.35227	3.31996	7.70522	3.55655	8.3025	3.57544	8.40047	4.02342	5.67231	1.32998	-1.25266									+	+	+	+	+	+	+	+	+	+	GO:0005643	nuclear pore	GO:0017056	structural constituent of nuclear pore	GO:0006913;GO:0051028	mRNA transport;nucleocytoplasmic transport	GO:0005634;GO:0005643;GO:0031080;GO:0044614	nuclear pore;nuclear pore cytoplasmic filaments;nuclear pore outer ring;nucleus	GO:0017056	structural constituent of nuclear pore
Tb927.7.1860:mRNA-p1;Tb927.7.1820:mRNA-p1	Tb927.7.1860:mRNA-p1;Tb927.7.1820:mRNA-p1	Tb927.7.1860;Tb927.7.1820	hypothetical protein, conserved;hypothetical protein, conserved	0.876843	2.03957	1.39759	-4.4388	1.37792	-4.70144	1.34644	-4.45321	1.57113	-5.36743	1.40934	-4.53681	1.55299	-5.27006	1.05866	2.2448	0.436951	1.02873																			N/A	N/A	N/A	N/A	N/A	N/A	GO:0005634;GO:0005730	nucleolus;nucleus	N/A	N/A
Tb927.9.11050:mRNA-p1	Tb927.9.11050:mRNA-p1	Tb927.9.11050	4E-interacting protein, putative	2.87124	2.03137	0.224087	-0.428738	0.326883	-0.553077	1.04467	-0.781199	1.82549	1.37484	0.110423	0.251897	1.7528	1.38599	2.73465	2.17509	1.73449	4.38234				+					+	+			+	+				+	N/A	N/A	N/A	N/A	N/A	N/A	GO:0005737	cytoplasm	GO:0003729;GO:0045182	mRNA binding;translation regulator activity
Tb927.7.1110:mRNA-p1	Tb927.7.1110:mRNA-p1	Tb927.7.1110	asparagine synthetase a, putative	1.44311	1.97487	0.0659115	0.20312	0.152638	-0.460821	0.155562	-0.350165	0.151908	-0.620653	0.533971	-1.65627	0.711067	-1.35032	1.87076	2.69206	1.76741	2.95737										+									GO:0005737	cytoplasm	GO:0004071	aspartate-ammonia ligase activity	GO:0006529	asparagine biosynthetic process	GO:0005737;GO:0005829;GO:0097014	ciliary plasm;cytoplasm;cytosol	GO:0004071	aspartate-ammonia ligase activity
Tb927.11.16230:mRNA-p1	Tb927.11.16230:mRNA-p1	Tb927.11.16230	hypothetical protein, conserved	1.47034	1.96563	0.0191412	0.138848	0.931556	2.41828	0.505906	-0.914035	1.58723	-1.56757	1.77662	-1.36996	0.662946	-0.751352	2.26316	-1.62111	0.556167	-0.830313																			N/A	N/A	GO:0005515	protein binding	N/A	N/A	GO:0005634;GO:0005654;GO:0005737	cytoplasm;nucleoplasm;nucleus	GO:0003729	mRNA binding
Tb927.1.640:mRNA-p1	Tb927.1.640:mRNA-p1	Tb927.1.640	BRCA2	1.28702	1.94069	0.111039	0.53834	0.0668963	0.275874	0.965428	-2.38096	1.05058	-1.80571	0.806884	-1.76733	0.284836	-0.625935	1.10451	-1.92424	0.836878	1.43438																			N/A	N/A	N/A	N/A	GO:0000724;GO:0006281	DNA repair;double-strand break repair via homologous recombination	GO:0005634;GO:0005654	nucleoplasm;nucleus	GO:0003684	damaged DNA binding
Tb927.9.12650:mRNA-p1;Tb11.v5.0675.1-p1	Tb927.9.12650:mRNA-p1	Tb927.9.12650	ubiquitin-activating enzyme E1, putative	1.61245	1.87739	0.0288436	0.14181	0.232409	-0.370894	0.961888	-1.39372	0.0974506	0.301291	1.16569	-1.74354	0.428096	-0.78933	0.437258	0.559134	1.06454	2.54883																			N/A	N/A	GO:0008641	ubiquitin-like modifier activating enzyme activity	GO:0006464	cellular protein modification process	GO:0005634;GO:0005654;GO:0005730;GO:0005737;GO:0005739;GO:0051286;GO:0097014	cell tip;ciliary plasm;cytoplasm;mitochondrion;nucleolus;nucleoplasm;nucleus	GO:0004839;GO:0004842	ubiquitin activating enzyme activity;ubiquitin-protein transferase activity
Tb927.8.760:mRNA-p1	Tb927.8.760:mRNA-p1	Tb927.8.760	nucleolar RNA-binding protein	0.45437	1.85662	0.0715512	0.354644	1.24196	-0.973124	0.912841	-1.19484	1.70433	-2.05995	1.38762	-2.25706	1.17509	-1.36443	1.24898	-1.89624	1.80519	-1.28																			N/A	N/A	N/A	N/A	N/A	N/A	GO:0005634;GO:0005730;GO:0030687	nucleolus;nucleus;preribosome, large subunit precursor	GO:0003676;GO:0003723;GO:0004712;GO:0005515;GO:0019843	nucleic acid binding;protein binding;protein serine/threonine/tyrosine kinase activity;RNA binding;rRNA binding
Tb927.6.3650:mRNA-p1	Tb927.6.3650:mRNA-p1	Tb927.6.3650	ADP-ribosylation factor-like protein 3C, putative	1.7167	1.82076	0.119621	0.427388	0.949113	-1.23646	0.535275	-0.933342	1.2317	1.8067	0.99923	1.54206	1.57158	2.26059	1.88736	1.90311	1.31012	2.63627										+				+		+		+	N/A	N/A	GO:0005525	GTP binding	N/A	N/A	GO:0005737;GO:0005794;GO:0031981;GO:0036064;GO:0097014	ciliary basal body;ciliary plasm;cytoplasm;Golgi apparatus;nuclear lumen	GO:0005515;GO:0005525	GTP binding;protein binding
Tb927.8.7490:mRNA-p1	Tb927.8.7490:mRNA-p1	Tb927.8.7490	symplekin	1.7881	1.81987	1.33747	3.42784	1.75548	2.60887	1.37114	-1.55696	1.82419	-1.98682	1.52084	-1.72678	1.72066	-2.17944	1.6587	-1.46792	0.277517	-0.557597						+													N/A	N/A	N/A	N/A	N/A	N/A	GO:0005634;GO:0005654;GO:0005847	mRNA cleavage and polyadenylation specificity factor complex;nucleoplasm;nucleus	N/A	N/A
Tb927.9.12900:mRNA-p1	Tb927.9.12900:mRNA-p1	Tb927.9.12900	RNA polymerase-associated protein LEO1, putative	1.29073	1.81689	1.24322	2.57529	0.905339	1.62395	0.245378	-0.478959	1.03565	-1.82878	0.0104255	0.039587	0.0967163	-0.23872	0.745623	-0.963619	0.366811	-0.547755																			GO:0016593	Cdc73/Paf1 complex	N/A	N/A	GO:0006368;GO:0016570	histone modification;transcription elongation from RNA polymerase II promoter	GO:0005634;GO:0005654;GO:0005737;GO:0016593	Cdc73/Paf1 complex;cytoplasm;nucleoplasm;nucleus	GO:0003723;GO:1990269	RNA binding;RNA polymerase II C-terminal domain phosphoserine binding
Tb927.7.6740:mRNA-p1	Tb927.7.6740:mRNA-p1	Tb927.7.6740	ATPase family associated with various cellular activities (AAA), putative	1.73949	1.7913	0.525801	1.1951	1.0327	0.928287	0.600256	-0.805505	0.917129	-1.92905	0.685667	-0.612873	0.449304	-0.564809	1.47315	-1.7321	1.5258	-1.29907																			N/A	N/A	GO:0005524;GO:0016887	ATP binding;ATP hydrolysis activity	N/A	N/A	GO:0005634;GO:0005654;GO:0005737	cytoplasm;nucleoplasm;nucleus	GO:0003677;GO:0005524	ATP binding;DNA binding
Tb927.10.3110:mRNA-p1	Tb927.10.3110:mRNA-p1	Tb927.10.3110	DNA primase large subunit, putative	2.17976	1.774	1.02588	2.15358	2.86754	4.59343	1.16097	-1.29964	1.79169	-1.86411	0.653996	0.648834	1.94137	2.12326	0.935248	-1.5876	0.270316	0.457568							+	+										+	N/A	N/A	GO:0003677;GO:0046872;GO:0051539	4 iron, 4 sulfur cluster binding;DNA binding;metal ion binding	GO:0006269	DNA replication, synthesis of RNA primer	GO:0005634;GO:0005654;GO:0005658;GO:0005739	alpha DNA polymerase:primase complex;mitochondrion;nucleoplasm;nucleus	GO:0003896	DNA primase activity
Tb927.6.2330:mRNA-p1;Tb927.6.2270:mRNA-p1	Tb927.6.2330:mRNA-p1;Tb927.6.2270:mRNA-p1	Tb927.6.2330;Tb927.6.2270	AdoMet dependent proline di-methyltransferase, putative;RGG protein	0.699236	1.74352	0.305824	1.32049	0.24723	0.972421	0.917547	-1.45563	1.50706	2.61408	1.73181	3.10987	1.17305	1.87478	2.13355	2.62698	0.599589	2.75248										+			+	+	+	+			N/A	N/A	GO:0008168	methyltransferase activity	GO:0006480	N-terminal protein amino acid methylation	GO:0005737;GO:0031981;GO:0097014	ciliary plasm;cytoplasm;nuclear lumen	GO:0005515;GO:0008168	methyltransferase activity;protein binding
Tb927.10.2730:mRNA-p1	Tb927.10.2730:mRNA-p1	Tb927.10.2730	START domain containing protein, putative	1.62733	1.72022	0.0924906	0.402736	0.0149581	0.0218563	0.438541	-1.13677	0.0459703	-0.191983	0.931057	-1.55495	0.0808636	-0.168406	0.290169	0.692499	1.37131	3.10684																			N/A	N/A	GO:0008289	lipid binding	N/A	N/A	GO:0005737;GO:0031981;GO:0097014	ciliary plasm;cytoplasm;nuclear lumen	N/A	N/A
Tb927.9.13340:mRNA-p1	Tb927.9.13340:mRNA-p1	Tb927.9.13340	Nop53 (60S ribosomal biogenesis), putative	1.95919	1.70905	1.70647	-2.31618	1.64627	-2.19165	0.877083	-1.42732	1.26059	-1.96394	1.40821	-1.83316	0.990262	-1.68004	1.22025	1.38367	0.105903	-0.249441																			GO:0005654	nucleoplasm	N/A	N/A	N/A	N/A	GO:0005634;GO:0005730;GO:0005739	mitochondrion;nucleolus;nucleus	GO:0008097	5S rRNA binding
Tb927.4.2000:mRNA-p1	Tb927.4.2000:mRNA-p1	Tb927.4.2000	ruvB-like DNA helicase, putative	2.26447	1.68998	0.239175	0.905831	0.890212	0.96428	1.16445	-1.6693	1.36899	1.72997	1.29117	1.46405	1.6018	1.30862	0.0282434	0.0646261	1.00407	2.72927														+		+			GO:0031011;GO:0035267;GO:0097255	Ino80 complex;NuA4 histone acetyltransferase complex;R2TP complex	GO:0003678;GO:0005524;GO:0043139	5'-3' DNA helicase activity;ATP binding;DNA helicase activity	N/A	N/A	GO:0000812;GO:0005634;GO:0005654;GO:0005737;GO:0031011;GO:0035267;GO:0097255	cytoplasm;Ino80 complex;NuA4 histone acetyltransferase complex;nucleoplasm;nucleus;R2TP complex;Swr1 complex	GO:0003678	DNA helicase activity
Tb927.2.4510:mRNA-p1	Tb927.2.4510:mRNA-p1	Tb927.2.4510	cdc2-related kinase 9	1.72309	1.68923	0.172608	0.586364	0.59031	1.17504	1.50708	-2.16041	1.5197	-2.27883	0.774049	-1.0959	1.38188	-1.92705	1.10422	-1.39369	0.945322	-1.46326																			N/A	N/A	GO:0004672;GO:0005524	ATP binding;protein kinase activity	GO:0006468	protein phosphorylation	GO:0005634;GO:0005654;GO:0016592	mediator complex;nucleoplasm;nucleus	GO:0004672;GO:0004693;GO:0005524;GO:0008353;GO:0044877	ATP binding;cyclin-dependent protein serine/threonine kinase activity;protein kinase activity;protein-containing complex binding;RNA polymerase II CTD heptapeptide repeat kinase activity
Tb927.11.7600:mRNA-p1	Tb927.11.7600:mRNA-p1	Tb927.11.7600	hypothetical protein, conserved	1.787	1.67117	0.249142	-0.531304	1.00492	-1.06234	1.47182	-1.73081	0.11741	0.291229	0.061903	0.10673	1.14849	-1.22511	0.17251	-0.633773	1.95938	3.3106																			N/A	N/A	N/A	N/A	N/A	N/A	GO:0005737;GO:0005819;GO:0005856;GO:0005929;GO:0030863;GO:0031981;GO:0051286;GO:0097014	cell tip;ciliary plasm;cilium;cortical cytoskeleton;cytoplasm;cytoskeleton;nuclear lumen;spindle	N/A	N/A
Tb927.3.3670:mRNA-p1	Tb927.3.3670:mRNA-p1	Tb927.3.3670	Triple RNA binding domain protein 3	1.72493	1.66707	1.73023	-2.46263	1.46221	-1.83613	0.882138	-1.50652	1.63507	-2.20734	1.22159	-2.21898	1.23274	-1.58629	0.362869	-0.629967	1.12141	-1.34516																			N/A	N/A	GO:0003676	nucleic acid binding	N/A	N/A	GO:0005634;GO:0005730	nucleolus;nucleus	GO:0003723;GO:0033592;GO:0034057;GO:0043024	ribosomal small subunit binding;RNA binding;RNA strand annealing activity;RNA strand-exchange activity
Tb927.10.11750:mRNA-p1	Tb927.10.11750:mRNA-p1	Tb927.10.11750	hypothetical protein, conserved	0.504357	1.62053	2.18199	4.25402	2.58207	4.0737	0.0670054	-0.12941	2.12733	3.1211	2.53209	3.84159	2.14863	2.77655	0.368283	-0.626269	2.42255	3.92453		+				+		+					+	+	+	+		+	N/A	N/A	N/A	N/A	N/A	N/A	N/A	N/A	N/A	N/A
Tb927.11.13007:mRNA-p1;Tb927.11.13003:mRNA-p1;Tb11.v5.0537.1-p1;Tb927.11.9920:mRNA-p1;Tb11.01.1680.v5.1-p1	Tb927.11.13007:mRNA-p1;Tb927.11.13003:mRNA-p1;Tb11.v5.0537.1-p1;Tb927.11.9920:mRNA-p1;Tb11.01.1680.v5.1-p1	Tb927.11.13007;Tb927.11.13003;Tb11.v5.0537;Tb927.11.9920;Tb11.01.1680.v5	polyubiquitin, putative;polyubiquitin, putative;ubiquitin-60S ribosomal protein L40;ubiquitin-60S ribosomal protein L40;polyubiquitin, putative	1.02647	1.5965	0.352892	-1.51526	0.551261	1.10312	0.255076	-0.667705	0.653807	1.23142	0.158396	-0.827992	0.683307	1.33779	1.27512	1.7267	0.768662	1.08305																			GO:0005840;N/A	N/A;ribosome	GO:0003735;GO:0005515	protein binding;structural constituent of ribosome	GO:0006412;N/A	N/A;translation	GO:0005634;GO:0005737;GO:0030133;GO:0031981;GO:0097014;GO:0120118;N/A	ciliary plasm;cytoplasm;flagella connector;N/A;nuclear lumen;nucleus;transport vesicle	GO:0031386;GO:0031625;N/A	N/A;protein tag;ubiquitin protein ligase binding
Tb927.3.5620:mRNA-p1	Tb927.3.5620:mRNA-p1	Tb927.3.5620	Facilitates chromatin transcription complex subunit spt16	1.38429	1.57423	0.274559	-0.887257	0.749557	-1.61652	1.79506	-2.04889	1.30362	-2.00502	0.772132	-0.864102	0.732936	-1.35474	1.85608	-1.4368	0.294454	-0.707273																			GO:0035101	FACT complex	N/A	N/A	N/A	N/A	GO:0005634;GO:0005654	nucleoplasm;nucleus	N/A	N/A
Tb927.7.5460:mRNA-p1	Tb927.7.5460:mRNA-p1	Tb927.7.5460	exosome-associated protein 3	0.635529	1.56957	0.233464	0.976381	0.0905363	0.278991	0.282322	-0.397463	1.12346	-1.3733	1.37076	-1.90302	0.75139	-0.871904	1.36103	-1.50259	0.791584	-1.41036																			N/A	N/A	N/A	N/A	N/A	N/A	GO:0005634;GO:0005654	nucleoplasm;nucleus	N/A	N/A
Tb927.10.3280:mRNA-p1	Tb927.10.3280:mRNA-p1	Tb927.10.3280	60S ribosomal proteins L38, putative	0.372914	1.56451	0.661017	-3.65901	0.766926	-4.17679	0.885672	-4.68824	0.785221	-4.1735	0.842157	-4.5612	0.742526	-3.92697	0.836276	3.20782	0.124496	0.638152																			GO:0005840	ribosome	GO:0003735	structural constituent of ribosome	GO:0006412	translation	GO:0005737;GO:0005840;GO:0022625;GO:0031981;GO:0097014	ciliary plasm;cytoplasm;cytosolic large ribosomal subunit;nuclear lumen;ribosome	GO:0003735	structural constituent of ribosome
Tb927.10.4890:mRNA-p1	Tb927.10.4890:mRNA-p1	Tb927.10.4890	zinc-finger of a C2HC-type, putative	0.500475	1.56366	1.44967	-1.90549	1.3275	-1.32409	1.24259	-1.27679	2.00276	-2.38723	1.93793	-2.19655	1.20574	-1.09843	2.89249	3.01551	0.0799523	0.290674									+	+									N/A	N/A	N/A	N/A	N/A	N/A	GO:0005737;GO:0005929;GO:0036064	ciliary basal body;cilium;cytoplasm	N/A	N/A
Tb927.10.9740:mRNA-p1	Tb927.10.9740:mRNA-p1	Tb927.10.9740	Regulatory particle triple-A ATPase subunit 6	1.95297	1.50069	0.0503437	0.212237	2.32079	2.34673	1.26565	-1.06014	0.0749413	-0.0922461	2.43541	1.74072	1.84907	1.06682	0.76358	-0.56715	0.253168	-0.385633								+							+	+		+	GO:0005737	cytoplasm	GO:0005524;GO:0016787;GO:0016887;GO:0036402	ATP binding;ATP hydrolysis activity;hydrolase activity;proteasome-activating activity	GO:0030163	protein catabolic process	GO:0005654;GO:0005737;GO:0005838	cytoplasm;nucleoplasm;proteasome regulatory particle	GO:0016887	ATP hydrolysis activity
Tb927.8.5510:mRNA-p1	Tb927.8.5510:mRNA-p1	Tb927.8.5510	apurinic/apyrimidinic endonuclease, putative	0.791673	1.49827	0.271169	1.08062	0.592939	-0.86601	0.349187	-0.506072	0.797683	-1.17037	1.23933	-1.75589	0.849991	-1.12895	1.15642	-1.60653	0.347708	-0.486782																			N/A	N/A	GO:0004518;GO:0004519;GO:0016829;GO:0046872	endonuclease activity;lyase activity;metal ion binding;nuclease activity	GO:0006281	DNA repair	GO:0005634;GO:0031981	nuclear lumen;nucleus	GO:0003906;GO:0004528;GO:0008311	DNA-(apurinic or apyrimidinic site) endonuclease activity;double-stranded DNA 3'-5' exodeoxyribonuclease activity;phosphodiesterase I activity
Tb927.7.880:mRNA-p1	Tb927.7.880:mRNA-p1	Tb927.7.880	RNA-binding protein, putative	0.324863	1.49722	0.143036	0.934266	1.78767	2.9673	0.923204	-1.43051	1.39481	-2.15295	1.27663	-2.29203	0.76336	-1.23745	1.34427	-1.72641	0.337671	-0.425691																			N/A	N/A	GO:0003676	nucleic acid binding	N/A	N/A	GO:0005634;GO:0005654;GO:0005829	cytosol;nucleoplasm;nucleus	GO:0003723;GO:0003729	mRNA binding;RNA binding
Tb927.11.16540:mRNA-p1	Tb927.11.16540:mRNA-p1	Tb927.11.16540	Roadblock/LC7 domain containing protein, putative	0.375721	1.49389	0.213651	1.30907	1.61741	-1.10248	1.26723	-0.828759	2.84389	3.17496	2.88513	3.15842	0.155686	-0.209735	3.82617	3.69883	1.96191	4.10905									+	+			+	+	+	+			GO:0005868;GO:0005874	cytoplasmic dynein complex;microtubule	GO:0003774	cytoskeletal motor activity	GO:0007018	microtubule-based movement	GO:0005737;GO:0005868;GO:0005930	axoneme;cytoplasm;cytoplasmic dynein complex	GO:0045505	dynein intermediate chain binding
Tb927.1.3950:mRNA-p1	Tb927.1.3950:mRNA-p1	Tb927.1.3950	alanine aminotransferase	1.22894	1.47618	0.069839	0.325336	0.384132	0.694308	0.603789	-0.825072	0.0111711	0.0538867	1.06719	1.33726	0.0898562	0.221955	2.29809	2.23799	1.6167	3.87237										+						+			N/A	N/A	GO:0003824;GO:0030170	catalytic activity;pyridoxal phosphate binding	GO:0009058	biosynthetic process	GO:0005737;GO:0005739;GO:0005829;GO:0020023;GO:0097014	ciliary plasm;cytoplasm;cytosol;kinetoplast;mitochondrion	GO:0004021	L-alanine:2-oxoglutarate aminotransferase activity
Tb927.11.11850:mRNA-p1	Tb927.11.11850:mRNA-p1	Tb927.11.11850	splicing factor 3B subunit 1, putative	1.36145	1.45026	0.809706	-0.456748	1.84616	-1.25522	1.08179	-1.05718	2.67636	-2.65585	1.12301	-1.13412	0.805304	-0.647981	0.98557	-1.03625	1.03572	-0.866436																			N/A	N/A	GO:0003729;GO:0005515	mRNA binding;protein binding	GO:0000245	spliceosomal complex assembly	GO:0005634;GO:0005654;GO:0005686;GO:0030133;GO:0071004;GO:0071013	catalytic step 2 spliceosome;nucleoplasm;nucleus;transport vesicle;U2 snRNP;U2-type prespliceosome	GO:0003729	mRNA binding
Tb927.11.6620:mRNA-p1	Tb927.11.6620:mRNA-p1	Tb927.11.6620	Nucleolar protein 47	0.546008	1.44879	0.562323	1.5932	1.16066	1.93881	0.601017	-1.04045	1.0158	-1.76868	0.702334	-1.37169	0.488631	-0.809364	0.462369	-1.01564	0.743141	-0.892557																			N/A	N/A	GO:0003676;GO:0008270	nucleic acid binding;zinc ion binding	N/A	N/A	GO:0005634;GO:0005730;GO:0005819;GO:0031981	nuclear lumen;nucleolus;nucleus;spindle	GO:0003676	nucleic acid binding
Tb927.4.3060:mRNA-p1	Tb927.4.3060:mRNA-p1	Tb927.4.3060	hypothetical protein, conserved	0.455832	1.40645	0.604485	-3.13934	0.928953	-3.67978	0.929942	-4.1308	1.24521	-5.08746	1.28234	-5.53462	0.957419	-3.78707	0.166874	-0.969911	0.442954	-2.17507																			N/A	N/A	N/A	N/A	N/A	N/A	GO:0005654	nucleoplasm	N/A	N/A
Tb927.8.4500:mRNA-p1;Tb11.v5.0763.1-p1	Tb927.8.4500:mRNA-p1;Tb11.v5.0763.1-p1	Tb927.8.4500;Tb11.v5.0763	Eukaryotic translation initiation factor 4 gamma 5, putative;Eukaryotic translation initiation factor 4 gamma 5	1.47079	1.39326	0.74337	-0.875127	0.150547	-0.215488	0.142961	-0.376483	0.548104	1.09121	0.0712108	-0.104639	0.497502	-0.612462	2.05107	2.0585	2.05282	4.96284										+									N/A	N/A	GO:0003723;GO:0005515	protein binding;RNA binding	N/A	N/A	GO:0005737;GO:0016281;N/A	cytoplasm;eukaryotic translation initiation factor 4F complex;N/A	GO:0003723;GO:0003729;GO:0003743;GO:0005515;N/A	mRNA binding;N/A;protein binding;RNA binding;translation initiation factor activity
Tb927.2.6090:mRNA-p1;Tb927.11.3230:mRNA-p1	Tb927.2.6090:mRNA-p1;Tb927.11.3230:mRNA-p1	Tb927.2.6090;Tb927.11.3230	60S ribosomal protein L44;60S ribosomal protein L44	0.426995	1.36676	0.162639	-0.790316	0.93252	-3.89799	0.061055	-0.324896	0.435672	-2.29862	0.275408	-1.28479	0.888243	-3.73572	0.648217	2.03176	0.510877	-2.07657																			GO:0005840	ribosome	GO:0003735	structural constituent of ribosome	GO:0006412	translation	GO:0005730;GO:0005737;GO:0005840;GO:0022625	cytoplasm;cytosolic large ribosomal subunit;nucleolus;ribosome	GO:0003735	structural constituent of ribosome
Tb927.8.3980:mRNA-p1	Tb927.8.3980:mRNA-p1	Tb927.8.3980	chromatin assembly factor 1 subunit A	1.08878	1.36289	1.1168	-1.25906	1.41729	-1.70587	1.22791	-1.424	1.85702	-2.22446	1.10077	-1.31484	1.08193	-1.43443	1.88109	-1.48492	0.764719	-1.15692																			N/A	N/A	N/A	N/A	N/A	N/A	GO:0005634	nucleus	N/A	N/A
Tb927.4.4200:mRNA-p1	Tb927.4.4200:mRNA-p1	Tb927.4.4200	hypothetical protein, conserved	0.597539	1.30707	0.315001	1.3554	0.0397617	0.0456397	0.879017	-0.83316	1.4389	-1.858	0.0350332	0.0605952	0.169421	0.219744	0.381502	-0.681899	0.269193	-0.357949																			N/A	N/A	N/A	N/A	N/A	N/A	GO:0005654;GO:0005737	cytoplasm;nucleoplasm	N/A	N/A
Tb927.7.3820:mRNA-p1	Tb927.7.3820:mRNA-p1	Tb927.7.3820	hypothetical protein, conserved	1.54048	1.29881	0.221421	-0.635487	0.723116	-0.71171	0.728149	-0.671885	0.0202562	0.0572529	0.326729	-0.810588	0.34306	0.347453	1.79223	1.43409	1.53598	3.34647										+									N/A	N/A	GO:0005515	protein binding	N/A	N/A	GO:0005737;GO:0005858;GO:0097014	axonemal dynein complex;ciliary plasm;cytoplasm	GO:0045503;GO:0045504	dynein heavy chain binding;dynein light chain binding
Tb927.11.13380:mRNA-p1	Tb927.11.13380:mRNA-p1	Tb927.11.13380	VSG Exclusion Protein 2	1.36668	1.29847	0.712569	-0.99836	0.123215	-0.236153	0.439903	-0.857557	0.942298	-1.36441	0.520046	-0.95487	0.485951	-0.677842	0.0924785	-0.223544	0.468596	-0.581502																			N/A	N/A	GO:0004386	helicase activity	N/A	N/A	GO:0005634;GO:0005654	nucleoplasm;nucleus	N/A	N/A
Tb927.11.5200:mRNA-p1	Tb927.11.5200:mRNA-p1	Tb927.11.5200	hypothetical protein, conserved	0.614315	1.29719	0.9924	1.54692	1.77607	2.20273	1.41465	-1.71462	1.10072	-1.78668	0.168275	0.512531	1.22438	-1.31803	1.63878	-1.61926	1.38754	-1.52145																			N/A	N/A	N/A	N/A	N/A	N/A	GO:0005634;GO:0005654;GO:0005730;GO:0031981	nuclear lumen;nucleolus;nucleoplasm;nucleus	N/A	N/A
Tb927.10.8940:mRNA-p1	Tb927.10.8940:mRNA-p1	Tb927.10.8940	flagellum targeting protein kharon1, putative	0.408234	1.29303	0.0960359	-0.561834	0.225221	-1.05908	0.342696	-1.48626	0.0598485	0.307111	0.0171935	-0.0919657	0.192796	0.902459	0.626699	1.9964	0.0856305	0.328697																			N/A	N/A	N/A	N/A	N/A	N/A	GO:0020016;GO:0030863	ciliary pocket;cortical cytoskeleton	GO:0003729;GO:0044877	mRNA binding;protein-containing complex binding
Tb927.9.3400:mRNA-p1	Tb927.9.3400:mRNA-p1	Tb927.9.3400	endo-beta-N-acetylglucosaminidase, putative	0.62555	1.27771	0.430988	-1.10657	0.0823132	-0.210342	0.703792	-1.54644	0.382111	-0.848268	0.735531	-1.59644	0.337562	-0.745016	0.323141	0.678566	1.50389	2.77151																			GO:0005737	cytoplasm	GO:0033925	mannosyl-glycoprotein endo-beta-N-acetylglucosaminidase activity	N/A	N/A	GO:0005737;GO:0005929;GO:0036064;GO:0097014	ciliary basal body;ciliary plasm;cilium;cytoplasm	GO:0016798	hydrolase activity, acting on glycosyl bonds
Tb927.3.3840:mRNA-p1	Tb927.3.3840:mRNA-p1	Tb927.3.3840	Family of unknown function (DUF572), putative	0.65499	1.24086	0.171245	0.62055	0.132173	0.467651	1.11986	-2.2875	0.619379	-1.31523	1.02829	-1.9707	0.508052	-1.11846	0.957851	-1.48231	0.186094	0.594386																			N/A	N/A	N/A	N/A	N/A	N/A	GO:0005654;GO:0005737;GO:0071006	cytoplasm;nucleoplasm;U2-type catalytic step 1 spliceosome	N/A	N/A
Tb927.8.4190:mRNA-p1	Tb927.8.4190:mRNA-p1	Tb927.8.4190	hypothetical protein, conserved	2.12934	1.2234	0.790096	-1.08057	0.877228	-0.754835	0.462186	0.304068	1.72174	-1.50505	2.05409	-2.17201	0.760362	-0.481	0.471736	-0.95083	1.62916	3.29017																			N/A	N/A	N/A	N/A	N/A	N/A	N/A	N/A	N/A	N/A
Tb927.5.2530:mRNA-p1	Tb927.5.2530:mRNA-p1	Tb927.5.2530	RNA cytidine acetyltransferase	0.488646	1.20641	0.168124	-0.683049	0.092397	-0.312084	0.117078	-0.403938	0.208704	-0.66048	0.347369	-1.16559	0.332625	-1.05193	0.648818	-1.413	0.435879	-0.937677																			N/A	N/A	GO:0005524;GO:0008080	ATP binding;N-acetyltransferase activity	GO:0016072;GO:0034470;GO:0051391	ncRNA processing;rRNA metabolic process;tRNA acetylation	GO:0005634;GO:0005730	nucleolus;nucleus	GO:0000049;GO:1990883	rRNA cytidine N-acetyltransferase activity;tRNA binding
Tb927.7.3550:mRNA-p1	Tb927.7.3550:mRNA-p1	Tb927.7.3550	cytoskeleton associated protein, putative	0.639178	1.20058	0.653605	-1.76495	0.588052	-1.33842	0.739238	-1.79333	0.132058	-0.422317	1.01669	-2.31967	0.158667	0.425602	1.27874	2.20642	1.44906	2.54908																			N/A	N/A	N/A	N/A	N/A	N/A	GO:0005856;GO:0030863	cortical cytoskeleton;cytoskeleton	GO:0044877	protein-containing complex binding
Tb927.10.5920:mRNA-p1	Tb927.10.5920:mRNA-p1	Tb927.10.5920	hypothetical protein, conserved	1.00976	1.18205	0.193425	-0.428036	0.582652	-0.912376	1.21879	-1.92462	1.48247	-2.86647	0.852162	-1.271	0.83462	-1.4351	1.46233	-1.68435	1.27123	-1.46106																			N/A	N/A	N/A	N/A	N/A	N/A	GO:0005634;GO:0005654;GO:0005730	nucleolus;nucleoplasm;nucleus	N/A	N/A
Tb927.10.12260:mRNA-p1	Tb927.10.12260:mRNA-p1	Tb927.10.12260	cytosolic nonspecific dipeptidase, putative	0.600906	1.15414	0.124399	-0.311805	0.196296	0.435472	0.153869	0.458038	0.499762	-0.999313	0.278456	-0.841293	0.0889986	-0.212098	0.585541	1.22282	1.73784	2.47021																			N/A	N/A	GO:0016787	hydrolase activity	N/A	N/A	GO:0005737;GO:0097014	ciliary plasm;cytoplasm	GO:0008233;GO:0008237	metallopeptidase activity;peptidase activity
Tb927.11.2340:mRNA-p1	Tb927.11.2340:mRNA-p1	Tb927.11.2340	hypothetical protein, conserved	0.866598	1.15114	0.511224	-0.807526	0.724833	-1.07076	0.884256	-1.57643	0.102593	-0.446865	1.00523	-2.31151	0.776772	1.39447	1.2264	-1.53089	0.488048	-0.767063																			N/A	N/A	N/A	N/A	N/A	N/A	GO:0005634;GO:0005643;GO:0005654;GO:0005730	nuclear pore;nucleolus;nucleoplasm;nucleus	GO:0042393	histone binding
Tb927.10.5280:mRNA-p1;Tb11.v5.0248.1-p1	Tb927.10.5280:mRNA-p1;Tb11.v5.0248.1-p1	Tb927.10.5280;Tb11.v5.0248	pre-mRNA splicing factor ATP-dependent RNA helicase, putative;pre-mRNA splicing factor ATP-dependent RNA helicase, putative	0.962811	1.14867	0.725446	1.84926	1.34573	1.69641	0.410683	-0.831499	0.625017	-0.994506	0.858563	-1.23076	1.00435	-1.14472	0.574445	-1.00254	0.621542	-0.528726																			N/A	N/A	GO:0003676;GO:0004386;GO:0005524	ATP binding;helicase activity;nucleic acid binding	N/A	N/A	GO:0005634;GO:0005654;GO:0005681	nucleoplasm;nucleus;spliceosomal complex	GO:0003723;GO:0003724	RNA binding;RNA helicase activity
Tb927.9.1560:mRNA-p1	Tb927.9.1560:mRNA-p1	Tb927.9.1560	DnaJ domain containing protein, putative	0.313578	1.13826	0.0781398	-0.239758	0.166065	-0.27506	0.279901	-0.895042	1.29629	-2.09397	0.487854	-1.005	0.439923	-0.787053	0.640965	-1.50412	0.132757	-0.277753																			N/A	N/A	N/A	N/A	N/A	N/A	GO:0005634;GO:0005737;GO:0031981	cytoplasm;nuclear lumen;nucleus	N/A	N/A
Tb927.3.5330:mRNA-p1	Tb927.3.5330:mRNA-p1	Tb927.3.5330	centaurin beta 5	0.849708	1.1233	0.819748	-0.879261	0.316622	-0.37693	0.21955	0.278597	1.04689	-1.21456	0.209527	-0.3316	0.0610758	-0.0845102	0.646594	1.32555	0.583557	-0.466722																			N/A	N/A	GO:0005096	GTPase activator activity	N/A	N/A	GO:0005730;GO:0005794;GO:0030133	Golgi apparatus;nucleolus;transport vesicle	GO:0005096	GTPase activator activity
Tb927.3.3030:mRNA-p1	Tb927.3.3030:mRNA-p1	Tb927.3.3030	phosphatidylcholine transfer protein, putative	0.428305	1.11564	0.810843	-1.7798	0.0359754	-0.0837832	0.486596	-0.879129	0.823935	-1.5555	0.908876	-1.59156	0.584405	-1.12905	1.3168	-1.76162	1.99069	3.1669																			N/A	N/A	GO:0008289	lipid binding	N/A	N/A	GO:0012505;GO:1990900	ciliary pocket collar;endomembrane system	N/A	N/A
Tb927.7.7300:mRNA-p1	Tb927.7.7300:mRNA-p1	Tb927.7.7300	ATP-dependent DEAD/H RNA helicase, putative	0.764165	1.09413	0.0712482	0.317426	1.6929	2.02272	1.31466	-1.31349	1.8341	-2.34747	0.133326	0.246642	0.428237	-0.75109	1.08133	-1.37322	0.529192	-0.608099																			N/A	N/A	GO:0003676;GO:0005524	ATP binding;nucleic acid binding	N/A	N/A	GO:0005634;GO:0005654;GO:0071013	catalytic step 2 spliceosome;nucleoplasm;nucleus	GO:0003723;GO:0004386;GO:0005524	ATP binding;helicase activity;RNA binding
Tb927.10.7750:mRNA-p1	Tb927.10.7750:mRNA-p1	Tb927.10.7750	hypothetical protein, conserved	0.457357	1.08753	0.358814	1.50599	0.405785	1.7449	0.485107	-1.01988	1.53267	-1.54058	2.11116	2.35829	0.0737566	-0.0860634	0.50614	1.54393	0.0730075	0.29128															+	+			N/A	N/A	N/A	N/A	N/A	N/A	GO:0005634;GO:0005654;GO:0005737	cytoplasm;nucleoplasm;nucleus	N/A	N/A
Tb927.11.14100:mRNA-p1	Tb927.11.14100:mRNA-p1	Tb927.11.14100	Double RNA-binding domain containing protein 4	0.300357	1.08692	0.179971	0.71532	0.716593	-1.22428	0.282226	-0.64953	1.33017	-2.7128	1.0508	-1.29547	1.1247	-1.32842	1.31523	-1.63917	0.952696	-1.12574																			N/A	N/A	GO:0003676	nucleic acid binding	N/A	N/A	GO:0005634;GO:0005654;GO:0005737;GO:0010494	cytoplasm;cytoplasmic stress granule;nucleoplasm;nucleus	GO:0003723;GO:0003729	mRNA binding;RNA binding
Tb927.10.14190:mRNA-p1	Tb927.10.14190:mRNA-p1	Tb927.10.14190	hypothetical protein, conserved	0.53915	1.07604	0.194381	0.626354	0.648683	0.457236	0.548866	-1.018	1.36345	-1.44884	0.564485	-1.36493	0.0366086	0.154444	1.02073	-0.662085	0.31248	1.18298																			N/A	N/A	N/A	N/A	N/A	N/A	GO:0005634;GO:0005654;GO:0005737	cytoplasm;nucleoplasm;nucleus	N/A	N/A
Tb927.9.10000:mRNA-p1	Tb927.9.10000:mRNA-p1	Tb927.9.10000	hypothetical protein, conserved	0.547964	1.03385	1.30163	-3.49419	1.24986	-3.2621	0.988642	-2.50731	1.28617	-3.37942	1.26811	-3.44511	0.902002	-2.30013	0.719355	1.43873	0.686084	-2.24745																			N/A	N/A	N/A	N/A	N/A	N/A	GO:0005730;GO:0005739;GO:0020023	kinetoplast;mitochondrion;nucleolus	N/A	N/A
Tb927.5.2400:mRNA-p1	Tb927.5.2400:mRNA-p1	Tb927.5.2400	Peptidase C19, ubiquitin carboxyl-terminal hydrolase, putative	1.70979	1.02184	0.48001	1.13528	1.79484	2.25738	0.541258	-1.25265	2.23787	-1.88088	0.493074	-0.602652	0.414535	-0.271102	1.3143	-1.02105	0.382826	-0.580891																			N/A	N/A	GO:0004843	thiol-dependent deubiquitinase	GO:0006511;GO:0016579	protein deubiquitination;ubiquitin-dependent protein catabolic process	GO:0005634;GO:0005654;GO:0005737;GO:0005829	cytoplasm;cytosol;nucleoplasm;nucleus	GO:0004197;GO:0004843	cysteine-type endopeptidase activity;thiol-dependent deubiquitinase
Tb927.2.4710:mRNA-p1	Tb927.2.4710:mRNA-p1	Tb927.2.4710	RNA-binding protein, putative	0.24068	0.99575	0.934795	-4.61891	0.861694	-4.24627	1.0991	-5.5995	1.01799	-5.09004	0.956704	-5.36062	0.949301	-4.7223	0.164529	0.728364	0.123906	-0.644815																			N/A	N/A	GO:0003676;GO:0008270	nucleic acid binding;zinc ion binding	N/A	N/A	GO:0005634;GO:0005654;GO:0005730;GO:0016607	nuclear speck;nucleolus;nucleoplasm;nucleus	GO:0003723;GO:0003729	mRNA binding;RNA binding
Tb927.10.9840:mRNA-p1	Tb927.10.9840:mRNA-p1	Tb927.10.9840	chaperone protein DnaJ, putative	0.790264	0.991892	1.856	-1.62358	1.62867	-1.02873	0.905328	-0.758149	1.80999	-1.43651	2.92813	-1.78286	2.86046	-1.11845	1.84953	-1.37669	0.941262	-0.671906																			N/A	N/A	N/A	N/A	N/A	N/A	GO:0005634;GO:0005654;GO:0005730;GO:0005737	cytoplasm;nucleolus;nucleoplasm;nucleus	GO:0031072;GO:0051082	heat shock protein binding;unfolded protein binding
Tb927.5.4500:mRNA-p1;Tb05.5K5.150:mRNA-p1	Tb927.5.4500:mRNA-p1;Tb05.5K5.150:mRNA-p1	Tb927.5.4500;Tb05.5K5.150	small GTP-binding protein, putative;ras-like small GTPase, putative	0.27842	0.969632	0.19746	0.676292	0.258797	-0.621843	0.719906	-1.27522	0.53116	0.961706	1.25603	2.27047	0.274659	-0.930307	0.971595	1.31043	0.338143	1.5598																+			GO:0005794	Golgi apparatus	GO:0005525	GTP binding	GO:0006886	intracellular protein transport	GO:0005783;GO:0030127;GO:0070971	COPII vesicle coat;endoplasmic reticulum;endoplasmic reticulum exit site	GO:0003924	GTPase activity
Tb927.11.6320:mRNA-p1	Tb927.11.6320:mRNA-p1	Tb927.11.6320	MRB1-associated protein	0.325379	0.945478	1.29116	-4.71231	1.05143	-3.80432	1.25906	-4.75582	1.15763	-4.49987	1.37252	-5.21812	1.1493	-4.13005	0.512982	-1.83976	0.957976	-3.2034																			N/A	N/A	GO:0046872	metal ion binding	N/A	N/A	N/A	N/A	N/A	N/A
Tb927.10.11510:mRNA-p1	Tb927.10.11510:mRNA-p1	Tb927.10.11510	hypothetical protein, conserved	0.426489	0.935096	0.0621393	-0.160892	0.151404	-0.324543	0.496576	-1.54111	0.797047	-1.46214	0.110935	-0.259445	0.482677	-0.907528	0.780812	-1.44795	0.476962	-0.695581																			N/A	N/A	N/A	N/A	N/A	N/A	GO:0005634;GO:0005737;GO:0030133	cytoplasm;nucleus;transport vesicle	N/A	N/A
Tb927.11.3140:mRNA-p1	Tb927.11.3140:mRNA-p1	Tb927.11.3140	dual specificity tyrosine-phosphorylation-regulated kinase 2, putative	0.779279	0.924818	1.45757	-2.35855	0.854275	-1.32123	0.964289	-2.30074	1.66252	-2.81085	1.33126	-2.59338	1.10281	-1.65746	1.24406	1.45896	0.455377	-0.867191																			N/A	N/A	GO:0004672;GO:0004712;GO:0005524	ATP binding;protein kinase activity;protein serine/threonine/tyrosine kinase activity	GO:0006468	protein phosphorylation	GO:0005737;GO:0005856;GO:0005929;GO:0005930	axoneme;cilium;cytoplasm;cytoskeleton	GO:0004674;GO:0005524	ATP binding;protein serine/threonine kinase activity
Tb927.11.13810:mRNA-p1	Tb927.11.13810:mRNA-p1	Tb927.11.13810	ATP- dependent RNA helicase, putative	0.77168	0.911288	0.49218	-0.849491	0.372787	-0.642919	0.528676	-1.24793	1.09804	-2.04149	1.15795	-1.92834	0.764291	-1.26263	0.0244756	0.10991	1.01471	-1.42364																			N/A	N/A	GO:0003676;GO:0005524	ATP binding;nucleic acid binding	N/A	N/A	GO:0005730;GO:0030133	nucleolus;transport vesicle	GO:0004386;GO:0005524	ATP binding;helicase activity
Tb927.5.3600.2:mRNA-p1;Tb927.5.3600.1:mRNA-p1	Tb927.5.3600.2:mRNA-p1;Tb927.5.3600.1:mRNA-p1	Tb927.5.3600	ATP-dependent DEAD/H RNA helicase, putative;ATP-dependent DEAD/H RNA helicase, putative	0.439553	0.907021	0.600026	1.45719	1.33283	2.20162	0.802668	-0.991811	1.71021	-2.52363	0.375727	-0.647868	0.441142	-1.03527	0.73515	-0.759016	0.761095	-1.04856																			N/A	N/A	GO:0003676;GO:0004386;GO:0005524	ATP binding;helicase activity;nucleic acid binding	N/A	N/A	GO:0005634;GO:0005654;GO:0005737;GO:1990904	cytoplasm;nucleoplasm;nucleus;ribonucleoprotein complex	GO:0003723;GO:0003724;GO:0004386;GO:0005524;N/A	ATP binding;helicase activity;N/A;RNA binding;RNA helicase activity
Tb927.7.2240:mRNA-p1	Tb927.7.2240:mRNA-p1	Tb927.7.2240	hypothetical protein, conserved	0.34263	0.899673	0.195432	0.782221	0.111928	0.380674	0.344273	-1.00334	0.675204	-1.89189	0.107665	-0.358753	0.151816	-0.480821	0.497505	-1.1728	0.270955	-0.712674																			N/A	N/A	N/A	N/A	N/A	N/A	GO:0005634;GO:0005654	nucleoplasm;nucleus	GO:0003729	mRNA binding
Tb927.4.3180:mRNA-p1	Tb927.4.3180:mRNA-p1	Tb927.4.3180	hypothetical protein, conserved	0.318321	0.892212	0.509319	-1.00662	0.109443	-0.261401	0.635732	-1.2309	1.03839	-2.0961	0.974695	-1.89721	0.0421077	-0.109886	0.0197673	-0.0500488	0.542726	-0.8135																			N/A	N/A	GO:0005515	protein binding	N/A	N/A	GO:0005634;GO:0031981	nuclear lumen;nucleus	N/A	N/A
Tb927.8.2030:mRNA-p1	Tb927.8.2030:mRNA-p1	Tb927.8.2030	Posterior and Ventral Edge protein 1	0.592533	0.879457	0.914545	-1.24339	0.98914	-1.2022	1.62886	-1.86957	1.76162	2.1809	1.29095	1.33987	0.710432	0.737783	2.4571	2.07113	2.51657	4.78607		+								+			+	+		+			N/A	N/A	N/A	N/A	N/A	N/A	GO:0030863;GO:0120119	cortical cytoskeleton;flagellum attachment zone	N/A	N/A
Tb927.6.1800:mRNA-p1	Tb927.6.1800:mRNA-p1	Tb927.6.1800	protein phosphatase 2C, putative	0.357391	0.872484	0.277466	-0.467323	0.434941	-0.167552	1.89766	-1.18274	2.62586	-2.64083	0.879137	-0.650195	1.85122	-0.924739	0.528276	-0.743475	0.308763	1.39071																			N/A	N/A	GO:0016791;GO:0106306;GO:0106307	phosphatase activity;protein serine phosphatase activity;protein threonine phosphatase activity	N/A	N/A	GO:0005737;GO:0020015;GO:0031981;GO:0097014	ciliary plasm;cytoplasm;glycosome;nuclear lumen	GO:0016791	phosphatase activity
Tb927.7.5310:mRNA-p1	Tb927.7.5310:mRNA-p1	Tb927.7.5310	YEATS family, putative	0.359905	0.837611	0.201363	0.946583	1.07755	1.49722	0.187426	0.213441	1.38498	-2.08031	0.0684538	0.276756	0.656083	-1.13504	0.906426	-0.829063	0.284511	-0.33728																			GO:0000812;GO:0035267	NuA4 histone acetyltransferase complex;Swr1 complex	N/A	N/A	GO:0006281;GO:0006325;GO:0006355	chromatin organization;DNA repair;regulation of transcription, DNA-templated	GO:0005634;GO:0005737	cytoplasm;nucleus	N/A	N/A
Tb927.8.1410:mRNA-p1;Tb11.v5.0588.1-p1	Tb927.8.1410:mRNA-p1;Tb11.v5.0588.1-p1	Tb927.8.1410;Tb11.v5.0588	AARP2CN (NUC121) domain containing protein, putative;pre-rrna-processing protein tsr1 homolog	0.317489	0.81405	0.157752	0.267936	0.387145	-0.678782	0.37735	-0.942189	1.143	-1.81931	1.36415	-2.03675	0.677501	-0.973901	0.376344	-0.764315	0.457845	-0.682088																			GO:0005634	nucleus	N/A	N/A	GO:0042254	ribosome biogenesis	GO:0005730;GO:0005737;GO:0030688;N/A	cytoplasm;N/A;nucleolus;preribosome, small subunit precursor	GO:0003924;GO:0005525;GO:0034511;N/A	GTP binding;GTPase activity;N/A;U3 snoRNA binding
Tb927.11.1980:mRNA-p1	Tb927.11.1980:mRNA-p1	Tb927.11.1980	zinc finger protein family member, putative	0.479452	0.806321	1.45123	-3.41715	0.937313	-1.98247	1.54856	-3.58636	0.109371	-0.348522	1.8328	-4.70762	0.349316	-1.36771	1.0419	1.6547	0.914485	1.39253																			N/A	N/A	GO:0046872	metal ion binding	N/A	N/A	GO:0005634;GO:0005730;GO:0005737;GO:0010494;GO:0043186	cytoplasm;cytoplasmic stress granule;nucleolus;nucleus;P granule	GO:0003723;GO:0003724;GO:0003729	mRNA binding;RNA binding;RNA helicase activity
Tb927.9.13490:mRNA-p1	Tb927.9.13490:mRNA-p1	Tb927.9.13490	metallo-peptidase, Clan MG, Family M24	0.25592	0.804246	0.0920379	0.592959	0.895828	0.590709	1.15687	-1.65689	0.461387	1.71092	2.65846	2.94021	1.47688	1.10644	0.249025	-0.53079	1.77427	3.26194															+	+			N/A	N/A	GO:0030145;GO:0070006	manganese ion binding;metalloaminopeptidase activity	N/A	N/A	GO:0005737;GO:0097014	ciliary plasm;cytoplasm	GO:0008233	peptidase activity
Tb927.11.9730:mRNA-p1;Tb927.10.12680:mRNA-p1	Tb927.11.9730:mRNA-p1;Tb927.10.12680:mRNA-p1	Tb927.11.9730;Tb927.10.12680	60S ribosomal protein L34, putative;60S ribosomal protein L34, putative	0.122083	0.799809	0.0325583	-0.272631	0.0560614	-0.37008	0.507318	2.3524	0.512139	2.33973	0.411402	1.92586	0.275372	1.34669	0.0995203	0.646814	0.0821024	0.454271																			GO:0005840	ribosome	GO:0003735	structural constituent of ribosome	GO:0006412	translation	GO:0005730;GO:0005737;GO:0005840;GO:0022625	cytoplasm;cytosolic large ribosomal subunit;nucleolus;ribosome	GO:0003735	structural constituent of ribosome
Tb927.11.14830:mRNA-p1	Tb927.11.14830:mRNA-p1	Tb927.11.14830	hypothetical protein, conserved	0.382172	0.785522	0.0378873	0.118917	0.134095	-0.340119	0.701414	-1.41322	1.02772	-2.16858	0.533022	-1.10451	0.389746	-0.872105	0.508798	-0.864915	0.571612	-0.884622																			N/A	N/A	N/A	N/A	N/A	N/A	GO:0005654;GO:0005737;GO:0031981;GO:0097014	ciliary plasm;cytoplasm;nuclear lumen;nucleoplasm	N/A	N/A
Tb11.02.5430b.1-p1;Tb11.02.5430:mRNA-p1	Tb11.02.5430b.1-p1;Tb11.02.5430:mRNA-p1	Tb11.02.5430b;Tb11.02.5430	hypothetical protein, conserved;hypothetical protein, conserved	0.34921	0.770051	1.53081	-4.62681	1.26771	-3.7961	1.10011	-3.02818	1.37702	-3.96277	1.599	-5.24059	1.08051	-3.00476	0.655695	1.3096	0.251766	-0.936548																			N/A	N/A	N/A	N/A	N/A	N/A	N/A	N/A	N/A	N/A
Tb927.10.2910:mRNA-p1	Tb927.10.2910:mRNA-p1	Tb927.10.2910	splicing factor PTSR1 interacting protein	0.371185	0.76977	0.441719	-1.89037	0.722255	-1.8565	1.09481	-3.33023	1.05476	-2.74	1.1111	-2.94557	0.720984	-2.09144	0.194622	0.480083	0.430707	-1.18059																			N/A	N/A	N/A	N/A	N/A	N/A	GO:0005634;GO:0005654;GO:0016607	nuclear speck;nucleoplasm;nucleus	GO:0003723	RNA binding
Tb927.10.2110:mRNA-p1;Tb927.10.2100:mRNA-p1;Tb927.10.2090:mRNA-p1;Tb11.v5.1046.1-p1	Tb927.10.2110:mRNA-p1;Tb927.10.2100:mRNA-p1;Tb927.10.2090:mRNA-p1;Tb11.v5.1046.1-p1	Tb927.10.2110;Tb927.10.2100;Tb927.10.2090;Tb11.v5.1046	elongation factor 1-alpha, putative;elongation factor 1-alpha;elongation factor 1-alpha;elongation factor 1-alpha	0.513323	0.757092	0.160612	-0.556743	0.0891044	-0.199877	0.104117	-0.235027	0.821546	1.71321	0.395299	0.762204	1.00394	1.87222	0.835685	1.13959	1.62399	2.78395														+					N/A	N/A	GO:0003746;GO:0003924;GO:0005525	GTP binding;GTPase activity;translation elongation factor activity	GO:0006414	translational elongation	GO:0005737	cytoplasm	GO:0003729;GO:0003746;GO:0003924;GO:0005516	calmodulin binding;GTPase activity;mRNA binding;translation elongation factor activity
Tb927.11.15120:mRNA-p1	Tb927.11.15120:mRNA-p1	Tb927.11.15120	hypothetical protein, conserved	0.737681	0.756589	1.73507	-2.93155	1.01488	-1.48041	1.39108	-2.20148	1.66712	-2.68569	1.40949	-3.02637	0.799272	-1.31234	0.0532023	0.140008	0.624881	-1.19691																			N/A	N/A	N/A	N/A	N/A	N/A	GO:0005930;GO:0030133	axoneme;transport vesicle	N/A	N/A
Tb927.7.1340:mRNA-p1;Tb927.7.1320:mRNA-p1	Tb927.7.1340:mRNA-p1;Tb927.7.1320:mRNA-p1	Tb927.7.1340;Tb927.7.1320	10 kDa heat shock protein, putative;10 kDa heat shock protein, putative	0.393359	0.74635	1.28106	-1.68394	0.382926	-0.549863	0.991744	-1.27946	1.36748	-1.91468	1.07052	-1.49578	1.65876	2.43015	1.38743	-2.01528	0.152961	0.43045																		+	N/A	N/A	N/A	N/A	GO:0006457	protein folding	GO:0005739;GO:0005759;GO:0031966	mitochondrial matrix;mitochondrial membrane;mitochondrion	GO:0046872;GO:0051082;GO:0051087	chaperone binding;metal ion binding;unfolded protein binding
Tb927.11.8280:mRNA-p1	Tb927.11.8280:mRNA-p1	Tb927.11.8280	hypothetical protein, conserved	0.298267	0.730132	0.153602	-0.594982	0.407644	0.39641	1.66346	-1.76864	0.272739	-0.389791	1.324	-1.51032	0.535224	-0.523519	1.06257	-1.13851	0.161855	0.309178																			N/A	N/A	N/A	N/A	N/A	N/A	GO:0005634;GO:0005654;GO:0005737	cytoplasm;nucleoplasm;nucleus	N/A	N/A
Tb927.1.3050:mRNA-p1	Tb927.1.3050:mRNA-p1	Tb927.1.3050	tRNA (Uracil-5-)-methyltransferase, putative	0.406084	0.729026	1.99381	-2.00007	0.424046	-0.454096	1.26382	-1.01321	1.09676	-1.18122	1.76559	-1.68584	0.288793	-0.245654	0.463432	-0.700968	0.632899	-0.676814																			N/A	N/A	GO:0008173	RNA methyltransferase activity	GO:0006396	RNA processing	GO:0005634;GO:0030133	nucleus;transport vesicle	N/A	N/A
Tb927.10.5810:mRNA-p1	Tb927.10.5810:mRNA-p1	Tb927.10.5810	The ARF-like 2 binding protein BART, putative	0.330669	0.679488	0.0238959	-0.123258	0.181192	-0.381582	0.77486	-1.4067	0.042281	-0.188593	0.405415	-0.728697	0.428777	-0.789428	0.237369	0.60807	1.99299	3.45604																			N/A	N/A	N/A	N/A	N/A	N/A	GO:0005737;GO:0005930;GO:0097014;GO:0097546	axoneme;ciliary base;ciliary plasm;cytoplasm	N/A	N/A
Tb927.11.15460:mRNA-p1	Tb927.11.15460:mRNA-p1	Tb927.11.15460	ATP-dependent DEAD/H RNA helicase, putative	0.515745	0.6747	0.709896	-0.918762	0.0306209	-0.0466429	0.409313	-0.999931	0.868639	-1.0254	1.04435	-1.48205	0.461055	-0.585255	0.708817	-0.617263	0.12867	-0.224643																			N/A	N/A	GO:0003676;GO:0003723;GO:0004386;GO:0005524	ATP binding;helicase activity;nucleic acid binding;RNA binding	N/A	N/A	GO:0005634;GO:0005730	nucleolus;nucleus	GO:0004386;GO:0005524	ATP binding;helicase activity
Tb927.10.3950:mRNA-p1	Tb927.10.3950:mRNA-p1	Tb927.10.3950	hypothetical protein, conserved	0.257959	0.670252	0.200367	0.835822	0.110902	-0.149504	0.938646	-1.24447	1.60152	-1.85597	0.508072	-0.88038	0.375204	-0.543638	1.33293	-1.58561	0.227672	-0.28544																			N/A	N/A	N/A	N/A	N/A	N/A	GO:0005654;GO:0005737	cytoplasm;nucleoplasm	N/A	N/A
Tb927.10.1510:mRNA-p1	Tb927.10.1510:mRNA-p1	Tb927.10.1510	CCR4-NOT transcription complex subunit 1	0.393051	0.661458	0.82112	-1.21871	0.00834616	0.0207609	0.313407	-1.21635	0.180643	-0.418525	0.486857	-0.818011	0.290469	0.470962	2.72154	3.70321	2.80063	5.62956		+							+	+									GO:0030015	CCR4-NOT core complex	N/A	N/A	GO:0006417	regulation of translation	GO:0000932;GO:0005737;GO:0010494;GO:0030015	CCR4-NOT core complex;cytoplasm;cytoplasmic stress granule;P-body	GO:0060090	molecular adaptor activity
Tb927.8.900:mRNA-p1	Tb927.8.900:mRNA-p1	Tb927.8.900	splicing factor TSR1	0.221733	0.645985	0.598432	-2.81519	1.12749	-3.78642	1.20849	-4.17568	0.634711	-2.62121	1.1365	-4.05386	0.53953	-2.27958	0.465019	1.21579	0.325777	-1.40306																			N/A	N/A	GO:0003676	nucleic acid binding	N/A	N/A	GO:0005634;GO:0005654;GO:0005730;GO:0016607;GO:0031981	nuclear lumen;nuclear speck;nucleolus;nucleoplasm;nucleus	GO:0003723;GO:0003729	mRNA binding;RNA binding
Tb927.9.4310:mRNA-p1	Tb927.9.4310:mRNA-p1	Tb927.9.4310	tricarboxylate carrier, putative	0.437123	0.63141	0.493393	-1.06884	0.191782	0.363602	0.0943047	-0.28807	0.00306641	-0.0104698	0.0581196	-0.123936	0.350886	-0.605686	0.730235	-0.869347	0.110809	0.185922																			GO:0016020	membrane	GO:0015075	ion transmembrane transporter activity	GO:0006811;GO:0006865;GO:0055085	amino acid transport;ion transport;transmembrane transport	GO:0005739;GO:0005743;GO:0020023;GO:0031305	integral component of mitochondrial inner membrane;kinetoplast;mitochondrial inner membrane;mitochondrion	GO:0022857	transmembrane transporter activity
Tb927.11.12420:mRNA-p1	Tb927.11.12420:mRNA-p1	Tb927.11.12420	kinetoplastid kinetochore protein 19	0.498214	0.61792	0.37564	-0.711833	1.23704	0.996641	0.795417	-1.64909	1.99657	-2.06994	1.95757	-1.58991	1.03992	-0.924352	1.22498	-1.29946	0.0587984	-0.140863																			N/A	N/A	GO:0004672;GO:0005524	ATP binding;protein kinase activity	GO:0006468	protein phosphorylation	GO:0005634;GO:0005654	nucleoplasm;nucleus	GO:0004672;GO:0004674;GO:0005524	ATP binding;protein kinase activity;protein serine/threonine kinase activity
Tb927.3.2710:mRNA-p1	Tb927.3.2710:mRNA-p1	Tb927.3.2710	6-phosphofructo-2-kinase 2	0.460317	0.613592	1.32172	-2.72877	1.08871	-1.91795	1.49245	-2.79607	1.51066	-3.11545	1.27702	-2.41801	1.04012	-1.83717	0.783177	1.12663	0.265598	0.378839																			N/A	N/A	GO:0003824;GO:0003873;GO:0005515;GO:0005524	6-phosphofructo-2-kinase activity;ATP binding;catalytic activity;protein binding	GO:0006000;GO:0006003	fructose 2,6-bisphosphate metabolic process;fructose metabolic process	GO:0005737;GO:0005829	cytoplasm;cytosol	GO:0003873;GO:0004331	6-phosphofructo-2-kinase activity;fructose-2,6-bisphosphate 2-phosphatase activity
Tb927.4.1820:mRNA-p1	Tb927.4.1820:mRNA-p1	Tb927.4.1820	selenocysteine-specific elongation factor, putative	0.315733	0.612265	1.75795	-2.48071	0.290725	-0.422438	0.623298	-0.713706	0.606493	-1.19874	1.32402	-1.6493	1.04758	-1.31662	0.104684	-0.237617	0.47448	1.75358																			N/A	N/A	GO:0003924;GO:0005525	GTP binding;GTPase activity	N/A	N/A	GO:0005737	cytoplasm	GO:0003746	translation elongation factor activity
Tb927.9.9010:mRNA-p1	Tb927.9.9010:mRNA-p1	Tb927.9.9010	SAC3/GANP/Nin1/mts3/eIF-3 p25 family, putative	0.749966	0.608296	0.0879708	-0.260735	1.21917	-1.53567	1.51543	-1.29616	2.25101	-2.3447	1.23886	-1.43012	1.0781	-0.874497	1.5411	-1.36197	1.92827	-1.4409																			N/A	N/A	N/A	N/A	N/A	N/A	GO:0005634;GO:0005654	nucleoplasm;nucleus	N/A	N/A
Tb927.8.3530:mRNA-p1	Tb927.8.3530:mRNA-p1	Tb927.8.3530	glycerol-3-phosphate dehydrogenase [NAD+], glycosomal	0.309916	0.607894	0.573022	-2.42392	0.860853	-1.9391	0.355166	-0.825157	0.0609752	0.167291	0.405631	-0.930531	0.099721	0.26516	0.231039	0.442187	0.435034	0.853383																			GO:0009331	glycerol-3-phosphate dehydrogenase complex	GO:0004367;GO:0016491;GO:0016616;GO:0042803;GO:0051287	glycerol-3-phosphate dehydrogenase [NAD+] activity;NAD binding;oxidoreductase activity;oxidoreductase activity, acting on the CH-OH group of donors, NAD or NADP as acceptor;protein homodimerization activity	GO:0005975;GO:0006072;GO:0046168;GO:0055114	carbohydrate metabolic process;glycerol-3-phosphate catabolic process;glycerol-3-phosphate metabolic process;obsolete oxidation-reduction process	GO:0005829;GO:0009331;GO:0020015	cytosol;glycerol-3-phosphate dehydrogenase complex;glycosome	GO:0004367;GO:0042301	glycerol-3-phosphate dehydrogenase [NAD+] activity;phosphate ion binding
Tb927.11.16760:mRNA-p1	Tb927.11.16760:mRNA-p1	Tb927.11.16760	T-complex protein 1, alpha subunit, putative	0.578302	0.603614	0.137516	0.515687	0.981598	-1.33928	0.78177	-1.33206	0.647705	1.54886	0.370318	-1.13657	0.0891335	-0.148197	0.12818	0.158996	1.89005	2.51856																			N/A	N/A	GO:0005524;GO:0051082	ATP binding;unfolded protein binding	GO:0006457	protein folding	GO:0005737;GO:0005832;GO:0097014	chaperonin-containing T-complex;ciliary plasm;cytoplasm	GO:0051082	unfolded protein binding
Tb927.9.7820:mRNA-p1	Tb927.9.7820:mRNA-p1	Tb927.9.7820	KKT-interacting protein 11	0.205453	0.600038	2.21696	5.69367	2.55506	4.40286	1.34494	-1.51833	1.24907	-1.49919	1.80989	2.21156	0.376772	-0.679134	1.67609	-1.24524	1.07221	-1.23742						+		+							+	+			N/A	N/A	N/A	N/A	N/A	N/A	GO:0000776;GO:0005634	kinetochore;nucleus	N/A	N/A
Tb927.8.6430:mRNA-p1	Tb927.8.6430:mRNA-p1	Tb927.8.6430	hypothetical protein, conserved	0.193111	0.59396	0.339694	1.24091	0.0184957	-0.0329358	0.534941	-0.849297	0.163388	0.542811	1.75657	2.62861	0.319099	-0.458865	0.94102	-0.971829	0.64104	2.1285															+	+			N/A	N/A	N/A	N/A	N/A	N/A	GO:0005737;GO:0005930;GO:0031981;GO:0035869;GO:0097014	axoneme;ciliary plasm;ciliary transition zone;cytoplasm;nuclear lumen	N/A	N/A
Tb927.10.5030:mRNA-p1;Tb927.7.3680:mRNA-p1	Tb927.10.5030:mRNA-p1;Tb927.7.3680:mRNA-p1	Tb927.10.5030;Tb927.7.3680	ubiquitin/ribosomal protein S27a, putative;ubiquitin/ribosomal protein S27a, putative	0.270441	0.581042	0.400581	-1.09527	0.654568	-1.69965	0.367279	-1.00067	0.540772	-1.3774	0.631986	-1.60413	0.624123	-1.58179	0.33526	0.678576	0.525771	-1.02143																			GO:0005840	ribosome	GO:0003735;GO:0005515;GO:0046872	metal ion binding;protein binding;structural constituent of ribosome	GO:0006412	translation	GO:0005634;GO:0005737;GO:0005840	cytoplasm;nucleus;ribosome	GO:0003735;GO:0020037;GO:0031386;GO:0031625	heme binding;protein tag;structural constituent of ribosome;ubiquitin protein ligase binding
Tb927.7.6450:mRNA-p1	Tb927.7.6450:mRNA-p1	Tb927.7.6450	tRNA-dihydrouridine synthase 3, putative	0.296933	0.580451	0.497285	-0.977842	0.768061	-0.772828	0.701966	-0.589594	1.32787	-1.49957	1.52722	-1.43358	1.03662	-1.03567	1.29077	-0.93703	0.996573	-0.837674																			N/A	N/A	GO:0003824;GO:0017150;GO:0050660	catalytic activity;flavin adenine dinucleotide binding;tRNA dihydrouridine synthase activity	GO:0008033;GO:0055114	obsolete oxidation-reduction process;tRNA processing	GO:0031981	nuclear lumen	GO:0017150	tRNA dihydrouridine synthase activity
Tb927.5.2890.2:mRNA-p1;Tb927.5.2890.1:mRNA-p1	Tb927.5.2890.2:mRNA-p1;Tb927.5.2890.1:mRNA-p1	Tb927.5.2890	AAA domain (dynein-related subfamily)/von Willebrand factor type A domain containing protein, putative;AAA domain (dynein-related subfamily)/von Willebrand factor type A domain containing protein, putative	1.15975	0.578277	0.245584	-0.861916	0.94485	1.12362	0.207479	-0.362569	1.42956	-2.85845	1.41475	-1.51235	1.70777	-1.33496	0.709552	0.434441	0.458908	-0.588485																			N/A	N/A	GO:0005524;GO:0016887	ATP binding;ATP hydrolysis activity	N/A	N/A	GO:0005634;GO:0005737;GO:0031981;GO:0097014	ciliary plasm;cytoplasm;nuclear lumen;nucleus	GO:0016887;N/A	ATP hydrolysis activity;N/A
Tb927.9.13970:mRNA-p1	Tb927.9.13970:mRNA-p1	Tb927.9.13970	KKT-interacting protein 9	0.344938	0.571295	1.61568	3.12177	1.82779	2.37249	0.808196	-0.892459	1.27511	-1.45083	1.65504	-2.13609	1.06338	-1.1657	0.846462	-1.10682	0.303878	-0.398838						+													N/A	N/A	N/A	N/A	N/A	N/A	GO:0000776;GO:0005634;GO:0005654	kinetochore;nucleoplasm;nucleus	N/A	N/A
Tb927.10.7810:mRNA-p1	Tb927.10.7810:mRNA-p1	Tb927.10.7810	Pre-rRNA-processing protein ESF1, putative	0.206003	0.570932	0.950895	-1.29035	1.99582	-1.15111	2.60343	-2.35486	3.79353	-2.78122	3.82416	-2.29951	1.25637	-1.7137	4.71707	-2.11163	2.48701	-1.97435																			N/A	N/A	N/A	N/A	GO:0006364	rRNA processing	GO:0005634;GO:0005730	nucleolus;nucleus	GO:0003723	RNA binding
Tb927.11.7840:mRNA-p1	Tb927.11.7840:mRNA-p1	Tb927.11.7840	ribonucleoside-diphosphate reductase large chain	0.296186	0.552989	0.679403	1.64648	1.0568	1.56379	6.99e-05	0.000188192	0.711555	-0.941367	1.4621	-2.24701	0.379553	-0.581218	0.117446	-0.350244	0.0695148	0.132513																			N/A	N/A	GO:0004748;GO:0005524	ATP binding;ribonucleoside-diphosphate reductase activity, thioredoxin disulfide as acceptor	GO:0006260;GO:0055114	DNA replication;obsolete oxidation-reduction process	GO:0005654;GO:0005971	nucleoplasm;ribonucleoside-diphosphate reductase complex	GO:0004748	ribonucleoside-diphosphate reductase activity, thioredoxin disulfide as acceptor
Tb927.11.6610:mRNA-p1	Tb927.11.6610:mRNA-p1	Tb927.11.6610	hypothetical protein, conserved	0.241141	0.55016	0.0758878	-0.360985	0.158651	-0.56866	0.508487	-0.860359	1.69311	-3.51987	0.792938	-1.15911	1.15547	-0.885768	1.63477	-1.34585	1.20931	-1.01445																			N/A	N/A	GO:0003676	nucleic acid binding	N/A	N/A	N/A	N/A	N/A	N/A
Tb927.11.9130:mRNA-p1	Tb927.11.9130:mRNA-p1	Tb927.11.9130	Replication factor A protein 1	0.265459	0.544357	0.019764	0.111317	0.303629	-0.614501	0.708732	-1.67499	0.570954	-1.1843	0.811762	-1.49226	0.890417	-1.64589	0.591395	-1.11977	0.843842	-1.17549																			GO:0005634	nucleus	GO:0003676;GO:0003677;GO:0046872	DNA binding;metal ion binding;nucleic acid binding	GO:0006260;GO:0006281;GO:0006310	DNA recombination;DNA repair;DNA replication	GO:0005654;GO:0005662;GO:0034399	DNA replication factor A complex;nuclear periphery;nucleoplasm	GO:0003684;GO:0003697;GO:0043047;GO:0043565	damaged DNA binding;sequence-specific DNA binding;single-stranded DNA binding;single-stranded telomeric DNA binding
Tb927.6.1900:mRNA-p1	Tb927.6.1900:mRNA-p1	Tb927.6.1900	essential nuclear protein 1, putative	0.232693	0.530714	0.38808	-1.08348	0.634679	-1.28303	0.253194	-0.560873	1.09485	-2.22981	0.41512	-0.959001	0.471009	-0.968388	0.668811	-1.13957	0.642797	-1.11293																			N/A	N/A	N/A	N/A	N/A	N/A	GO:0005634;GO:0005730;GO:0005737;GO:0030688;GO:0031981;GO:0097014	ciliary plasm;cytoplasm;nuclear lumen;nucleolus;nucleus;preribosome, small subunit precursor	GO:0030515	snoRNA binding
Tb927.11.15430:mRNA-p1	Tb927.11.15430:mRNA-p1	Tb927.11.15430	U5 small nuclear ribonucleoprotein component, putative	0.658991	0.503271	0.117576	-0.324614	2.38651	1.29873	1.61827	-0.757306	0.325733	0.370629	1.30129	-1.76773	0.821099	-0.688487	0.021137	0.0238088	0.751906	1.95671																			N/A	N/A	GO:0003924;GO:0005525	GTP binding;GTPase activity	N/A	N/A	GO:0005634;GO:0005654;GO:0046540;GO:0071007;GO:1990904	nucleoplasm;nucleus;ribonucleoprotein complex;U2-type catalytic step 2 spliceosome;U4/U6 x U5 tri-snRNP complex	GO:0003924;GO:0005525;GO:0030623	GTP binding;GTPase activity;U5 snRNA binding
Tb927.10.4100:mRNA-p1	Tb927.10.4100:mRNA-p1	Tb927.10.4100	hypothetical protein, conserved	0.195904	0.498866	0.222953	1.21132	0.140376	-0.185587	0.847162	-1.47689	1.27293	-1.70755	0.025667	-0.0397825	0.473603	-0.537344	1.03109	-0.97746	0.691446	-0.965745																			N/A	N/A	N/A	N/A	N/A	N/A	GO:0005634;GO:0005654	nucleoplasm;nucleus	N/A	N/A
Tb927.10.5040:mRNA-p1;Tb11.v5.0342.1-p1	Tb927.10.5040:mRNA-p1;Tb11.v5.0342.1-p1	Tb927.10.5040;Tb11.v5.0342	chaperone protein DnaJ, putative;chaperone protein DnaJ, putative	0.195796	0.469205	0.773231	-1.76252	0.282916	-0.699129	0.586657	-1.28221	0.938872	2.35728	0.675692	-1.46438	0.0859581	0.234482	1.35161	2.15203	1.62362	4.23786														+					N/A	N/A	N/A	N/A	N/A	N/A	N/A	N/A	GO:0051082	unfolded protein binding
Tb927.11.1020:mRNA-p1	Tb927.11.1020:mRNA-p1	Tb927.11.1020	ribokinase, putative	0.138163	0.458304	0.192287	1.04102	0.199011	-0.46326	0.0863445	-0.207124	0.409373	1.79333	0.201865	0.816785	0.539219	-1.07934	0.0541706	-0.156544	0.462567	1.62802																			GO:0005634	nucleus	GO:0004747;GO:0005524;GO:0016301;GO:0016773;GO:0046872	ATP binding;kinase activity;metal ion binding;phosphotransferase activity, alcohol group as acceptor;ribokinase activity	GO:0006014;GO:0019303	D-ribose catabolic process;D-ribose metabolic process	GO:0020015	glycosome	GO:0004747	ribokinase activity
Tb927.4.2970:mRNA-p1;Tb11.v5.0970.1-p1	Tb927.4.2970:mRNA-p1;Tb11.v5.0970.1-p1	Tb927.4.2970;Tb11.v5.0970	chaperone protein DnaJ, putative;chaperone protein DnaJ, putative	0.194097	0.448465	1.30905	-1.88747	1.10525	-1.27007	1.32885	-2.08298	1.44815	-1.79382	1.59471	-2.08932	0.970679	-1.30325	0.0065186	0.0170492	0.335983	-0.625926																			N/A	N/A	N/A	N/A	N/A	N/A	GO:0005737;GO:0097014	ciliary plasm;cytoplasm	GO:0051082	unfolded protein binding
Tb927.8.4170:mRNA-p1	Tb927.8.4170:mRNA-p1	Tb927.8.4170	RNA-binding protein, putative	0.245221	0.443646	1.34294	-2.02451	0.638248	-0.768195	0.991711	-1.90947	0.77781	-0.818652	1.36348	-2.09069	0.444129	-0.788121	1.5878	-1.74023	0.538941	-0.732425																			N/A	N/A	GO:0003676	nucleic acid binding	N/A	N/A	GO:0005634;GO:0005654;GO:0005730;GO:0005737;GO:0016607	cytoplasm;nuclear speck;nucleolus;nucleoplasm;nucleus	GO:0003723	RNA binding
Tb927.8.1510:mRNA-p1	Tb927.8.1510:mRNA-p1	Tb927.8.1510	ATP-dependent RNA helicase DBP2B, putative	0.217939	0.424675	0.0607257	-0.176552	0.0583021	0.163321	0.45741	-1.09779	0.991157	-2.21858	0.476421	-1.219	0.82776	-1.83781	0.622912	-1.06639	1.12002	-1.76322																			N/A	N/A	GO:0003676;GO:0004386;GO:0005524	ATP binding;helicase activity;nucleic acid binding	N/A	N/A	GO:0005634;GO:0005654;GO:0005730;GO:0005737;GO:0031981;GO:1990904	cytoplasm;nuclear lumen;nucleolus;nucleoplasm;nucleus;ribonucleoprotein complex	GO:0003723;GO:0003724;GO:0003729;GO:0004386;GO:0005524	ATP binding;helicase activity;mRNA binding;RNA binding;RNA helicase activity
Tb927.2.4230:mRNA-p1;Tb11.v5.0827.1-p1	Tb927.2.4230:mRNA-p1	Tb927.2.4230	NUP-1 protein, putative	0.256598	0.41975	2.35214	5.23186	2.45848	5.60743	1.84684	3.30405	1.93402	3.58088	3.21989	10.0239	3.28066	10.328	3.59328	6.14998	0.145267	-0.224651						+		+	+	+			+	+	+	+	+	+	N/A	N/A	N/A	N/A	N/A	N/A	GO:0005634;GO:0005652	nuclear lamina;nucleus	N/A	N/A
Tb11.02.5410b:mRNA-p1;Tb11.02.5410:mRNA-p1	Tb11.02.5410b:mRNA-p1;Tb11.02.5410:mRNA-p1	Tb11.02.5410b;Tb11.02.5410	ubiquitin activating enzyme (E1) subunit Aos1, putative;ubiquitin activating enzyme, putative	0.737086	0.417283	0.186868	0.415009	1.98464	-1.52215	2.61304	-1.25457	3.0828	-2.48588	2.61274	-2.41782	1.36817	-1.41734	2.00357	-1.97101	1.69064	-1.53103																			N/A	N/A	GO:0008641	ubiquitin-like modifier activating enzyme activity	N/A	N/A	GO:0005737;GO:0031510	cytoplasm;SUMO activating enzyme complex	GO:0003824;GO:0005515;GO:0008641;GO:0019948	catalytic activity;protein binding;SUMO activating enzyme activity;ubiquitin-like modifier activating enzyme activity
Tb927.6.2000:mRNA-p1	Tb927.6.2000:mRNA-p1	Tb927.6.2000	spliceosome-associated protein, putative	0.16805	0.388286	0.481343	-0.74729	1.30545	-1.16964	0.472584	-0.697005	0.838042	-1.50402	1.55742	-1.43192	1.34909	-1.14641	1.29112	-1.23072	0.40417	-0.47938																			GO:0005634	nucleus	N/A	N/A	N/A	N/A	GO:0005634;GO:0005654;GO:0005684;GO:0005686;GO:0071011;GO:0071013	catalytic step 2 spliceosome;nucleoplasm;nucleus;precatalytic spliceosome;U2 snRNP;U2-type spliceosomal complex	N/A	N/A
Tb927.11.2600:mRNA-p1	Tb927.11.2600:mRNA-p1	Tb927.11.2600	hypothetical protein, conserved	0.363221	0.3877	2.3414	6.05973	0.262495	0.466961	0.673917	-1.3687	1.05769	-1.43219	1.08548	-2.08915	0.888588	-1.22943	1.31344	-1.60452	1.09057	-1.39802						+													N/A	N/A	N/A	N/A	N/A	N/A	GO:0005634;GO:0005643;GO:0005654	nuclear pore;nucleoplasm;nucleus	N/A	N/A
Tb927.10.8710:mRNA-p1	Tb927.10.8710:mRNA-p1	Tb927.10.8710	centrin-3	0.246523	0.381496	0.0901924	0.39405	0.55476	-0.48623	0.524229	-0.604405	1.20153	-1.2314	1.3143	-1.19276	0.459003	-0.698581	0.555826	-0.943696	1.80743	3.17769																			N/A	N/A	GO:0005509	calcium ion binding	N/A	N/A	GO:0005737;GO:0005929;GO:0005930	axoneme;cilium;cytoplasm	GO:0005509;GO:0005515	calcium ion binding;protein binding
Tb927.11.6340:mRNA-p1	Tb927.11.6340:mRNA-p1	Tb927.11.6340	PUB domain containing protein, putative	0.132613	0.365177	1.28062	-1.49365	0.324261	-0.395752	1.16012	-1.66551	0.817932	-0.955023	1.54045	-2.63332	0.940145	-1.00118	0.136439	0.529048	0.303169	-0.636833																			N/A	N/A	N/A	N/A	N/A	N/A	GO:0005654;GO:0005737;GO:0097014	ciliary plasm;cytoplasm;nucleoplasm	N/A	N/A
Tb927.2.4390:mRNA-p1	Tb927.2.4390:mRNA-p1	Tb927.2.4390	double-strand break repair protein MRE11	0.124992	0.354292	0.140503	0.831765	0.211567	-0.466877	0.219948	-0.65064	0.887881	-1.72573	0.210988	-0.470587	0.41721	-0.870649	0.73862	-1.09627	0.277778	-0.576763																			GO:0005634	nucleus	GO:0004519;GO:0016787;GO:0030145	endonuclease activity;hydrolase activity;manganese ion binding	GO:0006302	double-strand break repair	GO:0005634;GO:0005654	nucleoplasm;nucleus	GO:0003684;GO:0016787	damaged DNA binding;hydrolase activity
Tb927.8.5120:mRNA-p1	Tb927.8.5120:mRNA-p1	Tb927.8.5120	cytochrome c	0.102181	0.346762	0.580496	-1.44958	0.1502	0.427443	0.343569	-1.03213	0.480598	-1.19749	0.439963	-1.01784	0.0725174	-0.282327	0.112483	0.44334	0.343902	-0.60991																			GO:0070469	respirasome	GO:0009055;GO:0020037;GO:0046872	electron transfer activity;heme binding;metal ion binding	N/A	N/A	GO:0005737;GO:0005739;GO:0005758;GO:0031981;GO:0097014	ciliary plasm;cytoplasm;mitochondrial intermembrane space;mitochondrion;nuclear lumen	GO:0009055	electron transfer activity
Tb927.11.3890:mRNA-p1	Tb927.11.3890:mRNA-p1	Tb927.11.3890	N(2), N(2)-dimethylguanosine tRNA methyltransferase, putative	0.152241	0.34292	0.184522	-0.849565	0.222432	-0.723339	0.0974371	-0.327652	0.908492	-2.16542	0.631172	-1.48169	0.562233	-1.37239	0.796876	-1.56595	0.102546	-0.241063																			N/A	N/A	GO:0003723;GO:0004809	RNA binding;tRNA (guanine-N2-)-methyltransferase activity	GO:0008033	tRNA processing	GO:0005634;GO:0031981	nuclear lumen;nucleus	GO:0003723;GO:0004809	RNA binding;tRNA (guanine-N2-)-methyltransferase activity
Tb927.7.4220:mRNA-p1	Tb927.7.4220:mRNA-p1	Tb927.7.4220	WD domain, G-beta repeat/Dip2/Utp12 Family, putative	0.188923	0.338329	0.158723	0.745694	2.04893	2.59148	0.744277	-1.07407	0.725771	-0.753454	0.956201	-0.93471	0.133463	-0.198407	0.418972	-0.887872	0.210301	-0.358212																			N/A	N/A	GO:0005515	protein binding	N/A	N/A	GO:0005634;GO:0005730;GO:0005739	mitochondrion;nucleolus;nucleus	N/A	N/A
Tb927.8.5090:mRNA-p1;Tb11.v5.0723.1-p1	Tb927.8.5090:mRNA-p1	Tb927.8.5090	DNA-directed RNA polymerase I largest subunit	0.458311	0.337296	0.793596	-0.664254	0.132869	-0.114148	1.41972	-0.883097	1.74775	-1.40504	1.95596	-1.35634	0.593534	0.346843	0.281912	-0.37263	0.564375	-0.568116																			N/A	N/A	GO:0003677;GO:0003899;GO:0008270	DNA binding;DNA-directed 5'-3' RNA polymerase activity;zinc ion binding	GO:0006351	transcription, DNA-templated	GO:0005634;GO:0005654;GO:0005730;GO:0005736	nucleolus;nucleoplasm;nucleus;RNA polymerase I complex	GO:0003899	DNA-directed 5'-3' RNA polymerase activity
Tb927.9.5880.2:mRNA-p1;Tb927.9.5880.1:mRNA-p1	Tb927.9.5880.2:mRNA-p1;Tb927.9.5880.1:mRNA-p1	Tb927.9.5880	pre-mRNA splicing factor, putative;pre-mRNA splicing factor, putative	0.127151	0.31458	1.1807	2.5634	1.57863	3.18043	0.887243	-1.64691	1.0184	-1.77418	0.992015	1.7881	0.398936	-0.905378	1.23408	-2.05643	0.652803	-0.821029																+			GO:0005681	spliceosomal complex	N/A	N/A	GO:0000398	mRNA splicing, via spliceosome	GO:0000974;GO:0005634;GO:0005654	nucleoplasm;nucleus;Prp19 complex	N/A	N/A
Tb927.8.5710:mRNA-p1	Tb927.8.5710:mRNA-p1	Tb927.8.5710	recombination initiation protein NBS1, putative	0.0689218	0.308367	0.633304	-0.994831	0.206919	-0.343532	1.00907	-1.55322	1.15706	-1.96354	1.50807	-2.51107	0.667069	-0.950534	0.022172	-0.130893	0.580595	1.64644																			GO:0030870	Mre11 complex	GO:0005515	protein binding	GO:0006302;GO:0007095	double-strand break repair;mitotic G2 DNA damage checkpoint signaling	GO:0005737;GO:0030133;GO:0030870	cytoplasm;Mre11 complex;transport vesicle	GO:0003684	damaged DNA binding
Tb927.11.1080:mRNA-p1	Tb927.11.1080:mRNA-p1	Tb927.11.1080	Nucleolar protein 60	0.160672	0.302264	0.189955	-0.43015	0.948009	-1.59023	1.13788	-1.55175	1.44706	-2.08583	0.373245	-0.635697	0.442906	-0.690935	1.72876	-1.69743	0.170428	0.225891																			N/A	N/A	N/A	N/A	N/A	N/A	GO:0005634;GO:0005730;GO:0005819	nucleolus;nucleus;spindle	N/A	N/A
Tb927.11.1960:mRNA-p1	Tb927.11.1960:mRNA-p1	Tb927.11.1960	leucine-rich repeat protein (LRRP), putative	0.2232	0.290275	0.689735	0.781849	0.114164	0.146714	0.102387	0.204418	0.026302	-0.125524	1.32954	-1.52848	1.4546	1.66315	1.1949	1.05939	1.82855	4.26229																			N/A	N/A	GO:0005515	protein binding	N/A	N/A	GO:0005737;GO:0005930	axoneme;cytoplasm	N/A	N/A
Tb927.10.13970:mRNA-p1	Tb927.10.13970:mRNA-p1	Tb927.10.13970	uracil-DNA glycosylase, putative	0.143792	0.274264	0.586645	-0.968484	0.626907	-0.955625	0.211909	-0.730071	0.587661	-0.900534	0.832712	-1.90876	0.191106	-0.346007	0.93026	-1.92774	0.514794	-0.716385																			GO:0005739	mitochondrion	GO:0004844;GO:0016799	hydrolase activity, hydrolyzing N-glycosyl compounds;uracil DNA N-glycosylase activity	GO:0006281;GO:0006284	base-excision repair;DNA repair	GO:0005654;GO:0031981	nuclear lumen;nucleoplasm	GO:0004844	uracil DNA N-glycosylase activity
Tb927.11.3980:mRNA-p1	Tb927.11.3980:mRNA-p1	Tb927.11.3980	metallo-peptidase, Clan ME, Family M16	0.210955	0.267109	0.709493	-0.86698	0.43684	-0.523885	0.441655	-0.395777	0.0349284	-0.0844768	1.5283	-1.73727	2.11482	2.21726	0.805966	-0.727195	1.26535	-0.686856																		+	N/A	N/A	GO:0004222;GO:0046872	metal ion binding;metalloendopeptidase activity	N/A	N/A	GO:0005737;GO:0005739;GO:0030133	cytoplasm;mitochondrion;transport vesicle	GO:0004222	metalloendopeptidase activity
Tb927.1.4100:mRNA-p1	Tb927.1.4100:mRNA-p1	Tb927.1.4100	cytochrome oxidase subunit IV	0.352678	0.261967	0.50495	-0.599034	0.179976	-0.229657	0.334716	-0.304657	1.78721	-1.93739	1.33048	-1.68078	0.414843	0.278014	0.861057	-0.88646	0.539051	-0.513394																			N/A	N/A	N/A	N/A	N/A	N/A	GO:0005739;GO:0005751	mitochondrial respiratory chain complex IV;mitochondrion	GO:0004129	cytochrome-c oxidase activity
Tb10.v4.0033:mRNA-p1;Tb927.10.4430:mRNA-p1;Tb11.v5.0767.1-p1	Tb10.v4.0033:mRNA-p1;Tb927.10.4430:mRNA-p1;Tb11.v5.0767.1-p1	Tb10.v4.0033;Tb927.10.4430;Tb11.v5.0767	pumillo RNA binding protein PUF1;pumillo RNA binding protein PUF1, putative;pumillo RNA binding protein PUF1	0.257294	0.261342	1.76464	-1.75778	1.54789	-1.5527	0.693422	-1.10314	2.28792	2.72902	3.59811	1.85247	2.68611	1.37138	4.71766	1.76148	3.37029	2.12781	+	+							+	+			+	+	+	+		+	N/A	N/A	GO:0003723	RNA binding	N/A	N/A	GO:0005737;N/A	cytoplasm;N/A	GO:0003723;GO:0003729;N/A	mRNA binding;N/A;RNA binding
Tb927.10.450:mRNA-p1	Tb927.10.450:mRNA-p1	Tb927.10.450	Component of motile flagella 62	0.0708371	0.24396	0.445885	-1.05032	0.0969487	0.380142	0.107247	-0.287613	0.182542	-0.818831	0.185215	-0.555502	0.204765	-0.530231	0.468585	1.14001	0.0207075	0.0693951																			N/A	N/A	GO:0008017	microtubule binding	N/A	N/A	GO:0030992;GO:0036064	ciliary basal body;intraciliary transport particle B	N/A	N/A
Tb927.11.670:mRNA-p1;Tb11.0890:mRNA-p1	Tb927.11.670:mRNA-p1;Tb11.0890:mRNA-p1	Tb927.11.670;Tb11.0890	epsin, putative;epsinR	0.0706094	0.239027	1.11357	-1.56521	0.643966	-0.886128	0.144799	0.253354	0.238801	-0.580972	1.2387	-1.78251	0.469279	-0.68745	1.66454	-1.74392	0.181566	0.649644																			N/A	N/A	N/A	N/A	N/A	N/A	GO:0005768;GO:0005829;GO:0005886;GO:0010008;GO:0020016;GO:0030125;GO:0030132;GO:0030133;GO:0043231;N/A	ciliary pocket;clathrin coat of coated pit;clathrin vesicle coat;cytosol;endosome;endosome membrane;intracellular membrane-bounded organelle;N/A;plasma membrane;transport vesicle	GO:0005543;GO:0030276;N/A	clathrin binding;N/A;phospholipid binding
Tb927.10.3880:mRNA-p1	Tb927.10.3880:mRNA-p1	Tb927.10.3880	hypothetical protein, conserved	0.523809	0.226166	1.88097	-1.16303	0.125805	0.282995	0.0644119	0.0737867	1.83221	-1.03598	2.40092	-1.29849	0.555516	-0.228284	0.930585	1.42134	0.802313	-0.553984																			GO:0016021	integral component of membrane	N/A	N/A	N/A	N/A	GO:0005737	cytoplasm	N/A	N/A
Tb927.1.1890:mRNA-p1	Tb927.1.1890:mRNA-p1	Tb927.1.1890	Replication Factor C Subunit 1-related protein	0.0855388	0.224843	1.25529	-1.78434	1.08587	-1.45254	0.836388	-1.48568	1.12124	-1.8182	1.52776	-2.25781	1.17549	-1.64328	0.0877513	-0.301932	0.556905	-0.905746																			N/A	N/A	N/A	N/A	N/A	N/A	GO:0005634;GO:0005654;GO:0005737	cytoplasm;nucleoplasm;nucleus	GO:0003677	DNA binding
Tb927.7.7050:mRNA-p1	Tb927.7.7050:mRNA-p1	Tb927.7.7050	hypothetical protein, conserved	0.056765	0.217315	0.707568	-1.34857	0.117203	0.273494	0.850118	-1.68168	0.691861	-1.33645	0.127743	-0.364534	0.041923	-0.103524	0.728162	-1.12168	0.259109	-0.562738																			N/A	N/A	N/A	N/A	N/A	N/A	GO:0005730	nucleolus	N/A	N/A
Tb927.9.2120:mRNA-p1	Tb927.9.2120:mRNA-p1	Tb927.9.2120	hypothetical protein, conserved	0.135454	0.217231	1.66877	-4.0571	1.78361	-3.81225	1.92825	-4.32896	1.9321	-4.60436	1.98306	-4.60949	1.90805	-4.94733	0.417239	0.629524	0.650793	-0.977817																			N/A	N/A	N/A	N/A	N/A	N/A	GO:0005634;GO:0005730	nucleolus;nucleus	N/A	N/A
Tb927.11.3790:mRNA-p1	Tb927.11.3790:mRNA-p1	Tb927.11.3790	hypothetical protein, conserved	0.123042	0.194146	0.481079	-0.545657	0.432689	-0.617065	0.643218	-1.84787	1.68811	-2.11978	1.01395	1.15339	0.903432	1.05204	0.930138	-1.38747	0.487444	-0.5972																+			N/A	N/A	N/A	N/A	N/A	N/A	GO:0005634;GO:0005643;GO:0005737	cytoplasm;nuclear pore;nucleus	N/A	N/A
Tb927.10.3990:mRNA-p1	Tb927.10.3990:mRNA-p1	Tb927.10.3990	DHH1	0.111652	0.193975	0.672098	-1.14053	0.0923887	-0.217826	0.732133	-1.34099	0.370433	-0.765906	0.564354	-1.23182	0.134038	-0.297239	0.623554	-1.05042	0.0631655	-0.204831																			N/A	N/A	GO:0003676;GO:0004386;GO:0005524	ATP binding;helicase activity;nucleic acid binding	N/A	N/A	GO:0000932;GO:0005737;GO:0010494	cytoplasm;cytoplasmic stress granule;P-body	GO:0003729;GO:0004386;GO:0005524	ATP binding;helicase activity;mRNA binding
Tb927.2.3160:mRNA-p1	Tb927.2.3160:mRNA-p1	Tb927.2.3160	Gar1/Naf1 RNA binding region, putative	0.062234	0.190376	2.04343	5.23726	1.88972	3.48798	0.778727	-1.41124	0.791608	-1.28449	0.762145	-1.35493	0.519994	-0.824689	1.27474	-1.62698	0.866071	-0.99403						+													GO:0005732	sno(s)RNA-containing ribonucleoprotein complex	GO:0003723	RNA binding	GO:0000493;GO:0001522;GO:0042254	box H/ACA snoRNP assembly;pseudouridine synthesis;ribosome biogenesis	GO:0005634;GO:0005730;GO:0005732;GO:0005737	cytoplasm;nucleolus;nucleus;sno(s)RNA-containing ribonucleoprotein complex	GO:0003723	RNA binding
Tb927.5.1270:mRNA-p1	Tb927.5.1270:mRNA-p1	Tb927.5.1270	Acidic leucine-rich nuclear phosphoprotein 32 family member	0.0528778	0.174071	0.0373238	0.123146	0.0444445	-0.149048	0.192044	-0.681064	0.605583	-1.68626	0.338893	-1.21535	0.369141	-1.02014	0.916214	-1.68044	0.54399	-1.16943																			N/A	N/A	N/A	N/A	N/A	N/A	GO:0031981	nuclear lumen	GO:0042393	histone binding
Tb927.9.8200:mRNA-p1;Tb11.v5.0687.1-p1	Tb927.9.8200:mRNA-p1;Tb11.v5.0687.1-p1	Tb927.9.8200;Tb11.v5.0687	Pescadillo N-terminus/BRCA1 C Terminus (BRCT) domain containing protein, putative;Pescadillo N-terminus/BRCA1 C Terminus (BRCT) domain containing protein, putative	0.0862861	0.173201	0.542385	-1.16538	0.792775	-1.09326	1.0642	-1.38321	1.55799	-2.1624	0.726472	-1.2171	0.764892	-1.0292	2.21572	-2.23021	0.930896	-0.983257																			GO:0005654;GO:0005730;GO:0030687	nucleolus;nucleoplasm;preribosome, large subunit precursor	GO:0043021;N/A	N/A;ribonucleoprotein complex binding	GO:0000466;GO:0042254	maturation of 5.8S rRNA from tricistronic rRNA transcript (SSU-rRNA, 5.8S rRNA, LSU-rRNA);ribosome biogenesis	GO:0005634;GO:0005730;GO:0070545;N/A	N/A;nucleolus;nucleus;PeBoW complex	GO:0003723;N/A	N/A;RNA binding
Tb927.1.1640:mRNA-p1;Tb11.v5.0426.1-p1	Tb927.1.1640:mRNA-p1;Tb11.v5.0426.1-p1	Tb927.1.1640;Tb11.v5.0426	hypothetical protein, conserved;hypothetical protein, conserved	0.0603752	0.173174	0.203641	0.917657	0.929476	-1.11124	0.866852	-1.69751	1.16407	-1.29743	0.00347864	-0.0170091	1.19882	-1.39895	0.955997	-1.54949	0.814781	-0.776616																			N/A	N/A	N/A	N/A	N/A	N/A	GO:0005654;GO:0005737	cytoplasm;nucleoplasm	N/A	N/A
Tb927.11.8290:mRNA-p1;Tb11.v5.1053.1-p1	Tb927.11.8290:mRNA-p1	Tb927.11.8290	DIS3-like exonuclease, putative	0.163652	0.158489	0.392324	-0.612327	0.689309	-0.837653	0.925456	-1.16521	1.58136	-1.71229	1.12832	-0.957049	1.59967	-1.51968	0.566223	-0.997752	0.762248	1.74163																			N/A	N/A	GO:0003723;GO:0004540	ribonuclease activity;RNA binding	N/A	N/A	GO:0000178;GO:0000932;GO:0005737	cytoplasm;exosome (RNase complex);P-body	GO:0000175	3'-5'-exoribonuclease activity
Tb927.3.1800:mRNA-p1	Tb927.3.1800:mRNA-p1	Tb927.3.1800	hypothetical protein, conserved	0.046799	0.150338	0.215791	-0.707293	0.151683	-0.308365	0.0809398	-0.172791	0.620465	-1.05938	0.617838	-1.05801	0.724798	-1.39793	1.00368	-1.36084	0.480205	-0.85671																			N/A	N/A	N/A	N/A	N/A	N/A	GO:0005634;GO:0005654;GO:0048188	nucleoplasm;nucleus;Set1C/COMPASS complex	N/A	N/A
Tb927.5.4270:mRNA-p1	Tb927.5.4270:mRNA-p1	Tb927.5.4270	ATP-dependent DEAD/H RNA helicase, putative	0.294769	0.118733	2.25383	-3.09757	1.39331	-1.69782	0.808817	-2.07891	2.16951	-1.37908	1.70049	-3.26052	1.89897	-1.30722	2.42753	-1.94925	1.76941	-1.68927																			N/A	N/A	GO:0003676;GO:0003723;GO:0004386;GO:0005524	ATP binding;helicase activity;nucleic acid binding;RNA binding	N/A	N/A	GO:0005634;GO:0005730	nucleolus;nucleus	GO:0004386;GO:0005524	ATP binding;helicase activity
Tb927.11.5470:mRNA-p1	Tb927.11.5470:mRNA-p1	Tb927.11.5470	hypothetical protein, conserved	0.0287377	0.116109	0.979469	-2.59907	0.186274	-0.526091	0.311987	-1.08194	0.798014	-1.77961	0.550913	-1.25628	0.591545	-1.33696	0.179414	-0.486512	0.465617	-1.03662																			N/A	N/A	N/A	N/A	N/A	N/A	GO:0005654	nucleoplasm	N/A	N/A
Tb927.10.3200:mRNA-p1	Tb927.10.3200:mRNA-p1	Tb927.10.3200	U2 splicing auxiliary factor, putative	0.0194311	0.107684	0.588849	-4.13923	0.842568	-4.62831	0.986971	-5.81063	1.09259	-6.11828	1.14676	-6.50274	0.940768	-5.29255	0.229043	1.07387	0.167093	-0.851992																			GO:0089701	U2AF complex	GO:0003676;GO:0003723;GO:0008270;GO:0046872	metal ion binding;nucleic acid binding;RNA binding;zinc ion binding	GO:0000398	mRNA splicing, via spliceosome	GO:0005634;GO:0005654;GO:0005681;GO:0016607;GO:0089701	nuclear speck;nucleoplasm;nucleus;spliceosomal complex;U2AF complex	GO:0003723;GO:0003729;GO:0030628	mRNA binding;pre-mRNA 3'-splice site binding;RNA binding
Tb927.8.4660:mRNA-p1;Tb11.v5.0863.1-p1	Tb927.8.4660:mRNA-p1	Tb927.8.4660	hypothetical protein, conserved	0.0252932	0.102807	1.00261	-1.56363	0.750354	-1.31705	0.521473	-0.834221	1.84252	4.07025	0.170829	-0.650366	1.02992	1.62674	0.102971	0.264851	1.11546	-1.43865													+	+					N/A	N/A	N/A	N/A	N/A	N/A	GO:0005643;GO:0005654;GO:0005737	cytoplasm;nuclear pore;nucleoplasm	GO:0005049	nuclear export signal receptor activity
Tb927.10.6060:mRNA-p1;Tb11.v5.0199.1-p1	Tb927.10.6060:mRNA-p1;Tb11.v5.0199.1-p1	Tb927.10.6060;Tb11.v5.0199	universal minicircle sequence binding protein, putative;universal minicircle sequence binding protein 2	0.089999	0.096501	0.736529	-3.27602	2.58367	-3.85084	1.70699	-3.4736	0.945552	-4.21155	1.90236	-2.76902	1.09678	-1.12984	1.00033	1.20577	0.0925613	-0.0968513																			N/A	N/A	GO:0003676;GO:0008270	nucleic acid binding;zinc ion binding	N/A	N/A	GO:0005634;GO:0005654;GO:0005737	cytoplasm;nucleoplasm;nucleus	GO:0003676;GO:0003727;GO:0003729;GO:0043047;GO:0045182	mRNA binding;nucleic acid binding;single-stranded RNA binding;single-stranded telomeric DNA binding;translation regulator activity
Tb927.11.10280:mRNA-p1	Tb927.11.10280:mRNA-p1	Tb927.11.10280	metallo-peptidase, Clan MC, Family M14, putative	0.027494	0.0953897	1.32874	-2.21977	1.29611	-2.1475	1.22765	-2.101	1.14165	-2.79186	1.53109	-2.80799	1.4667	-2.50543	0.0505679	0.149435	1.60207	-1.93331																			N/A	N/A	GO:0004181;GO:0008270	metallocarboxypeptidase activity;zinc ion binding	GO:0006508	proteolysis	GO:0005737	cytoplasm	N/A	N/A
Tb927.2.1800:mRNA-p1	Tb927.2.1800:mRNA-p1	Tb927.2.1800	DNA polymerase delta catalytic subunit, putative	0.0271554	0.072649	0.0526158	-0.232009	0.124176	-0.277494	0.122388	-0.360427	1.07716	-2.10628	0.541211	-1.12639	0.264693	-0.6534	0.200359	-0.422078	0.340055	0.929732																			N/A	N/A	GO:0000166;GO:0003676;GO:0003677;GO:0003887;GO:0046872;GO:0051539	4 iron, 4 sulfur cluster binding;DNA binding;DNA-directed DNA polymerase activity;metal ion binding;nucleic acid binding;nucleotide binding	N/A	N/A	GO:0005654;GO:0005737;GO:0043625	cytoplasm;delta DNA polymerase complex;nucleoplasm	GO:0003887;GO:0008296	3'-5'-exodeoxyribonuclease activity;DNA-directed DNA polymerase activity
Tb927.7.2680:mRNA-p1	Tb927.7.2680:mRNA-p1	Tb927.7.2680	zinc finger protein family member, putative	0.0266359	0.0626208	0.381158	0.60815	0.597846	-0.951046	0.942408	-2.07128	0.46356	0.921942	0.19802	-0.335642	0.558283	1.01296	1.08635	-1.31462	1.26974	2.55408																			N/A	N/A	GO:0046872	metal ion binding	N/A	N/A	GO:0005730;GO:0005737	cytoplasm;nucleolus	GO:0003723	RNA binding
Tb927.7.7130:mRNA-p1	Tb927.7.7130:mRNA-p1	Tb927.7.7130	S-adenosyl-L-methionine-dependent tRNA 4-demethylwyosine synthase, putative	0.0138325	0.0464554	0.161425	-0.243907	0.833194	-0.93414	0.710692	-1.42328	0.905691	-1.72254	0.651683	-0.850974	0.488563	-0.698929	0.0344902	-0.144222	1.51277	-1.24159																			GO:0016021	integral component of membrane	GO:0003824;GO:0010181;GO:0016829;GO:0051536;GO:0051539	4 iron, 4 sulfur cluster binding;catalytic activity;FMN binding;iron-sulfur cluster binding;lyase activity	GO:0008033	tRNA processing	GO:0005737	cytoplasm	N/A	N/A
Tb927.8.4540:mRNA-p1	Tb927.8.4540:mRNA-p1	Tb927.8.4540	PAB1-binding protein , putative	0.0156858	0.0450706	1.35883	-1.5244	0.5898	-0.740125	0.820396	-1.27036	0.0940651	-0.154228	0.519045	-0.552859	0.81296	-0.844806	0.521019	0.739283	1.76867	5.11874																			N/A	N/A	N/A	N/A	N/A	N/A	GO:0005737;GO:0005829;GO:0005844;GO:0010494	cytoplasm;cytoplasmic stress granule;cytosol;polysome	GO:0003723;GO:0003729;GO:0030674	mRNA binding;protein-macromolecule adaptor activity;RNA binding
Tb927.8.4450:mRNA-p1	Tb927.8.4450:mRNA-p1	Tb927.8.4450	RNA-binding protein, putative	0.0195115	0.0373224	0.911835	-1.74449	1.25991	-2.39692	0.841788	-2.05577	1.49936	-3.12234	1.65407	-3.42462	1.11263	-2.07526	0.684639	-1.57051	1.38979	-2.23067																			N/A	N/A	GO:0003676	nucleic acid binding	N/A	N/A	GO:0005634;GO:0005730	nucleolus;nucleus	GO:0003723	RNA binding
Tb927.3.1120:mRNA-p1	Tb927.3.1120:mRNA-p1	Tb927.3.1120	GTP-binding nuclear protein rtb2, putative	0.00973967	0.0340544	0.0756006	-0.274682	1.08798	-1.37001	1.86709	2.69007	1.66331	3.07661	0.728567	-1.18081	2.19911	3.29489	1.64918	-2.13118	1.40255	-1.63767													+	+				+	N/A	N/A	GO:0003924;GO:0005525	GTP binding;GTPase activity	GO:0006913	nucleocytoplasmic transport	GO:0005634;GO:0005643;GO:0005737	cytoplasm;nuclear pore;nucleus	GO:0003924;GO:0005525	GTP binding;GTPase activity
Tb927.11.2760:mRNA-p1	Tb927.11.2760:mRNA-p1	Tb927.11.2760	hypothetical protein, conserved	0.0116748	0.0329444	0.260935	0.829986	0.678781	1.20451	0.121262	-0.298937	1.10871	-1.99023	1.38937	-2.52423	0.2753	-0.50515	1.26019	-1.60449	0.592467	-0.840041																			N/A	N/A	N/A	N/A	N/A	N/A	GO:0005634;GO:0005654;GO:0005737;GO:0030133	cytoplasm;nucleoplasm;nucleus;transport vesicle	N/A	N/A
Tb927.4.4950:mRNA-p1	Tb927.4.4950:mRNA-p1	Tb927.4.4950	Nucleolar protein 61	0.0127788	0.0305131	0.919632	-1.86641	0.844565	-1.5967	0.0686735	-0.182411	1.21288	-2.23724	0.943706	-1.57522	0.0759996	-0.217225	0.164461	-0.404798	0.405875	-0.551163																			N/A	N/A	GO:0005515	protein binding	N/A	N/A	GO:0005634;GO:0005730;GO:0005819	nucleolus;nucleus;spindle	N/A	N/A
Tb927.10.1400:mRNA-p1;Tb927.10.1470:mRNA-p1	Tb927.10.1400:mRNA-p1;Tb927.10.1470:mRNA-p1	Tb927.10.1400;Tb927.10.1470	hypoxanthine-guanine phosphoribosyltransferase;hypoxanthine-guanine phosphoribosyltransferase	0.00684373	0.0190589	1.0135	-2.39876	0.372278	-0.938448	0.234972	-0.673553	0.690268	-1.7023	0.639314	-1.99206	0.44193	-0.985339	0.391617	-0.924751	0.179766	0.701673																			GO:0005737	cytoplasm	GO:0000166;GO:0004422;GO:0052657	guanine phosphoribosyltransferase activity;hypoxanthine phosphoribosyltransferase activity;nucleotide binding	GO:0006166;GO:0009116	nucleoside metabolic process;purine ribonucleoside salvage	GO:0005654;GO:0005737;GO:0005829;GO:0020015;GO:0031981;GO:0097014	ciliary plasm;cytoplasm;cytosol;glycosome;nuclear lumen;nucleoplasm	GO:0000287;GO:0004422	hypoxanthine phosphoribosyltransferase activity;magnesium ion binding
Tb927.3.2100:mRNA-p1	Tb927.3.2100:mRNA-p1	Tb927.3.2100	hypothetical protein, conserved	0.00567937	0.012647	1.08393	-1.17091	0.787818	-0.697636	0.979635	-0.967644	1.80888	-2.32778	1.52111	-2.03641	1.35831	-1.33737	0.140656	-0.378194	1.48295	1.78732																			N/A	N/A	GO:0004127;GO:0005524	ATP binding;cytidylate kinase activity	GO:0006139	nucleobase-containing compound metabolic process	GO:0005654;GO:0005737;GO:0097014	ciliary plasm;cytoplasm;nucleoplasm	N/A	N/A
Tb927.8.3150:mRNA-p1	Tb927.8.3150:mRNA-p1	Tb927.8.3150	T-complex protein 1, gamma subunit, putative	0.0962285	0.0108573	4.40322	-1.61021	2.41592	0.187954	0.0630725	-0.0443929	0.474242	-1.07371	0.129986	-0.324379	2.55071	0.661089	0.622857	-0.933097	0.17033	-0.118677																		+	N/A	N/A	GO:0005524;GO:0051082	ATP binding;unfolded protein binding	GO:0006457	protein folding	GO:0005737;GO:0005832	chaperonin-containing T-complex;cytoplasm	GO:0051082	unfolded protein binding
Tb927.8.1980:mRNA-p1	Tb927.8.1980:mRNA-p1	Tb927.8.1980	Beta propeller protein 1	0.00161298	0.00368309	0.0785852	-0.211988	0.150566	-0.339932	0.236358	-0.741441	0.180852	-0.599325	0.356867	-0.730293	0.216149	-0.528849	0.820029	-1.32752	0.459556	-0.769054																			GO:0005730	nucleolus	GO:0005515	protein binding	GO:0006364	rRNA processing	GO:0005634;GO:0005730;GO:0005739;GO:0020016;GO:0120267	ciliary pocket;mitochondrion;nucleolus;nucleus;pellicular membrane	N/A	N/A
Tb927.11.14250:mRNA-p1	Tb927.11.14250:mRNA-p1	Tb927.11.14250	T-complex protein 1, epsilon subunit, putative	7e-05	0.000139872	1.12858	2.48731	1.99527	2.41627	0.243158	-0.846535	2.52527	3.48881	1.71226	1.78731	2.34778	2.9965	2.22721	1.65028	2.54296	4.35287		+								+			+	+	+	+		+	N/A	N/A	GO:0005524;GO:0051082	ATP binding;unfolded protein binding	GO:0006457	protein folding	GO:0005737;GO:0005832	chaperonin-containing T-complex;cytoplasm	GO:0051082	unfolded protein binding
Tb927.9.14370:mRNA-p1;Tb927.8.6180:mRNA-p1	Tb927.9.14370:mRNA-p1;Tb927.8.6180:mRNA-p1	Tb927.9.14370;Tb927.8.6180	60S ribosomal protein L26, putative;60S ribosomal protein L26, putative	0.00207539	-0.00323296	2.76901	-6.29284	2.42991	-5.90357	1.91028	-5.27021	2.97929	-7.52205	2.76748	-6.41771	2.8325	-6.70458	0.566197	0.784282	0.705222	-2.96449																			GO:0015934	large ribosomal subunit	GO:0003723;GO:0003735	RNA binding;structural constituent of ribosome	GO:0006412	translation	GO:0005730;GO:0005737;GO:0022625;GO:0031981;GO:0097014	ciliary plasm;cytoplasm;cytosolic large ribosomal subunit;nuclear lumen;nucleolus	GO:0003723;GO:0003735	RNA binding;structural constituent of ribosome
Tb927.6.2640:mRNA-p1	Tb927.6.2640:mRNA-p1	Tb927.6.2640	importin alpha subunit, putative	0.00526933	-0.0131798	0.255778	-0.526617	0.315729	0.40538	1.91648	-1.76016	1.57888	-1.72003	2.22995	-1.8452	0.113047	0.370395	1.84145	-1.05289	0.684404	1.09264																			GO:0005737	cytoplasm	GO:0005515;GO:0061608	nuclear import signal receptor activity;protein binding	GO:0006606	protein import into nucleus	GO:0005634;GO:0005643;GO:0005654;GO:0005730	nuclear pore;nucleolus;nucleoplasm;nucleus	GO:0008139;GO:0061608	nuclear import signal receptor activity;nuclear localization sequence binding
Tb927.3.1140:mRNA-p1	Tb927.3.1140:mRNA-p1	Tb927.3.1140	Surp module, putative	0.0106588	-0.0289046	0.528839	-1.06662	0.141711	-0.352617	0.287104	-0.605501	0.82429	-1.645	0.324811	-0.731108	0.184539	-0.457553	0.0169344	-0.0398941	0.13678	-0.27377																			N/A	N/A	GO:0003723	RNA binding	GO:0006396	RNA processing	GO:0005634;GO:0005654;GO:0005686;GO:0071004;GO:0071013	catalytic step 2 spliceosome;nucleoplasm;nucleus;U2 snRNP;U2-type prespliceosome	GO:0003723	RNA binding
Tb927.7.7450:mRNA-p1	Tb927.7.7450:mRNA-p1	Tb927.7.7450	GTP-binding protein, putative	0.0127729	-0.0343075	0.913792	-1.45043	0.145288	-0.270951	0.549221	-1.00977	0.887156	-1.80081	1.29772	-2.3122	0.699593	-1.13363	0.58705	-0.701749	0.833965	-1.54758																			GO:0005730	nucleolus	GO:0005525	GTP binding	N/A	N/A	GO:0005634;GO:0005730;GO:0005739	mitochondrion;nucleolus;nucleus	N/A	N/A
Tb927.11.10330:mRNA-p1	Tb927.11.10330:mRNA-p1	Tb927.11.10330	regulator of chromosome condensation 1-like protein	0.0183763	-0.0364615	0.0135486	0.0403852	0.2101	0.476846	0.261325	-0.570907	0.673179	-1.45738	0.099246	-0.252933	0.014652	-0.040556	0.652126	-1.04517	0.235863	0.466035																			N/A	N/A	N/A	N/A	N/A	N/A	GO:0005634;GO:0005654;GO:0005730;GO:0031010	ISWI-type complex;nucleolus;nucleoplasm;nucleus	GO:0000976	transcription cis-regulatory region binding
Tb927.10.2120:mRNA-p1	Tb927.10.2120:mRNA-p1	Tb927.10.2120	U1 small nuclear ribonucleoprotein C, putative	0.0110688	-0.0436153	0.293255	-1.02474	0.0867389	0.382995	0.33881	-1.11176	0.674609	-1.98146	0.209158	-0.729393	0.210507	-0.70614	0.526226	-1.21648	0.197707	-0.51705																			N/A	N/A	N/A	N/A	N/A	N/A	GO:0005654;GO:0005685;GO:0005829	cytosol;nucleoplasm;U1 snRNP	GO:0003729;GO:0008270	mRNA binding;zinc ion binding
Tb927.2.5980:mRNA-p1	Tb927.2.5980:mRNA-p1	Tb927.2.5980	chaperone protein ClpB1, putative	0.017994	-0.0451247	0.963605	-1.61856	0.591932	-1.08875	0.805267	-1.60165	1.74256	-2.84641	1.10611	-1.65936	0.715585	-0.911554	1.24724	-1.23122	1.82536	2.81599																			N/A	N/A	GO:0005524;GO:0008233;GO:0016887	ATP binding;ATP hydrolysis activity;peptidase activity	N/A	N/A	GO:0005654;GO:0005737;GO:0005886	cytoplasm;nucleoplasm;plasma membrane	GO:0016887	ATP hydrolysis activity
Tb927.10.2310:mRNA-p1	Tb927.10.2310:mRNA-p1	Tb927.10.2310	hypothetical protein, conserved	0.0129934	-0.0459906	0.943361	-2.02703	0.958675	-1.67757	1.12528	-1.9877	0.998554	-1.81121	0.936567	-1.61738	1.10305	-1.85208	0.49027	-0.6469	1.20098	-1.53783																			N/A	N/A	N/A	N/A	N/A	N/A	GO:0005634;GO:0005654;GO:0005730	nucleolus;nucleoplasm;nucleus	N/A	N/A
Tb927.9.9290:mRNA-p1	Tb927.9.9290:mRNA-p1	Tb927.9.9290	polyadenylate-binding protein 1	0.0440424	-0.0481319	1.28597	-1.27642	0.528503	-0.503706	0.31457	-0.350744	2.59848	3.07581	0.0282261	0.127643	2.64754	2.59379	0.565115	-0.849618	2.01572	2.99572													+	+				+	N/A	N/A	GO:0003676;GO:0003723	nucleic acid binding;RNA binding	N/A	N/A	GO:0005634;GO:0005737;GO:0005829;GO:0005844;GO:0010494;GO:1990904	cytoplasm;cytoplasmic stress granule;cytosol;nucleus;polysome;ribonucleoprotein complex	GO:0003723;GO:0003730;GO:0008143;GO:0008266	mRNA 3'-UTR binding;poly(A) binding;poly(U) RNA binding;RNA binding
Tb927.11.14120:mRNA-p1	Tb927.11.14120:mRNA-p1	Tb927.11.14120	phenylalanyl-tRNA synthetase alpha chain, putative	0.0410954	-0.0540206	0.0122571	-0.0696014	0.321041	0.787767	0.307368	0.438199	1.55682	2.11984	1.66179	1.77442	1.40531	1.44808	0.777971	-0.981336	0.580443	-0.491134													+	+	+	+			GO:0005737	cytoplasm	GO:0000049;GO:0000166;GO:0004812;GO:0004826;GO:0005524	aminoacyl-tRNA ligase activity;ATP binding;nucleotide binding;phenylalanine-tRNA ligase activity;tRNA binding	GO:0006432;GO:0043039	phenylalanyl-tRNA aminoacylation;tRNA aminoacylation	GO:0005737;GO:0005829;GO:0009328;GO:0020023	cytoplasm;cytosol;kinetoplast;phenylalanine-tRNA ligase complex	GO:0004826	phenylalanine-tRNA ligase activity
Tb927.3.1300:mRNA-p1	Tb927.3.1300:mRNA-p1	Tb927.3.1300	hypothetical protein, conserved	0.0547291	-0.0570507	1.59453	-1.584	2.24654	-1.76669	0.981978	-2.32854	1.28372	-0.812181	0.945558	-1.9007	0.911826	-1.95615	0.609262	-0.539334	2.57917	1.81452		+																	N/A	N/A	N/A	N/A	N/A	N/A	GO:0005737;GO:0005794;GO:0012505	cytoplasm;endomembrane system;Golgi apparatus	N/A	N/A
Tb927.10.1130:mRNA-p1;Tb11.0520:mRNA-p1	Tb927.10.1130:mRNA-p1;Tb11.0520:mRNA-p1	Tb927.10.1130;Tb11.0520	dynein light chain, putative;dynein arm light chain, axonemal, putative	0.0309486	-0.0622355	0.829068	-1.6976	0.433041	-0.912249	1.04611	2.13991	1.48031	3.433	0.619389	-1.40231	0.234701	-0.554852	0.543759	-1.05161	0.375299	-0.645872													+	+					N/A	N/A	N/A	N/A	N/A	N/A	GO:0005737;GO:0005858;GO:0005930	axonemal dynein complex;axoneme;cytoplasm	GO:0003777;GO:0045504	dynein heavy chain binding;microtubule motor activity
Tb927.10.15400:mRNA-p1;Tb11.v5.0787.1-p1	Tb927.10.15400:mRNA-p1;Tb11.v5.0787.1-p1	Tb927.10.15400;Tb11.v5.0787	kinesin, putative;kinesin, putative	0.0164925	-0.0636781	0.593213	-1.46911	0.475059	-1.23589	0.450186	-1.14693	1.0232	-2.53312	1.11034	-3.2498	0.633355	-1.55743	0.16023	0.346426	0.179188	-0.513413																			N/A	N/A	GO:0003777;GO:0005524;GO:0008017	ATP binding;microtubule binding;microtubule motor activity	GO:0007018	microtubule-based movement	GO:0005737;GO:0005871;GO:0005875;GO:0051286;N/A	cell tip;cytoplasm;kinesin complex;microtubule associated complex;N/A	GO:0003774;GO:0005524;N/A	ATP binding;cytoskeletal motor activity;N/A
Tb927.1.2260:mRNA-p1	Tb927.1.2260:mRNA-p1	Tb927.1.2260	small myristoylated protein 1-2	0.0246676	-0.0736847	0.806553	-1.06733	0.134103	-0.175793	2.09013	-1.6179	0.00613848	-0.0327762	2.46134	-2.11188	0.670289	-1.05962	1.37309	-0.783489	0.732841	-0.535485																			N/A	N/A	N/A	N/A	N/A	N/A	GO:0005886;GO:0020016;GO:0051286;GO:0060170;GO:0120267	cell tip;ciliary membrane;ciliary pocket;pellicular membrane;plasma membrane	N/A	N/A
Tb927.11.13360:mRNA-p1	Tb927.11.13360:mRNA-p1	Tb927.11.13360	AAA ATPase, putative	0.0316721	-0.0741666	0.662879	-0.748302	0.0764167	0.105533	0.757212	-0.855109	0.811249	-1.16054	0.700347	-1.05288	0.647832	-0.777882	0.938181	-0.839993	0.802325	-0.680376																			N/A	N/A	GO:0005524;GO:0016887	ATP binding;ATP hydrolysis activity	N/A	N/A	GO:0005634;GO:0005654;GO:0008540	nucleoplasm;nucleus;proteasome regulatory particle, base subcomplex	GO:0016887;GO:0017025;GO:0036402	ATP hydrolysis activity;proteasome-activating activity;TBP-class protein binding
Tb927.8.5460:mRNA-p1;Tb11.v5.0797.1-p1;Tb927.8.5465:mRNA-p1;Tb927.8.5440:mRNA-p1;Tb11.v5.0798.1-p1;Tb927.8.5470:mRNA-p1	Tb927.8.5460:mRNA-p1;Tb11.v5.0797.1-p1;Tb927.8.5465:mRNA-p1;Tb927.8.5440:mRNA-p1;Tb11.v5.0798.1-p1	Tb927.8.5460;Tb11.v5.0797;Tb927.8.5465;Tb927.8.5440;Tb11.v5.0798	flagellar calcium-binding protein;flagellar calcium-binding protein;flagellar calcium-binding 24 kDa protein;Flagellar calcium-binding 44 kDa protein;flagellar calcium-binding 24 kDa protein	0.0585657	-0.0747236	0.413718	-0.8254	0.180837	-0.265921	0.312755	-0.435496	0.208981	1.03951	1.02695	-1.34233	0.295976	1.63119	1.01007	-1.26954	0.195045	-0.262865																			GO:0031514;N/A	motile cilium;N/A	GO:0005509	calcium ion binding	N/A	N/A	GO:0005737;GO:0005929;GO:0031514;GO:0031981;GO:0097014;N/A	ciliary plasm;cilium;cytoplasm;motile cilium;N/A;nuclear lumen	GO:0005509;N/A	calcium ion binding;N/A
Tb927.11.14890:mRNA-p1	Tb927.11.14890:mRNA-p1	Tb927.11.14890	DNA polymerase alpha/epsilon subunit B, putative	0.033836	-0.0755183	0.382481	-0.665736	0.450037	-0.614478	0.715212	-1.12886	1.00784	-1.65133	0.421251	-0.967323	0.347399	-0.492659	0.079801	-0.116041	0.267475	-0.342557																			N/A	N/A	GO:0003677	DNA binding	GO:0006260	DNA replication	GO:0005654;GO:0005658;GO:0005737;GO:0140525	alpha DNA polymerase:primase complex;antipodal site;cytoplasm;nucleoplasm	N/A	N/A
Tb927.9.10400:mRNA-p1	Tb927.9.10400:mRNA-p1	Tb927.9.10400	hypothetical protein, conserved	0.0236249	-0.0834891	0.0218876	0.102759	0.994252	-1.78221	0.582314	-1.03612	0.989673	-2.15135	0.538398	-0.978649	1.12204	-2.03567	1.34963	-1.87078	0.487628	-0.975882																			N/A	N/A	GO:0005515	protein binding	N/A	N/A	GO:0005634;GO:0005730	nucleolus;nucleus	GO:0003729	mRNA binding
Tb927.11.5850:mRNA-p1	Tb927.11.5850:mRNA-p1	Tb927.11.5850	RNA-binding protein 38, putative	0.0291059	-0.0891406	0.905721	-1.95424	0.436206	-1.00363	0.662394	-1.6727	1.09996	-2.47197	1.05696	-2.32757	0.624279	-1.8717	1.39932	2.2697	0.127275	0.50192																			N/A	N/A	GO:0003676	nucleic acid binding	N/A	N/A	GO:0005634;GO:0005737;GO:0005829	cytoplasm;cytosol;nucleus	GO:0003723;GO:0003729	mRNA binding;RNA binding
Tb927.11.2670:mRNA-p1	Tb927.11.2670:mRNA-p1	Tb927.11.2670	Nucleoporin NUP59	0.0264127	-0.08966	0.438939	-1.16165	0.16576	-0.221978	0.894959	-1.17235	1.24032	-1.85799	0.294589	-1.11847	0.781392	-0.939047	1.26195	-1.55293	1.49076	-1.41253																			N/A	N/A	N/A	N/A	N/A	N/A	GO:0005634;GO:0005654	nucleoplasm;nucleus	N/A	N/A
Tb927.7.6180:mRNA-p1	Tb927.7.6180:mRNA-p1	Tb927.7.6180	hypothetical protein, conserved	0.125815	-0.0914885	1.99606	-1.94089	0.423966	-0.769463	2.97859	-1.66842	3.40127	-1.80873	1.04002	-1.40294	1.73707	-0.526141	3.87414	-1.76987	0.314072	1.24792																			N/A	N/A	N/A	N/A	N/A	N/A	GO:0060170	ciliary membrane	N/A	N/A
Tb927.9.5860:mRNA-p1;Tb927.9.5770:mRNA-p1	Tb927.9.5860:mRNA-p1;Tb927.9.5770:mRNA-p1	Tb927.9.5860;Tb927.9.5770	tryparedoxin peroxidase;tryparedoxin peroxidase	0.02812	-0.0963758	2.07749	3.58766	2.00776	3.31717	1.19488	1.61109	1.38768	2.55577	1.7421	2.68524	2.43347	4.96908	0.275259	0.869192	0.673216	1.10308						+								+	+	+		+	N/A	N/A	GO:0016209;GO:0016491;GO:0051920	antioxidant activity;oxidoreductase activity;peroxiredoxin activity	GO:0055114	obsolete oxidation-reduction process	GO:0005634;GO:0005654;GO:0005737;GO:0005829;GO:0005929;GO:0020015	cilium;cytoplasm;cytosol;glycosome;nucleoplasm;nucleus	GO:0008379;GO:0015042	thioredoxin peroxidase activity;trypanothione-disulfide reductase activity
Tb927.11.16450:mRNA-p1	Tb927.11.16450:mRNA-p1	Tb927.11.16450	hypothetical protein, conserved	0.0427616	-0.101016	2.30306	-7.68854	2.02016	-6.15922	1.87219	-6.83739	2.31079	-7.74807	2.16436	-7.79164	2.11672	-6.82156	0.0947656	-0.232915	0.726718	-1.45356																			N/A	N/A	N/A	N/A	N/A	N/A	GO:0005730	nucleolus	N/A	N/A
Tb927.4.5320:mRNA-p1	Tb927.4.5320:mRNA-p1	Tb927.4.5320	Component of IIS longevity pathway SMK-1, putative	0.040627	-0.101748	0.128169	0.696433	0.439402	-0.999183	0.309203	-0.924813	0.825611	-1.82995	0.279027	-0.739284	0.0937941	-0.26353	0.623428	-1.08255	0.00752986	-0.0216115																			N/A	N/A	N/A	N/A	N/A	N/A	GO:0005654;GO:0005730	nucleolus;nucleoplasm	N/A	N/A
Tb927.9.3760:mRNA-p1	Tb927.9.3760:mRNA-p1	Tb927.9.3760	Nucleoporin GLE2	0.0559271	-0.102737	0.443572	-0.820223	0.256313	-0.540692	0.598684	-1.34019	1.37531	3.46603	0.285071	0.554698	2.22274	5.34347	0.677764	-0.988071	0.527894	-0.843491														+				+	N/A	N/A	GO:0005515	protein binding	GO:0006406	mRNA export from nucleus	GO:0005634;GO:0005643	nuclear pore;nucleus	GO:0003723;GO:0043130	RNA binding;ubiquitin binding
Tb927.7.190:mRNA-p1	Tb927.7.190:mRNA-p1	Tb927.7.190	thimet oligopeptidase, putative	0.0641028	-0.104056	0.772498	-1.45413	0.715129	-0.525099	0.74103	-1.32606	2.04639	-1.83353	1.98019	-2.26726	1.54424	-1.29518	0.0739866	-0.0632807	1.32448	3.36277																			N/A	N/A	GO:0004222;GO:0046872	metal ion binding;metalloendopeptidase activity	GO:0006508	proteolysis	GO:0005737;GO:0097014	ciliary plasm;cytoplasm	GO:0004222	metalloendopeptidase activity
Tb927.11.3840:mRNA-p1	Tb927.11.3840:mRNA-p1	Tb927.11.3840	hypothetical protein, conserved	0.0694912	-0.105893	1.54477	-3.02349	1.60407	-2.30652	1.39755	-3.5323	2.05867	-3.19709	2.01715	-3.53304	1.95576	-2.94879	0.543563	-0.528546	2.25869	-2.876																			N/A	N/A	N/A	N/A	N/A	N/A	GO:0005634;GO:0005730	nucleolus;nucleus	N/A	N/A
Tb927.6.1470:mRNA-p1	Tb927.6.1470:mRNA-p1	Tb927.6.1470	hypothetical protein, conserved	0.0452867	-0.109922	2.36255	-1.48525	1.8804	-0.866776	1.83658	-1.33523	3.00965	-1.83064	2.13347	-1.2915	0.618513	-0.931462	0.825623	-0.512944	0.574644	-0.724574																			N/A	N/A	N/A	N/A	N/A	N/A	GO:0005634	nucleus	N/A	N/A
Tb927.9.8740:mRNA-p1	Tb927.9.8740:mRNA-p1	Tb927.9.8740	Double RNA binding domain protein 3	0.0691663	-0.112537	0.0575362	-0.301982	0.994799	-1.12413	1.40658	-1.84539	1.44409	-1.98083	1.52428	-1.93632	0.953994	1.06772	1.23662	-1.47788	0.150799	-0.441609																			N/A	N/A	GO:0003676	nucleic acid binding	N/A	N/A	GO:0005634;GO:0005654;GO:0005737;GO:0005829;GO:0005844;GO:1990904	cytoplasm;cytosol;nucleoplasm;nucleus;polysome;ribonucleoprotein complex	GO:0003729;GO:0003730;GO:0042162	mRNA 3'-UTR binding;mRNA binding;telomeric DNA binding
Tb927.8.5880:mRNA-p1	Tb927.8.5880:mRNA-p1	Tb927.8.5880	eukaryotic translation initiation factor 1A, putative	0.125096	-0.125127	1.81196	-1.1621	0.209013	-0.258062	0.451468	-0.383374	1.12519	-1.35679	0.382216	-0.494675	0.845274	-0.792488	0.55001	-0.759042	0.025585	-0.0711308																			N/A	N/A	GO:0003723;GO:0003743	RNA binding;translation initiation factor activity	GO:0006413	translational initiation	GO:0005730;GO:0005737	cytoplasm;nucleolus	GO:0003743	translation initiation factor activity
Tb927.6.3250:mRNA-p1	Tb927.6.3250:mRNA-p1	Tb927.6.3250	C2H2 type zinc-finger (2 copies), putative	0.0889911	-0.125315	1.17362	-0.861249	0.648999	-0.734611	1.9967	-1.36276	2.11481	-2.12111	1.75992	-1.36003	2.02096	-1.48952	2.09028	-1.56393	0.119749	0.519502																			N/A	N/A	N/A	N/A	N/A	N/A	GO:0005737;GO:0031981;GO:0097014	ciliary plasm;cytoplasm;nuclear lumen	GO:0008270	zinc ion binding
Tb927.6.850:mRNA-p1;Tb11.v5.0689.1-p1	Tb927.6.850:mRNA-p1;Tb11.v5.0689.1-p1	Tb927.6.850;Tb11.v5.0689	NOT2 / NOT3 / NOT5 family, putative;ccr4-not transcription complex subunit 2	0.0657179	-0.130894	0.79647	-2.06008	0.335552	-0.903913	0.309195	-0.641378	0.581209	-1.24558	1.0497	-2.06712	0.887863	-1.41352	1.17375	-1.69246	0.156603	-0.407527																			GO:0030015	CCR4-NOT core complex	N/A	N/A	GO:0006355	regulation of transcription, DNA-templated	GO:0005737;N/A	cytoplasm;N/A	GO:0003712;GO:0005515;N/A	N/A;protein binding;transcription coregulator activity
Tb927.3.3260:mRNA-p1	Tb927.3.3260:mRNA-p1	Tb927.3.3260	hypothetical protein, conserved	0.108541	-0.131958	0.39237	1.73771	0.362441	-0.461556	0.621776	-0.70064	1.69492	-2.11107	0.450855	-0.831003	0.423018	-0.684083	1.57496	-1.38872	0.410057	-0.405809																			N/A	N/A	N/A	N/A	N/A	N/A	GO:0005643	nuclear pore	N/A	N/A
Tb927.7.3330:mRNA-p1	Tb927.7.3330:mRNA-p1	Tb927.7.3330	Flagellar attachment zone protein 10	0.208555	-0.136667	0.243532	1.00529	3.32494	3.18052	2.90975	3.13694	3.71827	4.73961	0.120028	0.544303	4.15665	5.2022	2.01884	-1.17187	0.802187	-0.641382							+	+			+	+	+	+			+	+	N/A	N/A	N/A	N/A	N/A	N/A	GO:0005929;GO:0032991;GO:0051286;GO:0120119	cell tip;cilium;flagellum attachment zone;protein-containing complex	GO:0003729;GO:0044877	mRNA binding;protein-containing complex binding
Tb927.11.10860:mRNA-p1	Tb927.11.10860:mRNA-p1	Tb927.11.10860	20S-pre-rRNA D-site endonuclease NOB1	0.139331	-0.143883	1.84041	-1.85308	0.817787	-0.783434	0.960667	-1.63462	1.32687	-1.40076	1.14262	-1.53793	0.873658	-1.19076	1.52682	-1.07828	0.0394883	-0.0729758																			N/A	N/A	GO:0004521;GO:0046872	endoribonuclease activity;metal ion binding	GO:0000469;GO:0042274	cleavage involved in rRNA processing;ribosomal small subunit biogenesis	GO:0005730;GO:0005737;GO:0030688	cytoplasm;nucleolus;preribosome, small subunit precursor	GO:0004521;GO:0005515	endoribonuclease activity;protein binding
Tb927.11.10560:mRNA-p1	Tb927.11.10560:mRNA-p1	Tb927.11.10560	eukaryotic translation initiation factor 4 gamma 4	0.0801557	-0.145496	0.260723	-0.528293	0.212971	-0.430252	0.227534	-0.455318	0.727576	-1.43041	0.793819	-1.41816	0.590467	-1.06294	1.30647	-2.29955	0.347638	1.96819																			N/A	N/A	GO:0003723;GO:0005515	protein binding;RNA binding	N/A	N/A	GO:0005737;GO:0005829;GO:0005844;GO:0010494;GO:0016281	cytoplasm;cytoplasmic stress granule;cytosol;eukaryotic translation initiation factor 4F complex;polysome	GO:0003676;GO:0003723;GO:0003729;GO:0003743	mRNA binding;nucleic acid binding;RNA binding;translation initiation factor activity
Tb927.9.6460:mRNA-p1	Tb927.9.6460:mRNA-p1	Tb927.9.6460	hypothetical protein, conserved	0.178072	-0.157811	3.4006	9.63555	3.91555	8.83671	0.498727	-0.981508	0.734546	-0.574258	3.82267	8.3069	3.20958	5.36467	0.908829	-1.12664	1.03081	-0.898549					+	+	+	+							+	+	+	+	N/A	N/A	N/A	N/A	N/A	N/A	GO:0005634;GO:0005643	nuclear pore;nucleus	N/A	N/A
Tb927.7.4420:mRNA-p1	Tb927.7.4420:mRNA-p1	Tb927.7.4420	proteasome alpha 3 subunit, putative	0.0897234	-0.166843	0.218628	-0.559369	0.0563435	-0.121959	0.304641	-0.561678	1.24362	-2.17831	0.72046	-1.47453	0.506672	-0.849275	0.447058	-0.566348	2.13279	3.15627																			GO:0005839;GO:0019773	proteasome core complex;proteasome core complex, alpha-subunit complex	N/A	N/A	GO:0006511;GO:0051603	proteolysis involved in cellular protein catabolic process;ubiquitin-dependent protein catabolic process	GO:0005634;GO:0005654;GO:0005730;GO:0005737;GO:0005839;GO:0019773	cytoplasm;nucleolus;nucleoplasm;nucleus;proteasome core complex;proteasome core complex, alpha-subunit complex	GO:0004175	endopeptidase activity
Tb927.1.1470:mRNA-p1;Tb11.v5.0315.1-p1	Tb927.1.1470:mRNA-p1;Tb11.v5.0315.1-p1	Tb927.1.1470;Tb11.v5.0315	hypothetical protein, conserved;conserved protein, unknown function	0.0697252	-0.171199	0.686655	-0.967963	0.165061	-0.273847	0.477792	-1.09108	0.665806	-1.25485	0.36032	-0.535318	0.833448	-1.18968	1.07369	-1.35534	0.435508	1.36022																			N/A	N/A	N/A	N/A	N/A	N/A	GO:0005737	cytoplasm	N/A	N/A
Tb927.7.4030:mRNA-p1	Tb927.7.4030:mRNA-p1	Tb927.7.4030	hypothetical protein, conserved	0.11652	-0.179515	0.273694	1.20069	1.9709	2.3362	1.06221	-1.37521	1.86994	-1.73999	0.395617	0.725749	0.743441	-0.723598	2.01585	-1.78606	1.25757	-1.28721																			N/A	N/A	N/A	N/A	N/A	N/A	GO:0005634;GO:0005654	nucleoplasm;nucleus	N/A	N/A
Tb927.9.13140:mRNA-p1	Tb927.9.13140:mRNA-p1	Tb927.9.13140	hypothetical protein, conserved	0.0851955	-0.1824	0.0294999	-0.135997	0.772252	-0.254717	1.97328	-1.24306	4.38003	-2.07826	3.31494	-1.48307	3.58157	-1.13841	2.37295	-1.68444	1.38209	-0.325424																			N/A	N/A	N/A	N/A	N/A	N/A	GO:0005634;GO:0005654;GO:0005737;GO:0030133	cytoplasm;nucleoplasm;nucleus;transport vesicle	N/A	N/A
Tb927.11.10070:mRNA-p1	Tb927.11.10070:mRNA-p1	Tb927.11.10070	Bromodomain factor 3, putative	0.21267	-0.188315	0.143906	0.700917	0.627925	-0.647681	0.393564	-0.59231	1.03544	-1.94197	0.869698	-1.45941	0.689866	-1.05113	1.50743	-1.32296	0.285153	-0.469247																			N/A	N/A	GO:0005515	protein binding	N/A	N/A	GO:0005634;GO:0005654	nucleoplasm;nucleus	N/A	N/A
Tb927.11.6430:mRNA-p1	Tb927.11.6430:mRNA-p1	Tb927.11.6430	hypothetical protein, conserved	0.217791	-0.191198	0.655557	-0.738007	0.315524	-0.217916	1.2	-0.945318	0.0441209	-0.0949653	1.22098	-1.65524	1.13051	0.557587	1.97035	-1.47983	0.963618	1.61817																			N/A	N/A	N/A	N/A	N/A	N/A	GO:0005737	cytoplasm	GO:0003729	mRNA binding
Tb927.4.4560:mRNA-p1	Tb927.4.4560:mRNA-p1	Tb927.4.4560	hypothetical protein, conserved	0.113695	-0.194964	0.71966	-1.12173	0.780564	-0.828169	0.685246	-1.09202	1.10851	1.22138	1.29632	1.33971	0.78037	0.784022	0.348074	-0.382014	1.92044	2.76495														+		+			N/A	N/A	N/A	N/A	N/A	N/A	GO:0005737	cytoplasm	N/A	N/A
Tb927.2.5610:mRNA-p1;Tb927.2.5530:mRNA-p1	Tb927.2.5610:mRNA-p1;Tb927.2.5530:mRNA-p1	Tb927.2.5610;Tb927.2.5530	Present in the outer mitochondrial membrane proteome 22-1;Present in the outer mitochondrial membrane proteome 22B	0.103888	-0.201385	0.237155	-0.231463	0.529381	-0.398744	1.95244	-1.21408	0.571371	-0.76254	1.69048	-1.6013	1.09475	-0.698	0.350575	0.825538	0.298169	0.758973																			N/A	N/A	N/A	N/A	N/A	N/A	GO:0005737;GO:0005739;GO:0005741	cytoplasm;mitochondrial outer membrane;mitochondrion	N/A	N/A
Tb927.10.15530:mRNA-p1;Tb11.v5.0748.1-p1	Tb927.10.15530:mRNA-p1;Tb11.v5.0748.1-p1	Tb927.10.15530;Tb11.v5.0748	ABC transporter, putative;ABC transport system ATP-binding protein, putative	0.177085	-0.201756	0.227256	0.31251	0.85052	-1.04013	0.419212	-0.682542	0.00961801	-0.0389706	1.41521	-1.85232	0.231868	-0.460758	0.277316	0.369588	1.19473	3.28491																			N/A	N/A	GO:0005524;GO:0016887	ATP binding;ATP hydrolysis activity	N/A	N/A	GO:0005737;GO:0009898;GO:0016021;GO:0097014;N/A	ciliary plasm;cytoplasm;cytoplasmic side of plasma membrane;integral component of membrane;N/A	GO:0005524;GO:0042624;N/A	ATP binding;N/A;obsolete ATPase activity, uncoupled
Tb927.10.12240:mRNA-p1	Tb927.10.12240:mRNA-p1	Tb927.10.12240	3-ketoacyl-CoA reductase, putative	0.112466	-0.205366	0.46332	-0.931648	0.475772	-0.906786	0.349868	-0.929116	1.08669	-2.11528	2.36589	6.3058	1.39446	-2.93945	0.764712	-1.0449	0.396501	-0.656284															+	+			GO:0016021	integral component of membrane	N/A	N/A	GO:0055114	obsolete oxidation-reduction process	GO:0005635;GO:0005737;GO:0005783	cytoplasm;endoplasmic reticulum;nuclear envelope	GO:0016491	oxidoreductase activity
Tb927.9.4390:mRNA-p1	Tb927.9.4390:mRNA-p1	Tb927.9.4390	DNA-damage inducible protein DDI1-like protein	0.0601415	-0.208299	0.114548	-0.401547	0.645672	-0.752923	0.785756	-1.10214	1.10035	-1.97592	2.27539	-2.84537	1.68193	-1.64673	1.69178	-1.75813	0.409117	-0.987775																			N/A	N/A	GO:0004190;GO:0005515	aspartic-type endopeptidase activity;protein binding	GO:0006508	proteolysis	GO:0005654	nucleoplasm	N/A	N/A
Tb927.11.14950:mRNA-p1	Tb927.11.14950:mRNA-p1	Tb927.11.14950	zinc finger protein 2	0.0747651	-0.215277	0.863681	-1.86627	0.92348	-1.3254	1.35141	-1.85368	1.74556	-2.65168	0.679143	-1.43778	0.976092	-1.36855	1.46549	-1.65687	0.189677	-0.692054																			N/A	N/A	GO:0005515;GO:0046872	metal ion binding;protein binding	N/A	N/A	GO:0005737	cytoplasm	GO:0003676;GO:0003723;GO:0003729	mRNA binding;nucleic acid binding;RNA binding
Tb927.11.11010:mRNA-p1	Tb927.11.11010:mRNA-p1	Tb927.11.11010	hypothetical protein, conserved	0.167596	-0.22731	0.0747063	-0.168797	0.38283	-0.41676	0.99609	-0.93103	0.172034	0.502862	1.04504	-1.00636	0.377831	-0.433496	1.1241	-0.943136	1.2093	-1.49852																			N/A	N/A	N/A	N/A	N/A	N/A	GO:0005737;GO:0005930;GO:0030990;GO:0097014	axoneme;ciliary plasm;cytoplasm;intraciliary transport particle	GO:0042301	phosphate ion binding
Tb927.7.1890:mRNA-p1	Tb927.7.1890:mRNA-p1	Tb927.7.1890	hypothetical protein, conserved	0.159068	-0.227946	0.250607	0.847463	0.432361	0.741776	0.215057	-0.399719	0.295317	-0.686326	0.0247521	-0.0803544	0.529015	-0.893997	0.159638	0.416319	0.73319	-0.88504																			N/A	N/A	N/A	N/A	N/A	N/A	GO:0005634;GO:0005654	nucleoplasm;nucleus	N/A	N/A
Tb927.3.5530:mRNA-p1	Tb927.3.5530:mRNA-p1	Tb927.3.5530	Tb-292 membrane associated protein	0.0814931	-0.247988	1.22208	-1.09588	0.240694	0.246479	0.732946	-0.693113	0.372477	1.55204	1.38855	-1.29367	0.0188354	-0.0602763	0.0430168	-0.191764	2.48169	6.76694		+																	GO:0016021	integral component of membrane	N/A	N/A	N/A	N/A	GO:0005640;GO:0005737;GO:0020018;GO:0030139	ciliary pocket membrane;cytoplasm;endocytic vesicle;nuclear outer membrane	N/A	N/A
Tb927.10.6220:mRNA-p1	Tb927.10.6220:mRNA-p1	Tb927.10.6220	5'-3' exoribonuclease D	0.128608	-0.252711	0.998604	-1.70947	1.07212	-1.64145	0.456803	-1.39192	1.42697	-2.33191	1.36199	-2.21735	0.546579	-1.06607	0.678619	0.806224	1.48931	-1.61065																			N/A	N/A	GO:0003676;GO:0004527	exonuclease activity;nucleic acid binding	N/A	N/A	GO:0005634;GO:0005730	nucleolus;nucleus	GO:0003723;GO:0004527;GO:0004534;GO:0042162	5'-3' exoribonuclease activity;exonuclease activity;RNA binding;telomeric DNA binding
Tb927.8.3710:mRNA-p1	Tb927.8.3710:mRNA-p1	Tb927.8.3710	3'-5' exonuclease	0.374198	-0.260417	0.0569618	-0.193621	0.86127	-0.869674	1.38027	-1.08795	0.495825	-0.409421	0.555039	-0.884711	1.04641	-0.896038	0.61518	-0.585182	0.407894	-0.496092																			N/A	N/A	GO:0003676	nucleic acid binding	N/A	N/A	GO:0005622;GO:0005634;GO:0005654	intracellular anatomical structure;nucleoplasm;nucleus	GO:0004527;GO:0008408	3'-5' exonuclease activity;exonuclease activity
Tb927.9.12170:mRNA-p1	Tb927.9.12170:mRNA-p1	Tb927.9.12170	leucine-rich repeat protein (LRRP), putative	0.162942	-0.261576	0.971824	-1.70585	0.348121	-0.900864	0.267176	-0.630939	1.00127	-1.92973	1.02769	-1.83595	1.3296	2.50717	0.524274	-1.02672	0.155385	-0.330573																			N/A	N/A	GO:0005515	protein binding	N/A	N/A	GO:0036064;GO:0051286;GO:0120280	cell tip;ciliary basal body;ciliary pro-basal body	N/A	N/A
Tb927.1.4420:mRNA-p1	Tb927.1.4420:mRNA-p1	Tb927.1.4420	ABC transporter, putative	0.128124	-0.262222	0.415694	1.38142	0.69123	-0.312715	2.53781	-1.82665	1.70177	-1.80543	0.972516	-1.36104	0.236006	-0.261131	1.06604	-1.02643	0.157703	-0.250873																			GO:0016021	integral component of membrane	GO:0005524	ATP binding	N/A	N/A	GO:0005741;GO:0005783;GO:0043190;GO:0120119	ATP-binding cassette (ABC) transporter complex;endoplasmic reticulum;flagellum attachment zone;mitochondrial outer membrane	GO:0042626	ATPase-coupled transmembrane transporter activity
Tb927.10.14870:mRNA-p1	Tb927.10.14870:mRNA-p1	Tb927.10.14870	hypothetical protein, conserved	0.136949	-0.278011	1.27351	-3.09027	1.29303	-2.88036	1.38945	-3.43775	1.25855	-3.79145	1.68335	-4.23961	1.4533	-3.48346	0.0986236	-0.239798	2.18844	-3.8924																			N/A	N/A	N/A	N/A	N/A	N/A	GO:0005634;GO:0005737;GO:0031981;GO:0097014	ciliary plasm;cytoplasm;nuclear lumen;nucleus	N/A	N/A
Tb927.10.15760:mRNA-p1	Tb927.10.15760:mRNA-p1	Tb927.10.15760	hypothetical protein, conserved	0.312318	-0.280343	0.468875	-0.844251	0.566132	-0.685594	1.14845	-1.28877	0.285697	-0.59626	1.53722	-2.18977	0.462098	-0.517124	1.37077	-1.39825	1.08624	-1.26905																			N/A	N/A	N/A	N/A	N/A	N/A	GO:0030863	cortical cytoskeleton	N/A	N/A
Tb927.9.4680:mRNA-p1	Tb927.9.4680:mRNA-p1	Tb927.9.4680	Eukaryotic initiation factor 4A-1	0.161952	-0.282974	0.199652	0.923621	0.0539503	-0.118646	0.143063	0.302454	1.49999	3.15309	0.579845	-1.0736	1.85813	4.17587	0.899615	-1.1095	0.749121	1.49869													+	+				+	N/A	N/A	GO:0003676;GO:0004386;GO:0005524	ATP binding;helicase activity;nucleic acid binding	N/A	N/A	GO:0005730;GO:0005737;GO:0005829;GO:0005844;GO:0010494;GO:0016281	cytoplasm;cytoplasmic stress granule;cytosol;eukaryotic translation initiation factor 4F complex;nucleolus;polysome	GO:0003676;GO:0003724;GO:0003729;GO:0003743;GO:0004386;GO:0005524;GO:0008186	ATP binding;ATP-dependent activity, acting on RNA;helicase activity;mRNA binding;nucleic acid binding;RNA helicase activity;translation initiation factor activity
Tb927.3.1570:mRNA-p1	Tb927.3.1570:mRNA-p1	Tb927.3.1570	Lapatinib-binding protein kinase 3	0.105107	-0.29213	0.161008	0.673092	0.899971	1.76886	0.376223	-0.779066	0.882194	-1.91951	0.148496	-0.452725	0.11092	-0.286388	0.384385	-0.638109	0.159967	0.346013																			N/A	N/A	GO:0004672;GO:0005524	ATP binding;protein kinase activity	GO:0006468	protein phosphorylation	GO:0005654;GO:0005737	cytoplasm;nucleoplasm	GO:0004674;GO:0005524	ATP binding;protein serine/threonine kinase activity
Tb927.9.8880:mRNA-p1;Tb927.9.8850:mRNA-p1	Tb927.9.8880:mRNA-p1;Tb927.9.8850:mRNA-p1	Tb927.9.8880;Tb927.9.8850	actin A;actin B	0.223342	-0.292248	1.00752	-1.20159	0.183293	-0.210169	0.32477	-0.416279	0.204829	0.455819	1.15842	-1.60682	0.22178	0.808799	0.817046	-1.14282	0.528378	-0.446412																			N/A	N/A	N/A	N/A	N/A	N/A	GO:0005737;GO:0015629;GO:0097014	actin cytoskeleton;ciliary plasm;cytoplasm	GO:0005200	structural constituent of cytoskeleton
Tb927.11.9590:mRNA-p1	Tb927.11.9590:mRNA-p1	Tb927.11.9590	S-adenosylhomocysteine hydrolase, putative	0.155479	-0.293528	0.164939	0.539506	0.412646	-0.876088	0.345787	-0.862385	0.898774	-1.82559	0.433961	-0.925687	0.19909	-0.460032	1.192	-1.72174	0.305373	-0.529249																			N/A	N/A	GO:0000166;GO:0004013	adenosylhomocysteinase activity;nucleotide binding	GO:0006730	one-carbon metabolic process	GO:0005654;GO:0005737;GO:0005829;GO:0097014	ciliary plasm;cytoplasm;cytosol;nucleoplasm	GO:0004013	adenosylhomocysteinase activity
Tb927.9.13380:mRNA-p1	Tb927.9.13380:mRNA-p1	Tb927.9.13380	Autophagy-related protein 24	0.107252	-0.297365	0.50781	-1.18106	0.109847	-0.249818	0.884838	-1.75526	0.49924	1.14071	0.130151	-0.275983	0.269745	-0.49816	0.139569	-0.273297	0.808793	3.41559																			N/A	N/A	GO:0035091	phosphatidylinositol binding	N/A	N/A	GO:0005737;GO:0005768;GO:0030133;GO:0030666	cytoplasm;endocytic vesicle membrane;endosome;transport vesicle	GO:0035091	phosphatidylinositol binding
Tb927.5.4380:mRNA-p1;Tb05.5K5.30:mRNA-p1	Tb927.5.4380:mRNA-p1;Tb05.5K5.30:mRNA-p1	Tb927.5.4380;Tb05.5K5.30	serine/threonine protein phosphatase, putative;Kinetoplastid-specific Protein Phosphatase 1	0.151442	-0.297527	0.235807	-0.562143	0.60902	-0.694681	3.18767	7.01386	2.86436	6.70669	2.92154	5.67705	1.94987	2.7585	4.1291	6.25718	0.414145	1.82351									+	+	+	+	+	+	+	+		+	N/A	N/A	GO:0003677;GO:0016787;GO:0106306;GO:0106307	DNA binding;hydrolase activity;protein serine phosphatase activity;protein threonine phosphatase activity	N/A	N/A	GO:0005634;GO:0005737;GO:0005829;GO:0005856;GO:0005929;GO:0031981;GO:0036064;GO:0097014;GO:0097542;GO:0120118;GO:0120119	ciliary basal body;ciliary plasm;ciliary tip;cilium;cytoplasm;cytoskeleton;cytosol;flagella connector;flagellum attachment zone;nuclear lumen;nucleus	GO:0004722;GO:0016787;GO:0016791	hydrolase activity;phosphatase activity;protein serine/threonine phosphatase activity
Tb927.4.3360:mRNA-p1	Tb927.4.3360:mRNA-p1	Tb927.4.3360	hypothetical protein, conserved	0.35788	-0.31079	0.104326	-0.281397	0.249989	-0.444947	0.337535	-0.451815	1.51188	-2.4185	2.00079	-2.17657	1.65441	-1.6239	1.00905	-1.0932	0.140182	-0.108861																			N/A	N/A	N/A	N/A	N/A	N/A	GO:0005654	nucleoplasm	N/A	N/A
Tb927.10.9890:mRNA-p1;Tb11.v5.0458.1-p1	Tb927.10.9890:mRNA-p1	Tb927.10.9890	hypothetical protein, conserved	0.180538	-0.314041	1.2202	-1.4921	0.0502378	-0.136408	0.0363052	0.0557114	0.599021	-0.751189	1.25927	-1.56028	0.0684811	0.142462	0.916988	-1.0001	0.149645	-0.168214																			N/A	N/A	N/A	N/A	N/A	N/A	GO:0005737;GO:0020015	cytoplasm;glycosome	N/A	N/A
Tb927.6.3800:mRNA-p1;Tb927.6.3750:mRNA-p1;Tb927.6.3740:mRNA-p1	Tb927.6.3800:mRNA-p1;Tb927.6.3750:mRNA-p1;Tb927.6.3740:mRNA-p1	Tb927.6.3800;Tb927.6.3750;Tb927.6.3740	heat shock 70 kDa protein, mitochondrial precursor, putative;heat shock 70 kDa protein, mitochondrial precursor, putative;heat shock 70 kDa protein, mitochondrial precursor, putative	0.475592	-0.319061	0.310001	1.14998	0.0911531	-0.217004	0.384659	-0.424228	2.48484	4.51866	0.491705	-0.44691	3.17613	5.59565	0.808851	-1.19822	0.125365	-0.197917													+	+			+	+	N/A	N/A	GO:0005524;GO:0051082	ATP binding;unfolded protein binding	GO:0006457	protein folding	GO:0005737;GO:0005739	cytoplasm;mitochondrion	GO:0005524;GO:0016887;GO:0031072;GO:0044183;GO:0051082;GO:0051787	ATP binding;ATP hydrolysis activity;heat shock protein binding;misfolded protein binding;protein folding chaperone;unfolded protein binding
Tb927.7.5230:mRNA-p1	Tb927.7.5230:mRNA-p1	Tb927.7.5230	lanosterol synthase	0.370629	-0.320318	1.12503	-1.2519	0.814659	-0.683383	0.376128	-0.834064	0.145865	-0.357549	1.29511	-1.79747	0.26038	0.608027	0.817191	-0.741428	1.39436	-1.20273																			GO:0005811;GO:0016021	integral component of membrane;lipid droplet	GO:0000250;GO:0003824;GO:0004659;GO:0016866;GO:0042300	beta-amyrin synthase activity;catalytic activity;intramolecular transferase activity;lanosterol synthase activity;prenyltransferase activity	GO:0016104	triterpenoid biosynthetic process	GO:0005635;GO:0005737;GO:0005811;GO:0016021	cytoplasm;integral component of membrane;lipid droplet;nuclear envelope	GO:0000250	lanosterol synthase activity
Tb927.4.1800:mRNA-p1;Tb927.4.1790:mRNA-p1	Tb927.4.1800:mRNA-p1;Tb927.4.1790:mRNA-p1	Tb927.4.1800;Tb927.4.1790	ribosomal protein L3, putative;Mitochondrial ribosomal protein L3	0.0809541	-0.335574	0.0471754	0.299128	0.0556741	0.309129	0.0879432	-0.473255	0.00900198	0.0551335	0.156408	0.802402	0.212044	1.05283	0.17532	-0.67523	0.302679	-1.09719																			GO:0005840	ribosome	GO:0003735	structural constituent of ribosome	GO:0006412	translation	GO:0005762;GO:0022625	cytosolic large ribosomal subunit;mitochondrial large ribosomal subunit	GO:0003723;GO:0003735	RNA binding;structural constituent of ribosome
Tb927.10.8430:mRNA-p1	Tb927.10.8430:mRNA-p1	Tb927.10.8430	40S ribosomal protein S12, putative	0.133234	-0.337709	0.0890675	0.19239	0.60812	-0.563445	0.880161	-0.807207	0.166571	0.412142	0.313936	-0.7692	0.115378	-0.134614	0.910011	0.643712	0.000297642	0.0012207																			GO:0005840	ribosome	GO:0003735	structural constituent of ribosome	GO:0006412	translation	GO:0005622;GO:0005654;GO:0005730;GO:0005737;GO:0005840;GO:0022627;GO:0097014	ciliary plasm;cytoplasm;cytosolic small ribosomal subunit;intracellular anatomical structure;nucleolus;nucleoplasm;ribosome	GO:0003735	structural constituent of ribosome
Tb927.9.2470:mRNA-p1;Tb927.9.2490:mRNA-p1	Tb927.9.2470:mRNA-p1;Tb927.9.2490:mRNA-p1	Tb927.9.2470;Tb927.9.2490	nucleolar protein;nucleolar protein	0.232174	-0.339661	0.909796	-1.23967	0.266275	-0.357649	0.482512	-0.587336	1.55414	-1.91438	1.49255	-2.05415	0.0460832	-0.0780198	1.44755	-1.37432	0.417201	0.973756																			N/A	N/A	N/A	N/A	N/A	N/A	GO:0005730;GO:0005737	cytoplasm;nucleolus	N/A	N/A
Tb927.10.10010:mRNA-p1	Tb927.10.10010:mRNA-p1	Tb927.10.10010	mRNA turnover protein 4 homolog, putative	0.283283	-0.350203	0.323392	-0.725055	1.15576	-1.04613	1.12438	-1.21452	1.94395	-1.85308	2.01606	-1.90416	0.729445	-0.585364	1.57644	-1.01913	0.797057	-0.690743																			GO:0005737	cytoplasm	N/A	N/A	GO:0000027;GO:0042254	ribosomal large subunit assembly;ribosome biogenesis	GO:0005634;GO:0005730;GO:0005840;GO:0030687	nucleolus;nucleus;preribosome, large subunit precursor;ribosome	GO:0003735	structural constituent of ribosome
Tb927.6.1190:mRNA-p1	Tb927.6.1190:mRNA-p1	Tb927.6.1190	Plus-3 domain/Zinc finger, C3HC4 type (RING finger), putative	0.19837	-0.358248	0.816332	-1.44827	0.118015	-0.337056	0.507436	-1.5489	1.06648	1.95147	0.907671	-1.60846	0.271406	-0.585969	0.700095	-0.959465	0.260447	-0.383215														+					N/A	N/A	GO:0003677	DNA binding	N/A	N/A	GO:0030133;GO:0036064;GO:0051286;GO:0120280	cell tip;ciliary basal body;ciliary pro-basal body;transport vesicle	N/A	N/A
Tb927.10.6950:mRNA-p1;Tb927.10.6910:mRNA-p1;Tb11.v5.0496.1-p1;Tb10.v4.0247:mRNA-p1	Tb927.10.6950:mRNA-p1;Tb927.10.6910:mRNA-p1;Tb11.v5.0496.1-p1;Tb10.v4.0247:mRNA-p1	Tb927.10.6950;Tb927.10.6910;Tb11.v5.0496;Tb10.v4.0247	s-adenosyl-L-methionine-c-24-delta-sterol-methyl transferase a, putative;sterol 24-c-methyltransferase, putative;Sterol methyltransferase, putative;sterol 24-c-methyltransferase, putative	0.289857	-0.359469	0.689283	-0.955165	0.27138	-0.452122	0.230545	-0.544295	0.209889	-0.54841	2.04953	3.6208	1.13647	-1.60358	1.13168	-1.17515	0.329565	-0.543322															+	+			N/A	N/A	GO:0008168	methyltransferase activity	GO:0006694;GO:0032259	methylation;steroid biosynthetic process	GO:0005737;GO:0005783	cytoplasm;endoplasmic reticulum	GO:0003838	sterol 24-C-methyltransferase activity
Tb927.8.6000:mRNA-p1	Tb927.8.6000:mRNA-p1	Tb927.8.6000	fatty acid desaturase, putative	0.152383	-0.359981	0.6512	-1.79021	0.522939	-1.00038	0.114787	-0.263292	0.454645	-0.929563	1.54614	3.25473	0.473499	-0.9894	0.770924	-1.05023	0.318477	-0.531573															+	+			GO:0016021	integral component of membrane	GO:0004768;GO:0016717	oxidoreductase activity, acting on paired donors, with oxidation of a pair of donors resulting in the reduction of molecular oxygen to two molecules of water;stearoyl-CoA 9-desaturase activity	GO:0006629;GO:0006636;GO:0055114	lipid metabolic process;obsolete oxidation-reduction process;unsaturated fatty acid biosynthetic process	GO:0005635;GO:0005783;GO:0005789;GO:0016021	endoplasmic reticulum;endoplasmic reticulum membrane;integral component of membrane;nuclear envelope	GO:0004768;GO:0005506;GO:0016491	iron ion binding;oxidoreductase activity;stearoyl-CoA 9-desaturase activity
Tb927.11.1900:mRNA-p1	Tb927.11.1900:mRNA-p1	Tb927.11.1900	T-complex protein 1, beta subunit, putative	0.157188	-0.360103	1.15238	-1.12082	0.519735	-0.626631	0.140743	-0.309081	0.331508	0.666781	0.469004	0.50272	0.379965	0.476686	0.250987	-0.568427	3.09774	3.66887	+	+																	GO:0005829;GO:0005832	chaperonin-containing T-complex;cytosol	GO:0005524;GO:0051082	ATP binding;unfolded protein binding	GO:0006457	protein folding	GO:0005737;GO:0005832;GO:0031981;GO:0097014	chaperonin-containing T-complex;ciliary plasm;cytoplasm;nuclear lumen	GO:0051082	unfolded protein binding
Tb927.6.4140:mRNA-p1	Tb927.6.4140:mRNA-p1	Tb927.6.4140	paraflagellar rod component, putative	0.471982	-0.361286	0.201735	0.924701	0.646986	-0.956255	0.1611	0.330055	0.325771	1.56158	0.237182	0.551347	0.894141	-0.998706	1.03093	-1.18476	1.24367	-0.848883																			N/A	N/A	N/A	N/A	N/A	N/A	GO:0097740	paraflagellar rod	N/A	N/A
Tb927.11.14460:mRNA-p1	Tb927.11.14460:mRNA-p1	Tb927.11.14460	ADP-ribosylation factor GTPase activating protein 1, putative	0.200897	-0.371264	0.913308	-1.73137	0.432755	-0.771174	0.290922	-0.818252	0.604821	-1.02845	0.96985	1.64757	0.603254	-1.00772	1.14186	-1.48825	0.320414	-0.555871																+			GO:0000139	Golgi membrane	GO:0005096	GTPase activator activity	N/A	N/A	GO:0005634;GO:0005737;GO:0005739;GO:0005794;GO:0030133	cytoplasm;Golgi apparatus;mitochondrion;nucleus;transport vesicle	GO:0003677	DNA binding
Tb927.4.200:mRNA-p1	Tb927.4.200:mRNA-p1	Tb927.4.200	retrotransposon hot spot protein 1 (RHS1), putative	0.241676	-0.371569	0.434753	1.71729	0.498503	1.53607	0.481737	-1.02404	0.737553	-0.998256	0.556896	-1.00636	0.0354272	-0.0635754	2.40673	2.53279	0.369691	0.949481										+									N/A	N/A	N/A	N/A	N/A	N/A	GO:0005654	nucleoplasm	N/A	N/A
Tb927.10.15170:mRNA-p1	Tb927.10.15170:mRNA-p1	Tb927.10.15170	hypothetical protein, conserved	0.269866	-0.373543	1.13054	-1.02611	0.314222	-0.370108	0.299887	-0.681156	0.196692	-0.402472	1.12437	-1.63952	1.15955	-1.29085	0.132439	0.330907	1.08898	-0.840665																			N/A	N/A	N/A	N/A	N/A	N/A	GO:0005634;GO:0005730;GO:0005737;GO:0031981;GO:0097014	ciliary plasm;cytoplasm;nuclear lumen;nucleolus;nucleus	GO:0003729	mRNA binding
Tb927.10.5380:mRNA-p1;Tb11.v5.0337.1-p1	Tb927.10.5380:mRNA-p1;Tb11.v5.0337.1-p1	Tb927.10.5380;Tb11.v5.0337	hypothetical protein, conserved;intraflagellar transport protein 122	0.322702	-0.376986	0.730023	-1.30189	0.235154	-0.425547	0.280659	-0.435228	0.912188	1.0426	0.503011	-1.30447	0.486643	-0.572688	0.951643	-1.09258	0.78281	1.39143														+					N/A	N/A	GO:0005515	protein binding	GO:0060271	cilium assembly	GO:0030990;GO:0030991;GO:0036064;GO:0097730;N/A	ciliary basal body;intraciliary transport particle;intraciliary transport particle A;N/A;non-motile cilium	N/A	N/A
Tb927.9.5900:mRNA-p1	Tb927.9.5900:mRNA-p1	Tb927.9.5900	glutamate dehydrogenase	0.352215	-0.380892	0.65911	-0.69477	1.28806	-1.42801	1.44059	-1.68619	1.57779	3.02907	0.760419	-0.81267	2.221	4.09862	1.52301	-1.47036	0.522752	-0.730874													+	+				+	N/A	N/A	GO:0004352;GO:0016491	glutamate dehydrogenase (NAD+) activity;oxidoreductase activity	GO:0006520;GO:0019551;GO:0055114	cellular amino acid metabolic process;glutamate catabolic process to 2-oxoglutarate;obsolete oxidation-reduction process	GO:0005737;GO:0005739;GO:0020023	cytoplasm;kinetoplast;mitochondrion	GO:0004352;GO:0016491	glutamate dehydrogenase (NAD+) activity;oxidoreductase activity
Tb927.10.6030:mRNA-p1;Tb11.v5.0196.1-p1	Tb927.10.6030:mRNA-p1;Tb11.v5.0196.1-p1	Tb927.10.6030;Tb11.v5.0196	Proteasome subunit A N-terminal signature/Proteasome subunit, putative;proteasome subunit alpha type-1, putative	0.203798	-0.381533	0.337908	-0.858464	0.400771	-0.917281	0.48039	-1.08879	1.14335	-2.51582	0.470305	-1.83913	0.36282	-0.954542	0.570028	-1.16029	0.377116	-0.764218																			GO:0005839;GO:0019773	proteasome core complex;proteasome core complex, alpha-subunit complex	N/A	N/A	GO:0006511;GO:0051603	proteolysis involved in cellular protein catabolic process;ubiquitin-dependent protein catabolic process	GO:0005634;GO:0005654;GO:0005737;GO:0005739;GO:0005839;GO:0019773;GO:0070565;N/A	cytoplasm;mitochondrion;N/A;nucleoplasm;nucleus;proteasome core complex;proteasome core complex, alpha-subunit complex;telomere-telomerase complex	GO:0004175;N/A	endopeptidase activity;N/A
Tb927.10.3970:mRNA-p1	Tb927.10.3970:mRNA-p1	Tb927.10.3970	hypothetical protein, conserved	0.245439	-0.383132	2.1124	-2.39238	1.19233	-1.10893	0.560495	-0.647161	1.46803	-1.21463	2.09797	-3.0749	0.550171	-1.03417	2.30623	-1.48167	0.416737	-0.59042																			N/A	N/A	N/A	N/A	N/A	N/A	GO:0005654	nucleoplasm	N/A	N/A
Tb927.8.7100:mRNA-p1	Tb927.8.7100:mRNA-p1	Tb927.8.7100	acetyl-CoA carboxylase	0.415946	-0.385042	1.75523	-2.06883	1.97504	-2.38965	1.76828	-2.03686	1.96969	-2.51963	2.5436	-4.51753	2.79201	-4.59249	0.43589	0.424098	1.07676	-3.36856																			N/A	N/A	GO:0003989;GO:0005524;GO:0016874;GO:0046872	acetyl-CoA carboxylase activity;ATP binding;ligase activity;metal ion binding	GO:0006633;GO:2001295	fatty acid biosynthetic process;malonyl-CoA biosynthetic process	GO:0005737;GO:0005739;GO:0009343;GO:0020015	biotin carboxylase complex;cytoplasm;glycosome;mitochondrion	GO:0003989;GO:0004075;GO:0005524	acetyl-CoA carboxylase activity;ATP binding;biotin carboxylase activity
Tb927.3.3360:mRNA-p1	Tb927.3.3360:mRNA-p1	Tb927.3.3360	acyltransferase, putative	0.383598	-0.387722	1.39243	-1.88936	0.272081	-0.48256	0.781678	-0.883034	1.36622	-1.67282	1.6158	1.96837	1.04998	-1.25776	1.35003	-1.0894	1.0886	-1.03887															+	+			GO:0016021	integral component of membrane	GO:0016746	acyltransferase activity	N/A	N/A	GO:0030133	transport vesicle	N/A	N/A
Tb927.7.5020:mRNA-p1;Tb927.7.5000:mRNA-p1;Tb11.v5.0182.1-p1;Tb11.v5.0181.1-p1	Tb927.7.5020:mRNA-p1;Tb927.7.5000:mRNA-p1;Tb11.v5.0182.1-p1;Tb11.v5.0181.1-p1	Tb927.7.5020;Tb927.7.5000;Tb11.v5.0182;Tb11.v5.0181	60S ribosomal protein L19, putative;60S ribosomal protein L19, putative;60S ribosomal protein L19, putative;60S ribosomal protein L19, putative	0.236768	-0.388965	1.14768	-3.8327	2.04005	-4.95623	1.90912	-6.18413	1.02378	-3.84103	2.11107	-5.32838	0.994314	-3.73622	0.00256938	0.00530815	0.982467	-1.35197																			GO:0005840;GO:0022625	cytosolic large ribosomal subunit;ribosome	GO:0003723;GO:0003735	RNA binding;structural constituent of ribosome	GO:0006412	translation	GO:0005730;GO:0005737;GO:0022625	cytoplasm;cytosolic large ribosomal subunit;nucleolus	GO:0003723;GO:0003735	RNA binding;structural constituent of ribosome
Tb927.10.4940:mRNA-p1;Tb11.v5.0596.1-p1	Tb927.10.4940:mRNA-p1;Tb11.v5.0596.1-p1	Tb927.10.4940;Tb11.v5.0596	serine/threonine protein kinase, putative;Nuclear Dbf2-related kinase	0.406465	-0.390961	0.96006	-1.28691	0.782912	-0.952062	0.247338	-0.819764	0.615435	-1.20496	1.19815	-1.68292	0.95018	-1.27119	1.38994	-1.12372	0.431758	1.71542																			N/A	N/A	GO:0004672;GO:0005524	ATP binding;protein kinase activity	GO:0006468	protein phosphorylation	GO:0005737;GO:0005829;GO:0020023;N/A	cytoplasm;cytosol;kinetoplast;N/A	GO:0004672;GO:0005524;N/A	ATP binding;N/A;protein kinase activity
Tb927.4.1850:mRNA-p1	Tb927.4.1850:mRNA-p1	Tb927.4.1850	hypothetical protein, conserved	0.214625	-0.391517	0.850574	-1.68646	0.361558	-0.720963	0.167203	-0.576815	0.625767	-1.49342	0.720209	-1.35846	0.110331	-0.250281	1.0538	-1.40021	0.754693	2.40642																			GO:0005786	signal recognition particle, endoplasmic reticulum targeting	GO:0003723;GO:0005047;GO:0008312;GO:0030942	7S RNA binding;endoplasmic reticulum signal peptide binding;RNA binding;signal recognition particle binding	GO:0006614	SRP-dependent cotranslational protein targeting to membrane	GO:0005786	signal recognition particle, endoplasmic reticulum targeting	GO:0005047	signal recognition particle binding
Tb927.11.2950:mRNA-p1	Tb927.11.2950:mRNA-p1	Tb927.11.2950	Nucleoporin NUP89	0.302955	-0.396793	1.03241	-1.35652	0.593282	-1.38139	3.15926	7.8535	2.43667	4.20082	3.09651	6.7989	2.83058	5.42947	0.5352	-0.675151	0.00128257	0.00147311											+	+	+	+	+	+	+	+	GO:0005643;GO:0031965	nuclear membrane;nuclear pore	GO:0017056	structural constituent of nuclear pore	N/A	N/A	GO:0005634;GO:0005643;GO:0031080	nuclear pore;nuclear pore outer ring;nucleus	GO:0017056	structural constituent of nuclear pore
Tb927.1.3410.1:mRNA-p1;Tb927.1.3410.2:mRNA-p1	Tb927.1.3410.1:mRNA-p1;Tb927.1.3410.2:mRNA-p1	Tb927.1.3410	hypothetical protein, conserved;hypothetical protein, conserved	0.153435	-0.396905	0.488875	-1.29514	0.37749	-1.05227	0.293278	-0.97801	0.518222	-1.48524	0.88413	-2.36098	0.244705	-0.785217	0.488211	-1.37913	0.601377	-1.2349																			GO:0016021;N/A	integral component of membrane;N/A	N/A	N/A	N/A	N/A	GO:0005634;GO:0005730	nucleolus;nucleus	N/A	N/A
Tb927.10.15410:mRNA-p1	Tb927.10.15410:mRNA-p1	Tb927.10.15410	glycosomal malate dehydrogenase	0.553541	-0.401409	0.172931	0.598092	0.12364	-0.21091	1.33396	-1.17652	0.929632	1.46689	0.483309	-0.516581	1.99203	2.54036	0.770032	-0.572637	0.283449	-0.533258														+				+	N/A	N/A	GO:0003824;GO:0016491;GO:0016616;GO:0030060	catalytic activity;L-malate dehydrogenase activity;oxidoreductase activity;oxidoreductase activity, acting on the CH-OH group of donors, NAD or NADP as acceptor	GO:0005975;GO:0006099;GO:0019752;GO:0055114	carbohydrate metabolic process;carboxylic acid metabolic process;obsolete oxidation-reduction process;tricarboxylic acid cycle	GO:0005737;GO:0020015;GO:0097014	ciliary plasm;cytoplasm;glycosome	GO:0005515;GO:0016491;GO:0016615;GO:0030060	L-malate dehydrogenase activity;malate dehydrogenase activity;oxidoreductase activity;protein binding
Tb927.8.6840:mRNA-p1	Tb927.8.6840:mRNA-p1	Tb927.8.6840	mismatch repair protein MLH1	0.139196	-0.402505	0.938757	2.18203	0.185317	0.57633	0.179558	-0.393929	1.09324	-1.91806	0.619826	1.07693	0.316991	-0.598343	0.886684	-1.65849	0.420033	-0.577171																			GO:0032300	mismatch repair complex	GO:0005524;GO:0016887;GO:0030983	ATP binding;ATP hydrolysis activity;mismatched DNA binding	GO:0006298	mismatch repair	GO:0005634;GO:0005654;GO:0005712;GO:0005737;GO:0032300;GO:0032389	chiasma;cytoplasm;mismatch repair complex;MutLalpha complex;nucleoplasm;nucleus	GO:0016887	ATP hydrolysis activity
Tb927.9.14240:mRNA-p1;Tb11.v5.0621.1-p1	Tb927.9.14240:mRNA-p1;Tb11.v5.0621.1-p1	Tb927.9.14240;Tb11.v5.0621	hypothetical protein, conserved;Nucleoporin NUP82	0.335737	-0.405776	1.13052	-2.5478	0.0146988	0.0225248	2.54488	4.16582	3.25726	8.02996	2.38619	3.67214	1.47169	1.90855	1.15538	-1.54315	0.834955	-1.21421												+	+	+	+	+			N/A	N/A	N/A	N/A	N/A	N/A	GO:0005634;GO:0005643;GO:0031080;N/A	N/A;nuclear pore;nuclear pore outer ring;nucleus	N/A	N/A
Tb927.9.10100:mRNA-p1	Tb927.9.10100:mRNA-p1	Tb927.9.10100	SET domain protein 28	0.43321	-0.406246	0.118985	-0.131468	0.794345	0.724842	0.849494	-0.781565	0.553635	1.71011	0.937781	-1.52021	1.9957	3.03918	0.580525	-0.701335	0.730696	-0.702429																		+	N/A	N/A	GO:0005515;GO:0008168	methyltransferase activity;protein binding	GO:0032259	methylation	GO:0005737	cytoplasm	N/A	N/A
Tb927.8.3750:mRNA-p1	Tb927.8.3750:mRNA-p1	Tb927.8.3750	nucleolar protein 56	0.174979	-0.40678	1.17492	3.67474	1.14261	2.90722	0.697383	-2.24746	0.205818	-0.592197	0.197792	0.562204	0.451711	1.21677	0.595816	-1.21347	0.313188	-0.795215																			N/A	N/A	N/A	N/A	GO:0042254	ribosome biogenesis	GO:0005634;GO:0005654;GO:0005730;GO:0005819;GO:0031428;GO:0032040	box C/D RNP complex;nucleolus;nucleoplasm;nucleus;small-subunit processome;spindle	GO:0030515	snoRNA binding
Tb927.2.2520:mRNA-p1;Tb927.2.2510:mRNA-p1	Tb927.2.2520:mRNA-p1;Tb927.2.2510:mRNA-p1	Tb927.2.2520;Tb927.2.2510	Mitochondrial outer membrane protein porin 1;Mitochondrial outer membrane protein porin 2	0.231801	-0.418971	0.15885	0.850096	0.227055	-0.54088	0.506223	-1.13088	1.22485	2.95718	1.46145	3.33549	1.4731	3.38434	0.299326	-0.542902	0.0823628	-0.170156														+		+		+	GO:0005741	mitochondrial outer membrane	GO:0008308	voltage-gated anion channel activity	GO:0098656	anion transmembrane transport	GO:0005739;GO:0005741;GO:0016281;GO:0031307;GO:0046930;GO:0140525	antipodal site;eukaryotic translation initiation factor 4F complex;integral component of mitochondrial outer membrane;mitochondrial outer membrane;mitochondrion;pore complex	GO:0008308;GO:0015288	porin activity;voltage-gated anion channel activity
Tb927.9.9450:mRNA-p1	Tb927.9.9450:mRNA-p1	Tb927.9.9450	zinc finger protein family member, putative	0.97842	-0.424195	0.925611	-1.93283	0.786463	-0.353986	1.50096	-0.721874	1.62196	-1.32383	0.647422	-0.518329	0.245612	0.370577	0.0591114	-0.104415	1.16295	2.28064																			N/A	N/A	GO:0046872	metal ion binding	N/A	N/A	GO:0005737	cytoplasm	GO:0003723;GO:0061630	RNA binding;ubiquitin protein ligase activity
Tb927.10.14520:mRNA-p1	Tb927.10.14520:mRNA-p1	Tb927.10.14520	Basal body protein	0.407348	-0.429028	0.289707	-0.429573	0.00506055	-0.00922584	0.332635	-0.576193	0.875313	-1.19463	0.343682	-0.556125	0.547855	-1.072	1.08702	-1.17296	0.604995	-0.721062																			N/A	N/A	N/A	N/A	N/A	N/A	GO:0036064;GO:0120280	ciliary basal body;ciliary pro-basal body	N/A	N/A
Tb927.8.5490:mRNA-p1	Tb927.8.5490:mRNA-p1	Tb927.8.5490	Nucleolar protein,Nop52, putative	0.177257	-0.432073	1.0732	-1.79401	0.740993	-1.34481	1.38754	-2.47863	1.44316	-2.064	0.868717	-1.47107	0.251293	-0.476684	0.268547	-0.639233	1.69144	-2.17252																			GO:0030688	preribosome, small subunit precursor	N/A	N/A	GO:0006364	rRNA processing	GO:0005634;GO:0005730;GO:0005737;GO:0030687	cytoplasm;nucleolus;nucleus;preribosome, large subunit precursor	N/A	N/A
Tb927.8.1960:mRNA-p1	Tb927.8.1960:mRNA-p1	Tb927.8.1960	CCR4-NOT transcription complex subunit 11	0.426998	-0.438477	0.106365	-0.374378	0.26885	-0.349268	1.20222	-1.47839	0.273095	0.358825	0.242934	0.319814	0.0894029	-0.138816	1.123	-1.41139	0.310431	-0.512294																			GO:0005634;GO:0005737;GO:0030014	CCR4-NOT complex;cytoplasm;nucleus	N/A	N/A	GO:0031047	gene silencing by RNA	GO:0005634;GO:0005737;GO:0030014	CCR4-NOT complex;cytoplasm;nucleus	N/A	N/A
Tb927.3.3150:mRNA-p1;Tb11.v5.0796.1-p1	Tb927.3.3150:mRNA-p1	Tb927.3.3150	hypothetical protein, conserved	0.37125	-0.440991	1.84131	5.05161	2.42742	3.87211	0.66603	-0.627087	1.39464	-2.11817	0.0426386	-0.0856377	0.653404	-0.547395	0.559287	-0.485746	1.17979	-0.679455						+		+											N/A	N/A	N/A	N/A	N/A	N/A	GO:0005634;GO:0005643;GO:0005737	cytoplasm;nuclear pore;nucleus	N/A	N/A
Tb927.5.2130:mRNA-p1	Tb927.5.2130:mRNA-p1	Tb927.5.2130	Lariat debranching enzyme, C-terminal domain containing protein, putative	0.132246	-0.443078	0.093867	-0.357305	0.30329	0.647865	1.2665	-2.33213	1.13134	-2.20004	1.13311	-1.75271	1.08997	-1.37779	1.40901	-1.66846	0.121369	-0.278213																			N/A	N/A	GO:0016787;GO:0016788	hydrolase activity;hydrolase activity, acting on ester bonds	GO:0006397	mRNA processing	GO:0005634;GO:0031981	nuclear lumen;nucleus	GO:0008419	RNA lariat debranching enzyme activity
Tb927.1.1240:mRNA-p1;Tb11.v5.0356.1-p1	Tb927.1.1240:mRNA-p1;Tb11.v5.0356.1-p1	Tb927.1.1240;Tb11.v5.0356	cytidine triphosphate synthase, putative;cytidine triphosphate synthase, putative	0.340474	-0.449504	1.27913	-1.79534	0.174957	-0.311343	0.834451	-1.05615	0.499219	0.714077	0.511711	-0.725042	0.0719874	-0.145594	0.869726	-0.847195	0.556039	-0.741776																			N/A	N/A	GO:0003883;GO:0005524	ATP binding;CTP synthase activity	GO:0006221;GO:0006241;GO:0006541;GO:0044210	CTP biosynthetic process;'de novo' CTP biosynthetic process;glutamine metabolic process;pyrimidine nucleotide biosynthetic process	GO:0005737;GO:0005829;GO:0036064	ciliary basal body;cytoplasm;cytosol	GO:0003883;GO:0042802	CTP synthase activity;identical protein binding
Tb927.10.12990:mRNA-p1	Tb927.10.12990:mRNA-p1	Tb927.10.12990	predicted ankyrin repeat family protein	0.477769	-0.449738	0.0365085	0.11319	0.824442	-0.617155	0.899788	-1.14003	0.140959	-0.477208	2.41689	-1.76837	1.7368	-1.52844	0.235856	-0.305894	0.917002	-0.793701																			N/A	N/A	GO:0005515	protein binding	N/A	N/A	GO:0005654;GO:0005737;GO:0097014	ciliary plasm;cytoplasm;nucleoplasm	N/A	N/A
Tb927.8.6970:mRNA-p1	Tb927.8.6970:mRNA-p1	Tb927.8.6970	3-methylcrotonyl-CoA carboxylase alpha subunit, putative	0.728027	-0.450742	0.130276	-0.177697	1.00218	-0.588045	0.430834	-0.28278	0.609034	-0.454562	1.63949	-1.14001	2.32489	-1.92606	0.411562	-0.210936	1.46891	-3.46146																			N/A	N/A	GO:0005524;GO:0046872	ATP binding;metal ion binding	N/A	N/A	GO:0005737;GO:0005739;GO:0005929;GO:0120121	cilium;cytoplasm;mitochondrion;tripartite attachment complex	GO:0004485;GO:0009374;GO:0016421	biotin binding;CoA carboxylase activity;methylcrotonoyl-CoA carboxylase activity
Tb927.11.9970:mRNA-p1	Tb927.11.9970:mRNA-p1	Tb927.11.9970	Small acidic protein family, putative	0.146109	-0.451326	0.992673	-1.20472	1.7667	-0.704062	0.182525	-0.262693	1.09997	-0.927372	0.870166	-0.927934	2.05621	-1.10215	1.40211	-1.17354	2.7745	-1.26862																			N/A	N/A	N/A	N/A	N/A	N/A	GO:0005634;GO:0005654;GO:0005730	nucleolus;nucleoplasm;nucleus	N/A	N/A
Tb927.10.15680:mRNA-p1	Tb927.10.15680:mRNA-p1	Tb927.10.15680	hypothetical protein, conserved	0.507339	-0.452437	1.36951	-1.17694	1.32601	-1.1157	1.30152	-1.58933	2.11969	-2.30931	2.06956	2.13001	0.453786	-0.591674	1.12567	-1.79666	1.27375	-0.910114															+	+			GO:0016021	integral component of membrane	N/A	N/A	N/A	N/A	GO:0005737	cytoplasm	N/A	N/A
Tb927.10.15300:mRNA-p1;Tb11.v5.0515.1-p1	Tb927.10.15300:mRNA-p1;Tb11.v5.0515.1-p1	Tb927.10.15300;Tb11.v5.0515	protein kinase, putative;Calcium/calmodulin-dependent protein kinase kinase, putative	0.397973	-0.462818	1.72429	-1.49886	1.62703	-1.27351	0.827667	-1.18618	2.12939	-1.93136	1.02544	-1.76169	0.470633	-0.403403	0.328181	0.599867	0.798627	-0.685323																			N/A	N/A	GO:0004672;GO:0005524	ATP binding;protein kinase activity	GO:0006468	protein phosphorylation	GO:0005634;GO:0005737;GO:0030133;N/A	cytoplasm;N/A;nucleus;transport vesicle	GO:0004674;GO:0005524;N/A	ATP binding;N/A;protein serine/threonine kinase activity
Tb927.7.210:mRNA-p1	Tb927.7.210:mRNA-p1	Tb927.7.210	Proline dehydrogenase, mitochondrial	0.275181	-0.462908	0.0169032	0.0356989	0.0230944	-0.0491619	0.0873516	-0.234404	0.368657	0.65122	0.603659	-1.02156	0.0974572	0.352713	0.558644	-0.896729	0.869391	-1.06669																			N/A	N/A	GO:0004657	proline dehydrogenase activity	GO:0006562	proline catabolic process	GO:0005737;GO:0005739;GO:0020023	cytoplasm;kinetoplast;mitochondrion	GO:0004657;GO:0071949	FAD binding;proline dehydrogenase activity
Tb927.1.1700:mRNA-p1	Tb927.1.1700:mRNA-p1	Tb927.1.1700	AATF protein, putative	0.116487	-0.464254	1.1804	-2.85205	1.52021	-3.15925	1.54139	-3.21207	1.88886	-4.19639	1.48475	-2.82736	1.53157	-2.90539	0.0340244	-0.157544	1.55589	-2.8836																			N/A	N/A	N/A	N/A	N/A	N/A	GO:0005634;GO:0005730	nucleolus;nucleus	N/A	N/A
Tb927.9.13330:mRNA-p1	Tb927.9.13330:mRNA-p1	Tb927.9.13330	hypothetical protein, conserved	0.338242	-0.468857	1.89226	-2.46241	0.478276	-0.671261	1.08125	-2.68581	0.951358	0.90202	0.579582	-0.514222	0.42963	-0.392143	0.890358	-1.09062	0.826315	-0.694865														+					N/A	N/A	N/A	N/A	N/A	N/A	GO:0005783;GO:0005794;GO:0005795;GO:0012507;GO:0120120	bilobe structure;endoplasmic reticulum;ER to Golgi transport vesicle membrane;Golgi apparatus;Golgi stack	N/A	N/A
Tb11.v5.0713.1-p1	Tb11.v5.0713.1-p1	Tb11.v5.0713	Retrotransposon hot spot protein 6 (RHS6), putative	0.235555	-0.469673	0.739211	1.66521	1.32909	1.41143	1.09347	-1.85173	0.762483	1.30035	0.0777735	-0.0959975	2.33528	3.20539	0.360355	1.01509	0.885161	-0.882581																		+	N/A	N/A	N/A	N/A	N/A	N/A	GO:0005634	nucleus	N/A	N/A
Tb927.11.2110:mRNA-p1	Tb927.11.2110:mRNA-p1	Tb927.11.2110	Snf7, putative	0.398197	-0.473886	0.225849	-0.356472	0.220325	0.34466	0.69749	-1.05125	0.872899	-1.36532	1.07254	-1.4587	0.315323	-0.542679	0.17641	0.385454	0.355079	0.872539																			N/A	N/A	N/A	N/A	GO:0007034	vacuolar transport	GO:0000815;GO:0005737;GO:0005771;GO:0030133;GO:0031981;GO:0097014	ciliary plasm;cytoplasm;ESCRT III complex;multivesicular body;nuclear lumen;transport vesicle	N/A	N/A
Tb927.9.1970:mRNA-p1	Tb927.9.1970:mRNA-p1	Tb927.9.1970	syntaxin binding protein 1, putative	0.533614	-0.474879	0.977026	-0.879505	0.703604	-0.757504	1.0512	-0.876626	1.29843	-1.2808	0.558983	-0.93995	0.434373	-0.744418	0.304058	0.377862	0.0235084	-0.0339553																			N/A	N/A	N/A	N/A	GO:0006904;GO:0016192	vesicle docking involved in exocytosis;vesicle-mediated transport	GO:0020016	ciliary pocket	GO:0000149	SNARE binding
Tb927.1.4680:mRNA-p1	Tb927.1.4680:mRNA-p1	Tb927.1.4680	Kinetochore interacting protein 6	0.755582	-0.479758	0.0219325	0.120297	0.56243	-0.662441	0.481094	-0.74449	1.16109	-0.78057	1.11547	-1.49893	1.39106	-1.18116	0.969699	-0.981887	0.782032	-0.903291																			N/A	N/A	N/A	N/A	N/A	N/A	GO:0000776;GO:0005634;GO:0005654	kinetochore;nucleoplasm;nucleus	N/A	N/A
Tb927.11.1990:mRNA-p1	Tb927.11.1990:mRNA-p1	Tb927.11.1990	arginyl-tRNA synthetase, putative	0.495285	-0.484236	1.18652	3.236	0.249999	-0.405951	1.0662	-2.13846	1.46759	-2.04648	1.46267	-1.91257	0.538974	-0.685912	0.820153	-1.05338	1.68137	-1.47048																			GO:0005737	cytoplasm	GO:0000166;GO:0004812;GO:0004814;GO:0005524	aminoacyl-tRNA ligase activity;arginine-tRNA ligase activity;ATP binding;nucleotide binding	GO:0006418;GO:0006420	arginyl-tRNA aminoacylation;tRNA aminoacylation for protein translation	GO:0005737;GO:0097014	ciliary plasm;cytoplasm	GO:0004814	arginine-tRNA ligase activity
Tb927.10.14180:mRNA-p1	Tb927.10.14180:mRNA-p1	Tb927.10.14180	protein transport protein SEC13	0.257702	-0.485671	1.16351	-1.68813	0.0524274	0.0922394	0.162579	0.302485	1.34145	1.77567	0.5882	-0.786776	0.234868	0.49172	0.930516	-0.987758	0.514102	-0.523045														+					GO:0000139	Golgi membrane	GO:0005198;GO:0005515	protein binding;structural molecule activity	N/A	N/A	GO:0005634;GO:0005643;GO:0005794;GO:0005829;GO:0030127;GO:0031080	COPII vesicle coat;cytosol;Golgi apparatus;nuclear pore;nuclear pore outer ring;nucleus	N/A	N/A
Tb927.11.290:mRNA-p1	Tb927.11.290:mRNA-p1	Tb927.11.290	Phosphatase and tensin homolog, putative	0.171331	-0.487892	0.104503	-0.41258	0.102606	0.396988	0.172738	-0.650414	0.360154	-1.3008	1.32196	4.41823	0.109818	0.45549	0.122699	-0.400189	0.173788	-0.493509																+			N/A	N/A	GO:0008138;GO:0016791	phosphatase activity;protein tyrosine/serine/threonine phosphatase activity	GO:0006470;GO:0016311	dephosphorylation;protein dephosphorylation	GO:0005737	cytoplasm	GO:0004439	phosphatidylinositol-4,5-bisphosphate 5-phosphatase activity
Tb927.3.3590:mRNA-p1	Tb927.3.3590:mRNA-p1	Tb927.3.3590	U3 small nucleolar ribonucleoprotein protein MPP10, putative	0.196494	-0.488149	2.42038	-2.23076	1.35984	-0.749476	1.79358	-1.11226	1.94099	-1.76326	2.59505	-2.15188	2.45628	-2.40794	1.87607	-1.38649	2.49365	-1.72725																			GO:0005634;GO:0005732;GO:0034457	Mpp10 complex;nucleus;sno(s)RNA-containing ribonucleoprotein complex	N/A	N/A	GO:0006364	rRNA processing	GO:0005634;GO:0005730;GO:0005737;GO:0032040;GO:0034457	cytoplasm;Mpp10 complex;nucleolus;nucleus;small-subunit processome	N/A	N/A
Tb927.10.13880:mRNA-p1	Tb927.10.13880:mRNA-p1	Tb927.10.13880	hypothetical protein, conserved	0.49506	-0.492002	0.199332	-0.33412	0.248672	-0.357911	0.707047	-1.21952	1.04716	2.54247	1.11241	-1.44768	0.959533	1.23099	0.48836	-0.627422	0.24022	-0.260422														+					N/A	N/A	N/A	N/A	N/A	N/A	GO:0005634;GO:0005643;GO:0005737	cytoplasm;nuclear pore;nucleus	N/A	N/A
Tb927.11.7520:mRNA-p1	Tb927.11.7520:mRNA-p1	Tb927.11.7520	hypothetical protein, conserved	0.244906	-0.492399	1.34733	-1.99693	1.47289	-1.15013	0.742836	-0.746928	1.22985	-1.46062	1.36384	-1.72354	0.821653	-0.5811	0.292618	-0.232045	0.445194	1.34165																			N/A	N/A	N/A	N/A	N/A	N/A	GO:0005737;GO:0097014	ciliary plasm;cytoplasm	N/A	N/A
Tb927.4.2850:mRNA-p1	Tb927.4.2850:mRNA-p1	Tb927.4.2850	hypothetical protein, conserved	0.422913	-0.492935	0.310561	-0.308034	0.55152	-0.508691	0.254375	-0.259014	0.907688	-1.1198	3.61453	8.33434	2.475	5.17308	1.10933	-2.51109	0.505881	-0.51874															+	+		+	N/A	N/A	N/A	N/A	N/A	N/A	GO:0005634;GO:0005643	nuclear pore;nucleus	N/A	N/A
Tb927.7.4390:mRNA-p1	Tb927.7.4390:mRNA-p1	Tb927.7.4390	threonine synthase, putative	0.421222	-0.498523	0.231542	-0.84234	0.235687	-0.380892	0.42406	-0.520287	2.09432	3.82672	0.229705	-0.712416	0.0896184	0.29342	0.884048	-0.785974	1.03192	2.39233													+	+					N/A	N/A	GO:0004795;GO:0030170	pyridoxal phosphate binding;threonine synthase activity	GO:0006520;GO:0009088	cellular amino acid metabolic process;threonine biosynthetic process	GO:0005737;GO:0097014	ciliary plasm;cytoplasm	GO:0004795	threonine synthase activity
Tb927.2.4280:mRNA-p1	Tb927.2.4280:mRNA-p1	Tb927.2.4280	kinetoplastid-specific dual specificity phosphatase, putative	0.489027	-0.499989	0.857698	2.44953	1.64111	2.77195	0.697424	-0.980639	0.953389	-1.19267	0.185169	-0.556029	0.638862	-0.856611	0.0122209	-0.023922	0.331172	-0.327529																			N/A	N/A	GO:0008138;GO:0016791	phosphatase activity;protein tyrosine/serine/threonine phosphatase activity	GO:0006470;GO:0016311	dephosphorylation;protein dephosphorylation	GO:0005737;GO:0030863	cortical cytoskeleton;cytoplasm	GO:0008138	protein tyrosine/serine/threonine phosphatase activity
Tb927.10.14950:mRNA-p1	Tb927.10.14950:mRNA-p1	Tb927.10.14950	Zinc finger CCCH domain-containing protein 40	0.333786	-0.506622	1.11006	-1.69027	0.497138	-0.641667	0.662531	-1.24945	0.0134362	-0.040219	1.19283	-1.56903	1.0542	-1.37136	0.840363	-1.01144	0.269232	0.855505																			N/A	N/A	GO:0046872	metal ion binding	N/A	N/A	GO:0005737;GO:0010494	cytoplasm;cytoplasmic stress granule	GO:0003723;GO:0003729	mRNA binding;RNA binding
Tb927.9.3630:mRNA-p1;Tb11.v5.0530.1-p1	Tb927.9.3630:mRNA-p1;Tb11.v5.0530.1-p1	Tb927.9.3630;Tb11.v5.0530	BSD domain containing protein, putative;BSD domain containing protein, putative	0.215312	-0.508076	0.38197	-1.01459	0.120401	-0.3957	0.0906534	-0.291697	0.646971	-1.77338	0.663799	-1.7046	0.0282841	-0.092377	0.387843	-0.837128	1.29711	3.32174																			N/A	N/A	N/A	N/A	N/A	N/A	GO:0020016;GO:0030133;N/A	ciliary pocket;N/A;transport vesicle	N/A	N/A
Tb927.10.5340:mRNA-p1;Tb927.10.5330:mRNA-p1;Tb11.v5.1060.1-p1;Tb11.v5.0243.1-p1	Tb927.10.5340:mRNA-p1;Tb927.10.5330:mRNA-p1;Tb11.v5.1060.1-p1;Tb11.v5.0243.1-p1	Tb927.10.5340;Tb927.10.5330;Tb11.v5.1060;Tb11.v5.0243	40S ribosomal protein S18, putative;40S ribosomal protein S18, putative;40S ribosomal protein S18, putative;40S ribosomal protein S18, putative	0.369274	-0.511327	1.02547	-4.16879	1.31685	-4.34776	2.0957	-5.99677	0.936126	-4.05178	2.58727	-6.80642	0.534438	-0.939587	0.315701	0.472938	0.940268	-1.55116																			GO:0005840	ribosome	GO:0003676;GO:0003723;GO:0003735	nucleic acid binding;RNA binding;structural constituent of ribosome	GO:0006412	translation	GO:0000314;GO:0005622;GO:0005737;GO:0005829;GO:0005840;GO:0015935;GO:0031981	cytoplasm;cytosol;intracellular anatomical structure;nuclear lumen;organellar small ribosomal subunit;ribosome;small ribosomal subunit	GO:0003723;GO:0003729;GO:0003735;GO:0044877	mRNA binding;protein-containing complex binding;RNA binding;structural constituent of ribosome
Tb927.10.14330:mRNA-p1	Tb927.10.14330:mRNA-p1	Tb927.10.14330	Utp14 protein, putative	0.359628	-0.512255	0.164127	-0.571959	1.35411	-1.71001	0.99653	-1.09787	1.33303	2.0971	1.67234	-2.16994	1.58926	-2.02379	1.15195	-1.42972	1.10291	-1.35586														+					GO:0032040	small-subunit processome	N/A	N/A	GO:0006364	rRNA processing	GO:0005634;GO:0005730;GO:0005737;GO:0032040;GO:0097014	ciliary plasm;cytoplasm;nucleolus;nucleus;small-subunit processome	N/A	N/A
Tb927.8.6660:mRNA-p1	Tb927.8.6660:mRNA-p1	Tb927.8.6660	paraflagellar rod component, putative	0.554682	-0.524115	2.0861	-2.68063	2.35777	-0.354862	0.121668	-0.28087	0.142135	0.54905	0.324373	-0.496763	2.66638	2.21441	3.21295	-1.64001	0.144149	0.619813																		+	N/A	N/A	N/A	N/A	N/A	N/A	GO:0097740	paraflagellar rod	N/A	N/A
Tb927.11.1840:mRNA-p1;Tb11.1380.1-p1	Tb927.11.1840:mRNA-p1;Tb11.1380.1-p1	Tb927.11.1840;Tb11.1380	hypothetical protein, conserved;hypothetical protein, conserved	0.330231	-0.531889	0.889618	-1.91984	0.105603	-0.26722	0.402486	-1.26036	0.329718	0.84949	1.10377	-2.95196	0.0312807	-0.077569	0.971279	-1.33586	1.15662	3.61333																			N/A	N/A	N/A	N/A	N/A	N/A	GO:0030863;N/A	cortical cytoskeleton;N/A	N/A	N/A
Tb927.2.5120:mRNA-p1	Tb927.2.5120:mRNA-p1	Tb927.2.5120	Vesicle-associated membrane protein 7	0.412053	-0.53337	0.0847248	0.168013	0.0842074	0.234503	0.564225	-0.930321	0.312196	-0.534722	1.58379	2.7959	0.103139	-0.241944	0.336025	-0.487803	0.0534648	-0.0853214															+	+			GO:0016021	integral component of membrane	N/A	N/A	GO:0016192	vesicle-mediated transport	GO:0000331;GO:0005886;GO:0020016;GO:0020022;GO:0030133	acidocalcisome;ciliary pocket;contractile vacuole;plasma membrane;transport vesicle	N/A	N/A
Tb927.2.1080:mRNA-p1	Tb927.2.1080:mRNA-p1	Tb927.2.1080	retrotransposon hot spot protein 5 (RHS5), putative	0.34602	-0.533484	0.300315	-0.582133	0.250283	0.396803	0.481644	-0.713941	1.9259	1.60309	1.77975	-1.40841	2.68254	2.9712	1.33893	-1.26246	2.0302	-1.14618													+	+				+	N/A	N/A	N/A	N/A	N/A	N/A	GO:0005634	nucleus	N/A	N/A
Tb927.10.230:mRNA-p1	Tb927.10.230:mRNA-p1	Tb927.10.230	proteasome subunit alpha type-5, putative	0.321581	-0.535439	0.091668	-0.219415	0.27891	-0.549165	0.716239	-1.36099	0.424993	-0.832357	0.412304	-0.87604	0.0145588	0.0349766	0.223165	-0.393608	0.440855	1.88395																			GO:0005839;GO:0019773	proteasome core complex;proteasome core complex, alpha-subunit complex	N/A	N/A	GO:0006511;GO:0043161;GO:0051603	proteasome-mediated ubiquitin-dependent protein catabolic process;proteolysis involved in cellular protein catabolic process;ubiquitin-dependent protein catabolic process	GO:0005634;GO:0005654;GO:0005737;GO:0005829;GO:0005839;GO:0019773	cytoplasm;cytosol;nucleoplasm;nucleus;proteasome core complex;proteasome core complex, alpha-subunit complex	GO:0004175	endopeptidase activity
Tb927.10.14240:mRNA-p1;Tb11.v5.0859.1-p1	Tb927.10.14240:mRNA-p1;Tb11.v5.0859.1-p1	Tb927.10.14240;Tb11.v5.0859	N-myristoyl transferase, putative;N-myristoyltransferase	0.200678	-0.538982	0.0250585	-0.104233	0.105976	0.271743	0.542021	-1.29723	0.0877801	0.375305	1.01328	-1.93264	0.232685	-0.514207	0.0802913	-0.295005	0.744145	1.49095																			N/A	N/A	GO:0004379	glycylpeptide N-tetradecanoyltransferase activity	GO:0006499	N-terminal protein myristoylation	GO:0005737;N/A	cytoplasm;N/A	GO:0004379;GO:0019107;N/A	glycylpeptide N-tetradecanoyltransferase activity;myristoyltransferase activity;N/A
Tb927.10.7100:mRNA-p1;Tb11.v5.0580.1-p1	Tb927.10.7100:mRNA-p1;Tb11.v5.0580.1-p1	Tb927.10.7100;Tb11.v5.0580	delta-6 fatty acid desaturase, putative;delta-4 fatty acid desaturase	0.403795	-0.545041	0.929812	-1.12764	0.203886	-0.344184	0.122464	-0.206978	1.32285	-1.76089	2.37887	3.99799	0.308907	0.752976	0.866796	-0.801023	0.444823	-0.431381															+	+			GO:0016021	integral component of membrane	GO:0016491	oxidoreductase activity	GO:0006629	lipid metabolic process	GO:0005635;GO:0005783	endoplasmic reticulum;nuclear envelope	GO:0004768;GO:0016491	oxidoreductase activity;stearoyl-CoA 9-desaturase activity
Tb927.1.2400:mRNA-p1;Tb927.1.2380:mRNA-p1;Tb927.1.2360:mRNA-p1;Tb927.1.2340:mRNA-p1	Tb927.1.2400:mRNA-p1;Tb927.1.2380:mRNA-p1;Tb927.1.2360:mRNA-p1;Tb927.1.2340:mRNA-p1	Tb927.1.2400;Tb927.1.2380;Tb927.1.2360;Tb927.1.2340	alpha tubulin;alpha tubulin;alpha tubulin;alpha tubulin	0.124379	-0.546465	0.624118	2.90389	0.701293	3.09266	0.499642	2.24619	1.17977	5.33136	0.554531	2.47421	1.4463	6.80715	0.0366928	-0.162042	0.0137559	0.0619151														+				+	GO:0005874	microtubule	GO:0003924;GO:0005200;GO:0005525	GTP binding;GTPase activity;structural constituent of cytoskeleton	GO:0007017	microtubule-based process	GO:0005737;GO:0005874;GO:0030863;GO:0036064	ciliary basal body;cortical cytoskeleton;cytoplasm;microtubule	GO:0005200;GO:0005525	GTP binding;structural constituent of cytoskeleton
Tb927.11.6780:mRNA-p1	Tb927.11.6780:mRNA-p1	Tb927.11.6780	regulator of chromatin condensation, putative	0.286124	-0.548449	0.193859	-0.754257	0.871943	-1.85449	0.393934	-0.879189	0.553373	-1.60686	0.439055	-1.01545	0.712436	-2.00852	0.147982	-0.391879	1.46952	3.3344																			N/A	N/A	N/A	N/A	N/A	N/A	GO:0005737;GO:0031981;GO:0097014	ciliary plasm;cytoplasm;nuclear lumen	GO:0003682	chromatin binding
Tb927.11.6740:mRNA-p1	Tb927.11.6740:mRNA-p1	Tb927.11.6740	pumilio/PUF RNA binding protein 10, putative	0.399549	-0.549166	0.982837	-1.20273	0.306502	-0.679018	0.760423	-1.43642	0.912284	-1.12933	1.24627	-1.84115	0.278731	-0.499638	1.61657	-1.45553	0.67806	-0.845661																			N/A	N/A	GO:0003723	RNA binding	N/A	N/A	GO:0005634;GO:0005730;GO:0005737	cytoplasm;nucleolus;nucleus	GO:0003723;GO:0003729;GO:0005515	mRNA binding;protein binding;RNA binding
Tb927.11.12030:mRNA-p1	Tb927.11.12030:mRNA-p1	Tb927.11.12030	hypothetical protein, conserved	0.267083	-0.550049	0.0978479	0.384982	0.085331	0.245146	0.295426	-0.873807	1.07402	-2.61001	0.219638	-0.902438	0.438832	-1.15054	0.625146	-1.17267	0.794819	-1.32581																			GO:0005730	nucleolus	GO:0005515	protein binding	GO:0042273	ribosomal large subunit biogenesis	GO:0005634;GO:0005737	cytoplasm;nucleus	N/A	N/A
Tb927.3.2230:mRNA-p1	Tb927.3.2230:mRNA-p1	Tb927.3.2230	succinyl-CoA synthetase alpha subunit, putative	0.483802	-0.551303	0.0873203	-0.207069	0.623107	-1.14841	1.82644	-2.07436	0.254316	0.753783	1.3161	-0.816966	1.47634	2.06526	0.6427	-0.80032	1.62951	-1.38314																			N/A	N/A	GO:0000166;GO:0003824	catalytic activity;nucleotide binding	N/A	N/A	GO:0005739;GO:0009361	mitochondrion;succinate-CoA ligase complex (ADP-forming)	GO:0004775;GO:0004776	succinate-CoA ligase (ADP-forming) activity;succinate-CoA ligase (GDP-forming) activity
Tb927.11.2170:mRNA-p1	Tb927.11.2170:mRNA-p1	Tb927.11.2170	hypothetical protein, conserved	0.334414	-0.552149	0.682315	-0.834907	0.0473216	0.0735601	0.336071	-0.530245	0.721297	-1.07205	1.47783	2.01803	0.608356	-0.821989	0.432943	-0.572301	1.20578	-1.23903																+			N/A	N/A	N/A	N/A	N/A	N/A	GO:0005739	mitochondrion	N/A	N/A
Tb927.11.3070:mRNA-p1	Tb927.11.3070:mRNA-p1	Tb927.11.3070	ribosome assembly protein RRB1, putative	0.158952	-0.562391	0.314324	-0.668029	0.219215	-0.414382	0.278289	-0.418566	1.13204	-2.00721	0.198141	-0.58589	0.828206	-1.30075	1.20681	-1.229	0.746621	-0.970835																			N/A	N/A	GO:0005515	protein binding	N/A	N/A	GO:0005634;GO:0005730	nucleolus;nucleus	N/A	N/A
Tb927.3.3450:mRNA-p1	Tb927.3.3450:mRNA-p1	Tb927.3.3450	ADP-ribosylation factor-like protein 3, putative	0.41694	-0.563983	0.131363	-0.543029	0.0648311	-0.125878	1.00155	-1.55319	0.810994	1.25534	0.131734	-0.394733	0.265329	0.571386	0.962091	-1.23971	0.000685879	0.00259081														+					N/A	N/A	GO:0005525	GTP binding	N/A	N/A	GO:0005634;GO:0005737;GO:0005886;GO:0005929;GO:0005930;GO:0015630;GO:0020018;GO:0036064;GO:0060170	axoneme;ciliary basal body;ciliary membrane;ciliary pocket membrane;cilium;cytoplasm;microtubule cytoskeleton;nucleus;plasma membrane	GO:0005515;GO:0005525	GTP binding;protein binding
Tb927.3.1090:mRNA-p1	Tb927.3.1090:mRNA-p1	Tb927.3.1090	U1 small nuclear ribonucleoprotein 24 kDa	0.366354	-0.569155	0.724534	-0.795826	1.35955	-1.5285	1.13181	-1.24722	2.00441	-2.13341	2.19288	-2.48271	1.53933	-1.25663	0.820184	-1.14651	0.00957406	0.0510248																			N/A	N/A	N/A	N/A	N/A	N/A	GO:0005634;GO:0005654;GO:0005685;GO:0005737;GO:0097014	ciliary plasm;cytoplasm;nucleoplasm;nucleus;U1 snRNP	N/A	N/A
Tb927.10.7960:mRNA-p1	Tb927.10.7960:mRNA-p1	Tb927.10.7960	hypothetical protein, conserved	0.276236	-0.574217	0.0438643	0.188465	0.175621	-0.416556	0.815781	-1.70085	0.810927	1.70841	0.0887849	0.319147	0.368492	-0.651368	0.399167	-0.654794	1.673	4.27556														+					N/A	N/A	N/A	N/A	N/A	N/A	GO:0005737;GO:0005930	axoneme;cytoplasm	N/A	N/A
Tb927.11.550:mRNA-p1	Tb927.11.550:mRNA-p1	Tb927.11.550	Suppressor of clathrin deficiency 6, putative	0.244338	-0.581332	0.136427	0.373334	1.33095	-1.35652	0.926575	-1.63273	0.140126	0.255924	2.0032	-2.1367	0.176883	-0.287038	2.04972	-1.2591	0.13291	0.328215																			N/A	N/A	N/A	N/A	N/A	N/A	GO:0000932;GO:0005737;GO:0035770;GO:1990124	cytoplasm;messenger ribonucleoprotein complex;P-body;ribonucleoprotein granule	GO:0003729	mRNA binding
Tb927.11.8050:mRNA-p1	Tb927.11.8050:mRNA-p1	Tb927.11.8050	Sas10/Utp3/C1D family/Sas10 C-terminal domain containing protein, putative	0.390007	-0.581848	1.03929	-1.69663	1.01851	-1.46651	1.54337	-2.31741	0.707016	-1.76708	1.47431	-2.18409	0.974919	-1.39377	1.89773	-2.45919	1.39939	-1.42664																			N/A	N/A	N/A	N/A	N/A	N/A	GO:0005634;GO:0005737	cytoplasm;nucleus	N/A	N/A
Tb927.10.5770:mRNA-p1	Tb927.10.5770:mRNA-p1	Tb927.10.5770	Valosin-containing protein	0.250374	-0.590508	0.493048	-1.34254	0.635681	-1.44566	0.440575	-1.10446	0.192888	0.503344	0.901021	-2.09543	0.132115	0.624761	0.316124	-0.671115	0.11735	-0.261771																			N/A	N/A	GO:0005524;GO:0016787;GO:0016887	ATP binding;ATP hydrolysis activity;hydrolase activity	N/A	N/A	GO:0005634;GO:0005654;GO:0005737;GO:0005829;GO:0016020;GO:0034098;GO:0098554	cytoplasm;cytoplasmic side of endoplasmic reticulum membrane;cytosol;membrane;nucleoplasm;nucleus;VCP-NPL4-UFD1 AAA ATPase complex	GO:0016887;GO:0031593;GO:0042802	ATP hydrolysis activity;identical protein binding;polyubiquitin modification-dependent protein binding
Tb927.7.660:mRNA-p1	Tb927.7.660:mRNA-p1	Tb927.7.660	Jumonji domain protein CLD1	0.367395	-0.596886	0.348488	-0.295339	0.260975	0.150247	0.939347	-1.37373	0.768525	-0.383354	1.3771	-1.51984	0.508085	-0.51289	1.04043	-0.705819	0.7365	2.05857																			N/A	N/A	N/A	N/A	N/A	N/A	GO:0005737;GO:0097014	ciliary plasm;cytoplasm	GO:0016706	2-oxoglutarate-dependent dioxygenase activity
Tb927.8.6170:mRNA-p1	Tb927.8.6170:mRNA-p1	Tb927.8.6170	transketolase, putative	1.17207	-0.598667	0.624323	-0.846265	0.258212	-0.43955	1.51784	-1.15415	2.44441	-2.39635	2.21504	-2.54562	1.98728	1.81503	1.52117	-1.2026	0.923072	-1.17624																		+	N/A	N/A	GO:0003824;GO:0004802;GO:0046872	catalytic activity;metal ion binding;transketolase activity	N/A	N/A	GO:0005634;GO:0005737;GO:0005829;GO:0020015;GO:0031981;GO:0097014	ciliary plasm;cytoplasm;cytosol;glycosome;nuclear lumen;nucleus	GO:0004802	transketolase activity
Tb927.2.5030:mRNA-p1	Tb927.2.5030:mRNA-p1	Tb927.2.5030	transcription elongation factor SPT5, putative	0.343263	-0.599772	0.274044	0.645322	1.6731	1.87873	1.47617	-2.04918	1.42185	-1.91963	2.51495	-2.04497	2.52632	-1.71767	1.80898	-2.14722	1.80121	-1.17637																			N/A	N/A	N/A	N/A	GO:0006355;GO:0006357;GO:0032784	regulation of DNA-templated transcription, elongation;regulation of transcription by RNA polymerase II;regulation of transcription, DNA-templated	GO:0005634;GO:0005654;GO:0005840;GO:0031981;GO:0032044	DSIF complex;nuclear lumen;nucleoplasm;nucleus;ribosome	GO:0003729;GO:0003735	mRNA binding;structural constituent of ribosome
Tb927.7.710:mRNA-p1	Tb927.7.710:mRNA-p1	Tb927.7.710	heat shock 70 kDa protein, putative	0.585359	-0.600407	1.49863	-1.28549	1.56584	-1.21774	0.0309988	0.0642506	0.905075	1.90937	1.15654	-0.792754	0.990756	-0.91135	1.29998	-1.07806	0.280201	-0.394829														+					N/A	N/A	N/A	N/A	N/A	N/A	GO:0005737;GO:0005929;GO:0005930	axoneme;cilium;cytoplasm	GO:0005524;GO:0016887;GO:0031072;GO:0044183;GO:0051082;GO:0051787	ATP binding;ATP hydrolysis activity;heat shock protein binding;misfolded protein binding;protein folding chaperone;unfolded protein binding
Tb927.11.4000:mRNA-p1	Tb927.11.4000:mRNA-p1	Tb927.11.4000	hypothetical protein, conserved	0.978693	-0.608647	0.498004	-0.934818	0.588762	-0.530224	0.701973	0.620212	2.52994	3.60311	1.78307	1.93401	0.287353	0.275448	1.33974	-1.54466	1.31009	-0.919027													+	+	+	+			N/A	N/A	N/A	N/A	N/A	N/A	GO:0005930	axoneme	N/A	N/A
Tb927.10.1630:mRNA-p1	Tb927.10.1630:mRNA-p1	Tb927.10.1630	atp-binding cassette sub-family e member 1	0.33591	-0.612498	1.50439	-1.28965	1.35233	-1.36389	0.460645	-0.635761	0.294938	0.342703	1.22171	-1.8823	0.443162	-0.36663	1.28422	-1.30146	0.566113	2.02242																			N/A	N/A	GO:0005524;GO:0016887	ATP binding;ATP hydrolysis activity	N/A	N/A	GO:0005737;GO:0097014	ciliary plasm;cytoplasm	GO:0004540;GO:0005506;GO:0005524;GO:0043024	ATP binding;iron ion binding;ribonuclease activity;ribosomal small subunit binding
Tb927.9.12510:mRNA-p1;REV__Tb927.4.470:mRNA-p1	Tb927.9.12510:mRNA-p1	Tb927.9.12510	ATP-dependent DEAD/H RNA helicase, putative	0.652611	-0.613192	0.464003	-0.950809	1.97803	-1.61075	1.39357	-1.71115	2.55144	1.7382	1.48604	-1.69483	2.37844	1.38575	3.32768	-1.10106	0.518066	1.71676													+	+				+	N/A	N/A	GO:0003676;GO:0004386;GO:0005524	ATP binding;helicase activity;nucleic acid binding	N/A	N/A	GO:0005634;GO:0043186	nucleus;P granule	GO:0003723;GO:0003724;GO:0003729;GO:0004386;GO:0005524	ATP binding;helicase activity;mRNA binding;RNA binding;RNA helicase activity
Tb927.5.930:mRNA-p1;Tb11.v5.0613.1-p1	Tb927.5.930:mRNA-p1;Tb11.v5.0613.1-p1	Tb927.5.930;Tb11.v5.0613	NADH-dependent fumarate reductase, putative;NADH-dependent fumarate reductase	0.476706	-0.615318	0.150304	0.583065	1.57572	-0.945473	0.966601	-0.624536	2.06297	3.38299	2.68673	-1.54776	3.61928	4.67564	0.626576	-0.125285	0.210153	0.674981													+	+			+	+	N/A	N/A	GO:0000104;GO:0016491;GO:0016740;GO:0046872	metal ion binding;oxidoreductase activity;succinate dehydrogenase activity;transferase activity	GO:0017013;GO:0055114	obsolete oxidation-reduction process;protein flavinylation	GO:0005737;GO:0020015;GO:0036064;GO:0097014;N/A	ciliary basal body;ciliary plasm;cytoplasm;glycosome;N/A	GO:0016156;N/A	fumarate reductase (NADH) activity;N/A
Tb927.5.1460:mRNA-p1	Tb927.5.1460:mRNA-p1	Tb927.5.1460	Possible lysine decarboxylase, putative	0.441605	-0.617836	3.26128	6.54705	0.133049	0.0858269	0.451804	-0.68563	0.29229	-0.407617	1.55905	-2.93903	0.796467	-0.743561	0.0817066	-0.160274	0.390615	-0.544285					+	+													N/A	N/A	N/A	N/A	N/A	N/A	GO:0005737;GO:0005829;GO:0097014	ciliary plasm;cytoplasm;cytosol	N/A	N/A
Tb927.1.2750:mRNA-p1	Tb927.1.2750:mRNA-p1	Tb927.1.2750	hypothetical protein, conserved	0.424463	-0.620981	0.335295	-0.796667	1.47891	-1.50017	0.922293	-1.50169	1.40727	-1.82429	0.843644	-1.33751	0.914272	-1.2603	1.09878	-1.01678	0.557398	-0.686124																			N/A	N/A	N/A	N/A	N/A	N/A	GO:0005634;GO:0005654;GO:0005737;GO:0031981;GO:0097014	ciliary plasm;cytoplasm;nuclear lumen;nucleoplasm;nucleus	N/A	N/A
Tb927.10.11080:mRNA-p1	Tb927.10.11080:mRNA-p1	Tb927.10.11080	paraflagellar rod protein	0.343082	-0.622803	0.245167	-0.501176	1.97733	4.10328	0.095419	-0.361722	0.203059	0.750332	0.636785	-1.12301	1.60783	3.15766	0.0834734	-0.138148	0.213244	0.934815																		+	N/A	N/A	N/A	N/A	N/A	N/A	GO:0036064;GO:0097740	ciliary basal body;paraflagellar rod	N/A	N/A
Tb927.9.10010:mRNA-p1	Tb927.9.10010:mRNA-p1	Tb927.9.10010	chaperone protein DnaJ, putative	0.469984	-0.623373	0.395545	-0.762717	0.0278906	0.0716979	0.0697522	-0.149906	0.75164	-1.21487	0.352447	0.612203	0.593249	-0.970347	0.43138	-0.528235	0.393485	-0.649857																			GO:0016021	integral component of membrane	N/A	N/A	GO:0031204	posttranslational protein targeting to membrane, translocation	GO:0005743;GO:0005783;GO:0016021;GO:0031207	endoplasmic reticulum;integral component of membrane;mitochondrial inner membrane;Sec62/Sec63 complex	GO:0003723;GO:0003729;GO:0008320;GO:0051082	mRNA binding;protein transmembrane transporter activity;RNA binding;unfolded protein binding
Tb927.6.3100:mRNA-p1	Tb927.6.3100:mRNA-p1	Tb927.6.3100	Intraflagellar transport complex B protein 46 C terminal, putative	0.265503	-0.623695	0.293838	-0.397371	0.499879	-0.627672	0.0812681	0.175451	1.26023	-1.60248	0.531559	-0.675598	0.377345	-0.583247	0.119259	0.314903	2.36447	2.62102		+																	GO:0005737	cytoplasm	N/A	N/A	GO:0042073	intraciliary transport	GO:0005813;GO:0030990;GO:0030992;GO:0031514	centrosome;intraciliary transport particle;intraciliary transport particle B;motile cilium	N/A	N/A
Tb927.3.4840:mRNA-p1	Tb927.3.4840:mRNA-p1	Tb927.3.4840	ubiquitin carboxyl-terminal hydrolase, putative	0.959741	-0.624223	0.063483	-0.248051	0.172446	-0.120219	0.447071	-0.405424	2.72468	-1.81075	2.76702	-2.27132	0.94298	-1.32175	1.34408	-1.6661	0.0291299	-0.073302																			N/A	N/A	GO:0004843;GO:0008234;GO:0008270	cysteine-type peptidase activity;thiol-dependent deubiquitinase;zinc ion binding	GO:0006511;GO:0016579	protein deubiquitination;ubiquitin-dependent protein catabolic process	GO:0005654;GO:0005737	cytoplasm;nucleoplasm	N/A	N/A
Tb927.10.3810:mRNA-p1	Tb927.10.3810:mRNA-p1	Tb927.10.3810	Nucleoporin NUP65	0.443758	-0.632306	0.364833	-0.722506	0.60848	-1.00249	0.184172	-0.369582	0.189811	-0.378229	2.84141	8.28829	2.63584	6.84311	1.00063	-1.15792	0.176979	-0.252111															+	+	+	+	N/A	N/A	N/A	N/A	N/A	N/A	GO:0005643;GO:0005737;GO:0044611	cytoplasm;nuclear pore;nuclear pore inner ring	N/A	N/A
Tb927.10.1060:mRNA-p1	Tb927.10.1060:mRNA-p1	Tb927.10.1060	T-complex protein 1, delta subunit, putative	0.347291	-0.636934	0.235359	-0.628769	0.149584	-0.391964	0.248553	-0.56648	0.216219	-1.06146	1.20567	-2.52355	0.29755	0.677733	0.965848	-1.46972	0.815056	-1.17557																			N/A	N/A	GO:0005524;GO:0051082	ATP binding;unfolded protein binding	GO:0006457	protein folding	GO:0005737;GO:0005832	chaperonin-containing T-complex;cytoplasm	GO:0051082	unfolded protein binding
Tb927.9.6040:mRNA-p1	Tb927.9.6040:mRNA-p1	Tb927.9.6040	E1-like ubiquitin-activating enzyme, putative	0.718327	-0.643724	0.66559	-0.994409	0.837403	-0.774943	0.280638	-0.28659	0.00933395	0.0444139	0.837712	-0.856704	0.589558	-0.584649	1.28967	-1.13623	0.369756	1.64603																			N/A	N/A	GO:0008641;GO:0046872	metal ion binding;ubiquitin-like modifier activating enzyme activity	N/A	N/A	GO:0005737;GO:0005739;GO:0005829;GO:0097014	ciliary plasm;cytoplasm;cytosol;mitochondrion	GO:0003824;GO:0005515;GO:0008641;GO:0032182;GO:0071566	catalytic activity;protein binding;ubiquitin-like modifier activating enzyme activity;ubiquitin-like protein binding;UFM1 activating enzyme activity
Tb927.4.5200:mRNA-p1	Tb927.4.5200:mRNA-p1	Tb927.4.5200	Nucleoporin NUP62	0.418752	-0.645487	1.14771	-0.673747	0.113099	-0.200912	0.443392	-0.662766	0.0557054	0.114547	3.14739	2.89718	3.03817	2.88043	1.07889	-0.69078	1.15343	-0.959142															+	+	+	+	GO:0005643	nuclear pore	N/A	N/A	N/A	N/A	GO:0005634;GO:0005643;GO:0044613	nuclear pore;nuclear pore central transport channel;nucleus	GO:0017056	structural constituent of nuclear pore
Tb927.6.3790:mRNA-p1	Tb927.6.3790:mRNA-p1	Tb927.6.3790	valosin-containing protein homolog, putative	0.486728	-0.651285	0.884977	-0.924097	0.761537	-0.808945	0.301162	-0.704363	1.92326	1.84898	2.30644	-2.60047	1.16735	-0.688525	0.335694	0.581718	1.16505	-0.813745													+	+					N/A	N/A	GO:0005524;GO:0016887	ATP binding;ATP hydrolysis activity	N/A	N/A	GO:0005634;GO:0005737;GO:0097014	ciliary plasm;cytoplasm;nucleus	GO:0016887	ATP hydrolysis activity
Tb927.8.4390:mRNA-p1	Tb927.8.4390:mRNA-p1	Tb927.8.4390	translation initiation factor eIF-2B subunit beta, putative	0.537264	-0.655174	0.635896	-0.856246	0.0263273	0.0576045	0.616618	-0.987948	0.0288453	0.0968482	0.484498	-0.695044	0.370826	-0.732306	0.58584	-0.891568	0.256421	0.430983																			N/A	N/A	N/A	N/A	GO:0044237	cellular metabolic process	GO:0005737;GO:0005851	cytoplasm;eukaryotic translation initiation factor 2B complex	GO:0003743;GO:0005525	GTP binding;translation initiation factor activity
Tb927.8.1750:mRNA-p1	Tb927.8.1750:mRNA-p1	Tb927.8.1750	Fe-S cluster assembly protein DRE2	0.87324	-0.658719	0.0341666	-0.182571	1.36332	-0.728052	0.401218	-1.27796	2.23042	-2.35994	2.33722	-1.77821	1.80657	-1.07206	1.48113	-1.34307	0.579136	2.17297																			GO:0005737;GO:0005758	cytoplasm;mitochondrial intermembrane space	GO:0046872;GO:0051536;GO:0051537;GO:0051539	2 iron, 2 sulfur cluster binding;4 iron, 4 sulfur cluster binding;iron-sulfur cluster binding;metal ion binding	GO:0016226	iron-sulfur cluster assembly	GO:0005654;GO:0005737;GO:0097014	ciliary plasm;cytoplasm;nucleoplasm	N/A	N/A
Tb927.11.9180:mRNA-p1	Tb927.11.9180:mRNA-p1	Tb927.11.9180	ADP-ribosylation factor GTPase activating protein, putative	0.288299	-0.664407	0.265052	-0.401285	0.704921	-0.859705	1.34686	-1.78931	1.33704	-1.6678	0.768698	-0.932422	0.621706	-0.980209	1.61453	-1.51522	0.295329	0.774213																			N/A	N/A	GO:0005096	GTPase activator activity	N/A	N/A	GO:0005634;GO:0005737;GO:0030133;GO:0097014	ciliary plasm;cytoplasm;nucleus;transport vesicle	GO:0003677;GO:0005096	DNA binding;GTPase activator activity
Tb927.3.1380:mRNA-p1	Tb927.3.1380:mRNA-p1	Tb927.3.1380	ATP synthase subunit beta, mitochondrial	1.03339	-0.66441	1.19665	-1.72798	0.803816	-0.628986	1.25951	-1.03109	2.02105	-1.76519	0.543108	-0.379274	1.38752	-1.21092	2.47268	-1.90134	0.96506	-1.35023																			GO:0045261	proton-transporting ATP synthase complex, catalytic core F(1)	GO:0005524;GO:0016787;GO:0046933;GO:0046961	ATP binding;hydrolase activity;proton-transporting ATP synthase activity, rotational mechanism;proton-transporting ATPase activity, rotational mechanism	GO:0015986;GO:0046034;GO:1902600	ATP metabolic process;ATP synthesis coupled proton transport;proton transmembrane transport	GO:0000275;GO:0005739;GO:0005743;GO:0005753;GO:0020023;GO:0045261	kinetoplast;mitochondrial inner membrane;mitochondrial proton-transporting ATP synthase complex;mitochondrial proton-transporting ATP synthase complex, catalytic sector F(1);mitochondrion;proton-transporting ATP synthase complex, catalytic core F(1)	GO:0005515;GO:0005524;GO:0005525;GO:0046933	ATP binding;GTP binding;protein binding;proton-transporting ATP synthase activity, rotational mechanism
Tb927.3.5460:mRNA-p1	Tb927.3.5460:mRNA-p1	Tb927.3.5460	RNA-binding protein, putative	0.420362	-0.67469	0.38981	0.909621	0.147651	0.416447	0.680656	-1.23591	0.968604	-1.88796	0.461629	-1.25636	0.52766	-0.975995	0.684175	-1.10801	1.11862	-1.54311																			N/A	N/A	GO:0003676;GO:0046872	metal ion binding;nucleic acid binding	N/A	N/A	GO:0005634;GO:0005654	nucleoplasm;nucleus	N/A	N/A
Tb927.10.12710:mRNA-p1	Tb927.10.12710:mRNA-p1	Tb927.10.12710	heat shock protein 110, putative	0.255366	-0.680747	0.1159	-0.489753	0.998832	-1.39452	1.40598	-2.01968	0.595193	-0.912657	1.83209	-3.13338	0.682954	-1.22841	0.21689	-0.431457	0.376149	-0.651515																			N/A	N/A	GO:0005524	ATP binding	N/A	N/A	GO:0005634;GO:0005737;GO:0005829	cytoplasm;cytosol;nucleus	N/A	N/A
Tb927.5.3810:mRNA-p1	Tb927.5.3810:mRNA-p1	Tb927.5.3810	orotidine-5-phosphate decarboxylase/orotate phosphoribosyltransferase, putative	0.542728	-0.681238	0.878422	-1.36737	0.522894	-0.958483	0.541943	-1.00523	0.0101837	0.0462262	0.982935	-2.0159	1.69524	2.95563	0.921194	-1.20624	0.262354	-0.439847																		+	N/A	N/A	GO:0003824;GO:0004588;GO:0004590	catalytic activity;orotate phosphoribosyltransferase activity;orotidine-5'-phosphate decarboxylase activity	GO:0006207;GO:0006221;GO:0009116;GO:0044205	'de novo' pyrimidine nucleobase biosynthetic process;'de novo' UMP biosynthetic process;nucleoside metabolic process;pyrimidine nucleotide biosynthetic process	GO:0005737;GO:0020015;GO:0036064	ciliary basal body;cytoplasm;glycosome	GO:0004588;GO:0004590	orotate phosphoribosyltransferase activity;orotidine-5'-phosphate decarboxylase activity
Tb927.10.2560:mRNA-p1	Tb927.10.2560:mRNA-p1	Tb927.10.2560	mitochondrial malate dehydrogenase	0.957632	-0.683827	0.0377147	-0.148631	1.00559	-0.949534	1.47748	-2.01304	2.25392	3.2555	2.10751	-2.24633	2.64006	4.03897	1.40316	-1.63037	0.984595	-0.896409													+	+				+	N/A	N/A	GO:0003824;GO:0016491;GO:0016615;GO:0016616;GO:0030060	catalytic activity;L-malate dehydrogenase activity;malate dehydrogenase activity;oxidoreductase activity;oxidoreductase activity, acting on the CH-OH group of donors, NAD or NADP as acceptor	GO:0005975;GO:0006099;GO:0006108;GO:0019752;GO:0055114	carbohydrate metabolic process;carboxylic acid metabolic process;malate metabolic process;obsolete oxidation-reduction process;tricarboxylic acid cycle	GO:0005737;GO:0005739;GO:0005743;GO:0020023	cytoplasm;kinetoplast;mitochondrial inner membrane;mitochondrion	GO:0016491;GO:0016615;GO:0030060	L-malate dehydrogenase activity;malate dehydrogenase activity;oxidoreductase activity
Tb927.8.3950:mRNA-p1	Tb927.8.3950:mRNA-p1	Tb927.8.3950	hypothetical protein, conserved	0.509655	-0.684809	2.95223	6.84117	0.594032	0.718686	1.33009	-1.5203	1.6251	-2.33359	0.79207	-1.39462	1.19815	-1.40909	1.49563	-1.84296	1.01847	-0.987906					+	+													N/A	N/A	N/A	N/A	N/A	N/A	GO:0005634;GO:0005643	nuclear pore;nucleus	N/A	N/A
Tb927.11.13260.1-p1;Tb927.11.13260.2-p1	Tb927.11.13260.1-p1;Tb927.11.13260.2-p1	Tb927.11.13260;Tb927.11.13260	hypothetical protein, conserved;hypothetical protein, conserved	0.549151	-0.685408	1.84241	-1.58685	0.298526	-0.347873	0.963562	-0.988358	0.722133	-1.50729	1.0059	-0.916375	0.750559	0.639637	1.27273	-1.08978	1.4996	3.07865																			N/A	N/A	N/A	N/A	N/A	N/A	N/A	N/A	N/A	N/A
Tb927.11.330:mRNA-p1	Tb927.11.330:mRNA-p1	Tb927.11.330	Myosin-like protein 1	0.443917	-0.686846	2.57859	8.84341	2.75259	8.35095	0.416216	-0.994557	1.31237	-2.52881	0.688709	-3.06119	0.577895	-1.0781	0.672736	-1.43962	0.73925	-1.09055					+	+	+	+											N/A	N/A	N/A	N/A	N/A	N/A	GO:0005634;GO:0005643;GO:0005737;GO:0044615	cytoplasm;nuclear pore;nuclear pore nuclear basket;nucleus	N/A	N/A
Tb927.2.4810:mRNA-p1	Tb927.2.4810:mRNA-p1	Tb927.2.4810	Component of motile flagella 5	0.725317	-0.686991	1.8905	-1.782	0.910608	-0.755257	0.833376	-1.35405	0.996283	1.85073	1.23051	-1.57709	1.62044	1.41772	2.02418	-2.02885	1.81953	-1.33226														+					GO:0005840	ribosome	GO:0005515	protein binding	N/A	N/A	GO:0005737;GO:0005930	axoneme;cytoplasm	N/A	N/A
Tb927.6.4740:mRNA-p1	Tb927.6.4740:mRNA-p1	Tb927.6.4740	importin-alpha re-exporter protein, putative	0.732785	-0.693365	0.744847	-0.936948	0.609201	-1.02107	1.18822	-1.90983	0.170939	-0.619902	1.18876	-1.8261	1.31223	-1.71118	0.78106	-0.994959	1.31071	-1.40162																			N/A	N/A	GO:0005515	protein binding	GO:0006886	intracellular protein transport	GO:0005635;GO:0005643;GO:0005829	cytosol;nuclear envelope;nuclear pore	GO:0005049	nuclear export signal receptor activity
Tb927.5.2270:mRNA-p1;REV__Tb927.10.1510:mRNA-p1	Tb927.5.2270:mRNA-p1	Tb927.5.2270	Component of motile flagella 44	0.480708	-0.695204	0.435188	-1.1145	0.219462	-0.367511	1.25696	-1.70273	0.082242	-0.217803	1.02495	1.18135	1.33282	-1.58425	0.210309	0.236725	1.73101	3.72055																+			N/A	N/A	GO:0005515	protein binding	N/A	N/A	GO:0005737;GO:0005930	axoneme;cytoplasm	N/A	N/A
Tb927.10.5840:mRNA-p1	Tb927.10.5840:mRNA-p1	Tb927.10.5840	translation elongation factor 1-beta, putative	0.399932	-0.695682	0.963415	-1.23258	0.0157455	0.0254558	0.983543	-1.218	0.0159004	0.107485	0.443806	-0.573102	0.426841	-0.940983	1.66785	1.53145	2.69847	4.1511		+								+									GO:0005853	eukaryotic translation elongation factor 1 complex	GO:0003746	translation elongation factor activity	GO:0006414	translational elongation	GO:0005737;GO:0005829;GO:0005853	cytoplasm;cytosol;eukaryotic translation elongation factor 1 complex	GO:0003746;GO:0005085	guanyl-nucleotide exchange factor activity;translation elongation factor activity
Tb05.5K5.110:mRNA-p1;Tb927.5.4460:mRNA-p1;Tb11.v5.0866.1-p1	Tb05.5K5.110:mRNA-p1;Tb927.5.4460:mRNA-p1;Tb11.v5.0866.1-p1	Tb05.5K5.110;Tb927.5.4460;Tb11.v5.0866	major vault protein, putative;major vault protein, putative;major vault protein, putative	0.904489	-0.697467	1.55946	-1.78051	0.730695	-0.776926	0.484258	-1.2517	0.518317	1.13142	1.13661	-1.319	0.681304	-0.641098	0.749851	-1.06731	2.7919	4.27308		+																	N/A	N/A	N/A	N/A	N/A	N/A	GO:0005634;GO:0005737;N/A	cytoplasm;N/A;nucleus	N/A	N/A
Tb927.11.13080:mRNA-p1	Tb927.11.13080:mRNA-p1	Tb927.11.13080	hypothetical protein, conserved	0.34352	-0.698561	0.546097	-1.02881	0.533717	-1.00787	0.256554	-0.655262	0.571163	-1.19205	0.658234	-1.25688	0.962191	-1.803	2.80397	4.92596	0.654027	-0.9659									+	+									N/A	N/A	N/A	N/A	N/A	N/A	GO:0005634;GO:0005643	nuclear pore;nucleus	N/A	N/A
Tb927.11.7060:mRNA-p1;Tb927.11.7080:mRNA-p1	Tb927.11.7060:mRNA-p1	Tb927.11.7060	acidocalcisomal pyrophosphatase	0.528425	-0.700022	0.103461	-0.157376	0.172347	-0.242342	0.130054	0.159121	0.58406	-0.998699	1.13983	-1.4131	0.95602	-1.31964	0.199813	-0.312541	0.261503	-0.27002																			GO:0005737	cytoplasm	GO:0000287;GO:0004427	inorganic diphosphatase activity;magnesium ion binding	GO:0006796	phosphate-containing compound metabolic process	GO:0005737;GO:0005829;GO:0016020	cytoplasm;cytosol;membrane	GO:0000287;GO:0004427;GO:0016462	inorganic diphosphatase activity;magnesium ion binding;pyrophosphatase activity
Tb927.11.1750:mRNA-p1	Tb927.11.1750:mRNA-p1	Tb927.11.1750	hypothetical protein, conserved	0.23555	-0.706559	1.6862	-2.49863	0.366381	-0.583168	0.22775	0.509807	1.29783	-1.80507	1.76004	2.66786	0.0893468	0.189746	0.863937	-0.997994	0.196931	-0.666838															+	+			N/A	N/A	N/A	N/A	N/A	N/A	GO:0005737;GO:0005794	cytoplasm;Golgi apparatus	N/A	N/A
Tb927.3.3130:mRNA-p1	Tb927.3.3130:mRNA-p1	Tb927.3.3130	Present in the outer mitochondrial membrane proteome 24	0.669145	-0.707255	0.218864	0.69575	1.88115	3.05082	1.55685	-2.11897	0.218317	0.498	1.87497	-2.95739	0.800698	1.26012	0.291735	-0.468218	0.0471102	0.134392																			N/A	N/A	GO:0005515	protein binding	N/A	N/A	GO:0005739;GO:0005741	mitochondrial outer membrane;mitochondrion	GO:0003729	mRNA binding
Tb927.5.295b:mRNA-p1;Tb11.v5.0214.1-p1	Tb927.5.295b:mRNA-p1;Tb11.v5.0214.1-p1	Tb927.5.295b;Tb11.v5.0214	retrotransposon hot spot (RHS) protein, putative;retrotransposon hotspot (RHS) protein 1	0.53807	-0.710834	0.89426	-1.76516	0.0671532	-0.160764	0.339629	-0.889586	0.118866	0.576008	0.762363	-1.48383	1.60947	3.11817	0.789509	-1.06969	0.465904	-0.666196																		+	N/A	N/A	N/A	N/A	N/A	N/A	GO:0005737;GO:0005739	cytoplasm;mitochondrion	N/A	N/A
Tb927.10.12860:mRNA-p1	Tb927.10.12860:mRNA-p1	Tb927.10.12860	pre-RNA processing PIH1/Nop17, putative	0.332721	-0.71111	0.752884	-0.805919	0.771933	-0.933956	0.378172	-0.509898	0.695036	-0.925401	1.00179	-1.13995	0.806784	-1.0163	0.0537084	-0.0699717	2.43815	5.18487		+																	N/A	N/A	N/A	N/A	N/A	N/A	N/A	N/A	N/A	N/A
Tb927.11.210:mRNA-p1	Tb927.11.210:mRNA-p1	Tb927.11.210	hypothetical protein, conserved	0.444905	-0.71255	1.55108	3.96539	1.59943	3.03101	0.365439	-0.766313	0.211895	0.874888	1.31169	2.22756	0.154288	0.436196	0.104501	-0.154502	0.512546	-0.800114						+										+			N/A	N/A	N/A	N/A	N/A	N/A	GO:0005737;GO:0031981;GO:0097014	ciliary plasm;cytoplasm;nuclear lumen	N/A	N/A
Tb927.11.7280:mRNA-p1;Tb11.v5.0255.1-p1	Tb927.11.7280:mRNA-p1;Tb11.v5.0255.1-p1	Tb927.11.7280;Tb11.v5.0255	DNA-directed RNA polymerase II, subunit 9, putative;DNA-direcetd RNA polymerase II, subunit 9, putative	1.08332	-0.713916	3.21335	2.90506	0.297885	1.02294	1.20435	-1.70014	3.02551	2.70404	3.18125	2.82642	0.00209491	-0.011185	1.70107	-2.05662	3.40095	-1.65441					+	+							+	+	+	+			N/A	N/A	N/A	N/A	GO:0006351;GO:0006379	mRNA cleavage;transcription, DNA-templated	GO:0005634;GO:0005654;GO:0005665;GO:0005737	cytoplasm;nucleoplasm;nucleus;RNA polymerase II, core complex	GO:0003899	DNA-directed 5'-3' RNA polymerase activity
Tb927.10.14000:mRNA-p1	Tb927.10.14000:mRNA-p1	Tb927.10.14000	aconitase	0.65813	-0.717487	1.5184	-2.32414	0.919683	-1.31468	0.340219	-0.566691	0.628445	-0.994767	1.05385	-2.02517	1.0884	-1.44826	2.10643	-2.21437	0.210434	0.800945																			N/A	N/A	GO:0046872;GO:0047780	citrate dehydratase activity;metal ion binding	N/A	N/A	GO:0005737;GO:0005739;GO:0005829;GO:0031981;GO:0097014	ciliary plasm;cytoplasm;cytosol;mitochondrion;nuclear lumen	GO:0003994;GO:0051539	4 iron, 4 sulfur cluster binding;aconitate hydratase activity
Tb927.9.2220:mRNA-p1	Tb927.9.2220:mRNA-p1	Tb927.9.2220	SUMO1/Ulp2, putative	0.890426	-0.718937	0.371163	1.62597	2.1919	2.82481	0.545865	-0.485486	0.569674	-0.512469	1.56216	1.57315	2.49164	3.25103	1.78243	2.27045	0.335833	-0.58194								+		+						+		+	N/A	N/A	GO:0008234	cysteine-type peptidase activity	GO:0006508	proteolysis	GO:0005634;GO:0005643;GO:0005783	endoplasmic reticulum;nuclear pore;nucleus	N/A	N/A
Tb927.6.4550:mRNA-p1	Tb927.6.4550:mRNA-p1	Tb927.6.4550	hypothetical protein, conserved	0.67836	-0.726205	0.762176	-1.56596	0.0239867	-0.036747	0.585221	-1.1889	0.384935	-0.540729	0.723054	-0.981442	0.357547	-0.579014	1.04901	-1.7316	0.340195	-0.349621																			N/A	N/A	N/A	N/A	N/A	N/A	GO:0005737;GO:0030133;GO:0031981;GO:0097014	ciliary plasm;cytoplasm;nuclear lumen;transport vesicle	N/A	N/A
Tb927.1.1120:mRNA-p1	Tb927.1.1120:mRNA-p1	Tb927.1.1120	ribosomal RNA-processing protein 8, putative	0.292247	-0.727511	0.858332	-2.66562	0.738625	-2.24137	0.824251	-2.6526	1.2017	-3.99513	0.847997	-2.58748	0.768723	-2.48219	0.0791038	-0.308632	1.1456	-2.48328																			N/A	N/A	GO:0008168	methyltransferase activity	GO:0006364;GO:0032259	methylation;rRNA processing	GO:0005634;GO:0005654;GO:0005730	nucleolus;nucleoplasm;nucleus	GO:0008168	methyltransferase activity
Tb927.9.1600:mRNA-p1	Tb927.9.1600:mRNA-p1	Tb927.9.1600	hypothetical protein, conserved	0.500131	-0.728255	1.51075	-1.39483	0.175859	-0.178673	0.551295	-0.621488	2.01904	-2.02018	1.15551	-1.44155	0.192779	-0.193641	0.446131	-0.559946	0.691685	1.67984																			N/A	N/A	GO:0004674	protein serine/threonine kinase activity	N/A	N/A	GO:0005737;GO:0005856;GO:0020016;GO:0035869	ciliary pocket;ciliary transition zone;cytoplasm;cytoskeleton	GO:0004674	protein serine/threonine kinase activity
Tb927.7.990:mRNA-p1	Tb927.7.990:mRNA-p1	Tb927.7.990	chaperone protein DnaJ, putative	0.546846	-0.729795	1.03227	-1.92509	0.27511	-0.482166	0.396611	-0.74172	0.128083	0.562355	0.993854	-1.61336	0.411965	1.47224	0.948789	-1.67935	0.142014	-0.221887																			N/A	N/A	N/A	N/A	N/A	N/A	GO:0005739;GO:0005741	mitochondrial outer membrane;mitochondrion	GO:0051082	unfolded protein binding
Tb927.8.7220:mRNA-p1	Tb927.8.7220:mRNA-p1	Tb927.8.7220	tousled-like kinase II	0.664834	-0.730198	0.616344	1.11521	1.00334	1.54777	0.790952	-1.08663	1.83252	-2.59435	0.789812	-1.74062	0.433532	-0.553515	1.49955	-1.68627	0.524001	-0.522448																			N/A	N/A	GO:0004672;GO:0005524	ATP binding;protein kinase activity	GO:0006468	protein phosphorylation	GO:0005634;GO:0005654;GO:0005730	nucleolus;nucleoplasm;nucleus	GO:0004674;GO:0005524	ATP binding;protein serine/threonine kinase activity
Tb927.9.13320:mRNA-p1	Tb927.9.13320:mRNA-p1	Tb927.9.13320	hypothetical protein, conserved	0.747731	-0.730457	0.0887827	0.402165	0.530597	-0.385963	1.0344	-1.38571	1.19071	-1.25906	0.582996	-1.4883	0.505818	-0.398415	1.24363	-0.947266	0.160759	-0.127492																			N/A	N/A	N/A	N/A	N/A	N/A	GO:0005634;GO:0005654	nucleoplasm;nucleus	N/A	N/A
Tb927.11.6330:mRNA-p1	Tb927.11.6330:mRNA-p1	Tb927.11.6330	6-phosphogluconolactonase	1.11105	-0.733807	2.07256	-1.82127	0.749065	-0.945892	0.00236754	-0.00198301	1.19969	-1.06154	1.75833	-1.31403	0.903773	-0.512405	0.224104	-0.465448	0.340672	0.820798																			N/A	N/A	GO:0017057	6-phosphogluconolactonase activity	GO:0005975;GO:0006098	carbohydrate metabolic process;pentose-phosphate shunt	GO:0005737;GO:0020015;GO:0097014	ciliary plasm;cytoplasm;glycosome	GO:0017057	6-phosphogluconolactonase activity
Tb927.10.4040:mRNA-p1	Tb927.10.4040:mRNA-p1	Tb927.10.4040	3-keto-dihydrosphingosine reductase	0.876097	-0.734083	0.736274	-0.742909	0.17354	-0.180841	0.956131	-1.1776	1.33232	-1.6464	1.75262	1.48807	0.590631	-0.63375	0.999052	-0.790347	0.811307	-0.70844															+	+			N/A	N/A	N/A	N/A	GO:0055114	obsolete oxidation-reduction process	GO:0005635;GO:0005783;GO:0005789	endoplasmic reticulum;endoplasmic reticulum membrane;nuclear envelope	GO:0047560	3-dehydrosphinganine reductase activity
Tb927.10.13780:mRNA-p1;Tb11.v5.0718.1-p1	Tb927.10.13780:mRNA-p1;Tb11.v5.0718.1-p1	Tb927.10.13780;Tb11.v5.0718	protein kinase, putative;Glycogen synthase kinase 3 short	0.306848	-0.734303	0.0974244	-0.331131	0.289384	-0.88783	0.100882	0.341362	0.280368	-0.874337	0.00362869	0.0136712	0.209306	0.711976	0.286959	-0.690702	0.193768	-0.49322																			N/A	N/A	GO:0004672;GO:0005524	ATP binding;protein kinase activity	GO:0006468	protein phosphorylation	GO:0005634;GO:0005737;GO:0005929;GO:0005930;GO:0020023;GO:0031981;GO:0036064;GO:0097014;GO:0097542	axoneme;ciliary basal body;ciliary plasm;ciliary tip;cilium;cytoplasm;kinetoplast;nuclear lumen;nucleus	GO:0004674;GO:0005524;GO:0050321	ATP binding;protein serine/threonine kinase activity;tau-protein kinase activity
Tb927.11.3740:mRNA-p1	Tb927.11.3740:mRNA-p1	Tb927.11.3740	proteasome regulatory ATPase subunit 2	0.892784	-0.737465	1.06453	-1.68174	0.78036	-0.525062	0.80773	-1.62744	0.0716131	-0.3134	2.0045	-2.30987	0.0432682	-0.126808	0.307754	-0.501926	0.920601	-0.853022																			GO:0005737	cytoplasm	GO:0005524;GO:0016787;GO:0016887	ATP binding;ATP hydrolysis activity;hydrolase activity	GO:0030163	protein catabolic process	GO:0005654;GO:0005737;GO:0005838;GO:0008540	cytoplasm;nucleoplasm;proteasome regulatory particle;proteasome regulatory particle, base subcomplex	GO:0016887;GO:0017025;GO:0036402	ATP hydrolysis activity;proteasome-activating activity;TBP-class protein binding
Tb927.5.4420:mRNA-p1;Tb05.5K5.70:mRNA-p1	Tb927.5.4420:mRNA-p1;Tb05.5K5.70:mRNA-p1	Tb927.5.4420;Tb05.5K5.70	nucleolar RNA helicase II, putative;nucleolar RNA helicase II, putative	0.792378	-0.740869	1.49474	-1.06671	1.7308	-1.43833	1.63542	-1.70713	1.81898	-1.94326	0.560953	-1.0392	1.14943	-0.827619	2.78532	-2.05241	0.409929	-0.427247																			N/A	N/A	GO:0003676;GO:0003723;GO:0004386;GO:0005524	ATP binding;helicase activity;nucleic acid binding;RNA binding	N/A	N/A	GO:0005634;GO:0005654;GO:0005730	nucleolus;nucleoplasm;nucleus	GO:0003723;GO:0003724;GO:0003729;GO:0004386;GO:0005524	ATP binding;helicase activity;mRNA binding;RNA binding;RNA helicase activity
Tb927.9.12320:mRNA-p1	Tb927.9.12320:mRNA-p1	Tb927.9.12320	cystathione gamma lyase, putative	0.805185	-0.74644	0.194925	-0.677116	0.762039	-0.726318	0.53734	-0.474778	0.00989455	0.0368315	0.70553	-0.629699	1.39563	-0.764295	1.89597	-0.894452	1.61197	-0.784246																			N/A	N/A	GO:0003824;GO:0030170	catalytic activity;pyridoxal phosphate binding	GO:0019346	transsulfuration	GO:0005737;GO:0097014	ciliary plasm;cytoplasm	GO:0004123	cystathionine gamma-lyase activity
Tb927.9.8130:mRNA-p1;Tb927.9.8100:mRNA-p1	Tb927.9.8130:mRNA-p1;Tb927.9.8100:mRNA-p1	Tb927.9.8130;Tb927.9.8100	nascent polypeptide associated complex subunit, putative;nascent polypeptide associated complex subunit, putative	0.385214	-0.748337	0.00533838	0.026652	0.0436862	-0.126112	0.633904	-1.23538	0.522106	0.98721	0.234691	-0.579123	0.127418	-0.296134	0.724373	-0.976353	0.495751	1.97228																			GO:0005854	nascent polypeptide-associated complex	N/A	N/A	N/A	N/A	GO:0005737;GO:0005854	cytoplasm;nascent polypeptide-associated complex	GO:0003713;GO:0051082	transcription coactivator activity;unfolded protein binding
Tb927.3.3490:mRNA-p1	Tb927.3.3490:mRNA-p1	Tb927.3.3490	High mobility group protein TDP1	0.263886	-0.750019	0.262236	-0.755471	1.10043	-0.95658	0.395743	-0.651642	1.47877	-1.8912	1.39885	-1.28129	1.27559	-1.51516	1.62697	-1.48286	0.65595	-1.11303																			N/A	N/A	N/A	N/A	N/A	N/A	GO:0005634;GO:0005654;GO:0005730;GO:0031981	nuclear lumen;nucleolus;nucleoplasm;nucleus	GO:0000182;GO:0000402;GO:0003677;GO:0005515;GO:0008301;GO:0042301	crossed form four-way junction DNA binding;DNA binding;DNA binding, bending;phosphate ion binding;protein binding;rDNA binding
Tb927.5.3800:mRNA-p1	Tb927.5.3800:mRNA-p1	Tb927.5.3800	glutamine hydrolysing (not ammonia-dependent) carbomoyl phosphate synthase, putative	1.38055	-0.752197	0.980449	-1.05069	0.594917	-0.685897	0.925115	-1.25902	0.708062	-1.17481	1.91256	-2.57911	0.410196	0.336745	1.18533	-1.08565	0.114473	-0.2217																			N/A	N/A	GO:0004055;GO:0004088;GO:0005524;GO:0046872	argininosuccinate synthase activity;ATP binding;carbamoyl-phosphate synthase (glutamine-hydrolyzing) activity;metal ion binding	GO:0006207;GO:0006526;GO:0006541;GO:0006807	arginine biosynthetic process;'de novo' pyrimidine nucleobase biosynthetic process;glutamine metabolic process;nitrogen compound metabolic process	GO:0005737	cytoplasm	N/A	N/A
Tb11.02.5360b.1-p1;Tb11.02.5360:mRNA-p1	Tb11.02.5360b.1-p1;Tb11.02.5360:mRNA-p1	Tb11.02.5360b;Tb11.02.5360	hypothetical protein, conserved;hypothetical protein, conserved	0.309741	-0.752698	0.704599	-1.61056	0.0551262	-0.16995	0.865425	-2.00243	0.925199	-2.28657	1.43617	3.51662	0.304016	-0.753879	0.715266	-1.44308	0.510663	-0.947622																+			GO:0016021	integral component of membrane	N/A	N/A	N/A	N/A	N/A	N/A	N/A	N/A
Tb927.9.7770:mRNA-p1	Tb927.9.7770:mRNA-p1	Tb927.9.7770	spermidine synthase	1.52705	-0.757635	0.116771	0.487269	0.781646	-1.05993	1.57268	-1.01419	2.00717	-1.92315	1.85914	-1.37215	0.687251	-0.898227	2.17659	-1.59552	9.08e-05	0.000322978																			N/A	N/A	GO:0003824	catalytic activity	N/A	N/A	GO:0005737;GO:0031981;GO:0097014	ciliary plasm;cytoplasm;nuclear lumen	GO:0004766	spermidine synthase activity
Tb927.11.6440:mRNA-p1	Tb927.11.6440:mRNA-p1	Tb927.11.6440	Essential Nuclear Factor, 49 kDa	0.378258	-0.758844	0.527599	-0.932002	0.838836	-1.51904	0.806072	-1.46862	0.197023	-0.743257	0.647784	-1.13802	0.14101	-0.283204	1.35417	-1.8307	2.04531	4.42214																			N/A	N/A	N/A	N/A	N/A	N/A	GO:0005634;GO:0005737	cytoplasm;nucleus	GO:0003677;GO:0003729	DNA binding;mRNA binding
Tb927.10.10590:mRNA-p1;Tb927.10.10580:mRNA-p1;Tb927.10.10570:mRNA-p1;Tb927.10.10560:mRNA-p1;Tb927.10.10550:mRNA-p1;Tb927.10.10540:mRNA-p1;Tb927.10.10530:mRNA-p1;Tb927.10.10520:mRNA-p1;Tb927.10.10515:mRNA-p1;Tb927.10.10510:mRNA-p1;Tb927.10.10500:mRNA-p1;Tb927.10.10490:mRNA-p1;Tb927.10.10480:mRNA-p1;Tb927.10.10470:mRNA-p1;Tb927.10.10460:mRNA-p1;Tb927.10.10445:mRNA-p1	Tb927.10.10590:mRNA-p1;Tb927.10.10580:mRNA-p1;Tb927.10.10570:mRNA-p1;Tb927.10.10560:mRNA-p1;Tb927.10.10550:mRNA-p1;Tb927.10.10540:mRNA-p1;Tb927.10.10530:mRNA-p1;Tb927.10.10520:mRNA-p1;Tb927.10.10515:mRNA-p1;Tb927.10.10510:mRNA-p1;Tb927.10.10500:mRNA-p1;Tb927.10.10490:mRNA-p1;Tb927.10.10480:mRNA-p1;Tb927.10.10470:mRNA-p1;Tb927.10.10460:mRNA-p1;Tb927.10.10445:mRNA-p1	Tb927.10.10590;Tb927.10.10580;Tb927.10.10570;Tb927.10.10560;Tb927.10.10550;Tb927.10.10540;Tb927.10.10530;Tb927.10.10520;Tb927.10.10515;Tb927.10.10510;Tb927.10.10500;Tb927.10.10490;Tb927.10.10480;Tb927.10.10470;Tb927.10.10460;Tb927.10.10445	Core histone H2A/H2B/H3/H4, putative;histone H2B, putative;histone H2B, putative;histone H2B, putative;histone H2B, putative;histone H2B, putative;histone H2B, putative;unspecified product;histone H2B, putative;histone H2B, putative;histone H2B, putative;histone H2B, putative;histone H2B, putative;histone H2B, putative;histone H2B, putative;histone H2B, putative	0.765583	-0.759808	1.52141	3.16628	2.56644	3.59761	2.86906	3.84109	0.00203189	-0.0101169	0.213015	1.08424	0.385239	1.11471	1.15575	-1.61602	0.813067	-1.01973						+		+			+	+							GO:0000786	nucleosome	GO:0003677;GO:0046982	DNA binding;protein heterodimerization activity	N/A	N/A	GO:0005634;GO:0005654;N/A	N/A;nucleoplasm;nucleus	GO:0003677;GO:0042301;N/A	DNA binding;N/A;phosphate ion binding
Tb927.9.15330:mRNA-p1	Tb927.9.15330:mRNA-p1	Tb927.9.15330	U3 small nucleolar RNA-associated protein 6, putative	0.504569	-0.763622	0.146471	0.705599	0.399597	0.827484	0.367612	-0.422823	0.713159	-1.04418	0.207504	-0.345444	0.646784	-0.744865	0.606623	-0.723679	0.291611	-0.401396																			N/A	N/A	GO:0030515	snoRNA binding	GO:0000462	maturation of SSU-rRNA from tricistronic rRNA transcript (SSU-rRNA, 5.8S rRNA, LSU-rRNA)	GO:0005634;GO:0005654;GO:0005730;GO:0005737;GO:0032040;GO:0034388	cytoplasm;nucleolus;nucleoplasm;nucleus;Pwp2p-containing subcomplex of 90S preribosome;small-subunit processome	GO:0030515	snoRNA binding
Tb927.10.3100:mRNA-p1	Tb927.10.3100:mRNA-p1	Tb927.10.3100	glycerol-3-phosphate acyltransferase, putative	1.05503	-0.764126	1.02358	-1.6319	0.150396	-0.186701	0.830829	-0.924452	1.3521	-1.42283	2.84444	3.78575	1.47822	-1.50997	1.78471	1.40231	1.3046	-1.1403										+					+	+			N/A	N/A	GO:0016746	acyltransferase activity	N/A	N/A	GO:0005737;GO:0030176	cytoplasm;integral component of endoplasmic reticulum membrane	GO:0004366;GO:0016287;GO:0043772	acyl-phosphate glycerol-3-phosphate acyltransferase activity;glycerol-3-phosphate O-acyltransferase activity;glycerone-phosphate O-acyltransferase activity
Tb927.3.3300:mRNA-p1	Tb927.3.3300:mRNA-p1	Tb927.3.3300	Flagellum attachment zone protein 19	0.458683	-0.772498	1.52916	-3.73288	1.22266	-2.74997	1.31499	-3.02266	1.50613	-3.71875	1.37915	-3.88387	1.52088	-3.63893	0.365075	-0.678702	1.29984	-2.47121																			N/A	N/A	N/A	N/A	N/A	N/A	GO:0005929;GO:0032991;GO:0120119	cilium;flagellum attachment zone;protein-containing complex	N/A	N/A
Tb927.11.6510:mRNA-p1;Tb927.11.6500:mRNA-p1	Tb927.11.6510:mRNA-p1;Tb927.11.6500:mRNA-p1	Tb927.11.6510;Tb927.11.6500	40S ribosomal protein S21, putative;40S ribosomal protein S21, putative	1.52657	-0.775062	0.140103	-0.510607	1.21844	-0.767385	1.61136	-1.13857	0.0132276	0.0845435	0.0991541	0.562638	3.65129	3.87094	2.7331	-1.42103	2.16542	-1.7461																	+	+	GO:0005840	ribosome	GO:0003735	structural constituent of ribosome	GO:0006412	translation	GO:0005737;GO:0005840;GO:0022627	cytoplasm;cytosolic small ribosomal subunit;ribosome	GO:0003735	structural constituent of ribosome
Tb927.10.1520:mRNA-p1	Tb927.10.1520:mRNA-p1	Tb927.10.1520	ras-related protein Rab21, putative	0.984803	-0.777992	1.52087	-1.56375	0.453728	-0.456837	1.27984	-1.99009	2.006	-2.68796	2.05739	3.64042	0.243267	-0.267265	1.20794	-1.76911	0.543763	-0.568875															+	+			N/A	N/A	GO:0003924;GO:0005525	GTP binding;GTPase activity	GO:0032482	Rab protein signal transduction	GO:0005769;GO:0012505;GO:0030133	early endosome;endomembrane system;transport vesicle	GO:0003924	GTPase activity
Tb927.9.4210:mRNA-p1;Tb11.v5.0561.1-p1	Tb927.9.4210:mRNA-p1;Tb11.v5.0561.1-p1	Tb927.9.4210;Tb11.v5.0561	fatty acyl CoA synthetase, putative;fatty acyl CoA synthetase 3	0.644637	-0.785809	0.723493	-1.03443	1.40427	-1.61931	0.465403	-0.758018	0.330384	-0.87448	2.03571	-3.10113	1.15842	-1.2831	1.5815	-1.90752	1.36479	-1.52796																			N/A	N/A	GO:0102391;N/A	decanoate-CoA ligase activity;N/A	N/A	N/A	GO:0005654;GO:0005737;GO:0005783;GO:0016020;GO:0097014;N/A	ciliary plasm;cytoplasm;endoplasmic reticulum;membrane;N/A;nucleoplasm	GO:0004321;GO:0004467;N/A	fatty-acyl-CoA synthase activity;long-chain fatty acid-CoA ligase activity;N/A
Tb927.10.2900:mRNA-p1;Tb11.v5.0837.1-p1	Tb927.10.2900:mRNA-p1;Tb11.v5.0837.1-p1	Tb927.10.2900;Tb11.v5.0837	importin beta-1 subunit, putative;importin beta-1 subunit, putative	0.631079	-0.785926	1.12804	-1.75444	1.25483	-2.04995	0.767081	-2.11736	0.371966	-1.34855	0.997225	-1.6657	0.872878	-1.44197	1.48784	-1.5985	1.30926	-1.67992																			N/A	N/A	N/A	N/A	GO:0006606;GO:0006886	intracellular protein transport;protein import into nucleus	GO:0005634;GO:0005643;GO:0005654;GO:0005737;N/A	cytoplasm;N/A;nuclear pore;nucleoplasm;nucleus	GO:0008139;GO:0008565;GO:0061608;N/A	N/A;nuclear import signal receptor activity;nuclear localization sequence binding;obsolete protein transporter activity
Tb927.6.1920:mRNA-p1	Tb927.6.1920:mRNA-p1	Tb927.6.1920	hypothetical protein, conserved	0.385861	-0.787353	1.26011	3.24695	1.02061	2.75699	0.307465	-1.01919	0.341657	-0.961234	0.897006	2.1477	0.101582	0.382632	0.540161	-1.00974	0.399496	-0.816914						+										+			N/A	N/A	N/A	N/A	N/A	N/A	GO:0005634	nucleus	N/A	N/A
Tb927.7.2770:mRNA-p1	Tb927.7.2770:mRNA-p1	Tb927.7.2770	hypothetical protein, conserved	1.00659	-0.803784	1.41683	1.7803	0.488741	0.803085	0.482808	-0.559491	1.4428	-1.57117	2.17568	2.0362	1.71698	-1.3924	1.39473	-1.27251	0.655806	-0.555637						+									+	+			N/A	N/A	N/A	N/A	N/A	N/A	GO:0005634	nucleus	N/A	N/A
Tb927.3.3850:mRNA-p1	Tb927.3.3850:mRNA-p1	Tb927.3.3850	COPII coat assembly protein sec16	0.497455	-0.80887	0.691631	-1.3457	0.137033	0.31331	0.141627	-0.461408	0.199078	-0.455604	0.657231	-1.30085	0.069324	0.233055	0.27458	-0.488699	0.354153	1.03987																			GO:0000139	Golgi membrane	N/A	N/A	GO:0006914;GO:0048208	autophagy;COPII vesicle coating	GO:0005794;GO:0012507;GO:0070971	endoplasmic reticulum exit site;ER to Golgi transport vesicle membrane;Golgi apparatus	N/A	N/A
Tb927.7.730:mRNA-p1	Tb927.7.730:mRNA-p1	Tb927.7.730	Component of motile flagella 49	0.477769	-0.812093	0.737725	-1.61961	0.336336	-0.903159	0.602739	-1.3713	0.361816	-0.866584	0.440421	-1.00875	0.218188	-0.687975	0.308351	-0.636718	0.62274	2.01052																			N/A	N/A	GO:0005515	protein binding	N/A	N/A	GO:0005737;GO:0030133	cytoplasm;transport vesicle	GO:0019901	protein kinase binding
Tb927.10.8980:mRNA-p1	Tb927.10.8980:mRNA-p1	Tb927.10.8980	hypothetical protein, conserved	0.599263	-0.814923	1.16042	-1.12348	1.68924	-1.75854	1.66495	-1.84877	1.55303	-1.84888	1.27595	-1.39248	1.10561	-1.54395	0.0441889	-0.180978	0.481192	-0.588338																			N/A	N/A	N/A	N/A	N/A	N/A	GO:0005654;GO:0005730;GO:0005737;GO:0005739;GO:0020023	cytoplasm;kinetoplast;mitochondrion;nucleolus;nucleoplasm	N/A	N/A
Tb927.10.1170:mRNA-p1;Tb11.0560:mRNA-p1;Tb11.v5.0858.1-p1	Tb927.10.1170:mRNA-p1;Tb11.0560:mRNA-p1	Tb927.10.1170;Tb11.0560	hypothetical protein, conserved;intraflagellar transport protein 172	0.825042	-0.815099	0.235033	0.861481	0.6956	-0.755726	0.545794	-1.02238	0.270887	-0.893991	1.88839	-1.89923	0.637097	-0.664229	0.934616	-1.11797	1.20561	-1.02881																			N/A	N/A	GO:0005515	protein binding	N/A	N/A	GO:0005930;GO:0030990;GO:0030992;GO:0031514;GO:0036064;N/A	axoneme;ciliary basal body;intraciliary transport particle;intraciliary transport particle B;motile cilium;N/A	N/A	N/A
Tb927.11.2410:mRNA-p1	Tb927.11.2410:mRNA-p1	Tb927.11.2410	Flabarin, putative	0.919534	-0.815952	0.236362	-0.535114	0.997154	-1.10263	1.29779	-1.4775	0.182848	-0.517461	1.60224	-2.09191	0.853336	-0.925646	1.74991	-1.87452	0.029511	0.0984402																			N/A	N/A	N/A	N/A	N/A	N/A	GO:0005737;GO:0005886;GO:0005929;GO:0020016;GO:0030133;GO:0031981;GO:0060170;GO:0120267	ciliary membrane;ciliary pocket;cilium;cytoplasm;nuclear lumen;pellicular membrane;plasma membrane;transport vesicle	N/A	N/A
Tb927.11.740:mRNA-p1	Tb927.11.740:mRNA-p1	Tb927.11.740	eukaryotic translation initiation factor 5A	0.903054	-0.816205	0.0508185	0.176194	0.909523	-0.639381	0.778186	-2.10552	1.4699	-1.47652	1.01692	-1.52864	0.21172	-0.183523	0.424077	-0.589498	0.393039	1.22243																			N/A	N/A	GO:0003723;GO:0003746;GO:0043022	ribosome binding;RNA binding;translation elongation factor activity	GO:0045901;GO:0045905	positive regulation of translational elongation;positive regulation of translational termination	GO:0005737;GO:0005844	cytoplasm;polysome	GO:0003743;GO:0003746	translation elongation factor activity;translation initiation factor activity
Tb927.9.13740:mRNA-p1;Tb927.9.13710:mRNA-p1;Tb927.9.13680:mRNA-p1;Tb927.9.13655:mRNA-p1;Tb927.9.13650:mRNA-p1	Tb927.9.13740:mRNA-p1;Tb927.9.13710:mRNA-p1;Tb927.9.13680:mRNA-p1;Tb927.9.13655:mRNA-p1;Tb927.9.13650:mRNA-p1	Tb927.9.13740;Tb927.9.13710;Tb927.9.13680;Tb927.9.13655;Tb927.9.13650	ADP-ribosylation factor, putative;ADP-ribosylation factor, putative;ADP-ribosylation factor, putative;ADP-ribosylation factor, putative;ADP-ribosylation factor, putative	0.96329	-0.816369	0.0656504	0.259502	1.34486	-1.18309	0.771368	-1.22006	0.142004	-0.603192	0.107888	-0.445792	1.44015	-2.20731	1.56749	-2.15326	1.22879	-0.749203																			N/A	N/A	GO:0005525	GTP binding	N/A	N/A	GO:0005737;GO:0020016;GO:0030133;GO:0031981;GO:0097014	ciliary plasm;ciliary pocket;cytoplasm;nuclear lumen;transport vesicle	GO:0005525;GO:0044877	GTP binding;protein-containing complex binding
Tb927.8.6330:mRNA-p1	Tb927.8.6330:mRNA-p1	Tb927.8.6330	WD domain, G-beta repeat/PFU (PLAA family ubiquitin binding), putative	0.664331	-0.821768	0.288712	-0.393513	0.740684	-0.923409	0.217231	-0.459508	0.222919	-0.336048	1.03269	-1.49212	0.268971	-0.425065	0.78555	-1.09257	0.768763	-0.769919																			N/A	N/A	GO:0005515	protein binding	N/A	N/A	GO:0005634;GO:0005654;GO:0005737	cytoplasm;nucleoplasm;nucleus	GO:0043130	ubiquitin binding
Tb927.2.4580:mRNA-p1	Tb927.2.4580:mRNA-p1	Tb927.2.4580	UNC119	0.800114	-0.822177	0.588113	-0.804684	2.28342	4.80314	0.949582	-1.51128	2.21762	5.28615	0.0564969	-0.0915051	2.37347	4.76233	0.8783	-0.863162	0.392893	-0.534709								+					+	+				+	N/A	N/A	N/A	N/A	N/A	N/A	GO:0005737;GO:0005929;GO:0031981;GO:0097014	ciliary plasm;cilium;cytoplasm;nuclear lumen	GO:0008289	lipid binding
Tb927.3.5340:mRNA-p1	Tb927.3.5340:mRNA-p1	Tb927.3.5340	Hsc70-interacting protein (Hip), putative	0.459717	-0.824035	0.155026	-0.385155	0.311745	-0.741748	0.578359	-1.35486	0.952452	2.04591	0.942607	-2.05406	0.173071	-0.490064	0.378897	-0.657499	1.01416	2.0597														+					N/A	N/A	GO:0005515	protein binding	N/A	N/A	GO:0005737	cytoplasm	GO:0031072	heat shock protein binding
Tb927.11.5520:mRNA-p1	Tb927.11.5520:mRNA-p1	Tb927.11.5520	triosephosphate isomerase	0.415238	-0.827211	0.0398974	-0.162918	0.549475	-1.28994	0.377701	-1.08916	0.555377	-1.37752	0.919076	-2.11043	0.663161	-1.5314	0.62978	-1.05709	0.638754	-1.31306																			N/A	N/A	GO:0003824;GO:0004807	catalytic activity;triose-phosphate isomerase activity	GO:0006096	glycolytic process	GO:0005737;GO:0005829;GO:0020015	cytoplasm;cytosol;glycosome	GO:0004807	triose-phosphate isomerase activity
Tb927.10.1550:mRNA-p1	Tb927.10.1550:mRNA-p1	Tb927.10.1550	proteasome regulatory non-ATP-ase subunit 5	0.625863	-0.829833	0.76944	-0.789926	0.639499	-0.66834	1.21835	-1.77292	0.158925	0.220755	0.551376	-1.50863	0.580847	-1.54562	1.60828	-1.77244	1.35291	-1.29158																			N/A	N/A	N/A	N/A	N/A	N/A	GO:0005654;GO:0005737;GO:0005838;GO:0008541;GO:0031595	cytoplasm;nuclear proteasome complex;nucleoplasm;proteasome regulatory particle;proteasome regulatory particle, lid subcomplex	GO:0004175	endopeptidase activity
Tb927.7.1690:mRNA-p1	Tb927.7.1690:mRNA-p1	Tb927.7.1690	Silent information regulator 2 related protein 1	0.815169	-0.834945	0.0620032	0.162571	0.49145	-0.658336	0.823293	-1.14018	0.413733	1.65242	0.67331	-1.07234	0.859281	-1.07467	1.18126	-1.16182	0.142205	-0.151547																			GO:0000781	chromosome, telomeric region	GO:0008270;GO:0017136;GO:0070403	NAD+ binding;NAD-dependent histone deacetylase activity;zinc ion binding	N/A	N/A	GO:0005634;GO:0005737;GO:0005829;GO:0031981;GO:0097014	ciliary plasm;cytoplasm;cytosol;nuclear lumen;nucleus	GO:0003950;GO:0003956;GO:0004407;GO:0017136;GO:0070403	histone deacetylase activity;NAD(P)+-protein-arginine ADP-ribosyltransferase activity;NAD+ ADP-ribosyltransferase activity;NAD+ binding;NAD-dependent histone deacetylase activity
Tb927.11.13200:mRNA-p1	Tb927.11.13200:mRNA-p1	Tb927.11.13200	LEM3 (ligand-effect modulator 3) family / CDC50 family, putative	0.826441	-0.838622	0.925433	-1.01389	0.842344	-0.943013	0.439007	-0.595927	0.961442	-1.67489	2.2485	3.38412	0.505777	-0.572063	0.653784	-0.902235	1.56576	-1.37766															+	+			GO:0016020;GO:0016021	integral component of membrane;membrane	N/A	N/A	N/A	N/A	GO:0005737;GO:0005783;GO:0005794;GO:0005886;GO:0031981;GO:0097014	ciliary plasm;cytoplasm;endoplasmic reticulum;Golgi apparatus;nuclear lumen;plasma membrane	N/A	N/A
Tb927.2.4850:mRNA-p1	Tb927.2.4850:mRNA-p1	Tb927.2.4850	Phosducin, putative	0.758989	-0.839494	0.1276	0.338466	0.368796	-0.541374	0.613044	-0.852439	0.775778	-1.40936	0.0972213	-0.371429	0.869176	-1.2963	0.559923	0.824341	1.92864	3.24875																			N/A	N/A	N/A	N/A	N/A	N/A	GO:0005737;GO:0097014	ciliary plasm;cytoplasm	N/A	N/A
Tb927.11.8200:mRNA-p1	Tb927.11.8200:mRNA-p1	Tb927.11.8200	ribosomal protein S26, putative	0.55368	-0.839755	1.18874	-3.95676	2.0682	-5.0609	2.2642	-6.25536	0.821814	-3.09517	0.981467	-5.38269	1.13877	-3.92612	0.0583202	0.161705	0.959584	-2.77289																			GO:0005840	ribosome	GO:0003735	structural constituent of ribosome	GO:0006412	translation	GO:0005840;GO:0022627	cytosolic small ribosomal subunit;ribosome	GO:0003729;GO:0003735	mRNA binding;structural constituent of ribosome
Tb927.10.7410:mRNA-p1	Tb927.10.7410:mRNA-p1	Tb927.10.7410	succinyl-CoA ligase [GDP-forming] beta-chain, putative	0.548	-0.840443	0.480854	-1.01512	0.110384	0.20571	0.425301	-0.631598	1.76745	3.13887	0.366728	-0.683584	2.17486	4.07261	0.301601	-0.526171	0.439207	-0.558378													+	+				+	N/A	N/A	GO:0003824;GO:0005524	ATP binding;catalytic activity	GO:0006099	tricarboxylic acid cycle	GO:0005739	mitochondrion	N/A	N/A
Tb927.5.3240:mRNA-p1	Tb927.5.3240:mRNA-p1	Tb927.5.3240	hypothetical protein, conserved	0.479975	-0.843389	1.0263	-1.14531	0.822473	1.21814	0.936324	-1.19423	1.15975	-2.15975	1.65747	-2.21104	1.18965	-1.45937	2.03543	-2.20989	1.16613	-1.55624																			N/A	N/A	N/A	N/A	N/A	N/A	GO:0005634;GO:0005654	nucleoplasm;nucleus	N/A	N/A
Tb927.9.2730:mRNA-p1	Tb927.9.2730:mRNA-p1	Tb927.9.2730	hypothetical protein, conserved	1.2074	-0.844224	1.91045	-1.37907	0.89607	-0.444319	1.73327	-1.18542	3.40442	-2.52817	1.36733	-1.44492	1.17773	-1.35759	2.58549	-1.12377	0.6848	2.45605																			N/A	N/A	N/A	N/A	N/A	N/A	GO:0005737;GO:0030133	cytoplasm;transport vesicle	N/A	N/A
Tb927.4.3540:mRNA-p1	Tb927.4.3540:mRNA-p1	Tb927.4.3540	hypothetical protein, conserved	0.855878	-0.844594	0.405042	1.25445	0.0860891	0.254189	0.906163	-1.78425	2.17341	-2.11558	0.684748	-1.05726	2.02936	-2.06633	1.54139	-1.4759	1.62013	-1.55409																			N/A	N/A	N/A	N/A	N/A	N/A	GO:0005634;GO:0005654;GO:0005737	cytoplasm;nucleoplasm;nucleus	N/A	N/A
Tb927.8.2630:mRNA-p1	Tb927.8.2630:mRNA-p1	Tb927.8.2630	kinesin-C	0.333474	-0.844716	0.348244	-0.876373	0.549916	-1.15783	0.195597	-0.592141	0.0359007	-0.0973342	0.554041	-1.17853	0.719269	-1.42689	0.370946	-0.66478	0.284653	-0.576357																			N/A	N/A	GO:0003777;GO:0005524;GO:0008017	ATP binding;microtubule binding;microtubule motor activity	GO:0007018	microtubule-based movement	GO:0005871;GO:0005874;GO:0005875;GO:0030863;GO:0051286	cell tip;cortical cytoskeleton;kinesin complex;microtubule;microtubule associated complex	GO:0003774;GO:0003777;GO:0005515;GO:0005524;GO:0008017;GO:0016887	ATP binding;ATP hydrolysis activity;cytoskeletal motor activity;microtubule binding;microtubule motor activity;protein binding
Tb927.9.10920:mRNA-p1	Tb927.9.10920:mRNA-p1	Tb927.9.10920	kinetoplastid kinetochore protein 3	0.603865	-0.845387	0.555028	-0.966428	0.0325937	0.0685272	1.0629	-0.826901	2.80087	-1.8493	2.68682	-1.72807	1.96431	-1.10208	1.40707	-1.87641	0.775558	-1.12958																			N/A	N/A	GO:0004672;GO:0005524	ATP binding;protein kinase activity	GO:0006468	protein phosphorylation	GO:0000776;GO:0005634	kinetochore;nucleus	GO:0004674;GO:0005524	ATP binding;protein serine/threonine kinase activity
Tb927.11.2650:mRNA-p1	Tb927.11.2650:mRNA-p1	Tb927.11.2650	heat shock protein 84, putative	0.642837	-0.847871	0.546033	-0.938475	0.459084	-0.743406	0.509132	-0.841191	1.41637	2.30194	0.517606	-0.806778	1.4945	2.37661	0.873426	-0.944247	0.491528	-0.60759														+					N/A	N/A	GO:0005524;GO:0051082	ATP binding;unfolded protein binding	GO:0006457	protein folding	GO:0005739;GO:0005743;GO:0020023	kinetoplast;mitochondrial inner membrane;mitochondrion	GO:0016887;GO:0019901;GO:0051082	ATP hydrolysis activity;protein kinase binding;unfolded protein binding
Tb927.1.2550:mRNA-p1;Tb927.1.2530:mRNA-p1;Tb927.1.2510:mRNA-p1;Tb927.1.2490:mRNA-p1;Tb927.1.2470:mRNA-p1;Tb927.1.2450:mRNA-p1;Tb927.1.2430:mRNA-p1;Tb927.10.15350:mRNA-p1	Tb927.1.2550:mRNA-p1;Tb927.1.2530:mRNA-p1;Tb927.1.2510:mRNA-p1;Tb927.1.2490:mRNA-p1;Tb927.1.2470:mRNA-p1;Tb927.1.2450:mRNA-p1;Tb927.1.2430:mRNA-p1	Tb927.1.2550;Tb927.1.2530;Tb927.1.2510;Tb927.1.2490;Tb927.1.2470;Tb927.1.2450;Tb927.1.2430	histone H3, putative;histone H3, putative;histone H3, putative;histone H3, putative;histone H3, putative;histone H3, putative;histone H3, putative	0.850256	-0.850741	0.251914	1.44784	0.421238	1.6052	0.987335	-1.05587	0.107053	-0.379986	1.83152	-2.3925	0.516678	-0.882746	2.01501	-1.77619	1.26702	-1.13644																			GO:0000786	nucleosome	GO:0003677;GO:0046982	DNA binding;protein heterodimerization activity	N/A	N/A	GO:0005634;GO:0005654	nucleoplasm;nucleus	GO:0003677;GO:0042301	DNA binding;phosphate ion binding
Tb927.7.4910:mRNA-p1;Tb11.v5.0172.1-p1	Tb927.7.4910:mRNA-p1;Tb11.v5.0172.1-p1	Tb927.7.4910;Tb11.v5.0172	hypothetical protein, conserved;hypothetical protein, conserved	0.697946	-0.85353	0.919288	-1.26822	1.20681	-1.52481	0.663323	-0.877568	0.883938	0.96756	1.21811	-2.04791	0.862767	-1.36572	1.14356	-1.64763	0.885315	-0.98153														+					N/A	N/A	N/A	N/A	N/A	N/A	GO:0005930	axoneme	N/A	N/A
Tb927.4.1300:mRNA-p1	Tb927.4.1300:mRNA-p1	Tb927.4.1300	amidinotransferase, putative	0.558638	-0.853793	0.201505	0.857213	0.0678962	0.179383	0.048806	-0.126934	0.0118041	0.0571756	0.00555826	0.029994	0.150056	-0.408587	0.137108	-0.298333	0.393842	-0.720829																			N/A	N/A	N/A	N/A	N/A	N/A	GO:0005856;GO:0030863	cortical cytoskeleton;cytoskeleton	N/A	N/A
Tb927.10.7060:mRNA-p1	Tb927.10.7060:mRNA-p1	Tb927.10.7060	Nucleoporin NUP96	1.95093	-0.854734	0.878214	-4.51789	0.161904	-0.117859	0.452227	-0.36887	2.0265	-1.76459	4.2011	8.73695	4.20462	8.05978	0.238276	-0.383223	0.148089	-0.141246															+	+	+	+	GO:0005643;GO:0016020	membrane;nuclear pore	GO:0017056	structural constituent of nuclear pore	N/A	N/A	GO:0005634;GO:0005643;GO:0005737;GO:0044612	cytoplasm;nuclear pore;nuclear pore linkers;nucleus	GO:0017056	structural constituent of nuclear pore
Tb927.7.1680:mRNA-p1	Tb927.7.1680:mRNA-p1	Tb927.7.1680	Uncharacterised conserved protein (DUF2305), putative	1.34673	-0.858578	1.17757	-1.53148	1.56198	-1.47699	0.793791	-0.803533	1.87764	-2.2745	1.60923	-2.08991	1.10888	-0.875972	3.57198	2.87024	0.506091	0.832378									+	+									GO:0016021	integral component of membrane	N/A	N/A	N/A	N/A	GO:0005737;GO:0005811;GO:0031981;GO:0097014	ciliary plasm;cytoplasm;lipid droplet;nuclear lumen	N/A	N/A
Tb927.10.6700:mRNA-p1;Tb11.v5.0902.1-p1	Tb927.10.6700:mRNA-p1;Tb11.v5.0902.1-p1	Tb927.10.6700;Tb11.v5.0902	hypothetical protein, conserved;Kinetochore interacting protein 3	0.502129	-0.860031	1.73615	4.41286	1.35866	2.78551	0.938791	-1.37314	1.43362	-2.23837	1.23205	-2.23161	0.426064	-0.823515	0.481583	-1.0109	0.459201	-0.785923						+													N/A	N/A	GO:0005515	protein binding	N/A	N/A	GO:0000776;GO:0005634;GO:0005654;N/A	kinetochore;N/A;nucleoplasm;nucleus	N/A	N/A
Tb927.11.13230:mRNA-p1	Tb927.11.13230:mRNA-p1	Tb927.11.13230	VAMP-associated protein, putative	0.437147	-0.861522	0.544808	-1.25911	0.266748	-0.567105	0.368661	-0.984626	0.0130761	0.055534	2.2749	5.63214	1.81461	4.01805	2.3591	3.48399	0.235141	0.901152									+	+					+	+		+	GO:0005789;GO:0016021	endoplasmic reticulum membrane;integral component of membrane	N/A	N/A	N/A	N/A	GO:0005783;GO:0005789;GO:0005856;GO:0005886;GO:0020016;GO:0120119	ciliary pocket;cytoskeleton;endoplasmic reticulum;endoplasmic reticulum membrane;flagellum attachment zone;plasma membrane	N/A	N/A
Tb927.10.7630:mRNA-p1	Tb927.10.7630:mRNA-p1	Tb927.10.7630	transportin2- like protein	0.958761	-0.87362	0.276299	-0.440854	1.35157	-1.10805	0.652724	-1.0073	0.594862	-0.594152	2.10852	-1.93214	1.37241	-1.58834	1.15786	-1.66035	1.71214	-1.3637																			N/A	N/A	N/A	N/A	GO:0006606	protein import into nucleus	GO:0005634;GO:0005643;GO:0005737	cytoplasm;nuclear pore;nucleus	GO:0008139;GO:0061608	nuclear import signal receptor activity;nuclear localization sequence binding
Tb927.10.5480:mRNA-p1;Tb927.10.5460:mRNA-p1	Tb927.10.5480:mRNA-p1;Tb927.10.5460:mRNA-p1	Tb927.10.5480;Tb927.10.5460	60S ribosomal protein L24, putative;60S ribosomal protein L24, putative	0.159113	-0.875115	0.880156	-3.64524	0.460655	-1.97137	0.630748	-2.62688	0.976249	-4.03855	0.713158	-3.01148	0.255266	-1.69224	0.158771	0.947812	0.244233	-1.237																			N/A	N/A	N/A	N/A	N/A	N/A	GO:0005622;GO:0005737;GO:0005840;GO:0022625	cytoplasm;cytosolic large ribosomal subunit;intracellular anatomical structure;ribosome	GO:0003723;GO:0003735	RNA binding;structural constituent of ribosome
Tb927.2.280:mRNA-p1;Tb927.2.400:mRNA-p1;Tb11.v5.0533.1-p1	Tb927.2.280:mRNA-p1;Tb927.2.400:mRNA-p1	Tb927.2.280;Tb927.2.400	retrotransposon hot spot protein 2 (RHS2), putative;retrotransposon hot spot protein 2 (RHS2), putative	0.748672	-0.883594	1.03412	-1.72263	0.0042211	0.00920137	0.669372	-1.15033	0.0821433	-0.327496	1.24483	-2.14313	0.682224	1.20181	1.05575	-1.65478	0.371072	-0.689093																			N/A	N/A	N/A	N/A	N/A	N/A	GO:0005634;GO:0005737	cytoplasm;nucleus	N/A	N/A
Tb927.5.800:mRNA-p1;Tb927.5.790:mRNA-p1	Tb927.5.800:mRNA-p1	Tb927.5.800	casein kinase I, isoform 2	0.553253	-0.8864	0.112212	-0.40501	0.0869839	-0.2534	0.431501	-0.952514	0.132007	0.525294	0.467893	-1.06365	0.315939	-0.728436	1.18889	1.90383	0.369306	-0.805012																			N/A	N/A	GO:0004672;GO:0005524	ATP binding;protein kinase activity	GO:0006468	protein phosphorylation	GO:0005634;GO:0005737;GO:0031981;GO:0036064;GO:0051286;GO:0097014	cell tip;ciliary basal body;ciliary plasm;cytoplasm;nuclear lumen;nucleus	GO:0004674;GO:0005524	ATP binding;protein serine/threonine kinase activity
Tb927.5.2320:mRNA-p1	Tb927.5.2320:mRNA-p1	Tb927.5.2320	Mak10 subunit, NatC N(alpha)-terminal acetyltransferase, putative	1.54275	-0.886578	2.28802	-1.38471	1.09635	-1.47761	1.5363	-0.835324	1.91695	-2.7219	1.07065	-2.40767	2.20572	-1.99472	2.29113	1.97488	1.38921	-0.997087										+									GO:0031417	NatC complex	N/A	N/A	GO:0017196	N-terminal peptidyl-methionine acetylation	GO:0005737	cytoplasm	N/A	N/A
Tb927.3.2600:mRNA-p1	Tb927.3.2600:mRNA-p1	Tb927.3.2600	ATP-dependent DEAD/H RNA helicase, putative	0.704454	-0.89246	0.494023	-1.04423	0.775763	-0.97721	0.23418	-0.35775	0.217409	-0.33807	1.51345	-2.12138	0.287454	-0.488582	1.00463	-1.02923	1.72518	4.23716																			N/A	N/A	GO:0003676;GO:0004386;GO:0005524	ATP binding;helicase activity;nucleic acid binding	N/A	N/A	GO:0005737	cytoplasm	N/A	N/A
Tb927.8.1950:mRNA-p1	Tb927.8.1950:mRNA-p1	Tb927.8.1950	hypothetical protein, conserved	0.842828	-0.89471	0.700026	2.38525	0.146406	0.340736	1.15723	-1.96963	0.343072	0.894156	0.0252931	0.048192	0.490972	-0.791882	0.210777	0.325665	1.04627	3.58445																			N/A	N/A	N/A	N/A	N/A	N/A	GO:0005737	cytoplasm	N/A	N/A
Tb927.10.8950:mRNA-p1;Tb927.10.8970:mRNA-p1	Tb927.10.8950:mRNA-p1;Tb927.10.8970:mRNA-p1	Tb927.10.8950;Tb927.10.8970	kinetoplast-associated protein 4 isoform 1;kinetoplast-associated protein 4 isoform 2	0.152305	-0.895547	0.995275	-5.12009	0.879811	-4.49492	0.961242	-4.93794	0.836726	-4.26316	0.97414	-5.00382	0.669511	-3.43335	0.173469	0.811024	0.131762	-0.630352																			N/A	N/A	N/A	N/A	N/A	N/A	GO:0005654;GO:0005730;GO:0005739;GO:0020023;GO:0031981	kinetoplast;mitochondrion;nuclear lumen;nucleolus;nucleoplasm	GO:0003677;GO:0042301	DNA binding;phosphate ion binding
Tb927.5.2900:mRNA-p1	Tb927.5.2900:mRNA-p1	Tb927.5.2900	histone deacetylase 4	0.955997	-0.895772	1.57177	-0.941748	0.726992	-0.631456	1.80775	-1.22252	1.26541	-1.50762	2.48171	-2.00856	1.57341	-1.7726	0.423766	-0.799298	0.401587	1.38287																			N/A	N/A	N/A	N/A	N/A	N/A	GO:0005634;GO:0005737	cytoplasm;nucleus	GO:0004407	histone deacetylase activity
Tb927.4.3890:mRNA-p1	Tb927.4.3890:mRNA-p1	Tb927.4.3890	ATP-dependent RNA helicase, putative	1.66654	-0.898259	0.1853	-0.302475	1.45287	-1.15357	1.08887	-0.789673	0.667272	1.40831	1.18723	-1.04713	0.704257	0.607433	0.943865	-1.19441	0.393755	1.24952																			N/A	N/A	GO:0004386;GO:0005524	ATP binding;helicase activity	N/A	N/A	GO:0005737	cytoplasm	GO:0003723;GO:0003729	mRNA binding;RNA binding
Tb927.10.10960:mRNA-p1;Tb927.10.10950:mRNA-p1;Tb927.10.10940:mRNA-p1;Tb927.10.10920:mRNA-p1;Tb927.10.10900:mRNA-p1;Tb927.10.10890:mRNA-p1;Tb11.v5.0543.1-p1;Tb927.10.10910:mRNA-p1;Tb927.10.10980:mRNA-p1;Tb927.10.10970:mRNA-p1;Tb927.10.10930:mRNA-p1	Tb927.10.10960:mRNA-p1;Tb927.10.10950:mRNA-p1;Tb927.10.10940:mRNA-p1;Tb927.10.10920:mRNA-p1;Tb927.10.10900:mRNA-p1;Tb927.10.10890:mRNA-p1;Tb11.v5.0543.1-p1;Tb927.10.10910:mRNA-p1;Tb927.10.10980:mRNA-p1;Tb927.10.10970:mRNA-p1;Tb927.10.10930:mRNA-p1	Tb927.10.10960;Tb927.10.10950;Tb927.10.10940;Tb927.10.10920;Tb927.10.10900;Tb927.10.10890;Tb11.v5.0543;Tb927.10.10910;Tb927.10.10980;Tb927.10.10970;Tb927.10.10930	Heat shock protein 83, putative;heat shock protein, putative;heat shock protein, putative;heat shock protein, putative;heat shock protein, putative;heat shock protein, putative;heat shock protein, putative;heat shock protein, putative;heat shock protein, putative;heat shock protein, putative;heat shock protein 90, putative	0.52026	-0.901255	0.116835	-0.66483	0.415858	0.706018	0.183257	-0.224866	2.02193	2.83374	0.0664105	0.0791636	1.27731	1.37408	1.50064	-1.2078	0.136195	0.170569													+	+					N/A	N/A	GO:0005524;GO:0051082	ATP binding;unfolded protein binding	GO:0006457	protein folding	GO:0005654;GO:0005737;GO:0005813;GO:0005829;GO:0005886;GO:0009986;GO:0032991;GO:0048471	cell surface;centrosome;cytoplasm;cytosol;nucleoplasm;perinuclear region of cytoplasm;plasma membrane;protein-containing complex	GO:0016887;GO:0051082;N/A	ATP hydrolysis activity;N/A;unfolded protein binding
Tb927.5.3210:mRNA-p1	Tb927.5.3210:mRNA-p1	Tb927.5.3210	small ubiquitin-related modifier	0.672977	-0.904287	0.349762	1.14876	0.3651	0.302259	1.11307	-0.839009	1.96595	-2.5131	1.81947	-1.58477	0.901354	-0.910853	2.41125	-1.5198	0.756367	-1.0365																			N/A	N/A	GO:0005515	protein binding	N/A	N/A	GO:0005634;GO:0005730;GO:0005737;GO:0031981;GO:0097014	ciliary plasm;cytoplasm;nuclear lumen;nucleolus;nucleus	GO:0031386;GO:0044389	protein tag;ubiquitin-like protein ligase binding
Tb927.4.2750:mRNA-p1	Tb927.4.2750:mRNA-p1	Tb927.4.2750	hypothetical protein, conserved	0.805322	-0.909176	0.360688	-1.155	0.795341	-0.785563	1.03214	-1.51448	1.54767	-1.64475	0.26354	-0.860869	1.01109	-1.5186	1.09666	-1.53245	0.300012	1.10382																			N/A	N/A	N/A	N/A	N/A	N/A	GO:0005737;GO:0097014	ciliary plasm;cytoplasm	N/A	N/A
Tb927.11.11090:mRNA-p1	Tb927.11.11090:mRNA-p1	Tb927.11.11090	Nucleoporin NUP140	0.460557	-0.912701	0.343579	-0.795196	0.289281	-0.648414	2.47947	6.85772	2.69477	8.44766	1.25078	2.55179	2.20517	5.52709	0.983145	-1.52839	0.372063	-0.580664												+	+	+		+		+	N/A	N/A	GO:0005515	protein binding	N/A	N/A	GO:0005634;GO:0005643;GO:0005737;GO:0031981;GO:0097014	ciliary plasm;cytoplasm;nuclear lumen;nuclear pore;nucleus	N/A	N/A
Tb927.11.4700:mRNA-p1	Tb927.11.4700:mRNA-p1	Tb927.11.4700	prostaglandin f synthase	0.990027	-0.917814	0.283532	1.05157	0.241009	0.22711	0.726429	-0.7817	0.0982404	-0.292778	0.885914	-1.30548	0.465576	-0.393709	2.07119	-1.82063	0.947485	-0.984916																			N/A	N/A	GO:0016491	oxidoreductase activity	GO:0055114	obsolete oxidation-reduction process	GO:0005654;GO:0005737;GO:0031981;GO:0097014	ciliary plasm;cytoplasm;nuclear lumen;nucleoplasm	GO:0004033;GO:0045290	aldo-keto reductase (NADP) activity;D-arabinose 1-dehydrogenase [NAD(P)+] activity
Tb927.9.9710:mRNA-p1	Tb927.9.9710:mRNA-p1	Tb927.9.9710	Histidine phosphatase superfamily (branch 1), putative	0.955264	-0.920418	0.446633	-1.25336	0.891918	-0.605455	2.67218	-1.40847	1.03346	-1.96106	2.35053	0.980242	1.44569	-1.46545	1.05271	-1.18797	2.42212	-1.4357															+	+			N/A	N/A	N/A	N/A	N/A	N/A	GO:0005737;GO:0005811	cytoplasm;lipid droplet	GO:0016868	intramolecular transferase activity, phosphotransferases
Tb927.3.1085:mRNA-p1	Tb927.3.1085:mRNA-p1	Tb927.3.1085	hypothetical protein	1.2688	-0.920687	1.20691	-1.05573	0.0893135	-0.116277	1.477	-1.99509	0.804348	-1.07505	2.25783	2.62043	0.417825	-0.494395	0.834374	-0.835071	1.44674	-1.22026															+	+			N/A	N/A	N/A	N/A	N/A	N/A	GO:0005635;GO:0005737;GO:0005783;GO:0031981;GO:0097014	ciliary plasm;cytoplasm;endoplasmic reticulum;nuclear envelope;nuclear lumen	N/A	N/A
Tb927.3.4790:mRNA-p1;Tb927.3.4750:mRNA-p1	Tb927.3.4790:mRNA-p1;Tb927.3.4750:mRNA-p1	Tb927.3.4790;Tb927.3.4750	Aminopeptidase M1, putative;Aminopeptidase M1, putative	0.582641	-0.922	0.110215	-0.19608	0.521935	-0.824115	0.369797	-0.670993	0.983639	-1.46313	0.593706	-1.01105	0.711426	-1.05504	0.664951	-1.10611	0.69392	-0.987962																			N/A	N/A	GO:0008237;GO:0008270	metallopeptidase activity;zinc ion binding	GO:0006508	proteolysis	GO:0005654;GO:0005737;GO:0097014	ciliary plasm;cytoplasm;nucleoplasm	GO:0008270;GO:0042277;GO:0070006	metalloaminopeptidase activity;peptide binding;zinc ion binding
Tb927.11.13180:mRNA-p1	Tb927.11.13180:mRNA-p1	Tb927.11.13180	Present in the outer mitochondrial membrane proteome 10	0.690135	-0.922178	0.617095	-0.772822	0.414758	-0.571646	0.0750889	-0.114699	0.219387	0.832853	0.41734	-0.548779	0.129223	0.413582	0.730771	-0.925729	0.557965	1.40827																			N/A	N/A	N/A	N/A	N/A	N/A	GO:0005739;GO:0005741;GO:0005743	mitochondrial inner membrane;mitochondrial outer membrane;mitochondrion	N/A	N/A
Tb927.11.8165:mRNA-p1	Tb927.11.8165:mRNA-p1	Tb927.11.8165	hypothetical protein	0.160514	-0.925187	0.985535	-4.8604	0.872105	-4.14791	0.924239	-4.53388	1.06742	-5.1917	1.07634	-5.17345	0.906457	-4.24904	0.0755704	0.33561	0.531203	-2.58496																			N/A	N/A	N/A	N/A	N/A	N/A	GO:0005730	nucleolus	N/A	N/A
Tb927.4.1540:mRNA-p1	Tb927.4.1540:mRNA-p1	Tb927.4.1540	NAD dependent epimerase/dehydratase family, putative	1.56174	-0.925208	0.802793	-0.576264	0.044625	-0.0367413	1.16774	-0.820125	1.1726	1.13556	0.716674	-1.1318	2.46884	1.97667	0.178106	-0.239391	0.378953	-0.518351														+				+	GO:0016021	integral component of membrane	GO:0003824	catalytic activity	N/A	N/A	GO:0005739;GO:0005741	mitochondrial outer membrane;mitochondrion	N/A	N/A
Tb927.11.15990:mRNA-p1	Tb927.11.15990:mRNA-p1	Tb927.11.15990	Nucleoporin NUP109	0.668592	-0.927751	0.409665	-0.615346	0.740734	-1.07468	3.04878	4.32586	3.1047	4.55793	3.38475	5.66765	3.54377	6.35048	4.01182	4.49936	0.844561	-0.812081									+	+	+	+	+	+	+	+	+	+	N/A	N/A	N/A	N/A	N/A	N/A	GO:0005634;GO:0005643;GO:0031080	nuclear pore;nuclear pore outer ring;nucleus	N/A	N/A
Tb927.1.2100:mRNA-p1	Tb927.1.2100:mRNA-p1	Tb927.1.2100	Calpain-like protein 1.1	1.58011	-0.929106	1.14065	-0.458318	0.0434782	-0.0386035	0.853966	-0.688799	0.0232093	-0.0156228	2.43991	-2.07206	0.798254	1.22383	0.491178	-0.752141	0.157207	-0.0907281																			N/A	N/A	GO:0004198	calcium-dependent cysteine-type endopeptidase activity	GO:0006508	proteolysis	GO:0097542;GO:0097740	ciliary tip;paraflagellar rod	N/A	N/A
Tb927.4.2630:mRNA-p1	Tb927.4.2630:mRNA-p1	Tb927.4.2630	ATP-dependent DEAD/H RNA helicase, putative	0.424513	-0.935195	0.509667	-1.4355	0.13574	0.443555	0.0519975	-0.179132	0.573217	-1.61393	0.454017	-1.26329	0.11143	-0.391351	0.447438	-1.03677	0.329474	-0.749322																			GO:0005634	nucleus	GO:0003676;GO:0003723;GO:0003724;GO:0004386;GO:0005524	ATP binding;helicase activity;nucleic acid binding;RNA binding;RNA helicase activity	N/A	N/A	GO:0005634;GO:0005730	nucleolus;nucleus	GO:0004386;GO:0005524;GO:0042301	ATP binding;helicase activity;phosphate ion binding
Tb927.10.15210:mRNA-p1	Tb927.10.15210:mRNA-p1	Tb927.10.15210	nuclear cap binding complex subunit CBP30	0.635737	-0.937771	0.49296	1.4821	0.827412	-0.657519	0.729415	-0.924779	1.70046	-1.56147	1.35453	-1.24775	0.932065	-1.56706	1.29376	-1.2377	0.330111	-0.660302																			GO:0005846	nuclear cap binding complex	N/A	N/A	N/A	N/A	GO:0005634;GO:0005654;GO:0005730;GO:0005739;GO:0005846	mitochondrion;nuclear cap binding complex;nucleolus;nucleoplasm;nucleus	N/A	N/A
Tb927.3.5450:mRNA-p1	Tb927.3.5450:mRNA-p1	Tb927.3.5450	Basal body protein	0.665006	-0.939047	1.4607	-1.85321	1.0881	1.12908	1.13469	-1.45341	0.75754	-1.47864	1.52475	-1.7494	0.800978	-0.91025	1.63661	-1.34986	1.08296	-1.22097																			N/A	N/A	N/A	N/A	N/A	N/A	GO:0005737;GO:0036064;GO:0120280	ciliary basal body;ciliary pro-basal body;cytoplasm	N/A	N/A
Tb927.6.2790:mRNA-p1;REV__Tb927.6.2790:mRNA-p1	Tb927.6.2790:mRNA-p1	Tb927.6.2790	L-threonine 3-dehydrogenase	0.683702	-0.939132	0.0580071	-0.187588	0.349919	-0.651462	1.05867	-1.84289	0.500866	1.72546	1.32792	-2.39468	1.91104	3.98637	1.18683	-1.52975	0.645374	-1.08852																		+	N/A	N/A	GO:0003824	catalytic activity	N/A	N/A	GO:0005739	mitochondrion	GO:0005515;GO:0008743	L-threonine 3-dehydrogenase activity;protein binding
Tb927.9.13460:mRNA-p1	Tb927.9.13460:mRNA-p1	Tb927.9.13460	Spt4/RpoE2 zinc finger, putative	1.57034	-0.940305	0.293633	1.64159	0.742351	-0.534507	1.8199	-1.46016	2.46617	-2.46125	1.32651	-1.40695	0.779558	-0.902887	1.37312	-1.63063	0.0920009	-0.29553																			GO:0005634	nucleus	GO:0008270	zinc ion binding	GO:0006355;GO:0032786	positive regulation of DNA-templated transcription, elongation;regulation of transcription, DNA-templated	GO:0005654	nucleoplasm	N/A	N/A
Tb927.9.3480:mRNA-p1	Tb927.9.3480:mRNA-p1	Tb927.9.3480	U5Cwc21 small nuclear ribonucleoprotein	0.762508	-0.942836	0.124982	-0.275	1.20209	-1.23639	0.174984	-0.399891	1.04471	-1.51461	1.00873	-0.986621	1.04037	-1.09048	1.29086	-1.57763	1.69774	-1.2544																			N/A	N/A	N/A	N/A	N/A	N/A	GO:0005634;GO:0005654;GO:0005737;GO:0005829;GO:0097525	cytoplasm;cytosol;nucleoplasm;nucleus;spliceosomal snRNP complex	N/A	N/A
Tb927.3.1390:mRNA-p1	Tb927.3.1390:mRNA-p1	Tb927.3.1390	LMBR1-like membrane protein, putative	1.36078	-0.943316	1.07024	-1.01158	1.58636	-1.19126	0.794538	-0.645821	2.60896	-2.11309	3.24462	3.30488	0.107793	0.273524	2.09089	-1.10695	0.969049	-0.824824															+	+			GO:0016021	integral component of membrane	N/A	N/A	N/A	N/A	GO:0005794;GO:0020016	ciliary pocket;Golgi apparatus	N/A	N/A
Tb927.2.470:mRNA-p1	Tb927.2.470:mRNA-p1	Tb927.2.470	retrotransposon hot spot protein 4 (RHS4), putative	0.653925	-0.945606	1.1506	-0.732682	1.41439	-1.66259	0.641554	-1.03672	0.211171	-0.699952	0.617029	-0.402634	3.17518	3.00493	2.9049	-1.26968	1.2794	-0.594675																	+	+	N/A	N/A	N/A	N/A	N/A	N/A	GO:0005634	nucleus	N/A	N/A
Tb927.10.12700:mRNA-p1	Tb927.10.12700:mRNA-p1	Tb927.10.12700	pyruvate dehydrogenase E1 alpha subunit, putative	0.916727	-0.949877	0.894858	-1.00877	0.875608	-0.683213	0.184276	0.103257	0.0679115	-0.176425	3.07686	-1.57494	0.291018	-0.605551	1.44004	-1.34023	1.30877	-0.919964																			N/A	N/A	GO:0016624	oxidoreductase activity, acting on the aldehyde or oxo group of donors, disulfide as acceptor	N/A	N/A	GO:0005737;GO:0005739;GO:0005967	cytoplasm;mitochondrial pyruvate dehydrogenase complex;mitochondrion	GO:0004739;GO:0016624	oxidoreductase activity, acting on the aldehyde or oxo group of donors, disulfide as acceptor;pyruvate dehydrogenase (acetyl-transferring) activity
Tb927.9.10710:mRNA-p1	Tb927.9.10710:mRNA-p1	Tb927.9.10710	hsp70 subfamily B suppressor 1	1.21834	-0.950052	0.992852	-1.22815	0.442194	-0.699943	0.669163	-0.971455	1.96833	-2.56458	1.19834	-1.58063	0.340723	-0.56435	0.850841	-1.05916	0.912099	2.25293																			N/A	N/A	GO:0003924;GO:0005525	GTP binding;GTPase activity	N/A	N/A	GO:0005737;GO:0005853;GO:0097014	ciliary plasm;cytoplasm;eukaryotic translation elongation factor 1 complex	GO:0003746;GO:0003924	GTPase activity;translation elongation factor activity
Tb927.7.2640:mRNA-p1	Tb927.7.2640:mRNA-p1	Tb927.7.2640	Cytoskeleton associated protein 51	0.845336	-0.952587	0.476259	-1.14682	0.699856	-1.0943	0.35012	-1.2098	1.35967	-2.11854	0.650369	-1.19747	0.481213	-0.947926	0.907961	-1.75961	1.71947	5.26754																			N/A	N/A	N/A	N/A	N/A	N/A	GO:0005856;GO:0020025;GO:0030863	cortical cytoskeleton;cytoskeleton;subpellicular microtubule	GO:0044877	protein-containing complex binding
Tb927.11.7350:mRNA-p1	Tb927.11.7350:mRNA-p1	Tb927.11.7350	Histone H2B variant V	2.03207	-0.952759	0.0624182	-0.189411	0.804937	-0.760498	0.626503	-0.990095	2.25467	-1.74538	1.46102	-1.56737	0.615766	-0.572412	2.18935	-1.69621	2.79668	-1.43935																			GO:0000786	nucleosome	GO:0003677;GO:0046982	DNA binding;protein heterodimerization activity	N/A	N/A	GO:0005634;GO:0005654	nucleoplasm;nucleus	GO:0003677	DNA binding
Tb927.9.5320:mRNA-p1	Tb927.9.5320:mRNA-p1	Tb927.9.5320	nucleolar RNA binding protein, putative	0.939143	-0.95365	0.162677	0.884383	2.0492	3.54881	1.03875	-1.11633	1.65479	-2.09953	1.17515	-1.46132	0.308216	-0.844088	1.22037	-1.21	1.24524	-0.968081																			N/A	N/A	N/A	N/A	N/A	N/A	GO:0005634;GO:0005730	nucleolus;nucleus	GO:0003729;GO:0030515	mRNA binding;snoRNA binding
Tb927.3.3780:mRNA-p1;Tb927.3.3760:mRNA-p1	Tb927.3.3780:mRNA-p1;Tb927.3.3760:mRNA-p1	Tb927.3.3780;Tb927.3.3760	tryparedoxin 1b, putative;tryparedoxin 1a, putative	1.42709	-0.957249	0.150987	-0.634848	1.03168	-0.599414	1.21079	-1.67242	1.98776	-1.78604	1.42599	-1.88552	0.824341	-0.661928	2.30893	-1.66824	1.44938	-1.22077																			N/A	N/A	N/A	N/A	N/A	N/A	GO:0005737;GO:0020015;GO:0031981;GO:0097014	ciliary plasm;cytoplasm;glycosome;nuclear lumen	N/A	N/A
Tb927.9.13280:mRNA-p1	Tb927.9.13280:mRNA-p1	Tb927.9.13280	Double RNA binding domain protein 9	0.463606	-0.957418	0.788289	-1.2486	0.804701	-0.890271	0.833451	-1.52217	1.14386	-1.54771	1.05637	-1.71843	0.51667	-0.951171	1.20249	-1.90733	0.967265	-1.16792																			N/A	N/A	GO:0003676	nucleic acid binding	N/A	N/A	GO:0005634;GO:0005730	nucleolus;nucleus	GO:0003723	RNA binding
Tb927.9.11600:mRNA-p1	Tb927.9.11600:mRNA-p1	Tb927.9.11600	glycosomal membrane protein	1.27253	-0.957468	0.0269997	-0.15689	0.781509	-0.976552	1.04392	1.07648	2.37745	4.84229	0.984111	0.959013	3.2386	6.14186	1.70409	-1.9354	0.830674	-0.771938													+	+		+	+	+	GO:0005779	integral component of peroxisomal membrane	N/A	N/A	GO:0016559	peroxisome fission	GO:0020015;GO:0046860	glycosome;glycosome membrane	N/A	N/A
Tb927.11.4950:mRNA-p1	Tb927.11.4950:mRNA-p1	Tb927.11.4950	hypothetical protein, conserved	0.676041	-0.958065	0.616689	-1.1646	0.490833	-0.901857	0.00364995	-0.00976181	0.871489	-1.44867	1.17779	-1.95249	0.362358	-0.725346	0.982701	-1.39939	0.412025	1.90835																			N/A	N/A	N/A	N/A	N/A	N/A	GO:0005737;GO:0005929	cilium;cytoplasm	N/A	N/A
Tb927.5.1100:mRNA-p1	Tb927.5.1100:mRNA-p1	Tb927.5.1100	peroxisome targeting signal 1 receptor	0.597301	-0.960921	0.0829271	0.268218	0.471237	-1.07442	0.315223	-0.794551	0.432918	-0.932163	0.577571	-1.21418	0.152737	-0.484572	0.552781	-1.10475	0.260357	0.742962																			N/A	N/A	GO:0005515	protein binding	N/A	N/A	GO:0005737;GO:0005778;GO:0005829	cytoplasm;cytosol;peroxisomal membrane	GO:0005052	peroxisome matrix targeting signal-1 binding
Tb927.4.2220:mRNA-p1	Tb927.4.2220:mRNA-p1	Tb927.4.2220	TPR-repeat-containing chaperone protein DNAJ, putative	0.685105	-0.965631	1.25817	-1.58764	1.24984	-0.919578	1.14098	-1.19968	2.59131	2.45689	1.45067	-1.66844	1.98695	-1.51647	2.56819	-1.78187	1.66025	2.87295													+	+					N/A	N/A	GO:0005515	protein binding	N/A	N/A	GO:0030133;GO:0036064;GO:0051286;GO:0120120	bilobe structure;cell tip;ciliary basal body;transport vesicle	N/A	N/A
Tb927.7.5160:mRNA-p1	Tb927.7.5160:mRNA-p1	Tb927.7.5160	deoxyuridine triphosphatase	1.23336	-0.967019	0.0566118	0.198176	1.48318	-1.42618	0.223397	-0.257992	1.30515	-1.97277	0.729649	-1.26107	0.839378	-0.800762	2.14752	-1.56855	0.872249	-1.12842																			N/A	N/A	GO:0004170;GO:0046872	dUTP diphosphatase activity;metal ion binding	N/A	N/A	GO:0005654;GO:0005829	cytosol;nucleoplasm	N/A	N/A
Tb927.11.7510:mRNA-p1;Tb927.11.7460:mRNA-p1	Tb927.11.7510:mRNA-p1;Tb927.11.7460:mRNA-p1	Tb927.11.7510;Tb927.11.7460	luminal binding protein 1 (BiP), putative;luminal binding protein 1 (BiP), putative	0.583082	-0.969377	0.791077	-1.28135	0.20823	-0.35722	0.0232719	0.0533902	0.381657	-0.617981	0.656038	-1.01482	0.313993	-0.50256	1.118	-1.37283	0.728513	-0.847679																			N/A	N/A	N/A	N/A	N/A	N/A	GO:0005634;GO:0005737;GO:0005783;GO:0005788;GO:0016020;GO:0034663	cytoplasm;endoplasmic reticulum;endoplasmic reticulum chaperone complex;endoplasmic reticulum lumen;membrane;nucleus	GO:0005524;GO:0016887;GO:0031072;GO:0044183;GO:0051082;GO:0051787	ATP binding;ATP hydrolysis activity;heat shock protein binding;misfolded protein binding;protein folding chaperone;unfolded protein binding
Tb927.9.2050:mRNA-p1	Tb927.9.2050:mRNA-p1	Tb927.9.2050	membrane protein YIP1, putative	0.85433	-0.970303	1.63016	-0.66047	0.620579	-0.213695	0.30477	-0.931598	2.33532	-1.81599	3.4855	4.70538	0.818493	-0.97985	0.0195846	0.105497	1.284	-0.920692															+	+			N/A	N/A	N/A	N/A	N/A	N/A	GO:0005794;GO:0016021;GO:0030133	Golgi apparatus;integral component of membrane;transport vesicle	N/A	N/A
Tb927.10.4120.1:mRNA-p1;Tb927.10.4120.2:mRNA-p1;Tb927.10.4110:mRNA-p1	Tb927.10.4120.1:mRNA-p1;Tb927.10.4120.2:mRNA-p1;Tb927.10.4110:mRNA-p1	Tb927.10.4120;Tb927.10.4110	60S ribosomal protein L30;60S ribosomal protein L30;60S ribosomal protein L30	0.224695	-0.971345	0.00598961	-0.0324554	0.0436833	0.16965	0.266951	-1.04125	0.473922	1.59309	0.129919	0.474908	0.602223	1.85867	0.264867	0.892482	1.01869	-2.42825																			GO:0022625	cytosolic large ribosomal subunit	GO:0003723;GO:0003735	RNA binding;structural constituent of ribosome	N/A	N/A	GO:0005622;GO:0005730;GO:0005737;GO:0005840;GO:0022625	cytoplasm;cytosolic large ribosomal subunit;intracellular anatomical structure;nucleolus;ribosome	GO:0003723;GO:0003735	RNA binding;structural constituent of ribosome
Tb927.5.730:mRNA-p1;Tb927.5.720:mRNA-p1	Tb927.5.730:mRNA-p1;Tb927.5.720:mRNA-p1	Tb927.5.730;Tb927.5.720	hypothetical protein;hypothetical protein	0.653188	-0.975622	0.0584671	0.240524	0.538057	-0.498427	1.02102	-1.08181	2.44725	-2.87241	1.82331	-1.72613	1.72017	-1.59123	0.939095	-1.29282	1.03479	-0.895809																			N/A	N/A	N/A	N/A	N/A	N/A	GO:0005737;GO:0030133;GO:0031981;GO:0097014	ciliary plasm;cytoplasm;nuclear lumen;transport vesicle	N/A	N/A
Tb927.5.3090:mRNA-p1	Tb927.5.3090:mRNA-p1	Tb927.5.3090	Mitochondrial ATP synthase subunit, putative	1.16481	-0.978669	0.70615	-0.665534	1.07018	-1.10164	0.246669	0.399039	0.298233	-0.788434	1.14637	-1.80993	1.11931	-1.72309	1.52777	-1.7001	1.75491	-1.24156																			N/A	N/A	N/A	N/A	N/A	N/A	GO:0005737;GO:0005739;GO:0005753;GO:0030133;GO:0031981;GO:0097014	ciliary plasm;cytoplasm;mitochondrial proton-transporting ATP synthase complex;mitochondrion;nuclear lumen;transport vesicle	N/A	N/A
Tb927.1.3450:mRNA-p1;Tb11.v5.0619.1-p1	Tb927.1.3450:mRNA-p1;Tb11.v5.0619.1-p1	Tb927.1.3450;Tb11.v5.0619	COG4 transport protein, putative;hypothetical protein, conserved	0.784032	-0.980153	2.64744	-2.07536	2.10722	-1.74634	1.47868	-1.48867	2.96294	-2.65875	3.42831	4.2786	3.28597	3.74567	2.40821	1.11945	1.14824	-1.43028										+					+	+	+	+	N/A	N/A	N/A	N/A	N/A	N/A	GO:0005634;GO:0005730;GO:0005737;GO:0005819;GO:0031981;N/A	cytoplasm;N/A;nuclear lumen;nucleolus;nucleus;spindle	N/A	N/A
Tb927.10.10280:mRNA-p1	Tb927.10.10280:mRNA-p1	Tb927.10.10280	Microtubule-associated repetitive protein 2	0.933209	-0.990315	0.789792	-1.09757	0.96317	-1.35751	0.976269	-2.00545	0.167252	0.545235	1.4129	-2.51486	1.96792	2.32036	1.64281	-1.26499	2.8413	4.97537		+																+	N/A	N/A	GO:0008017	microtubule binding	N/A	N/A	GO:0005737;GO:0005856;GO:0030863;GO:0036064	ciliary basal body;cortical cytoskeleton;cytoplasm;cytoskeleton	GO:0008017	microtubule binding
Tb927.9.1410:mRNA-p1	Tb927.9.1410:mRNA-p1	Tb927.9.1410	SUMO-interacting motif-containing protein	0.604733	-0.995459	2.47065	7.3894	2.24837	5.33166	0.66049	-1.20585	0.747188	-1.46287	0.963786	-1.95078	0.605801	-1.24024	0.553982	-1.2197	0.816849	-1.35888						+		+											N/A	N/A	N/A	N/A	N/A	N/A	GO:0005634;GO:0005643	nuclear pore;nucleus	N/A	N/A
Tb927.10.2810:mRNA-p1	Tb927.10.2810:mRNA-p1	Tb927.10.2810	hypothetical protein, conserved	0.816258	-0.997675	0.40301	-1.03139	0.707212	-1.31678	0.794232	-1.50072	1.88924	-1.82337	1.47498	-1.02608	1.01043	-0.987695	2.27865	2.22367	0.873629	-1.42697										+									N/A	N/A	N/A	N/A	N/A	N/A	N/A	N/A	N/A	N/A
Tb927.9.10770:mRNA-p1	Tb927.9.10770:mRNA-p1	Tb927.9.10770	polyadenylate-binding protein 2	0.747553	-0.999104	0.106286	0.318063	0.818353	-1.16412	1.01665	-1.51173	0.604952	1.23109	0.362408	-0.856361	1.39516	2.4326	0.682637	-0.816913	0.749076	-1.18298																			N/A	N/A	GO:0003676;GO:0003723	nucleic acid binding;RNA binding	N/A	N/A	GO:0000932;GO:0005634;GO:0005737;GO:0005829;GO:0005844;GO:0010494;GO:0097165;GO:1990904	cytoplasm;cytoplasmic stress granule;cytosol;nuclear stress granule;nucleus;P-body;polysome;ribonucleoprotein complex	GO:0003723;GO:0003730;GO:0008143;GO:0008266;GO:0042162	mRNA 3'-UTR binding;poly(A) binding;poly(U) RNA binding;RNA binding;telomeric DNA binding
Tb927.11.15150:mRNA-p1	Tb927.11.15150:mRNA-p1	Tb927.11.15150	1-acyl-sn-glycerol-3-phosphate acyltransferase, putative	0.798901	-1.00103	0.56376	-1.22055	0.701264	-1.29491	0.242614	-0.554957	0.701581	-1.2563	2.24384	4.96573	0.71587	-1.22877	1.11106	-1.46101	0.472463	-0.810605															+	+			GO:0016021	integral component of membrane	GO:0016746	acyltransferase activity	N/A	N/A	GO:0016021	integral component of membrane	GO:0003841	1-acylglycerol-3-phosphate O-acyltransferase activity
Tb927.8.1270:mRNA-p1	Tb927.8.1270:mRNA-p1	Tb927.8.1270	Nucleolar protein 54	0.211914	-1.00503	1.12167	-4.09758	0.883572	-3.1431	1.07507	-3.90674	1.13477	-4.10388	1.1419	-4.29488	0.893322	-3.30992	0.335558	1.09004	0.336166	-1.02677																			N/A	N/A	N/A	N/A	N/A	N/A	GO:0005634;GO:0005730;GO:0005819	nucleolus;nucleus;spindle	N/A	N/A
Tb927.11.1090:mRNA-p1;Tb927.11.1110.1-p1;Tb11.v5.1038.1-p1;Tb927.11.1100:mRNA-p1	Tb927.11.1090:mRNA-p1;Tb927.11.1110.1-p1;Tb11.v5.1038.1-p1	Tb927.11.1090;Tb927.11.1110;Tb11.v5.1038	calpain-like cysteine peptidase, putative;calpain-like protein, putative;calpain, putative	1.12565	-1.00966	0.108981	0.243634	0.0749669	0.0892804	1.42497	-1.5252	1.21329	-2.05554	0.893782	-1.74183	1.20119	-1.20963	1.07024	-1.17389	0.557425	1.45851																			N/A	N/A	GO:0004198;N/A	calcium-dependent cysteine-type endopeptidase activity;N/A	GO:0006508;N/A	N/A;proteolysis	GO:0005737;GO:0005929;GO:0036064;GO:0120119;N/A	ciliary basal body;cilium;cytoplasm;flagellum attachment zone;N/A	GO:0004198;N/A	calcium-dependent cysteine-type endopeptidase activity;N/A
Tb927.11.2910:mRNA-p1	Tb927.11.2910:mRNA-p1	Tb927.11.2910	phosphoglycerate mutase, putative	0.535054	-1.01196	0.624726	-1.43909	0.524718	-0.935836	0.318223	-0.585758	0.825728	-1.51756	0.763523	-1.64254	0.631349	-1.11935	0.615938	-1.16795	1.35063	-2.14769																			N/A	N/A	N/A	N/A	N/A	N/A	GO:0005737;GO:0005739;GO:0020023	cytoplasm;kinetoplast;mitochondrion	GO:0004619;GO:0016791;GO:0050897	cobalt ion binding;phosphatase activity;phosphoglycerate mutase activity
Tb927.11.10270:mRNA-p1	Tb927.11.10270:mRNA-p1	Tb927.11.10270	Golgi SNAP receptor complex member 1, putative	0.651964	-1.01542	1.13419	-1.70847	0.27764	0.348052	0.521906	-1.55424	1.45259	-1.11033	2.69968	2.89136	0.75597	-0.655634	3.01963	2.2842	0.66793	1.34081									+	+					+	+			GO:0000139;GO:0005801;GO:0016021	cis-Golgi network;Golgi membrane;integral component of membrane	N/A	N/A	GO:0006888;GO:0015031	endoplasmic reticulum to Golgi vesicle-mediated transport;protein transport	GO:0000139;GO:0005794;GO:0005797;GO:0005801;GO:0031201	cis-Golgi network;Golgi apparatus;Golgi medial cisterna;Golgi membrane;SNARE complex	GO:0005484	SNAP receptor activity
Tb927.10.8190:mRNA-p1	Tb927.10.8190:mRNA-p1	Tb927.10.8190	T-complex protein 1, theta subunit, putative	0.611302	-1.01763	0.358824	1.41207	0.560044	-1.20488	0.341368	-0.767745	0.32501	0.887898	0.102814	0.254755	0.262164	0.592788	0.930996	-1.6391	0.110066	0.283999																			N/A	N/A	GO:0005524;GO:0051082	ATP binding;unfolded protein binding	GO:0006457	protein folding	GO:0005737;GO:0005832	chaperonin-containing T-complex;cytoplasm	GO:0051082	unfolded protein binding
Tb927.10.13360:mRNA-p1	Tb927.10.13360:mRNA-p1	Tb927.10.13360	Elongation factor Tu, mitochondrial	0.990749	-1.02295	0.374209	-0.445196	0.384891	-0.440808	0.579128	-0.86032	1.47757	2.46939	1.09719	-1.53866	2.2228	3.13166	0.677215	-0.936782	0.710936	-0.596858													+	+				+	N/A	N/A	GO:0003924;GO:0005525	GTP binding;GTPase activity	N/A	N/A	GO:0005737;GO:0005739;GO:0020023	cytoplasm;kinetoplast;mitochondrion	GO:0003746	translation elongation factor activity
Tb927.9.6870:mRNA-p1	Tb927.9.6870:mRNA-p1	Tb927.9.6870	RNA-binding protein, putative	0.818782	-1.02329	2.50658	-8.12705	2.65743	-7.71473	2.78681	-7.88215	2.64308	-9.03303	2.88964	-8.54691	2.47606	-6.83091	0.559723	-1.01694	1.2982	-2.03562																			N/A	N/A	GO:0003676	nucleic acid binding	N/A	N/A	GO:0005634;GO:0005730;GO:0016607	nuclear speck;nucleolus;nucleus	GO:0003723	RNA binding
Tb927.8.6250:mRNA-p1	Tb927.8.6250:mRNA-p1	Tb927.8.6250	Nucleoporin NUP76	0.777569	-1.02416	0.826948	-1.33685	0.613002	-1.28692	3.14814	8.37159	3.02598	8.52189	2.47498	4.86286	1.88112	3.0195	0.852279	-0.93796	0.105892	-0.134917											+	+	+	+	+	+		+	N/A	N/A	N/A	N/A	N/A	N/A	GO:0005634;GO:0005643;GO:0044612	nuclear pore;nuclear pore linkers;nucleus	N/A	N/A
Tb927.10.16120:mRNA-p1	Tb927.10.16120:mRNA-p1	Tb927.10.16120	inosine-5'-monophosphate dehydrogenase	1.24506	-1.02464	1.89964	-2.30856	0.172842	-0.176917	1.94663	-2.1555	1.14502	1.53319	2.1509	-1.53867	1.36793	2.31339	1.39242	-1.24969	1.08952	-1.3812														+					N/A	N/A	GO:0003824;GO:0003938;GO:0016491	catalytic activity;IMP dehydrogenase activity;oxidoreductase activity	GO:0006164;GO:0055114	obsolete oxidation-reduction process;purine nucleotide biosynthetic process	GO:0005737;GO:0020015;GO:0097014	ciliary plasm;cytoplasm;glycosome	GO:0003938	IMP dehydrogenase activity
Tb927.9.15170:mRNA-p1;Tb927.9.15110:mRNA-p1	Tb927.9.15170:mRNA-p1;Tb927.9.15110:mRNA-p1	Tb927.9.15170;Tb927.9.15110	60S ribosomal protein L5, putative;60S ribosomal protein L5, putative	1.92431	-1.0316	1.0343	-1.34913	1.48106	-0.999805	1.47001	-5.61404	1.32952	-3.36983	2.14456	-1.53891	1.85306	-1.08306	1.58748	-2.77769	3.21837	-4.37776																			GO:0005840	ribosome	GO:0003735;GO:0008097	5S rRNA binding;structural constituent of ribosome	GO:0006412	translation	GO:0005730;GO:0005737;GO:0005840;GO:0022625	cytoplasm;cytosolic large ribosomal subunit;nucleolus;ribosome	GO:0003723;GO:0003735;GO:0005515;GO:0008097;GO:0044877	5S rRNA binding;protein binding;protein-containing complex binding;RNA binding;structural constituent of ribosome
Tb927.11.8230:mRNA-p1	Tb927.11.8230:mRNA-p1	Tb927.11.8230	hypothetical protein, conserved	1.28849	-1.03235	0.0557895	0.180296	1.01142	-0.623274	0.852916	-1.08192	0.301322	-0.754602	1.88264	-1.81352	1.9632	-1.34581	2.36202	-1.8149	0.123575	0.518268																			N/A	N/A	N/A	N/A	N/A	N/A	GO:0005737;GO:0097014	ciliary plasm;cytoplasm	N/A	N/A
Tb927.10.6510:mRNA-p1;Tb927.10.6400:mRNA-p1	Tb927.10.6510:mRNA-p1;Tb927.10.6400:mRNA-p1	Tb927.10.6510;Tb927.10.6400	chaperonin HSP60, mitochondrial precursor;chaperonin HSP60, mitochondrial precursor	0.544857	-1.03373	0.117725	0.505735	0.19492	-0.589512	0.258275	-0.726429	1.47441	4.36497	0.551705	-1.57103	1.78647	5.24589	0.573222	-1.09624	0.122847	-0.378915													+	+				+	N/A	N/A	GO:0005524	ATP binding	GO:0006457;GO:0042026	protein folding;protein refolding	GO:0005737;GO:0005739;GO:0005929	cilium;cytoplasm;mitochondrion	GO:0051082	unfolded protein binding
Tb927.10.13210:mRNA-p1;Tb11.v5.0694.1-p1	Tb927.10.13210:mRNA-p1;Tb11.v5.0694.1-p1	Tb927.10.13210;Tb11.v5.0694	glycosyltransferase, putative;dolichyl-P-Man:GDP-ManGlcNAc2-PP-dolichyl beta-1,4-mannosyltransferase, putative	0.84218	-1.03407	0.832981	-1.46769	0.184049	-0.367194	1.08295	-1.82654	0.960156	-1.65547	1.56706	2.87478	0.5465	-0.956908	1.54859	1.90175	0.237747	-0.499724										+					+	+			GO:0016021;N/A	integral component of membrane;N/A	GO:0000030	mannosyltransferase activity	N/A	N/A	GO:0005783;GO:0005789;N/A	endoplasmic reticulum;endoplasmic reticulum membrane;N/A	GO:0000030;GO:0004582;N/A	dolichyl-phosphate beta-D-mannosyltransferase activity;mannosyltransferase activity;N/A
Tb927.3.1920:mRNA-p1	Tb927.3.1920:mRNA-p1	Tb927.3.1920	General negative regulator of transcription subunit 5	0.761364	-1.03846	0.265561	-0.421699	0.615315	-0.990246	0.967847	-1.99337	1.14135	-2.71669	0.581505	-1.11857	0.835498	-1.21326	1.08819	-1.44605	0.222769	1.08334																			GO:0005634;GO:0030015	CCR4-NOT core complex;nucleus	N/A	N/A	GO:0006355	regulation of transcription, DNA-templated	GO:0000932;GO:0005737;GO:0010494;GO:0030015	CCR4-NOT core complex;cytoplasm;cytoplasmic stress granule;P-body	GO:0004535	poly(A)-specific ribonuclease activity
Tb927.7.2940:mRNA-p1;Tb927.7.2930:mRNA-p1;Tb927.7.2920:mRNA-p1;Tb927.7.2910:mRNA-p1;Tb927.7.2900:mRNA-p1;Tb927.7.2890:mRNA-p1;Tb927.7.2880:mRNA-p1;Tb927.7.2870:mRNA-p1;Tb927.7.2860:mRNA-p1;Tb927.7.2850:mRNA-p1;Tb927.7.2840:mRNA-p1;Tb927.7.2830:mRNA-p1;Tb927.7.2820:mRNA-p1	Tb927.7.2940:mRNA-p1;Tb927.7.2930:mRNA-p1;Tb927.7.2920:mRNA-p1;Tb927.7.2910:mRNA-p1;Tb927.7.2900:mRNA-p1;Tb927.7.2890:mRNA-p1;Tb927.7.2880:mRNA-p1;Tb927.7.2870:mRNA-p1;Tb927.7.2860:mRNA-p1;Tb927.7.2850:mRNA-p1;Tb927.7.2840:mRNA-p1;Tb927.7.2830:mRNA-p1;Tb927.7.2820:mRNA-p1	Tb927.7.2940;Tb927.7.2930;Tb927.7.2920;Tb927.7.2910;Tb927.7.2900;Tb927.7.2890;Tb927.7.2880;Tb927.7.2870;Tb927.7.2860;Tb927.7.2850;Tb927.7.2840;Tb927.7.2830;Tb927.7.2820	histone H2A, putative;histone H2A, putative;histone H2A, putative;histone H2A, putative;histone H2A, putative;histone H2A, putative;histone H2A, putative;histone H2A, putative;histone H2A, putative;histone H2A, putative;histone H2A, putative;histone H2A, putative;histone H2A, putative	1.4489	-1.03891	0.237103	0.969968	0.0874809	0.373771	0.4665	1.31431	1.64159	-1.54428	0.0663374	0.322333	1.14949	-0.929885	1.40915	-1.57372	0.81807	-0.669721																			GO:0000786	nucleosome	GO:0003677;GO:0046982	DNA binding;protein heterodimerization activity	N/A	N/A	GO:0005634;GO:0005654	nucleoplasm;nucleus	GO:0003677	DNA binding
Tb927.5.1220:mRNA-p1	Tb927.5.1220:mRNA-p1	Tb927.5.1220	hypothetical protein, conserved	1.39201	-1.03994	1.92254	3.2275	0.125761	-0.215693	0.512957	-0.515071	1.06925	-0.760245	1.08293	-0.817241	0.124175	-0.104803	1.63771	-1.70929	1.02008	-0.833684						+													N/A	N/A	N/A	N/A	N/A	N/A	GO:0005930	axoneme	N/A	N/A
Tb927.4.4680:mRNA-p1	Tb927.4.4680:mRNA-p1	Tb927.4.4680	DNA replication complex GINS protein PSF3	0.6463	-1.04115	0.0608064	0.184006	1.58378	-1.29241	1.68064	-1.86994	2.11335	-2.34237	1.57064	-1.27619	1.17691	-0.900168	1.43109	-1.43208	1.27874	-1.29463																			N/A	N/A	N/A	N/A	N/A	N/A	GO:0000811;GO:0005634;GO:0005654;GO:0005739;GO:0030133;GO:0071162	CMG complex;GINS complex;mitochondrion;nucleoplasm;nucleus;transport vesicle	N/A	N/A
Tb927.10.7990:mRNA-p1	Tb927.10.7990:mRNA-p1	Tb927.10.7990	replication factor C subunit 3, putative	1.06197	-1.04608	0.940001	-1.62098	0.446386	-0.65354	0.635832	-0.996285	1.20637	-1.72047	1.69318	-2.43954	0.114361	-0.267373	1.68175	-1.6802	0.914706	-0.948065																			N/A	N/A	GO:0003677	DNA binding	GO:0006260	DNA replication	GO:0005634;GO:0005654;GO:0005663	DNA replication factor C complex;nucleoplasm;nucleus	N/A	N/A
Tb927.3.3270:mRNA-p1	Tb927.3.3270:mRNA-p1	Tb927.3.3270	ATP-dependent 6-phosphofructokinase, glycosomal	0.607052	-1.04731	0.0262733	0.100444	0.570467	-0.847409	0.42218	-0.698359	0.393272	1.07669	0.095202	-0.168414	1.56779	2.65163	1.2759	-1.94518	1.10504	-1.24745																		+	GO:0020015	glycosome	GO:0003872;GO:0005524;GO:0046872	6-phosphofructokinase activity;ATP binding;metal ion binding	GO:0006002;GO:0006096	fructose 6-phosphate metabolic process;glycolytic process	GO:0005737;GO:0020015	cytoplasm;glycosome	GO:0003872;GO:0005524;GO:0042301	6-phosphofructokinase activity;ATP binding;phosphate ion binding
Tb927.7.6090:mRNA-p1	Tb927.7.6090:mRNA-p1	Tb927.7.6090	eukaryotic translation initiation factor 3 subunit a	0.708074	-1.0474	1.46797	-1.48206	0.601384	-0.679686	1.58672	-1.8015	0.170545	-0.365509	1.4738	-2.15438	1.27318	-1.48627	1.82462	-1.725	1.34346	3.17791																			GO:0005852	eukaryotic translation initiation factor 3 complex	GO:0003743	translation initiation factor activity	N/A	N/A	GO:0005737;GO:0005852;GO:0043614;GO:0071540;GO:0071541	cytoplasm;eukaryotic translation initiation factor 3 complex;eukaryotic translation initiation factor 3 complex, eIF3e;eukaryotic translation initiation factor 3 complex, eIF3m;multi-eIF complex	GO:0003729	mRNA binding
Tb927.7.4540:mRNA-p1;Tb11.v5.0267.1-p1	Tb927.7.4540:mRNA-p1;Tb11.v5.0267.1-p1	Tb927.7.4540;Tb11.v5.0267	Chromodomain protein 1;Chromodomain protein 1	1.03265	-1.04825	0.146352	0.594563	0.0761816	0.191812	0.353955	-0.805088	1.64539	-2.42438	0.146271	-0.424456	1.25572	-1.69072	1.65473	-1.59565	1.08631	-1.00968																			N/A	N/A	N/A	N/A	N/A	N/A	GO:0005634;GO:0005654	nucleoplasm;nucleus	N/A	N/A
Tb927.1.2390:mRNA-p1;Tb927.1.2370:mRNA-p1;Tb927.1.2350:mRNA-p1;Tb927.1.2330:mRNA-p1;Tb11.v5.0469.1-p1	Tb927.1.2390:mRNA-p1;Tb927.1.2370:mRNA-p1;Tb927.1.2350:mRNA-p1;Tb927.1.2330:mRNA-p1;Tb11.v5.0469.1-p1	Tb927.1.2390;Tb927.1.2370;Tb927.1.2350;Tb927.1.2330;Tb11.v5.0469	beta tubulin, putative;beta tubulin;beta tubulin;beta tubulin;beta tubulin	0.393511	-1.05204	0.488551	1.87526	0.466808	1.57829	0.345045	1.18281	1.20713	4.19123	0.192902	0.712833	1.60674	5.76031	0.234777	-0.719945	0.795739	-2.09214														+				+	GO:0005874	microtubule	GO:0003924;GO:0005200;GO:0005525	GTP binding;GTPase activity;structural constituent of cytoskeleton	GO:0007017	microtubule-based process	GO:0005737;GO:0005874	cytoplasm;microtubule	GO:0005200;GO:0005525	GTP binding;structural constituent of cytoskeleton
Tb927.3.4500:mRNA-p1;Tb11.v5.0629.1-p1	Tb927.3.4500:mRNA-p1;Tb11.v5.0629.1-p1	Tb927.3.4500;Tb11.v5.0629	fumarate hydratase, putative;Fumarate hydratase class I, cytosolic	0.894584	-1.05503	1.39932	-1.63967	0.846651	-0.966335	0.301883	-0.393673	0.113856	-0.246774	1.47761	-2.29459	0.809542	0.860865	1.24426	-1.15051	0.215976	0.505208																			N/A	N/A	GO:0004333;GO:0016829;GO:0016836;GO:0046872;GO:0051539	4 iron, 4 sulfur cluster binding;fumarate hydratase activity;hydro-lyase activity;lyase activity;metal ion binding	GO:0006091	generation of precursor metabolites and energy	GO:0005737;GO:0005829;GO:0020015;GO:0097014;N/A	ciliary plasm;cytoplasm;cytosol;glycosome;N/A	GO:0004333;N/A	fumarate hydratase activity;N/A
Tb927.10.2180:mRNA-p1;Tb11.v5.0512.1-p1	Tb927.10.2180:mRNA-p1;Tb11.v5.0512.1-p1	Tb927.10.2180;Tb11.v5.0512	Rtr1/RPAP2 family, putative;Rtr1/RPAP2 family, putative	0.966591	-1.05518	1.98028	4.16062	2.30091	4.09686	2.12373	3.08381	2.73069	4.94005	2.70598	4.87338	2.42139	3.89979	1.27464	-1.48084	0.113821	-0.136588						+		+				+	+	+	+	+		+	N/A	N/A	N/A	N/A	N/A	N/A	GO:0005737	cytoplasm	N/A	N/A
Tb927.2.4370:mRNA-p1;Tb11.v5.0653.1-p1	Tb927.2.4370:mRNA-p1;Tb11.v5.0653.1-p1	Tb927.2.4370;Tb11.v5.0653	trypanothione synthetase, putative;trypanothione synthetase	0.87394	-1.05724	0.672543	-1.16839	0.324373	-0.654412	0.174847	-0.499782	0.797762	-1.43478	1.15271	-2.00155	0.71764	-1.47269	0.432778	-0.65274	0.143598	0.59911																			N/A	N/A	GO:0047479;N/A	N/A;trypanothione synthase activity	N/A	N/A	GO:0005737;GO:0005829;GO:0020015;N/A	cytoplasm;cytosol;glycosome;N/A	GO:0015042;GO:0016874;N/A	ligase activity;N/A;trypanothione-disulfide reductase activity
Tb927.6.5030:mRNA-p1	Tb927.6.5030:mRNA-p1	Tb927.6.5030	Component of motile flagella protein 46	0.635313	-1.05887	0.587871	-1.32923	0.0572299	-0.172655	0.371192	-0.944513	0.291553	-0.711866	0.330209	-0.802668	0.0490428	-0.139554	0.261932	-0.529566	0.453908	1.24861																			N/A	N/A	GO:0005515	protein binding	N/A	N/A	GO:0005737;GO:0005930	axoneme;cytoplasm	N/A	N/A
Tb927.11.700:mRNA-p1;Tb11.0860:mRNA-p1	Tb927.11.700:mRNA-p1;Tb11.0860:mRNA-p1	Tb927.11.700;Tb11.0860	hypothetical protein;hypothetical protein, conserved	1.23198	-1.05946	0.910304	-1.36134	2.15742	-0.959759	1.79682	-1.4097	2.23155	-1.6462	2.19211	-1.78679	1.067	-0.277771	1.33488	-0.608043	1.65327	-0.701538																			N/A	N/A	N/A	N/A	N/A	N/A	GO:0005634;GO:0005730;N/A	N/A;nucleolus;nucleus	N/A	N/A
Tb927.9.9000:mRNA-p1	Tb927.9.9000:mRNA-p1	Tb927.9.9000	isopentenyl-diphosphate delta-isomerase (type II)	1.25531	-1.06162	0.587447	-0.793337	0.590632	-1.01337	0.871998	-0.591429	2.25241	-2.16159	1.96052	-1.36528	1.77161	-1.2494	0.440862	1.22932	0.820959	-0.732903																			N/A	N/A	GO:0003824;GO:0004452;GO:0010181;GO:0016491;GO:0046872	catalytic activity;FMN binding;isopentenyl-diphosphate delta-isomerase activity;metal ion binding;oxidoreductase activity	GO:0008299	isoprenoid biosynthetic process	GO:0005737;GO:0020015	cytoplasm;glycosome	N/A	N/A
Tb927.11.14020:mRNA-p1;Tb927.11.14000:mRNA-p1	Tb927.11.14020:mRNA-p1;Tb927.11.14000:mRNA-p1	Tb927.11.14020;Tb927.11.14000	nuclear RNA binding domain 1;nuclear RNA binding domain 2	0.381881	-1.06699	0.324792	-1.69163	0.555961	-2.13875	1.20225	-4.14091	0.556813	-1.80096	1.02522	-3.30509	0.568883	-1.85052	0.0673524	0.22254	0.17013	-0.880032																			N/A	N/A	GO:0003676	nucleic acid binding	N/A	N/A	GO:0005634;GO:0005737;GO:0030133;GO:1990904	cytoplasm;nucleus;ribonucleoprotein complex;transport vesicle	GO:0003723;GO:0003729;GO:0005515	mRNA binding;protein binding;RNA binding
Tb927.7.3980:mRNA-p1	Tb927.7.3980:mRNA-p1	Tb927.7.3980	tc40 antigen-like	2.06601	-1.0699	3.40836	-2.43406	1.74018	-1.81023	0.800029	-1.06909	0.3003	-1.02085	0.336695	-0.160562	0.0411881	0.0381692	2.55871	-1.93635	2.11685	3.59111																			N/A	N/A	N/A	N/A	N/A	N/A	GO:0005737;GO:0020022;GO:0051286	acidocalcisome;cell tip;cytoplasm	GO:0003729	mRNA binding
Tb927.7.3410:mRNA-p1	Tb927.7.3410:mRNA-p1	Tb927.7.3410	centrin-4	0.968036	-1.07021	0.183673	-0.740184	0.552832	-0.88333	1.23183	-1.93373	1.5737	-2.32706	1.38704	-1.88645	1.31691	-1.74645	0.773396	-0.956725	0.0435876	-0.145367																			N/A	N/A	GO:0005509	calcium ion binding	N/A	N/A	GO:0005813;GO:0005814;GO:0036064;GO:0120120;GO:0120280	bilobe structure;centriole;centrosome;ciliary basal body;ciliary pro-basal body	GO:0005509	calcium ion binding
Tb927.6.3630:mRNA-p1	Tb927.6.3630:mRNA-p1	Tb927.6.3630	Sphingosine-1-phosphate lyase	0.765295	-1.07583	1.79487	-2.13198	0.0902113	0.217923	0.834844	-1.30027	0.554788	-0.718916	0.497602	-1.15831	0.0891909	-0.193842	1.74621	-1.85776	1.17425	-1.20702																			N/A	N/A	GO:0003824;GO:0016831;GO:0030170	carboxy-lyase activity;catalytic activity;pyridoxal phosphate binding	GO:0019752	carboxylic acid metabolic process	GO:0005737;GO:0005739;GO:0005741;GO:0005783	cytoplasm;endoplasmic reticulum;mitochondrial outer membrane;mitochondrion	GO:0008117	sphinganine-1-phosphate aldolase activity
Tb927.9.2900:mRNA-p1	Tb927.9.2900:mRNA-p1	Tb927.9.2900	U3 small nucleolar RNA-associated protein 10, putative	0.959578	-1.07671	1.39226	-1.9896	0.366642	-0.539203	0.327979	-0.576012	0.98502	-2.41444	1.28396	-1.91126	0.541571	-0.74649	1.13723	-1.59645	1.54542	-1.63197																			N/A	N/A	N/A	N/A	N/A	N/A	GO:0005634;GO:0005730;GO:0005819;GO:0030686;GO:0032040;GO:0034455	90S preribosome;nucleolus;nucleus;small-subunit processome;spindle;t-UTP complex	GO:0030515	snoRNA binding
Tb927.10.8530:mRNA-p1;Tb927.10.8520:mRNA-p1;Tb927.10.8510:mRNA-p1;Tb927.10.8500:mRNA-p1;Tb927.10.8490:mRNA-p1;Tb11.v5.0332.1-p1;Tb11.v5.0331.1-p1;Tb11.v5.0333.1-p1	Tb927.10.8530:mRNA-p1;Tb927.10.8520:mRNA-p1;Tb927.10.8510:mRNA-p1;Tb927.10.8500:mRNA-p1;Tb927.10.8490:mRNA-p1;Tb11.v5.0332.1-p1;Tb11.v5.0331.1-p1;Tb11.v5.0333.1-p1	Tb927.10.8530;Tb927.10.8520;Tb927.10.8510;Tb927.10.8500;Tb927.10.8490;Tb11.v5.0332;Tb11.v5.0331;Tb11.v5.0333	THT1 - hexose transporter, putative;THT2A - glucose transporter, putative;THT1 - hexose transporter, putative, fragment;glucose transporter, putative;glucose transporter, putative;glucose transporter, putative;glucose transporter, putative;glucose transporter 2A	0.83522	-1.08428	0.14071	0.320295	0.53123	-0.915085	0.149734	-0.650392	0.0270725	-0.112585	0.00724422	-0.0353944	0.165445	0.504316	1.25142	-1.66955	0.140194	-0.401435																			GO:0016020;GO:0016021	integral component of membrane;membrane	GO:0022857	transmembrane transporter activity	GO:0008643;GO:0055085	carbohydrate transport;transmembrane transport	GO:0005886;GO:0016021;GO:0051286;GO:0120267;N/A	cell tip;integral component of membrane;N/A;pellicular membrane;plasma membrane	GO:0015149;N/A	hexose transmembrane transporter activity;N/A
Tb927.5.940:mRNA-p1;Tb927.11.6730.1-p1	Tb927.5.940:mRNA-p1	Tb927.5.940	NADH-dependent fumarate reductase, putative	1.40287	-1.08496	1.73664	-2.2969	1.14502	-0.977477	1.90469	-1.75584	1.81141	-2.64042	1.7444	-2.12731	1.22213	-2.13385	0.596777	0.420512	0.221006	0.586403																			N/A	N/A	GO:0000104;GO:0016491	oxidoreductase activity;succinate dehydrogenase activity	GO:0055114	obsolete oxidation-reduction process	GO:0005634;GO:0005737;GO:0005783;GO:0036064	ciliary basal body;cytoplasm;endoplasmic reticulum;nucleus	N/A	N/A
Tb927.1.3180:mRNA-p1	Tb927.1.3180:mRNA-p1	Tb927.1.3180	40S ribosomal protein S11, putative	1.02523	-1.08727	0.885407	-1.50871	1.08691	-1.5847	1.10817	-1.62189	0.738393	-1.07991	0.871062	-1.2927	0.390203	-0.601417	0.738715	-0.806442	1.78518	-2.05778																			GO:0005840	ribosome	GO:0003735	structural constituent of ribosome	GO:0006412	translation	GO:0005730;GO:0005737;GO:0005840;GO:0022627	cytoplasm;cytosolic small ribosomal subunit;nucleolus;ribosome	GO:0003735	structural constituent of ribosome
Tb927.3.4970:mRNA-p1	Tb927.3.4970:mRNA-p1	Tb927.3.4970	hypothetical protein, conserved	1.03519	-1.09022	0.669589	-0.985419	0.649358	1.90003	0.854939	-0.884963	1.11421	-1.53268	1.94032	-2.4332	0.561527	-0.675141	1.23045	-1.24829	1.53436	-2.14867																			N/A	N/A	N/A	N/A	N/A	N/A	GO:0005930	axoneme	N/A	N/A
Tb927.7.4180:mRNA-p1	Tb927.7.4180:mRNA-p1	Tb927.7.4180	Fatty acid elongase	0.601122	-1.09348	1.12669	-1.60735	0.844546	-1.0759	0.0833415	-0.146935	0.234173	-0.658959	0.0873225	0.450624	1.58854	2.13713	1.19986	-1.02051	0.000433411	0.000855764																		+	GO:0016021	integral component of membrane	GO:0102336;GO:0102337;GO:0102338;GO:0102756	3-oxo-arachidoyl-CoA synthase activity;3-oxo-cerotoyl-CoA synthase activity;3-oxo-lignoceronyl-CoA synthase activity;very-long-chain 3-ketoacyl-CoA synthase activity	N/A	N/A	GO:0005634;GO:0005635;GO:0005737;GO:0005783;GO:0030176	cytoplasm;endoplasmic reticulum;integral component of endoplasmic reticulum membrane;nuclear envelope;nucleus	GO:0009922	fatty acid elongase activity
Tb927.7.1580:mRNA-p1	Tb927.7.1580:mRNA-p1	Tb927.7.1580	Vps52 / Sac2 family, putative	1.23672	-1.09632	1.239	-1.56856	2.23082	3.35016	1.04057	-1.17327	1.68264	-2.26488	1.1113	-1.62064	1.36849	-1.61594	1.8819	-1.80196	0.805226	-1.48606								+											GO:0005829	cytosol	N/A	N/A	GO:0015031	protein transport	GO:0000938;GO:0005794;GO:0030133	GARP complex;Golgi apparatus;transport vesicle	GO:0019905	syntaxin binding
Tb927.7.2170:mRNA-p1	Tb927.7.2170:mRNA-p1	Tb927.7.2170	Nucleolar protein 168	0.989887	-1.09727	2.0003	-2.66735	1.19631	-2.00022	1.88982	-2.66194	1.58724	-2.64329	1.89441	-2.44	0.972748	-1.20303	0.885407	-1.40392	1.5712	-1.68568																			N/A	N/A	N/A	N/A	N/A	N/A	GO:0005634;GO:0005730;GO:0005819	nucleolus;nucleus;spindle	GO:0003729	mRNA binding
Tb927.9.7690:mRNA-p1	Tb927.9.7690:mRNA-p1	Tb927.9.7690	SUMO-interacting motif-containing protein	1.42967	-1.09732	2.88361	-2.08942	2.22056	-1.37818	2.26947	-1.45231	3.23932	-2.67156	1.0808	-1.68102	3.02015	-2.23472	0.978229	-1.42475	0.0708926	0.174025																			N/A	N/A	GO:0050265	RNA uridylyltransferase activity	N/A	N/A	GO:0005730;GO:0005737;GO:0031499	cytoplasm;nucleolus;TRAMP complex	GO:0004652	polynucleotide adenylyltransferase activity
Tb927.11.3730:mRNA-p1	Tb927.11.3730:mRNA-p1	Tb927.11.3730	leucyl-tRNA synthetase, putative	0.5226	-1.10268	0.36172	-1.06924	0.461799	-1.56503	0.733013	-2.0515	0.128029	-0.615006	0.666261	-2.05047	0.31449	-0.95975	0.423531	-0.971464	0.0857978	0.387224																			N/A	N/A	GO:0000166;GO:0002161;GO:0004812;GO:0004823;GO:0005524	aminoacyl-tRNA editing activity;aminoacyl-tRNA ligase activity;ATP binding;leucine-tRNA ligase activity;nucleotide binding	GO:0006418;GO:0006429	leucyl-tRNA aminoacylation;tRNA aminoacylation for protein translation	GO:0005737	cytoplasm	GO:0004823;GO:0005524	ATP binding;leucine-tRNA ligase activity
Tb927.8.6160:mRNA-p1;Tb927.8.6150:mRNA-p1	Tb927.8.6160:mRNA-p1;Tb927.8.6150:mRNA-p1	Tb927.8.6160;Tb927.8.6150	40S ribosomal protein S8, putative;40S ribosomal protein S8, putative	0.856326	-1.10508	0.380265	-0.468295	0.254708	-0.570374	0.0855184	0.270559	0.711696	-0.495283	0.57163	-3.53809	0.170084	-0.135048	0.638053	-0.491984	2.13894	-2.11023																			GO:0005840	ribosome	GO:0003735	structural constituent of ribosome	GO:0006412	translation	GO:0005730;GO:0005737;GO:0005840;GO:0022627	cytoplasm;cytosolic small ribosomal subunit;nucleolus;ribosome	GO:0003735;GO:0042301	phosphate ion binding;structural constituent of ribosome
Tb927.9.10550:mRNA-p1	Tb927.9.10550:mRNA-p1	Tb927.9.10550	Spindle assembly abnormal protein 6 homolog	1.23352	-1.10564	1.26313	-1.38462	0.430178	-0.573285	1.21221	-1.39956	0.376537	-1.12771	0.15679	-0.464569	0.000588459	0.00100136	1.12012	-1.78739	0.215349	-0.58379																			GO:0005737	cytoplasm	N/A	N/A	N/A	N/A	GO:0036064;GO:0120280	ciliary basal body;ciliary pro-basal body	N/A	N/A
Tb927.8.3240:mRNA-p1	Tb927.8.3240:mRNA-p1	Tb927.8.3240	lathosterol oxidase, putative	0.878349	-1.1103	1.25075	-1.69832	0.313781	-0.435632	0.802042	-1.2592	0.847991	-1.3133	1.32904	1.80095	0.0181138	-0.030544	0.622343	-0.979382	0.229864	-0.280778																+			GO:0016021	integral component of membrane	GO:0005506;GO:0016491;GO:0050046	delta7-sterol 5(6)-desaturase activity;iron ion binding;oxidoreductase activity	GO:0008610;GO:0055114	lipid biosynthetic process;obsolete oxidation-reduction process	GO:0005789;GO:0016020;GO:0016021	endoplasmic reticulum membrane;integral component of membrane;membrane	GO:0000248;GO:0016491	C-5 sterol desaturase activity;oxidoreductase activity
Tb11.v5.0493.1-p1;Tb927.7.3830:mRNA-p1	Tb11.v5.0493.1-p1;Tb927.7.3830:mRNA-p1	Tb11.v5.0493;Tb927.7.3830	kinesin K39, putative;kinesin K39, putative	1.05329	-1.12107	1.14781	1.80552	0.32367	0.698575	1.08578	-1.99901	0.545443	-1.06203	1.16269	-1.97567	0.873983	-1.37648	1.41732	-1.52291	0.0584899	0.326123																			N/A	N/A	GO:0003777;GO:0005524;GO:0008017	ATP binding;microtubule binding;microtubule motor activity	GO:0007018	microtubule-based movement	GO:0005737;GO:0005871;GO:0005874;GO:0005875;N/A	cytoplasm;kinesin complex;microtubule;microtubule associated complex;N/A	GO:0003774;GO:0003777;GO:0005524;GO:0008017;GO:0016887;N/A	ATP binding;ATP hydrolysis activity;cytoskeletal motor activity;microtubule binding;microtubule motor activity;N/A
Tb927.3.4360:mRNA-p1;Tb927.11.6140:mRNA-p1	Tb927.3.4360:mRNA-p1;Tb927.11.6140:mRNA-p1	Tb927.3.4360;Tb927.11.6140	40S ribosomal protein S15A, putative;40S ribosomal protein S15A, putative	3.37996	-1.12575	1.69814	-1.49995	1.7387	-1.73527	0.81379	-0.995991	0.114938	-0.46382	3.63199	-2.66711	0.0789002	0.347911	2.78127	-2.18628	1.56882	-1.58162																			GO:0005840	ribosome	GO:0003735	structural constituent of ribosome	GO:0006412	translation	GO:0000314;GO:0005730;GO:0005737;GO:0022627;GO:0030133	cytoplasm;cytosolic small ribosomal subunit;nucleolus;organellar small ribosomal subunit;transport vesicle	GO:0003735	structural constituent of ribosome
Tb927.11.9470:mRNA-p1	Tb927.11.9470:mRNA-p1	Tb927.11.9470	ADP-ribosylation factor GTPase activating protein, putative	3.18072	-1.133	0.055147	-0.277881	1.27638	-0.8942	1.32819	-2.24305	0.0354307	-0.106169	0.0572165	0.231812	0.46683	-0.214997	2.56577	-0.873845	0.0284331	-0.0733878																			N/A	N/A	GO:0005096	GTPase activator activity	N/A	N/A	GO:0005634;GO:0005654;GO:0005737;GO:0005930;GO:0030133;GO:0097014	axoneme;ciliary plasm;cytoplasm;nucleoplasm;nucleus;transport vesicle	GO:0003677	DNA binding
Tb927.1.5000:mRNA-p1	Tb927.1.5000:mRNA-p1	Tb927.1.5000	hypothetical protein, conserved	0.804952	-1.13371	0.63159	-1.0021	0.957127	-1.62896	0.653932	-1.6078	0.210444	-0.740568	1.21935	-2.61767	0.533735	-0.953612	0.999087	-1.28575	0.509852	1.98691																			N/A	N/A	N/A	N/A	N/A	N/A	GO:0005739	mitochondrion	N/A	N/A
Tb927.5.2060:mRNA-p1	Tb927.5.2060:mRNA-p1	Tb927.5.2060	Cell division cycle 5-like protein	1.39302	-1.13432	0.585191	1.8568	1.4929	1.65557	0.25362	-0.462185	1.11021	-1.59775	0.258721	-0.429335	1.00399	-1.16262	1.78576	-2.16617	1.60233	-1.17518																			N/A	N/A	N/A	N/A	GO:0051301	cell division	GO:0000974;GO:0005634;GO:0005654	nucleoplasm;nucleus;Prp19 complex	N/A	N/A
Tb927.11.6280:mRNA-p1;REV__Tb927.10.5140:mRNA-p1	Tb927.11.6280:mRNA-p1	Tb927.11.6280	pyruvate phosphate dikinase	0.993279	-1.14069	0.0344332	-0.222399	0.420098	-0.337719	0.236758	-0.392097	1.4898	3.27219	0.897302	-1.25417	2.8547	4.06185	0.911326	-1.14259	2.18841	-1.33164													+	+			+	+	N/A	N/A	GO:0003824;GO:0005524;GO:0016301;GO:0016772;GO:0046872;GO:0050242	ATP binding;catalytic activity;kinase activity;metal ion binding;pyruvate, phosphate dikinase activity;transferase activity, transferring phosphorus-containing groups	GO:0006090;GO:0016310	phosphorylation;pyruvate metabolic process	GO:0020015	glycosome	GO:0042301;GO:0050242	phosphate ion binding;pyruvate, phosphate dikinase activity
Tb927.3.3740:mRNA-p1	Tb927.3.3740:mRNA-p1	Tb927.3.3740	Zinc-finger double-stranded RNA-binding, putative	0.645358	-1.14905	0.619827	2.10815	0.605847	1.30735	0.500571	-1.52192	0.81427	-1.67873	1.0723	-2.15419	0.299866	-0.656724	0.356838	-0.579926	0.313942	-0.518248																			N/A	N/A	N/A	N/A	N/A	N/A	GO:0005634;GO:0005654	nucleoplasm;nucleus	GO:0008270	zinc ion binding
Tb927.11.16810:mRNA-p1	Tb927.11.16810:mRNA-p1	Tb927.11.16810	dynein light intermediate chain D1bLIC, putative	0.590681	-1.15104	0.296704	-0.747334	0.785486	-0.594762	0.427037	-0.892202	0.938556	-1.1015	1.65196	-1.61353	1.20655	-1.83944	1.38306	-1.05965	0.220753	-0.49559																			GO:0005868;GO:0005874	cytoplasmic dynein complex;microtubule	N/A	N/A	GO:0035721;GO:0035735	intraciliary retrograde transport;intraciliary transport involved in cilium assembly	GO:0005868;GO:0005930;GO:0030990;GO:0036064	axoneme;ciliary basal body;cytoplasmic dynein complex;intraciliary transport particle	GO:0045504	dynein heavy chain binding
Tb927.11.6210:mRNA-p1	Tb927.11.6210:mRNA-p1	Tb927.11.6210	Lanosterol 14-alpha demethylase	0.831526	-1.15219	0.816168	-1.31019	0.818948	-1.32989	0.648309	-1.52922	0.148385	-0.543406	0.645629	-1.47891	1.01559	1.92416	1.27787	-1.42384	0.535362	-0.835677																			N/A	N/A	GO:0004497;GO:0005506;GO:0008168;GO:0016705;GO:0020037	heme binding;iron ion binding;methyltransferase activity;monooxygenase activity;oxidoreductase activity, acting on paired donors, with incorporation or reduction of molecular oxygen	GO:0032259;GO:0055114	methylation;obsolete oxidation-reduction process	GO:0005635;GO:0005783	endoplasmic reticulum;nuclear envelope	GO:0004497;GO:0008398;GO:0016491;GO:0020037	heme binding;monooxygenase activity;oxidoreductase activity;sterol 14-demethylase activity
Tb927.7.4760:mRNA-p1;Tb11.v5.0159.1-p1	Tb927.7.4760:mRNA-p1;Tb11.v5.0159.1-p1	Tb927.7.4760;Tb11.v5.0159	hypothetical protein, conserved;hypothetical protein, conserved	1.09265	-1.15539	1.06213	-1.21917	0.202704	-0.270794	0.598142	-1.03984	1.46364	-2.47202	2.91098	7.2811	2.1246	3.41204	1.15703	-1.07692	0.991878	-1.26577															+	+		+	GO:0016021;N/A	integral component of membrane;N/A	N/A	N/A	N/A	N/A	GO:0005634;GO:0005635;GO:0005643;GO:0005794;GO:0031965;N/A	Golgi apparatus;N/A;nuclear envelope;nuclear membrane;nuclear pore;nucleus	N/A	N/A
Tb927.10.9920:mRNA-p1	Tb927.10.9920:mRNA-p1	Tb927.10.9920	hypothetical protein, conserved	1.29758	-1.15949	0.213072	-0.283738	0.771233	-0.764363	0.596369	-0.9624	1.81004	-1.76896	0.10253	-0.116515	1.08487	-0.961036	0.901668	-0.928905	0.444985	-0.618916																			N/A	N/A	GO:0005515	protein binding	N/A	N/A	GO:0005634;GO:0005654;GO:0005730;GO:0005737;GO:0032040;GO:0034388	cytoplasm;nucleolus;nucleoplasm;nucleus;Pwp2p-containing subcomplex of 90S preribosome;small-subunit processome	N/A	N/A
Tb927.5.600:mRNA-p1	Tb927.5.600:mRNA-p1	Tb927.5.600	hypothetical protein, conserved	0.347084	-1.16584	1.0605	-3.15539	0.688515	-2.18038	0.571254	-1.78545	0.714199	-2.14297	1.18217	-3.53867	0.77561	-2.29617	0.336576	-1.43909	0.842711	-1.95537																			N/A	N/A	N/A	N/A	N/A	N/A	GO:0005730	nucleolus	N/A	N/A
Tb927.9.12070:mRNA-p1	Tb927.9.12070:mRNA-p1	Tb927.9.12070	hypothetical protein, conserved	0.612922	-1.16591	0.466333	-1.24616	0.039957	-0.132193	0.00576856	0.0215775	0.738728	-1.97576	0.327832	-0.960961	0.269253	-0.782665	0.638639	-1.21559	0.793167	3.44533																			N/A	N/A	N/A	N/A	N/A	N/A	GO:0005737;GO:0020022;GO:0051286	acidocalcisome;cell tip;cytoplasm	GO:0003729	mRNA binding
Tb927.3.3320:mRNA-p1;Tb927.3.3310:mRNA-p1	Tb927.3.3320:mRNA-p1;Tb927.3.3310:mRNA-p1	Tb927.3.3320;Tb927.3.3310	60S ribosomal protein L13, putative;60S ribosomal protein L13, putative	0.748009	-1.16716	0.391067	-1.83286	1.14943	-2.76831	0.88887	-2.66168	1.00063	-1.72572	1.0861	-2.12667	1.89383	-3.59309	1.56717	-1.75944	2.0048	-3.31621																			GO:0005840	ribosome	GO:0003735	structural constituent of ribosome	GO:0006412	translation	GO:0005730;GO:0005737;GO:0005840;GO:0022625	cytoplasm;cytosolic large ribosomal subunit;nucleolus;ribosome	GO:0003723;GO:0003735	RNA binding;structural constituent of ribosome
Tb927.7.2980:mRNA-p1;Tb927.7.3020:mRNA-p1	Tb927.7.2980:mRNA-p1;Tb927.7.3020:mRNA-p1	Tb927.7.2980;Tb927.7.3020	Nitroreductase family, putative;Nitroreductase family, putative	0.858193	-1.17239	0.0273192	-0.0921965	1.18363	-1.67356	0.813413	-1.71859	0.4424	0.689153	0.723267	-0.975976	0.556609	0.763913	0.119997	0.308566	0.0455526	-0.172614																			N/A	N/A	GO:0016491;GO:0016657	oxidoreductase activity;oxidoreductase activity, acting on NAD(P)H, nitrogenous group as acceptor	GO:0034599	cellular response to oxidative stress	GO:0005737;GO:0097014	ciliary plasm;cytoplasm	GO:0016657	oxidoreductase activity, acting on NAD(P)H, nitrogenous group as acceptor
Tb927.6.600:mRNA-p1	Tb927.6.600:mRNA-p1	Tb927.6.600	CCR4-associated factor 1	1.24402	-1.1803	1.46026	-1.60402	0.41798	-0.523298	0.283734	-0.646808	0.242492	-0.630687	0.17718	-0.633901	0.0465237	-0.153016	0.225405	0.272752	0.483468	1.74044																			GO:0030014	CCR4-NOT complex	GO:0003676;GO:0004535	nucleic acid binding;poly(A)-specific ribonuclease activity	N/A	N/A	GO:0000932;GO:0005654;GO:0005737;GO:0010494;GO:0030015	CCR4-NOT core complex;cytoplasm;cytoplasmic stress granule;nucleoplasm;P-body	GO:0004535;GO:0008143	poly(A) binding;poly(A)-specific ribonuclease activity
Tb927.11.970:mRNA-p1	Tb927.11.970:mRNA-p1	Tb927.11.970	hypothetical protein, conserved	0.783449	-1.18091	1.44384	-1.78528	0.760777	-0.936077	0.94925	-1.513	0.330324	-0.935329	1.42372	-2.3654	1.20612	-1.49767	2.29438	-2.11328	2.01086	-1.56957																			N/A	N/A	N/A	N/A	N/A	N/A	GO:0005634;GO:0005643	nuclear pore;nucleus	N/A	N/A
Tb927.10.9780:mRNA-p1;Tb927.10.10380:mRNA-p1	Tb927.10.9780:mRNA-p1	Tb927.10.9780	ATP-dependent DEAD/H RNA helicase, putative	0.663344	-1.18575	1.29498	-3.05458	1.3543	-2.64995	1.08125	-2.26571	1.69205	-3.43926	1.61837	-3.4514	1.23712	-2.79422	0.166883	-0.37183	1.43681	-2.33434																			N/A	N/A	GO:0003676;GO:0004386;GO:0005524	ATP binding;helicase activity;nucleic acid binding	N/A	N/A	GO:0005634;GO:0005730	nucleolus;nucleus	GO:0004386;GO:0005524	ATP binding;helicase activity
Tb927.11.4420:mRNA-p1	Tb927.11.4420:mRNA-p1	Tb927.11.4420	hypothetical protein, conserved	0.699672	-1.18592	0.959617	-2.35193	0.521433	-0.881515	0.422954	-0.939633	1.4255	-2.72668	1.03409	-1.71833	0.875083	-1.44529	0.749667	-0.898092	0.255371	0.656758																			N/A	N/A	N/A	N/A	N/A	N/A	GO:0005929;GO:0005930	axoneme;cilium	N/A	N/A
Tb927.10.310:mRNA-p1	Tb927.10.310:mRNA-p1	Tb927.10.310	pumillio/PUF RNA binding protein 3	1.08021	-1.18688	0.0800243	0.340845	0.489607	-1.17009	0.935036	-1.73321	0.0838354	-0.20136	0.969014	-1.43399	0.563807	-1.13923	0.797613	-1.08963	0.215903	0.698641																			N/A	N/A	GO:0003723	RNA binding	N/A	N/A	GO:0005730;GO:0005737;GO:0005829	cytoplasm;cytosol;nucleolus	GO:0003723;GO:0003729	mRNA binding;RNA binding
Tb927.7.3780:mRNA-p1	Tb927.7.3780:mRNA-p1	Tb927.7.3780	Nuclear poly(A) polymerase 2	0.693407	-1.19061	0.166147	-0.871477	0.964161	-1.36201	0.664253	-1.48077	1.2602	-2.14752	1.76523	-2.32851	1.1186	-1.78539	1.1868	-1.36937	0.680536	-0.978096																			GO:0005634	nucleus	GO:0003723;GO:0004652;GO:0005524;GO:0016779;GO:0046872;GO:0050265	ATP binding;metal ion binding;nucleotidyltransferase activity;polynucleotide adenylyltransferase activity;RNA binding;RNA uridylyltransferase activity	GO:0031123;GO:0043631	RNA 3'-end processing;RNA polyadenylation	GO:0005634;GO:0005654	nucleoplasm;nucleus	GO:0004652	polynucleotide adenylyltransferase activity
Tb927.3.1840:mRNA-p1	Tb927.3.1840:mRNA-p1	Tb927.3.1840	3-oxo-5-alpha-steroid 4-dehydrogenase, putative	1.05578	-1.19331	0.35957	0.753685	0.82986	-1.17233	0.422203	-1.52655	0.244574	1.04913	1.38747	-2.50423	2.17061	4.0704	1.39934	-1.844	0.172873	-0.461807																		+	GO:0016021	integral component of membrane	GO:0016627	oxidoreductase activity, acting on the CH-CH group of donors	GO:0006629	lipid metabolic process	GO:0005737;GO:0005741;GO:0005743;GO:0005783;GO:0020015	cytoplasm;endoplasmic reticulum;glycosome;mitochondrial inner membrane;mitochondrial outer membrane	GO:0016491	oxidoreductase activity
Tb927.11.3060:mRNA-p1	Tb927.11.3060:mRNA-p1	Tb927.11.3060	Phosphate transport (Pho88), putative	1.8959	-1.19422	1.24563	-1.72914	1.28016	-0.888379	2.08548	-2.03646	2.47628	-2.63304	3.40362	4.64176	1.53019	-1.33807	3.70313	-2.50954	1.39031	-1.03185															+	+			GO:0005783;GO:0016021	endoplasmic reticulum;integral component of membrane	N/A	N/A	GO:0045047	protein targeting to ER	GO:0005635;GO:0005783	endoplasmic reticulum;nuclear envelope	N/A	N/A
Tb927.8.1720:mRNA-p1	Tb927.8.1720:mRNA-p1	Tb927.8.1720	phosphatidylglycerolphosphate synthase, mitochondrial	1.05078	-1.19497	1.5521	-2.09652	0.784991	-0.999818	0.694361	-1.36095	1.88331	-2.55635	0.969181	1.10033	0.654562	-1.06238	0.305187	-0.758972	1.42692	-1.155																+			N/A	N/A	GO:0003824;GO:0005524;GO:0008444	ATP binding;catalytic activity;CDP-diacylglycerol-glycerol-3-phosphate 3-phosphatidyltransferase activity	GO:0032049	cardiolipin biosynthetic process	GO:0005739;GO:0005783;GO:0016020	endoplasmic reticulum;membrane;mitochondrion	GO:0008444	CDP-diacylglycerol-glycerol-3-phosphate 3-phosphatidyltransferase activity
Tb927.6.5070:mRNA-p1;REV__Tb927.11.2160:mRNA-p1	Tb927.6.5070:mRNA-p1	Tb927.6.5070	hypothetical protein, conserved	0.877956	-1.20231	1.72171	-2.08957	0.569272	-0.853956	1.16746	-1.25761	0.36273	-0.916965	1.66658	-2.10715	0.911831	-1.54023	0.643628	-1.02056	0.842195	2.12475																			N/A	N/A	N/A	N/A	N/A	N/A	GO:0005856;GO:0030863	cortical cytoskeleton;cytoskeleton	N/A	N/A
Tb927.11.6870:mRNA-p1	Tb927.11.6870:mRNA-p1	Tb927.11.6870	14-3-3 protein 2	1.01285	-1.21096	0.461326	-0.753624	0.0299908	-0.0617886	0.161951	-0.428455	0.305623	-1.12947	1.32982	-2.26585	0.33257	-0.573714	0.707116	-0.98779	0.598976	-0.984231																			N/A	N/A	N/A	N/A	N/A	N/A	GO:0005634;GO:0005737;GO:0005929;GO:0016281;GO:0020016;GO:0097014;GO:0097542	ciliary plasm;ciliary pocket;ciliary tip;cilium;cytoplasm;eukaryotic translation initiation factor 4F complex;nucleus	GO:0005515;GO:0045309	protein binding;protein phosphorylated amino acid binding
Tb927.5.1080:mRNA-p1	Tb927.5.1080:mRNA-p1	Tb927.5.1080	RNA-binding protein, putative	0.490584	-1.21193	1.24825	-2.66629	0.538671	-1.27003	0.834157	-2.30206	1.10605	-2.32725	0.755069	-1.66708	0.411268	-1.1706	0.0517788	-0.16132	0.784821	-1.3342																			N/A	N/A	GO:0003676	nucleic acid binding	N/A	N/A	GO:0005634;GO:0005730	nucleolus;nucleus	GO:0003723	RNA binding
Tb927.11.11520:mRNA-p1	Tb927.11.11520:mRNA-p1	Tb927.11.11520	glycosomal membrane protein	0.859038	-1.21277	0.631994	-1.28773	0.838602	-1.60649	0.830918	-1.9189	0.479091	0.947692	1.02334	-2.39241	1.25613	2.4624	1.59638	-2.24092	1.15832	-1.72478																			GO:0005779	integral component of peroxisomal membrane	N/A	N/A	GO:0016559	peroxisome fission	GO:0005778;GO:0005783;GO:0020015;GO:0046860	endoplasmic reticulum;glycosome;glycosome membrane;peroxisomal membrane	N/A	N/A
Tb927.5.4260:mRNA-p1;Tb927.5.4250:mRNA-p1;Tb927.5.4240:mRNA-p1;Tb927.5.4230:mRNA-p1;Tb927.5.4220:mRNA-p1;Tb927.5.4210:mRNA-p1;Tb927.5.4200:mRNA-p1;Tb927.5.4190:mRNA-p1;Tb927.5.4180:mRNA-p1;Tb927.5.4170:mRNA-p1	Tb927.5.4260:mRNA-p1;Tb927.5.4250:mRNA-p1;Tb927.5.4240:mRNA-p1;Tb927.5.4230:mRNA-p1;Tb927.5.4220:mRNA-p1;Tb927.5.4210:mRNA-p1;Tb927.5.4200:mRNA-p1;Tb927.5.4190:mRNA-p1;Tb927.5.4180:mRNA-p1;Tb927.5.4170:mRNA-p1	Tb927.5.4260;Tb927.5.4250;Tb927.5.4240;Tb927.5.4230;Tb927.5.4220;Tb927.5.4210;Tb927.5.4200;Tb927.5.4190;Tb927.5.4180;Tb927.5.4170	histone H4, putative;histone H4, putative;histone H4, putative;histone H4, putative;histone H4, putative;histone H4, putative;histone H4, putative;histone H4, putative;histone H4, putative;histone H4, putative	0.763347	-1.21853	1.21206	3.25557	2.40931	3.61891	2.51944	3.73958	1.97794	2.19694	1.50463	2.80552	0.601854	1.05514	1.28221	-0.824884	0.965275	-1.15721								+				+	+	+		+			GO:0000786	nucleosome	GO:0003677;GO:0046982	DNA binding;protein heterodimerization activity	N/A	N/A	GO:0000786;GO:0005654;GO:0005737;GO:0031981;GO:0035869;GO:0097014	ciliary plasm;ciliary transition zone;cytoplasm;nuclear lumen;nucleoplasm;nucleosome	GO:0003677	DNA binding
Tb927.5.900:mRNA-p1;Tb11.v5.0559.1-p1;Tb927.5.910:mRNA-p1;Tb11.v5.0558.1-p1	Tb927.5.900:mRNA-p1;Tb11.v5.0559.1-p1;Tb927.5.910:mRNA-p1	Tb927.5.900;Tb11.v5.0559;Tb927.5.910	oligosaccharyl transferase subunit, putative;oligosaccharyl transferase subunit, putative;oligosaccharyl transferase subunit, putative	0.981113	-1.22058	0.744286	-1.2654	0.391248	-0.769098	0.862018	-1.4813	1.16977	-2.2252	0.0306837	-0.133687	0.74589	-1.44236	1.22581	-2.07268	0.792895	-0.977187																			GO:0016020;GO:0016021;N/A	integral component of membrane;membrane;N/A	GO:0004576;GO:0004579;GO:0046872;N/A	dolichyl-diphosphooligosaccharide-protein glycotransferase activity;metal ion binding;N/A;oligosaccharyl transferase activity	GO:0006486;N/A	N/A;protein glycosylation	GO:0005635;GO:0005783;GO:0008250;N/A	endoplasmic reticulum;N/A;nuclear envelope;oligosaccharyltransferase complex	N/A	N/A
Tb927.8.1990:mRNA-p1	Tb927.8.1990:mRNA-p1	Tb927.8.1990	peroxidoxin	1.64351	-1.22321	0.0542312	-0.136239	1.70178	-1.3001	0.679876	-0.54772	0.285359	-0.668632	2.50879	-2.94901	2.15582	1.58925	1.87529	-1.75157	0.735191	-1.23071																		+	N/A	N/A	GO:0016209;GO:0016491;GO:0051920	antioxidant activity;oxidoreductase activity;peroxiredoxin activity	GO:0055114	obsolete oxidation-reduction process	GO:0005739;GO:0005829;GO:0036064	ciliary basal body;cytosol;mitochondrion	GO:0008379;GO:0015042;GO:0033196	thioredoxin peroxidase activity;trypanothione-disulfide reductase activity;tryparedoxin peroxidase activity
Tb927.8.3820:mRNA-p1	Tb927.8.3820:mRNA-p1	Tb927.8.3820	Stress granule protein	0.807437	-1.22654	0.0259491	0.0909939	0.12992	0.314054	0.871368	-1.72096	0.071188	0.272182	0.736623	-1.30048	0.748253	-1.29609	0.891023	-1.27192	0.292076	1.17067																			N/A	N/A	N/A	N/A	N/A	N/A	GO:0005737;GO:0010494	cytoplasm;cytoplasmic stress granule	GO:0005515	protein binding
Tb927.7.4685:mRNA-p1	Tb927.7.4685:mRNA-p1	Tb927.7.4685	unspecified product	1.9498	-1.22795	1.81456	-1.57918	1.6252	-0.71694	0.883012	-1.32443	2.89873	-1.91875	2.81118	-2.17921	1.74885	-0.668791	0.171017	0.480928	0.426119	1.77624																			N/A	N/A	N/A	N/A	N/A	N/A	N/A	N/A	N/A	N/A
Tb927.7.4290:mRNA-p1	Tb927.7.4290:mRNA-p1	Tb927.7.4290	Nuclear distribution protein C homolog	1.36911	-1.2418	0.893196	-1.62117	1.00163	-1.57366	0.676632	-1.4712	1.33621	2.33363	1.78841	-2.88425	1.05083	-1.75498	2.05144	-2.37371	0.199105	0.363057														+					N/A	N/A	N/A	N/A	N/A	N/A	GO:0005654;GO:0005737;GO:0005929;GO:0097014	ciliary plasm;cilium;cytoplasm;nucleoplasm	GO:0051082	unfolded protein binding
Tb927.7.5940:mRNA-p1	Tb927.7.5940:mRNA-p1	Tb927.7.5940	Protein Associated with Differentiation	0.770329	-1.25011	0.277344	-0.54769	0.191901	-0.569782	0.354681	-0.981838	1.23788	-2.24363	0.615066	1.10596	0.0325858	0.0749009	0.518974	-1.01417	0.89377	-1.1703																			GO:0016021	integral component of membrane	GO:0022857	transmembrane transporter activity	GO:0055085	transmembrane transport	GO:0005886;GO:0016020;GO:0020016;GO:0030133;GO:0120267	ciliary pocket;membrane;pellicular membrane;plasma membrane;transport vesicle	N/A	N/A
Tb927.5.1090:mRNA-p1	Tb927.5.1090:mRNA-p1	Tb927.5.1090	threonyl-tRNA synthetase, putative	1.36755	-1.25301	1.38168	-1.89516	1.00737	-1.2405	1.34132	-1.80752	0.00793426	-0.0192175	0.902995	-1.37809	0.232263	-0.316765	1.31871	-1.46334	0.835877	1.14911																			GO:0005737	cytoplasm	GO:0000166;GO:0004812;GO:0004829;GO:0005524	aminoacyl-tRNA ligase activity;ATP binding;nucleotide binding;threonine-tRNA ligase activity	GO:0006418;GO:0006435;GO:0043039	threonyl-tRNA aminoacylation;tRNA aminoacylation;tRNA aminoacylation for protein translation	GO:0005737;GO:0005739	cytoplasm;mitochondrion	GO:0004812;GO:0004829	aminoacyl-tRNA ligase activity;threonine-tRNA ligase activity
Tb927.3.3160:mRNA-p1	Tb927.3.3160:mRNA-p1	Tb927.3.3160	Nuclear poly(A) polymerase 1	1.11343	-1.25351	0.218148	0.712093	0.00531993	0.0199207	0.119124	-0.255131	0.816636	-1.98753	0.767105	-1.20703	0.350619	-0.911059	0.576609	-0.729111	1.64241	-1.90851																			N/A	N/A	GO:0003723;GO:0004652;GO:0005524;GO:0016779;GO:0050265	ATP binding;nucleotidyltransferase activity;polynucleotide adenylyltransferase activity;RNA binding;RNA uridylyltransferase activity	GO:0031123;GO:0043631	RNA 3'-end processing;RNA polyadenylation	GO:0000776;GO:0005634;GO:0005654;GO:0005730;GO:0005737	cytoplasm;kinetochore;nucleolus;nucleoplasm;nucleus	GO:0003676;GO:0003729;GO:0004652	mRNA binding;nucleic acid binding;polynucleotide adenylyltransferase activity
Tb927.11.6200:mRNA-p1;Tb927.11.6180:mRNA-p1	Tb927.11.6200:mRNA-p1;Tb927.11.6180:mRNA-p1	Tb927.11.6200;Tb927.11.6180	60S ribosomal protein L28, putative;60S ribosomal protein L28, putative	0.652262	-1.25425	1.80936	-5.71052	0.751644	-2.85177	1.8943	-5.95954	1.23306	-4.71556	1.88381	-5.82208	1.79929	-5.4739	0.0709052	-0.173339	1.09374	-3.73598																			GO:0005840	ribosome	GO:0003735	structural constituent of ribosome	GO:0006412	translation	GO:0005737;GO:0005840;GO:0022625	cytoplasm;cytosolic large ribosomal subunit;ribosome	GO:0003729;GO:0003735	mRNA binding;structural constituent of ribosome
Tb927.8.3020:mRNA-p1	Tb927.8.3020:mRNA-p1	Tb927.8.3020	hypothetical protein, conserved	0.943511	-1.2596	0.029888	-0.101716	0.499133	-0.746848	1.0907	-1.29546	0.2942	0.964297	0.0318195	0.182428	0.848303	-1.00189	0.787688	-1.43016	1.08192	-1.13206																			N/A	N/A	GO:0004386	helicase activity	N/A	N/A	GO:0005737;GO:0097014	ciliary plasm;cytoplasm	N/A	N/A
Tb11.v5.0394.1-p1;Tb927.10.15750:mRNA-p1	Tb11.v5.0394.1-p1;Tb927.10.15750:mRNA-p1	Tb11.v5.0394;Tb927.10.15750	hypothetical protein, conserved;Tripartite attachment complex protein 197	1.79647	-1.2609	2.6554	-0.960397	0.0791788	0.0926952	0.958961	-1.0365	0.135907	-0.455009	2.90088	-0.918263	0.212363	-0.654432	0.88568	-1.53958	2.47954	-0.973349																			N/A	N/A	N/A	N/A	N/A	N/A	GO:0036064;GO:0120121;GO:0120280;N/A	ciliary basal body;ciliary pro-basal body;N/A;tripartite attachment complex	GO:0044877;N/A	N/A;protein-containing complex binding
Tb927.10.2700:mRNA-p1	Tb927.10.2700:mRNA-p1	Tb927.10.2700	predicted WD40 repeat protein	1.44925	-1.26211	1.33596	-1.66689	0.690197	-0.852358	0.794828	-1.14644	1.24801	-1.66939	0.715562	-0.937926	0.997893	-1.14508	1.32069	-1.35402	0.591293	-0.57029																			N/A	N/A	GO:0005515;GO:0034511	protein binding;U3 snoRNA binding	GO:0006364	rRNA processing	GO:0005634;GO:0005730;GO:0032040	nucleolus;nucleus;small-subunit processome	GO:0030515	snoRNA binding
Tb927.9.5520:mRNA-p1	Tb927.9.5520:mRNA-p1	Tb927.9.5520	ubiquitin carboxyl-terminal hydrolase, putative	1.23484	-1.26295	1.95803	-2.14859	0.0388627	0.0811437	1.32399	-1.37384	1.03835	-1.42089	1.391	-2.2522	0.634776	-0.699869	1.84744	-1.86542	0.442038	0.953903																			N/A	N/A	GO:0004843	thiol-dependent deubiquitinase	GO:0006511;GO:0016579	protein deubiquitination;ubiquitin-dependent protein catabolic process	GO:0005737;GO:0031981;GO:0097014	ciliary plasm;cytoplasm;nuclear lumen	GO:0004197	cysteine-type endopeptidase activity
Tb927.11.11690:mRNA-p1	Tb927.11.11690:mRNA-p1	Tb927.11.11690	Vacuolar proton pump subunit B, putative	0.689506	-1.26305	0.011502	0.0849295	0.488343	1.28406	0.447455	-1.39408	0.969455	2.60842	0.529336	1.35674	0.574985	1.43636	0.587336	-1.34353	0.341403	-0.894781														+					GO:0033180	proton-transporting V-type ATPase, V1 domain	GO:0005524;GO:0016787	ATP binding;hydrolase activity	GO:0046034;GO:1902600	ATP metabolic process;proton transmembrane transport	GO:0000331;GO:0005764;GO:0020022;GO:0046611;GO:0055037	acidocalcisome;contractile vacuole;lysosomal proton-transporting V-type ATPase complex;lysosome;recycling endosome	GO:0008553	P-type proton-exporting transporter activity
Tb927.11.9780:mRNA-p1	Tb927.11.9780:mRNA-p1	Tb927.11.9780	Nucleoporin NUP119	2.5024	-1.26549	2.45801	-2.13991	0.568876	-0.394653	0.934861	-1.28719	1.92191	-2.39035	1.84024	-2.63207	3.41294	4.51134	1.79608	-2.34751	1.76948	-1.30248																	+	+	N/A	N/A	N/A	N/A	N/A	N/A	GO:0005634;GO:0005643;GO:0005654;GO:0044611	nuclear pore;nuclear pore inner ring;nucleoplasm;nucleus	N/A	N/A
Tb927.6.2360:mRNA-p1;Tb927.6.2300:mRNA-p1	Tb927.6.2360:mRNA-p1;Tb927.6.2300:mRNA-p1	Tb927.6.2360;Tb927.6.2300	adenosine kinase, putative;adenosine kinase, putative	1.04086	-1.26651	0.00862904	0.0254002	0.423701	-0.859162	0.350084	-0.763309	0.664969	1.24841	0.744437	-1.30943	0.883471	1.40029	1.1675	-1.42971	0.945927	-1.81857																			N/A	N/A	GO:0000166;GO:0004001	adenosine kinase activity;nucleotide binding	GO:0006166;GO:0044209	AMP salvage;purine ribonucleoside salvage	GO:0005634;GO:0005654;GO:0005737;GO:0005829;GO:0020015;GO:0031981;GO:0097014	ciliary plasm;cytoplasm;cytosol;glycosome;nuclear lumen;nucleoplasm;nucleus	GO:0004001	adenosine kinase activity
Tb927.5.2080:mRNA-p1	Tb927.5.2080:mRNA-p1	Tb927.5.2080	GMP reductase	1.00986	-1.26699	1.0719	-1.82526	0.0396502	0.0827583	0.635078	-1.03976	0.300225	-0.796807	1.183	-1.95469	0.471643	0.916489	0.384357	-0.497365	0.79466	-0.961857																			N/A	N/A	GO:0003824;GO:0003938;GO:0016491;GO:0046872	catalytic activity;IMP dehydrogenase activity;metal ion binding;oxidoreductase activity	GO:0006164;GO:0006177;GO:0055114	GMP biosynthetic process;obsolete oxidation-reduction process;purine nucleotide biosynthetic process	GO:0005730;GO:0005737;GO:0020015	cytoplasm;glycosome;nucleolus	GO:0003920;GO:0003938	GMP reductase activity;IMP dehydrogenase activity
Tb927.9.8420:mRNA-p1;Tb927.9.8070:mRNA-p1	Tb927.9.8420:mRNA-p1;Tb927.9.8070:mRNA-p1	Tb927.9.8420;Tb927.9.8070	QM-like protein;QM-like protein	0.467195	-1.27096	0.644599	-2.39753	0.822889	-2.9186	0.782215	-2.64138	0.394816	-1.43022	0.740515	-2.49798	0.120798	-0.491247	0.102611	-0.347354	0.814848	-3.10319																			GO:0005840	ribosome	GO:0003735	structural constituent of ribosome	GO:0006412	translation	GO:0005737;GO:0005840;GO:0022625	cytoplasm;cytosolic large ribosomal subunit;ribosome	GO:0003735	structural constituent of ribosome
Tb927.3.4330:mRNA-p1;Tb927.3.4320:mRNA-p1;Tb927.3.4310:mRNA-p1;Tb927.3.4300:mRNA-p1;Tb927.3.4290:mRNA-p1;Tb11.v5.1055.1-p1	Tb927.3.4330:mRNA-p1;Tb927.3.4320:mRNA-p1;Tb927.3.4310:mRNA-p1;Tb927.3.4300:mRNA-p1;Tb927.3.4290:mRNA-p1;Tb11.v5.1055.1-p1	Tb927.3.4330;Tb927.3.4320;Tb927.3.4310;Tb927.3.4300;Tb927.3.4290;Tb11.v5.1055	73 kDa paraflagellar rod protein, putative;Paraflagellar rod protein 1-1;Paraflagellar rod protein 1-2;Paraflagellar rod protein 1-3;Paraflagellar rod protein 1-4;Paraflagellar rod protein 1-5	1.06365	-1.2732	0.910764	-1.35094	0.164945	-0.333166	0.445467	-0.827602	1.11453	-1.97426	1.11738	-1.70641	0.240195	-0.378956	0.58515	-0.796874	0.612996	-0.888979																			GO:0031514	motile cilium	GO:0005516	calmodulin binding	N/A	N/A	GO:0005737;GO:0005929;GO:0031981;GO:0097014;GO:0097740	ciliary plasm;cilium;cytoplasm;nuclear lumen;paraflagellar rod	N/A	N/A
Tb927.2.2240:mRNA-p1	Tb927.2.2240:mRNA-p1	Tb927.2.2240	exportin-T, putative	1.10096	-1.27499	0.945751	-1.38707	0.431468	-0.651052	0.644054	-1.06393	0.927026	1.62514	0.895111	-1.77322	0.541176	-0.997272	1.44781	-1.51945	0.459641	-0.571377														+					N/A	N/A	GO:0000049	tRNA binding	GO:0006409;GO:0071528	tRNA export from nucleus;tRNA re-export from nucleus	GO:0005634;GO:0005643;GO:0005654;GO:0005737;GO:0016363	cytoplasm;nuclear matrix;nuclear pore;nucleoplasm;nucleus	GO:0000049	tRNA binding
Tb927.8.1500:mRNA-p1	Tb927.8.1500:mRNA-p1	Tb927.8.1500	hypothetical protein, conserved	0.740968	-1.27774	1.72225	-1.84519	1.33982	-1.3078	0.291252	-0.483244	1.24542	-1.01457	0.901664	-1.19506	0.84162	-0.559891	2.37182	-1.77606	0.260112	1.22048																			N/A	N/A	N/A	N/A	N/A	N/A	GO:0005737	cytoplasm	GO:0003729	mRNA binding
Tb927.3.1060:mRNA-p1	Tb927.3.1060:mRNA-p1	Tb927.3.1060	cAMP Response Protein 4	1.75679	-1.27824	0.0292578	0.047348	0.778961	-0.872883	0.788908	-0.642456	2.6518	-2.11036	1.94198	-2.22309	1.8289	-1.30396	1.9022	-0.814599	0.396055	1.04633																			N/A	N/A	N/A	N/A	N/A	N/A	N/A	N/A	N/A	N/A
Tb927.10.8960:mRNA-p1	Tb927.10.8960:mRNA-p1	Tb927.10.8960	hypothetical protein, conserved	0.667479	-1.27962	2.02946	-4.1426	1.11215	-2.01334	1.66299	-3.1072	1.74819	-3.48926	1.32842	-2.43518	1.55473	-2.59771	2.31718	-3.31246	2.10074	-2.77497																			N/A	N/A	N/A	N/A	N/A	N/A	GO:0005730;GO:0140525	antipodal site;nucleolus	N/A	N/A
Tb927.9.9550:mRNA-p1	Tb927.9.9550:mRNA-p1	Tb927.9.9550	EnigmRBP2	0.807564	-1.28021	0.980564	-1.98258	0.603213	-1.28414	0.828643	-1.66266	0.846069	-1.67711	1.26238	2.61745	0.426196	-0.889141	1.69448	2.5206	0.0329201	-0.101597										+						+			N/A	N/A	N/A	N/A	N/A	N/A	GO:0005634;GO:0005635;GO:0005783	endoplasmic reticulum;nuclear envelope;nucleus	GO:0003729	mRNA binding
Tb927.10.7340:mRNA-p1;Tb927.10.7330:mRNA-p1	Tb927.10.7340:mRNA-p1;Tb927.10.7330:mRNA-p1	Tb927.10.7340;Tb927.10.7330	40S ribosomal protein S24E, putative;40S ribosomal protein S24E, putative	1.96031	-1.28109	0.0485181	0.314874	1.15651	-1.15622	0.886631	-1.25294	0.0279415	0.168466	0.16068	0.805017	1.64139	-1.6034	0.0581386	-0.249434	0.854709	-0.594571																			GO:0005840	ribosome	GO:0003735	structural constituent of ribosome	GO:0006412	translation	GO:0005737;GO:0005840	cytoplasm;ribosome	GO:0003735;GO:0042301	phosphate ion binding;structural constituent of ribosome
Tb927.2.2360:mRNA-p1	Tb927.2.2360:mRNA-p1	Tb927.2.2360	Ankyrin repeats (3 copies)/Zinc finger, C3HC4 type (RING finger), putative	0.872649	-1.28482	1.44928	-1.53486	0.129719	-0.219356	1.28395	-1.4133	0.500165	-1.02671	0.0543451	-0.240206	0.407783	1.18906	2.97113	2.73287	0.800158	1.33181									+	+									N/A	N/A	GO:0005515;GO:0016740	protein binding;transferase activity	N/A	N/A	GO:0005737;GO:0030133;GO:0051286;GO:0120119	cell tip;cytoplasm;flagellum attachment zone;transport vesicle	N/A	N/A
Tb927.8.6240:mRNA-p1	Tb927.8.6240:mRNA-p1	Tb927.8.6240	STOP axonemal protein	1.38356	-1.28543	1.43562	-2.0842	0.814918	-0.807776	1.46036	-1.98083	0.346568	-0.957513	1.26801	1.29074	0.0215299	-0.0440302	1.83509	-1.9528	1.01643	-0.945793																+			N/A	N/A	N/A	N/A	N/A	N/A	GO:0005856;GO:0005930	axoneme;cytoskeleton	GO:0008017	microtubule binding
Tb927.8.5580:mRNA-p1	Tb927.8.5580:mRNA-p1	Tb927.8.5580	N-terminal region of Chorein, a TM vesicle-mediated sorter/Integral peroxisomal membrane peroxin, putative	1.25571	-1.28728	0.876731	-1.26627	0.185511	-0.393081	1.16616	-1.2984	1.07886	-1.27666	1.20331	-1.34926	1.27953	-1.47887	0.81503	-1.96096	1.59111	3.22838																			GO:0016021	integral component of membrane	N/A	N/A	N/A	N/A	GO:0005737;GO:0019898	cytoplasm;extrinsic component of membrane	N/A	N/A
Tb927.8.5770:mRNA-p1	Tb927.8.5770:mRNA-p1	Tb927.8.5770	Elongator-like Protein 3a	0.934522	-1.28824	0.821576	-1.79528	1.23911	-1.63459	1.43649	-1.97372	1.49204	-2.5615	1.14807	-1.49469	0.988918	-1.72428	2.09862	3.09337	0.799466	-1.47919										+									N/A	N/A	GO:0000049;GO:0003824;GO:0008080;GO:0046872;GO:0051536;GO:0051539	4 iron, 4 sulfur cluster binding;catalytic activity;iron-sulfur cluster binding;metal ion binding;N-acetyltransferase activity;tRNA binding	N/A	N/A	GO:0005634;GO:0005635;GO:0005730;GO:0005737;GO:0033588;GO:0034399	cytoplasm;elongator holoenzyme complex;nuclear envelope;nuclear periphery;nucleolus;nucleus	GO:0008080	N-acetyltransferase activity
Tb927.4.860:mRNA-p1	Tb927.4.860:mRNA-p1	Tb927.4.860	hypothetical protein, conserved	1.56075	-1.29419	1.29555	-1.59864	1.11229	-1.46579	1.27577	-1.68723	1.92886	-2.51838	1.08455	1.19501	0.92469	-1.6059	1.1808	-1.56865	1.00654	-1.10903																+			GO:0016021	integral component of membrane	N/A	N/A	N/A	N/A	GO:0020022	acidocalcisome	N/A	N/A
Tb927.9.10310:mRNA-p1	Tb927.9.10310:mRNA-p1	Tb927.9.10310	mitochondrial carrier protein 11	0.956028	-1.29982	0.0703595	0.24443	0.0135039	0.0364962	0.443731	-1.28026	0.0426358	-0.216692	0.849145	-1.46197	1.3529	2.45138	0.597189	-0.797957	0.27004	-0.43395																			N/A	N/A	N/A	N/A	N/A	N/A	GO:0005737;GO:0005739;GO:0005743;GO:0020023;GO:0031305	cytoplasm;integral component of mitochondrial inner membrane;kinetoplast;mitochondrial inner membrane;mitochondrion	GO:0005315;GO:0015317;GO:0044877	inorganic phosphate transmembrane transporter activity;phosphate:proton symporter activity;protein-containing complex binding
Tb927.10.12840:mRNA-p1	Tb927.10.12840:mRNA-p1	Tb927.10.12840	mitochondrial carrier protein	1.48447	-1.3001	0.0825357	-0.348408	0.430149	-0.707508	1.51943	-1.85657	1.47972	2.16244	0.290326	-0.904573	1.99547	3.02662	1.84025	-1.77649	1.02382	-1.36717														+				+	GO:0016021	integral component of membrane	N/A	N/A	N/A	N/A	GO:0005654;GO:0005737;GO:0005739;GO:0005743;GO:0016020;GO:0020023;GO:0097014	ciliary plasm;cytoplasm;kinetoplast;membrane;mitochondrial inner membrane;mitochondrion;nucleoplasm	GO:0015116;GO:0015117;GO:0015131;GO:0015140;GO:0015141;GO:0015297;GO:0015556	antiporter activity;C4-dicarboxylate transmembrane transporter activity;malate transmembrane transporter activity;oxaloacetate transmembrane transporter activity;succinate transmembrane transporter activity;sulfate transmembrane transporter activity;thiosulfate transmembrane transporter activity
Tb927.7.4960:mRNA-p1;Tb11.v5.0177.1-p1	Tb927.7.4960:mRNA-p1;Tb11.v5.0177.1-p1	Tb927.7.4960;Tb11.v5.0177	hypothetical protein, conserved;hypothetical protein, conserved	1.27878	-1.30018	0.198264	-0.474053	1.69132	-1.49985	1.79566	-1.70923	1.91675	-2.45915	1.87326	-2.67907	0.72106	-0.84843	2.3655	-2.22347	1.60177	-1.41776																			N/A	N/A	N/A	N/A	N/A	N/A	GO:0005634	nucleus	N/A	N/A
Tb927.10.14930:mRNA-p1	Tb927.10.14930:mRNA-p1	Tb927.10.14930	Zinc finger CCCH domain-containing protein 39	1.49737	-1.3062	0.443447	-1.09337	0.86821	-0.825779	1.16928	-1.61855	1.6541	-2.50349	1.5038	-1.83885	0.0566367	-0.149156	1.21706	-1.10198	1.92798	-1.47489																			N/A	N/A	GO:0046872	metal ion binding	N/A	N/A	GO:0005737;GO:0020022	acidocalcisome;cytoplasm	GO:0003723;GO:0003729	mRNA binding;RNA binding
Tb927.9.5440:mRNA-p1	Tb927.9.5440:mRNA-p1	Tb927.9.5440	actin, putative	0.765868	-1.30878	0.823888	-2.10167	0.233531	-0.510662	0.511582	-1.08008	0.607869	-1.18872	1.31724	-2.39248	0.398809	-0.815905	0.0702667	0.262737	0.294662	0.911846																			N/A	N/A	N/A	N/A	N/A	N/A	GO:0005737;GO:0005885;GO:0015629;GO:0097740	actin cytoskeleton;Arp2/3 protein complex;cytoplasm;paraflagellar rod	GO:0005200	structural constituent of cytoskeleton
Tb927.4.5180:mRNA-p1	Tb927.4.5180:mRNA-p1	Tb927.4.5180	tousled-like kinase I	2.25213	-1.31355	0.720175	1.89578	2.161	2.26843	1.18221	-1.8034	1.39416	-1.22035	0.662507	-0.403722	2.3739	-2.07737	2.05447	-1.58833	1.26006	-1.20451																			N/A	N/A	GO:0004672;GO:0005524	ATP binding;protein kinase activity	GO:0006468	protein phosphorylation	GO:0000922;GO:0005634;GO:0005654	nucleoplasm;nucleus;spindle pole	GO:0004674;GO:0005515;GO:0005524	ATP binding;protein binding;protein serine/threonine kinase activity
Tb927.7.2700:mRNA-p1	Tb927.7.2700:mRNA-p1	Tb927.7.2700	NADH-cytochrome b5 reductase, putative	1.77711	-1.31515	1.19011	-1.17997	1.27093	-1.2323	1.08999	-0.988489	0.408519	-0.672728	1.48637	-2.41703	0.815316	-0.80665	1.50467	-1.85712	0.866132	-1.16659																			N/A	N/A	GO:0016491	oxidoreductase activity	GO:0055114	obsolete oxidation-reduction process	GO:0005739	mitochondrion	GO:0004128;GO:0016491	cytochrome-b5 reductase activity, acting on NAD(P)H;oxidoreductase activity
Tb927.11.9320:mRNA-p1	Tb927.11.9320:mRNA-p1	Tb927.11.9320	hypothetical protein, conserved	0.854686	-1.31645	0.900488	-1.90275	0.442106	-1.08208	0.319255	-0.885807	0.856014	-1.90465	2.21207	6.07391	0.322626	-0.724482	1.2287	-1.84749	0.80583	-1.8098															+	+			N/A	N/A	N/A	N/A	N/A	N/A	GO:0005634;GO:0005643;GO:0005737	cytoplasm;nuclear pore;nucleus	N/A	N/A
Tb927.6.1220:mRNA-p1	Tb927.6.1220:mRNA-p1	Tb927.6.1220	hypothetical protein, conserved	1.04823	-1.3302	2.15097	-1.90908	0.649707	-0.931731	0.771082	0.661105	1.82796	3.06234	1.21968	-0.804658	0.939427	-0.497296	2.14328	-1.54518	1.30202	-1.52608													+	+					N/A	N/A	N/A	N/A	N/A	N/A	GO:0036064;GO:0120260	ciliary basal body;ciliary microtubule quartet	N/A	N/A
Tb927.10.6050:mRNA-p1;Tb11.v5.0198.1-p1;Tb11.v5.0197.1-p1	Tb927.10.6050:mRNA-p1;Tb11.v5.0198.1-p1	Tb927.10.6050;Tb11.v5.0198	clathrin heavy chain, putative;clathrin heavy chain	1.72298	-1.33031	1.32674	-1.5076	0.374453	-0.397025	0.424218	-0.869288	0.156707	-0.316429	1.0998	-1.35599	1.77696	2.18562	1.52504	-1.78035	1.36738	-1.09792																		+	GO:0030130;GO:0030132;GO:0071439	clathrin coat of coated pit;clathrin coat of trans-Golgi network vesicle;clathrin complex	GO:0005198;GO:0005515;GO:0032051	clathrin light chain binding;protein binding;structural molecule activity	GO:0006886;GO:0016192	intracellular protein transport;vesicle-mediated transport	GO:0030133;GO:0051286;GO:0071439;N/A	cell tip;clathrin complex;N/A;transport vesicle	GO:0003729;GO:0032051;N/A	clathrin light chain binding;mRNA binding;N/A
Tb927.9.9210:mRNA-p1;Tb927.11.3000:mRNA-p1	Tb927.9.9210:mRNA-p1;Tb927.11.3000:mRNA-p1	Tb927.9.9210;Tb927.11.3000	60S ribosomal protein L37, putative;60S ribosomal protein L37, putative	0.864301	-1.33105	0.769719	-2.01668	0.705397	-1.49979	0.554818	-1.28535	0.204805	-0.653586	1.31034	-2.65649	0.00235264	0.0111453	1.21496	-1.67383	0.993347	-1.51587																			GO:0005840	ribosome	GO:0003735;GO:0019843;GO:0046872	metal ion binding;rRNA binding;structural constituent of ribosome	GO:0006412	translation	GO:0005730;GO:0005840;GO:0022625	cytosolic large ribosomal subunit;nucleolus;ribosome	GO:0003723;GO:0003735	RNA binding;structural constituent of ribosome
Tb927.11.470:mRNA-p1	Tb927.11.470:mRNA-p1	Tb927.11.470	TFIIB-related factor BRF1	1.34409	-1.3416	0.554449	2.06525	0.969835	0.893329	0.661806	-1.06909	1.53185	-1.209	0.844641	-0.613572	0.686111	-0.581725	2.13557	-1.26643	1.34788	-1.26928																			N/A	N/A	GO:0017025	TBP-class protein binding	GO:0006352;GO:0070897	DNA-templated transcription, initiation;transcription preinitiation complex assembly	GO:0005634;GO:0005654;GO:0005667	nucleoplasm;nucleus;transcription regulator complex	GO:0008134	transcription factor binding
Tb927.8.3840:mRNA-p1;Tb11.v5.0599.1-p1	Tb927.8.3840:mRNA-p1	Tb927.8.3840	hypothetical protein, conserved	1.98227	-1.34424	2.49125	-2.41648	1.56463	-1.36969	1.7625	-2.3438	0.0996554	0.298567	0.55393	-0.767993	1.44437	-2.15981	1.45355	-1.63993	0.713171	-1.28764																			N/A	N/A	N/A	N/A	N/A	N/A	GO:0020015;GO:0020016;GO:0030133;GO:0051286	cell tip;ciliary pocket;glycosome;transport vesicle	N/A	N/A
Tb927.5.3400:mRNA-p1	Tb927.5.3400:mRNA-p1	Tb927.5.3400	calcium-translocating P-type ATPase	1.04963	-1.35139	1.50423	-2.37706	0.450833	-0.750991	0.870332	-1.32948	0.0496362	-0.0936155	1.23333	-1.85976	0.307939	0.492825	1.67604	-1.80886	1.27349	-2.14693																			GO:0016021	integral component of membrane	GO:0000166;GO:0005388;GO:0005524	ATP binding;nucleotide binding;P-type calcium transporter activity	GO:0006816	calcium ion transport	GO:0005634;GO:0005635;GO:0005743;GO:0005783	endoplasmic reticulum;mitochondrial inner membrane;nuclear envelope;nucleus	GO:0005388;GO:0008553;GO:0016887	ATP hydrolysis activity;P-type calcium transporter activity;P-type proton-exporting transporter activity
Tb927.10.9910:mRNA-p1	Tb927.10.9910:mRNA-p1	Tb927.10.9910	PSP1 C-terminal conserved region, putative	2.26589	-1.35198	0.241955	-0.710497	0.390702	-0.407401	0.28188	-0.477345	0.871891	0.624587	0.353475	-0.544246	1.11714	0.801005	1.50937	-1.09651	0.402947	-0.717773																			N/A	N/A	N/A	N/A	N/A	N/A	GO:0005737	cytoplasm	GO:0003729	mRNA binding
Tb927.11.14130:mRNA-p1;Tb927.10.3840:mRNA-p1	Tb927.11.14130:mRNA-p1;Tb927.10.3840:mRNA-p1	Tb927.11.14130;Tb927.10.3840	60S ribosomal protein L18a, putative;ribosomal protein L18, putative	1.0246	-1.35271	0.0775475	0.385564	0.25708	-1.04712	0.156183	-0.314216	1.38037	2.36911	0.488459	-1.78207	1.7973	3.11722	1.70876	-2.22075	1.58865	-2.16203														+				+	GO:0005840	ribosome	GO:0003735	structural constituent of ribosome	GO:0006412	translation	GO:0005730;GO:0005737;GO:0005840;GO:0022625	cytoplasm;cytosolic large ribosomal subunit;nucleolus;ribosome	GO:0003729;GO:0003735	mRNA binding;structural constituent of ribosome
Tb927.2.5910:mRNA-p1;Tb927.10.15120:mRNA-p1	Tb927.2.5910:mRNA-p1;Tb927.10.15120:mRNA-p1	Tb927.2.5910;Tb927.10.15120	40S ribosomal protein S13, putative;40S ribosomal protein S13, putative	0.379709	-1.35869	0.641047	-2.97007	0.497784	-2.24027	0.555261	-2.4692	0.310013	-1.78275	0.461814	-2.09057	0.369879	-1.72045	0.0914989	-0.568062	0.478241	-1.60274																			GO:0005840	ribosome	GO:0003735	structural constituent of ribosome	GO:0006412	translation	GO:0005730;GO:0005737;GO:0022627;GO:0035869	ciliary transition zone;cytoplasm;cytosolic small ribosomal subunit;nucleolus	GO:0003735;GO:0070181	small ribosomal subunit rRNA binding;structural constituent of ribosome
Tb927.10.14550:mRNA-p1	Tb927.10.14550:mRNA-p1	Tb927.10.14550	ATP-dependent RNA helicase HEL67	0.832816	-1.36011	0.649785	-1.78557	0.610136	-1.10207	0.899201	-1.72488	0.664457	1.19425	0.772215	-1.63198	1.42733	2.73668	0.911347	-1.36038	0.874397	-1.24873																			N/A	N/A	GO:0003676;GO:0004386;GO:0005524	ATP binding;helicase activity;nucleic acid binding	N/A	N/A	GO:0005634;GO:0005737;GO:0010494;GO:0034399;GO:0097165	cytoplasm;cytoplasmic stress granule;nuclear periphery;nuclear stress granule;nucleus	GO:0003729;GO:0004386;GO:0005524	ATP binding;helicase activity;mRNA binding
Tb927.10.8170:mRNA-p1	Tb927.10.8170:mRNA-p1	Tb927.10.8170	Nucleoporin NUP144	1.21859	-1.3639	1.62798	-2.90409	0.381246	-0.69028	0.857553	-1.77477	1.08523	-2.06271	2.67861	6.50714	1.83317	3.27677	0.345631	-0.840083	0.901434	-1.1759															+	+		+	GO:0005643	nuclear pore	GO:0017056	structural constituent of nuclear pore	GO:0006913	nucleocytoplasmic transport	GO:0005634;GO:0005643;GO:0044611	nuclear pore;nuclear pore inner ring;nucleus	GO:0017056	structural constituent of nuclear pore
Tb927.8.4330:mRNA-p1	Tb927.8.4330:mRNA-p1	Tb927.8.4330	small GTP-binding protein Rab11	1.33639	-1.36816	1.0278	-1.45506	0.569178	-0.634283	1.06668	-1.40569	1.30514	-1.78024	1.56569	1.68137	0.71026	-0.747873	0.84146	-0.760428	1.37683	-1.61013																+			N/A	N/A	GO:0003924;GO:0005525	GTP binding;GTPase activity	N/A	N/A	GO:0000331;GO:0005768;GO:0012505;GO:0030133	contractile vacuole;endomembrane system;endosome;transport vesicle	GO:0003924;GO:0005525	GTP binding;GTPase activity
Tb927.2.3080:mRNA-p1	Tb927.2.3080:mRNA-p1	Tb927.2.3080	cytochrome b5-dependent oleate desaturase	1.46481	-1.37262	1.02569	-1.3945	0.363847	-0.518979	1.24493	-1.6201	1.21144	-1.5694	3.06416	7.25945	0.628073	0.801771	1.99432	-2.2001	0.994843	-1.70209															+	+			GO:0016021	integral component of membrane	N/A	N/A	GO:0006629	lipid metabolic process	GO:0005635;GO:0005783	endoplasmic reticulum;nuclear envelope	GO:0016491	oxidoreductase activity
Tb927.9.2100:mRNA-p1	Tb927.9.2100:mRNA-p1	Tb927.9.2100	hypothetical protein, conserved	1.15278	-1.38237	0.901075	-1.56076	2.35388	-1.29358	1.73793	-2.40375	2.51978	-2.74439	2.12493	-2.58353	2.90333	-2.26079	1.21192	-1.77187	3.87909	-1.47668																			N/A	N/A	N/A	N/A	N/A	N/A	GO:0005634;GO:0005654;GO:0005739;GO:0031981	mitochondrion;nuclear lumen;nucleoplasm;nucleus	N/A	N/A
Tb927.8.4950:mRNA-p1	Tb927.8.4950:mRNA-p1	Tb927.8.4950	Kinesin Localized to the Ingressing Furrow	1.39317	-1.38543	0.963136	-2.15162	0.397652	-0.613823	0.894368	-1.4116	0.859099	1.26355	0.926529	-1.29327	0.113236	0.269268	0.960638	-1.26223	2.26547	4.41486		+												+					N/A	N/A	GO:0003777;GO:0005524;GO:0008017	ATP binding;microtubule binding;microtubule motor activity	GO:0007018	microtubule-based movement	GO:0005737;GO:0005871;GO:0005874;GO:0005875;GO:0020016;GO:0030863;GO:0032154;GO:0036064;GO:0120119	ciliary basal body;ciliary pocket;cleavage furrow;cortical cytoskeleton;cytoplasm;flagellum attachment zone;kinesin complex;microtubule;microtubule associated complex	GO:0003774;GO:0003777;GO:0005524;GO:0008017;GO:0016887	ATP binding;ATP hydrolysis activity;cytoskeletal motor activity;microtubule binding;microtubule motor activity
Tb927.11.9910:mRNA-p1;Tb11.v5.0354.1-p1;Tb11.v5.0355.1-p1	Tb927.11.9910:mRNA-p1	Tb927.11.9910	Domain of unknown function (DUF3846)/TPR repeat, putative	1.20355	-1.38709	0.933102	-1.46368	0.9574	-1.01896	0.229639	-0.417237	1.85801	2.26036	0.768292	-1.07177	0.723233	-0.700374	1.91537	-1.5592	0.42739	1.21863													+	+					N/A	N/A	GO:0005515	protein binding	N/A	N/A	GO:0005654;GO:0005737;GO:0097014	ciliary plasm;cytoplasm;nucleoplasm	N/A	N/A
Tb927.6.1880:mRNA-p1	Tb927.6.1880:mRNA-p1	Tb927.6.1880	aspartyl-tRNA synthetase, putative	1.54404	-1.38897	1.53275	-2.22889	0.0527049	-0.0798127	1.04155	-1.18886	1.76531	-2.47104	1.84826	-2.22611	0.169211	-0.491611	1.50686	-1.72719	0.10948	-0.169994																			GO:0005737	cytoplasm	GO:0000166;GO:0003676;GO:0004812;GO:0004815;GO:0005524	aminoacyl-tRNA ligase activity;aspartate-tRNA ligase activity;ATP binding;nucleic acid binding;nucleotide binding	GO:0006418;GO:0006422	aspartyl-tRNA aminoacylation;tRNA aminoacylation for protein translation	GO:0005737;GO:0005829;GO:0017101;GO:0097014	aminoacyl-tRNA synthetase multienzyme complex;ciliary plasm;cytoplasm;cytosol	GO:0003723;GO:0004815	aspartate-tRNA ligase activity;RNA binding
Tb927.3.4580:mRNA-p1	Tb927.3.4580:mRNA-p1	Tb927.3.4580	hypothetical protein, conserved	0.770608	-1.389	1.15189	3.3803	0.15606	-0.451025	0.263559	-0.763705	0.866358	-2.15707	0.520997	-1.40708	0.129515	-0.385229	0.680381	-1.35792	0.739846	-1.46312																			N/A	N/A	N/A	N/A	N/A	N/A	GO:0005634;GO:0005643	nuclear pore;nucleus	N/A	N/A
Tb927.7.6360:mRNA-p1	Tb927.7.6360:mRNA-p1	Tb927.7.6360	histone H2A variant Z	1.07435	-1.39209	0.16351	0.663284	0.277176	1.11559	1.23775	-1.33782	1.21578	-2.04012	1.59171	1.94163	0.746505	-1.04457	1.62786	-1.97058	0.828585	-0.992964															+	+			GO:0000786	nucleosome	GO:0003677;GO:0046982	DNA binding;protein heterodimerization activity	N/A	N/A	GO:0005634;GO:0005654	nucleoplasm;nucleus	GO:0003677	DNA binding
Tb927.10.5940:mRNA-p1;Tb927.10.5930:mRNA-p1	Tb927.10.5940:mRNA-p1;Tb927.10.5930:mRNA-p1	Tb927.10.5940;Tb927.10.5930	NEK family Serine/threonine-protein kinase, putative;NEK family Serine/threonine-protein kinase, putative	0.918254	-1.39212	1.68862	-2.4454	1.68535	-2.47499	1.11917	-2.08122	1.7982	-3.00068	1.45935	-2.42293	1.32551	-1.83202	0.159573	-0.584952	0.00574646	0.00949415																			N/A	N/A	GO:0004672;GO:0005524;GO:0106310;GO:0106311	ATP binding;protein kinase activity;protein serine kinase activity;protein threonine kinase activity	GO:0006468	protein phosphorylation	GO:0005737;GO:0031981;GO:0097014	ciliary plasm;cytoplasm;nuclear lumen	GO:0004674;GO:0005524	ATP binding;protein serine/threonine kinase activity
Tb927.11.11590:mRNA-p1	Tb927.11.11590:mRNA-p1	Tb927.11.11590	Eukaryotic translation initiation factor 3 subunit E	1.26724	-1.39615	1.15701	-1.77093	0.908867	-1.43742	0.337333	-1.23362	0.0550683	-0.102044	1.07582	-1.63785	0.409887	-0.897369	1.42993	-1.52806	1.00182	-1.37248																			GO:0005737;GO:0005852;GO:0016282;GO:0033290;GO:0071540	cytoplasm;eukaryotic 43S preinitiation complex;eukaryotic 48S preinitiation complex;eukaryotic translation initiation factor 3 complex;eukaryotic translation initiation factor 3 complex, eIF3e	GO:0003743	translation initiation factor activity	GO:0001732	formation of cytoplasmic translation initiation complex	GO:0005634;GO:0005737;GO:0005852	cytoplasm;eukaryotic translation initiation factor 3 complex;nucleus	GO:0003743	translation initiation factor activity
Tb927.9.14070:mRNA-p1	Tb927.9.14070:mRNA-p1	Tb927.9.14070	short-chain dehydrogenase, putative	1.89375	-1.39947	2.01903	-2.33037	0.380053	-0.44865	0.86401	-1.21982	1.81739	-1.81792	2.06149	1.87173	0.683405	-0.4743	2.66514	-1.34304	0.856316	-0.784434															+	+			N/A	N/A	N/A	N/A	GO:0055114	obsolete oxidation-reduction process	GO:0005737;GO:0005741;GO:0020015	cytoplasm;glycosome;mitochondrial outer membrane	GO:0016491	oxidoreductase activity
Tb927.7.3620:mRNA-p1	Tb927.7.3620:mRNA-p1	Tb927.7.3620	tyrosyl-tRNA synthetase	1.80847	-1.40964	1.46025	-2.08941	1.90438	-2.04152	1.31085	-2.23691	1.36404	-1.73339	1.95274	-3.19141	1.34512	-1.33015	2.0645	-2.03456	0.25294	0.637614																			GO:0005739	mitochondrion	GO:0000166;GO:0004812;GO:0005524	aminoacyl-tRNA ligase activity;ATP binding;nucleotide binding	GO:0006418	tRNA aminoacylation for protein translation	GO:0005737;GO:0005829;GO:0097014	ciliary plasm;cytoplasm;cytosol	GO:0004831	tyrosine-tRNA ligase activity
Tb927.2.5600:mRNA-p1;Tb927.2.5540:mRNA-p1	Tb927.2.5600:mRNA-p1;Tb927.2.5540:mRNA-p1	Tb927.2.5600;Tb927.2.5540	hypothetical protein, conserved;hypothetical protein, conserved	1.00844	-1.4099	0.209633	-0.65829	0.112507	-0.34933	0.476558	-0.836016	1.05575	-1.84175	1.17011	-2.07648	0.620874	-1.02577	1.14882	-1.61644	0.717605	-0.944951																			N/A	N/A	N/A	N/A	N/A	N/A	GO:0005737	cytoplasm	N/A	N/A
Tb927.9.14570:mRNA-p1	Tb927.9.14570:mRNA-p1	Tb927.9.14570	leucine-rich repeat protein (LRRP), putative	1.27458	-1.41032	0.0138655	-0.0369714	3.49916	2.57182	0.456752	-1.54147	2.64811	-1.52931	1.08766	-1.72257	2.34716	-1.81855	1.50797	-1.43921	1.36808	-1.73736							+	+											N/A	N/A	N/A	N/A	N/A	N/A	GO:0005634;GO:0005737;GO:0097014	ciliary plasm;cytoplasm;nucleus	N/A	N/A
Tb927.9.11410:mRNA-p1;Tb927.9.11380:mRNA-p1	Tb927.9.11410:mRNA-p1;Tb927.9.11380:mRNA-p1	Tb927.9.11410;Tb927.9.11380	60S ribosomal protein L23, putative;60S ribosomal protein L23, putative	0.911085	-1.42057	0.59529	-1.8054	0.828412	-2.93834	0.724856	-1.36707	0.0166149	-0.0441354	0.406594	-0.807892	0.341067	0.693744	0.464082	-0.759494	1.36966	-3.19369																			GO:0005840	ribosome	GO:0003735	structural constituent of ribosome	GO:0006412	translation	GO:0005730;GO:0005737;GO:0005840;GO:0022625	cytoplasm;cytosolic large ribosomal subunit;nucleolus;ribosome	GO:0003735;GO:0070180	large ribosomal subunit rRNA binding;structural constituent of ribosome
Tb927.11.2610:mRNA-p1	Tb927.11.2610:mRNA-p1	Tb927.11.2610	hypothetical protein, conserved	1.47299	-1.42065	0.70502	-1.42381	0.527062	-0.756964	0.752466	-0.9816	1.3816	-1.9381	0.47878	-0.81132	0.408574	0.958131	1.09176	-1.39854	0.719648	-1.04365																			N/A	N/A	N/A	N/A	N/A	N/A	GO:0005856;GO:0030863	cortical cytoskeleton;cytoskeleton	N/A	N/A
Tb927.9.4190:mRNA-p1	Tb927.9.4190:mRNA-p1	Tb927.9.4190	fatty acyl CoA syntetase 1	1.21861	-1.4242	1.18502	-1.74118	0.566173	-1.16905	0.364505	-0.833775	0.119361	-0.314483	1.13273	-1.70466	0.0624599	-0.206085	1.53181	-1.72548	0.861846	-1.41567																			N/A	N/A	GO:0102391	decanoate-CoA ligase activity	N/A	N/A	GO:0005737;GO:0005741;GO:0005783;GO:0016020;GO:0020015	cytoplasm;endoplasmic reticulum;glycosome;membrane;mitochondrial outer membrane	GO:0004321;GO:0004467	fatty-acyl-CoA synthase activity;long-chain fatty acid-CoA ligase activity
Tb927.7.2190:mRNA-p1	Tb927.7.2190:mRNA-p1	Tb927.7.2190	translocon-associated protein (TRAP), alpha subunit, putative	0.990344	-1.4312	0.653238	-1.18109	0.692489	-1.19293	0.544733	-0.948938	0.524573	-1.25105	2.39682	5.80613	1.52484	2.68349	0.798315	-1.19565	0.610021	-1.04905															+	+		+	GO:0005789;GO:0016021	endoplasmic reticulum membrane;integral component of membrane	N/A	N/A	N/A	N/A	GO:0005635;GO:0005783	endoplasmic reticulum;nuclear envelope	N/A	N/A
Tb927.3.1010:mRNA-p1	Tb927.3.1010:mRNA-p1	Tb927.3.1010	hypothetical protein, conserved	1.55118	-1.43391	0.945862	-2.29536	0.999056	-1.14668	0.555084	-1.33108	1.72896	-2.38347	1.01992	-1.46417	0.284203	-0.359846	1.93747	-2.06269	0.0893855	-0.296451																			N/A	N/A	N/A	N/A	N/A	N/A	GO:0030863	cortical cytoskeleton	N/A	N/A
Tb927.10.3530:mRNA-p1	Tb927.10.3530:mRNA-p1	Tb927.10.3530	hypothetical protein, conserved	1.87587	-1.43433	1.7887	-2.99967	1.58713	-1.36837	0.999078	-0.969074	1.39701	-1.1562	1.55545	1.43048	1.49755	-1.6074	2.65255	-1.81966	2.20911	-1.51885																+			N/A	N/A	N/A	N/A	N/A	N/A	GO:0005737;GO:0031981;GO:0097014	ciliary plasm;cytoplasm;nuclear lumen	N/A	N/A
Tb927.11.1590:mRNA-p1	Tb927.11.1590:mRNA-p1	Tb927.11.1590	hypothetical protein, conserved	1.15404	-1.43513	0.106319	-0.327629	1.68838	-1.93327	0.277264	-0.93618	1.38722	-1.62586	1.71796	-2.1213	0.892	-1.05105	1.70108	-2.11744	1.52249	-1.39095																			N/A	N/A	N/A	N/A	N/A	N/A	GO:0005654;GO:0005737	cytoplasm;nucleoplasm	N/A	N/A
Tb927.4.1720:mRNA-p1	Tb927.4.1720:mRNA-p1	Tb927.4.1720	Nucleoside diphosphate kinase 3	1.50378	-1.43592	0.0538934	-0.159867	1.23845	-1.43644	1.32475	-1.98933	0.216474	0.232434	1.99353	-2.9975	2.71721	-2.04215	2.93478	-1.89363	0.224772	0.731675																			N/A	N/A	GO:0004550;GO:0005524	ATP binding;nucleoside diphosphate kinase activity	N/A	N/A	GO:0005813;GO:0005930	axoneme;centrosome	N/A	N/A
Tb927.7.5300:mRNA-p1	Tb927.7.5300:mRNA-p1	Tb927.7.5300	C2 domain/Ankyrin repeats (3 copies), putative	1.24676	-1.43906	1.02661	-1.60195	0.796167	-1.23011	0.51437	-1.01299	0.559899	-0.917945	0.698963	-1.68421	0.703671	-1.2355	0.994229	-1.73741	0.403322	-0.687449																			N/A	N/A	GO:0005515	protein binding	N/A	N/A	GO:0035869	ciliary transition zone	N/A	N/A
Tb927.1.1980:mRNA-p1	Tb927.1.1980:mRNA-p1	Tb927.1.1980	protein transport protein YIF1, putative	0.836107	-1.44041	1.38574	-2.51162	0.38447	-0.722446	0.660992	-1.5896	1.31435	-2.51785	0.0571181	-0.124646	0.416444	-0.810874	1.64749	-2.20037	0.679501	-1.16737																			GO:0005789	endoplasmic reticulum membrane	N/A	N/A	GO:0006888;GO:0015031	endoplasmic reticulum to Golgi vesicle-mediated transport;protein transport	GO:0005789;GO:0005793;GO:0030133;GO:0030134;GO:0030173	COPII-coated ER to Golgi transport vesicle;endoplasmic reticulum membrane;endoplasmic reticulum-Golgi intermediate compartment;integral component of Golgi membrane;transport vesicle	N/A	N/A
Tb927.3.5420:mRNA-p1	Tb927.3.5420:mRNA-p1	Tb927.3.5420	protein transport protein Sec24	1.66259	-1.44525	1.90844	-2.12035	0.669784	-0.573067	0.19805	-0.191637	0.0666491	0.21743	0.882502	-1.46091	1.3758	-1.67721	2.21268	-1.91978	0.0718836	-0.272119																			GO:0000139;GO:0030127	COPII vesicle coat;Golgi membrane	GO:0008270	zinc ion binding	GO:0006886;GO:0006888	endoplasmic reticulum to Golgi vesicle-mediated transport;intracellular protein transport	GO:0005794;GO:0030127;GO:0070971	COPII vesicle coat;endoplasmic reticulum exit site;Golgi apparatus	GO:0000149;GO:0005515;GO:0008270	protein binding;SNARE binding;zinc ion binding
Tb927.4.2880:mRNA-p1	Tb927.4.2880:mRNA-p1	Tb927.4.2880	Nucleoporin NUP225	0.584572	-1.44617	0.0365948	0.148065	1.01322	-1.60599	0.769253	-1.16759	0.104268	-0.27486	3.10497	8.03073	3.05352	7.72326	1.74476	-1.98984	0.641744	-0.683756															+	+	+	+	GO:0005643	nuclear pore	N/A	N/A	N/A	N/A	GO:0005634;GO:0005643;GO:0044611	nuclear pore;nuclear pore inner ring;nucleus	N/A	N/A
Tb927.11.7780:mRNA-p1	Tb927.11.7780:mRNA-p1	Tb927.11.7780	Mitochondrial import receptor subunit ATOM46	1.16723	-1.44828	1.03988	-1.12615	0.933695	-1.0108	0.92214	-1.00351	0.399161	0.571835	0.485116	-1.49976	1.28381	1.50826	0.520149	-0.460159	0.733786	-0.612007																			GO:0016021	integral component of membrane	N/A	N/A	N/A	N/A	GO:0005739;GO:0005741;GO:0005742	mitochondrial outer membrane;mitochondrial outer membrane translocase complex;mitochondrion	N/A	N/A
Tb927.11.9940:mRNA-p1	Tb927.11.9940:mRNA-p1	Tb927.11.9940	hypothetical protein, conserved	0.791692	-1.45573	0.438753	-1.25996	0.758025	-1.30099	2.09055	4.71891	1.50148	2.82816	0.779082	-1.67044	0.711418	-1.8022	1.20375	-1.60021	1.41371	-1.82059												+	+	+					N/A	N/A	N/A	N/A	N/A	N/A	N/A	N/A	N/A	N/A
Tb927.8.5290:mRNA-p1	Tb927.8.5290:mRNA-p1	Tb927.8.5290	WW domain containing protein, putative	1.45145	-1.46764	0.987645	-1.14567	0.520132	-0.612038	0.493105	-1.07967	0.462735	-0.709445	1.46466	-2.75003	0.688314	-0.913893	0.462392	-0.807102	0.192968	-0.62211																			N/A	N/A	GO:0005515	protein binding	N/A	N/A	GO:0005737;GO:0030133	cytoplasm;transport vesicle	GO:0061630	ubiquitin protein ligase activity
Tb927.2.5060:mRNA-p1	Tb927.2.5060:mRNA-p1	Tb927.2.5060	GTP binding protein, putative	1.64052	-1.47181	1.76429	-1.70874	0.718525	-1.00619	2.17649	-2.01018	0.336735	-1.1368	1.46422	-1.76937	1.60791	-1.55878	1.16876	-1.43443	1.97061	-1.55867																			N/A	N/A	GO:0005524;GO:0005525;GO:0043022;GO:0043023	ATP binding;GTP binding;ribosomal large subunit binding;ribosome binding	N/A	N/A	GO:0005737	cytoplasm	GO:0016887	ATP hydrolysis activity
Tb927.10.9430:mRNA-p1	Tb927.10.9430:mRNA-p1	Tb927.10.9430	phosphoribosylpyrophosphate synthetase, putative	1.57611	-1.47242	0.132014	-0.253281	0.451777	-0.540055	1.23249	-1.24349	0.645938	-0.978155	1.67415	-1.99529	0.929556	-1.01649	1.49063	-1.29927	1.30032	1.41638																			N/A	N/A	GO:0000287;GO:0004749	magnesium ion binding;ribose phosphate diphosphokinase activity	GO:0009116;GO:0009165	nucleoside metabolic process;nucleotide biosynthetic process	GO:0002189;GO:0005737	cytoplasm;ribose phosphate diphosphokinase complex	GO:0004749;GO:0005524	ATP binding;ribose phosphate diphosphokinase activity
Tb927.10.12890:mRNA-p1	Tb927.10.12890:mRNA-p1	Tb927.10.12890	bifunctional aminoacyl-tRNA synthetase, putative	0.763233	-1.47492	0.664837	-1.85157	0.318505	-0.883897	0.0127478	-0.050821	0.43154	-1.37402	0.774582	-1.98044	0.353088	-0.958361	0.988485	-1.8898	0.192538	-0.644234																			GO:0005737	cytoplasm	GO:0000166;GO:0002161;GO:0004812;GO:0004827;GO:0005524	aminoacyl-tRNA editing activity;aminoacyl-tRNA ligase activity;ATP binding;nucleotide binding;proline-tRNA ligase activity	GO:0006418;GO:0006433	prolyl-tRNA aminoacylation;tRNA aminoacylation for protein translation	GO:0005737;GO:0005739	cytoplasm;mitochondrion	N/A	N/A
Tb927.8.1210:mRNA-p1	Tb927.8.1210:mRNA-p1	Tb927.8.1210	hypothetical protein, conserved	2.69934	-1.48454	2.00629	-1.53179	1.00498	-1.12341	1.33905	-1.08869	1.85448	-1.17979	2.84144	-2.54301	2.02234	-1.48204	2.10972	-1.86997	1.10811	-0.824991																			N/A	N/A	N/A	N/A	N/A	N/A	GO:0030133	transport vesicle	N/A	N/A
Tb927.7.3880:mRNA-p1	Tb927.7.3880:mRNA-p1	Tb927.7.3880	Basal body protein	1.34239	-1.48693	0.118469	-0.323581	0.993086	1.51332	0.579944	-1.04319	0.435372	0.778551	0.664523	-1.18185	0.226878	0.371219	0.234896	-0.488722	1.5995	2.87684																			N/A	N/A	GO:0004672;GO:0005524	ATP binding;protein kinase activity	GO:0006468	protein phosphorylation	GO:0005737;GO:0036064	ciliary basal body;cytoplasm	GO:0004674;GO:0004713;GO:0005524	ATP binding;protein serine/threonine kinase activity;protein tyrosine kinase activity
Tb927.11.6630:mRNA-p1	Tb927.11.6630:mRNA-p1	Tb927.11.6630	3-methylcrotonoyl-CoA carboxylase beta subunit, putative	0.947171	-1.48859	0.710161	-1.4751	0.411059	-0.892178	0.607059	-1.32266	0.989678	-2.07714	1.1601	-2.46922	0.281321	-0.775635	0.634315	-1.79595	0.651902	-1.22318																			N/A	N/A	GO:0016874	ligase activity	N/A	N/A	GO:0005739;GO:1905202	methylcrotonoyl-CoA carboxylase complex;mitochondrion	GO:0004485	methylcrotonoyl-CoA carboxylase activity
Tb927.11.17000:mRNA-p1;Tb11.v5.0404.1-p1	Tb927.11.17000:mRNA-p1;Tb11.v5.0404.1-p1	Tb927.11.17000;Tb11.v5.0404	hypothetical protein, conserved;AIR9-like protein	1.0194	-1.4907	0.754134	-1.69783	0.5698	-1.18297	0.893501	-2.25961	0.649225	1.3773	0.538813	-1.26056	1.17886	2.52905	0.76317	-1.17764	0.859214	1.67419																			N/A	N/A	GO:0005515;N/A	N/A;protein binding	N/A	N/A	GO:0005856;GO:0030863;N/A	cortical cytoskeleton;cytoskeleton;N/A	N/A	N/A
Tb927.6.4300:mRNA-p1;Tb927.6.4280:mRNA-p1	Tb927.6.4300:mRNA-p1;Tb927.6.4280:mRNA-p1	Tb927.6.4300;Tb927.6.4280	glyceraldehyde 3-phosphate dehydrogenase, glycosomal;glyceraldehyde 3-phosphate dehydrogenase, glycosomal	0.840508	-1.49183	0.106436	0.487862	0.0744551	-0.226465	0.141165	-0.398405	1.35682	3.59339	0.104031	-0.315726	1.66128	4.49399	0.544553	-1.0855	1.04878	-1.88169														+				+	N/A	N/A	GO:0016620;GO:0050661;GO:0051287	NAD binding;NADP binding;oxidoreductase activity, acting on the aldehyde or oxo group of donors, NAD or NADP as acceptor	GO:0006006;GO:0055114	glucose metabolic process;obsolete oxidation-reduction process	GO:0005737;GO:0020015	cytoplasm;glycosome	GO:0004365;GO:0042301;GO:0044877	glyceraldehyde-3-phosphate dehydrogenase (NAD+) (phosphorylating) activity;phosphate ion binding;protein-containing complex binding
Tb927.2.5150:mRNA-p1	Tb927.2.5150:mRNA-p1	Tb927.2.5150	TPR-repeat protein, putative	1.12891	-1.49191	0.836371	-0.93844	1.63377	-1.40037	0.650841	-1.42436	0.317242	0.771986	2.14105	-1.88203	0.639304	-0.6806	2.23424	-1.4615	0.767901	2.48185																			N/A	N/A	GO:0005515	protein binding	N/A	N/A	GO:0005737	cytoplasm	N/A	N/A
Tb927.9.1340:mRNA-p1	Tb927.9.1340:mRNA-p1	Tb927.9.1340	Myosin-like protein 2	1.02532	-1.49746	2.80727	4.00522	2.44153	3.6938	1.88556	-2.14113	1.19957	-2.13862	0.885442	-0.763442	1.21714	-1.23711	1.28602	-1.54746	0.742949	-1.09382					+	+		+											N/A	N/A	N/A	N/A	N/A	N/A	GO:0000922;GO:0005634;GO:0005643;GO:0005816;GO:0044615	nuclear pore;nuclear pore nuclear basket;nucleus;spindle pole;spindle pole body	N/A	N/A
Tb927.7.4120:mRNA-p1	Tb927.7.4120:mRNA-p1	Tb927.7.4120	hypothetical protein, conserved	1.09874	-1.51051	1.14695	-2.37304	0.347734	-0.671045	0.336033	-0.847152	0.518885	0.974338	0.96279	-1.75637	0.708656	-1.28474	0.903516	-1.80724	1.45739	3.52788																			N/A	N/A	N/A	N/A	N/A	N/A	GO:0005737;GO:0097014	ciliary plasm;cytoplasm	N/A	N/A
Tb927.5.3120:mRNA-p1	Tb927.5.3120:mRNA-p1	Tb927.5.3120	eukaryotic translation initiation factor 2 beta subunit, putative	1.34632	-1.5139	1.32969	-2.09918	0.754753	-1.14743	0.534479	-0.971244	0.173301	0.299067	1.00201	-1.63591	0.53609	-0.92436	1.60165	-1.74423	0.360952	1.48446																			N/A	N/A	GO:0003743	translation initiation factor activity	GO:0006413	translational initiation	GO:0005730;GO:0005737;GO:0005850	cytoplasm;eukaryotic translation initiation factor 2 complex;nucleolus	GO:0003729;GO:0003743;GO:0031369	mRNA binding;translation initiation factor activity;translation initiation factor binding
Tb927.10.15740:mRNA-p1	Tb927.10.15740:mRNA-p1	Tb927.10.15740	hypothetical protein, conserved	1.04315	-1.51633	0.0364431	0.123621	0.214095	0.518856	0.204956	-0.374422	0.89859	-1.59948	0.771133	-1.32457	0.404742	-0.690466	1.27764	-1.70027	0.514027	-0.916615																			GO:0005840	ribosome	GO:0005515	protein binding	N/A	N/A	GO:0005634;GO:0005654;GO:0005848	mRNA cleavage stimulating factor complex;nucleoplasm;nucleus	N/A	N/A
Tb927.10.5370:mRNA-p1;Tb927.10.5360:mRNA-p1	Tb927.10.5370:mRNA-p1;Tb927.10.5360:mRNA-p1	Tb927.10.5370;Tb927.10.5360	40S ribosomal protein S10, putative;40S ribosomal protein S10, putative	1.74858	-1.5186	0.351728	-0.824696	1.39902	-1.52136	0.116612	-0.517464	0.292085	-1.18466	1.53418	-2.5889	0.22369	-0.54624	2.02014	-2.94305	1.127	-1.77142																			N/A	N/A	N/A	N/A	N/A	N/A	GO:0005737;GO:0022627	cytoplasm;cytosolic small ribosomal subunit	GO:0003723;GO:0003729;GO:0003735;GO:0042301	mRNA binding;phosphate ion binding;RNA binding;structural constituent of ribosome
Tb927.10.6370:mRNA-p1;Tb927.10.220:mRNA-p1	Tb927.10.6370:mRNA-p1;Tb927.10.220:mRNA-p1	Tb927.10.6370;Tb927.10.220	60S ribosomal protein L37a, putative;60S ribosomal proteins L37, putative	0.374318	-1.52817	2.2081	-5.49393	1.95841	-4.93046	1.92164	-4.38618	2.03265	-5.69667	2.18893	-5.50578	1.91386	-5.07162	0.363144	0.580596	0.68043	-2.29859																			GO:0005840	ribosome	GO:0003735	structural constituent of ribosome	GO:0006412	translation	GO:0005730;GO:0005737;GO:0005840	cytoplasm;nucleolus;ribosome	GO:0003735;GO:0008270	structural constituent of ribosome;zinc ion binding
Tb927.5.1580:mRNA-p1	Tb927.5.1580:mRNA-p1	Tb927.5.1580	zinc finger CCCH domain containing protein 13	0.859152	-1.52882	1.13073	-1.74703	0.625629	-1.12633	0.496389	-1.30452	0.935022	1.40095	0.913763	1.36085	0.703069	1.05068	1.5134	-1.98701	0.153559	0.519042														+		+			N/A	N/A	GO:0046872	metal ion binding	N/A	N/A	GO:0005829	cytosol	GO:0003723;GO:0003729	mRNA binding;RNA binding
Tb927.10.2890:mRNA-p1;Tb11.v5.0650.1-p1	Tb927.10.2890:mRNA-p1;Tb11.v5.0650.1-p1	Tb927.10.2890;Tb11.v5.0650	enolase, putative;enolase	1.22873	-1.53212	0.434224	-1.18503	0.996294	-1.612	1.1464	-1.98428	1.53639	2.1897	1.31596	-1.8902	1.48028	-1.91511	0.555202	-0.575006	0.0712141	-0.172512													+	+					GO:0000015	phosphopyruvate hydratase complex	GO:0000287;GO:0004634	magnesium ion binding;phosphopyruvate hydratase activity	GO:0006096	glycolytic process	GO:0000015;GO:0005654;GO:0005737;GO:0005829;GO:0097014	ciliary plasm;cytoplasm;cytosol;nucleoplasm;phosphopyruvate hydratase complex	GO:0000287;GO:0004634	magnesium ion binding;phosphopyruvate hydratase activity
Tb927.6.4960:mRNA-p1	Tb927.6.4960:mRNA-p1	Tb927.6.4960	Zinc finger CCCH domain-containing protein 47	2.15901	-1.53687	1.66684	-1.42179	1.35098	-1.02336	1.55517	-2.10954	0.204748	-0.781068	2.30841	-2.2578	0.25504	-0.589984	1.99647	-1.61599	0.18338	0.74324																			N/A	N/A	GO:0046872	metal ion binding	N/A	N/A	GO:0005737	cytoplasm	GO:0003676;GO:0003723	nucleic acid binding;RNA binding
Tb11.v5.0366.1-p1;Tb927.11.12880:mRNA-p1	Tb11.v5.0366.1-p1	Tb11.v5.0366	hypothetical protein, conserved	0.925809	-1.54131	0.81784	-1.64326	0.266304	-0.616535	0.673625	-1.42322	0.460858	-1.18206	1.20537	-2.2077	0.114774	-0.245336	1.01001	-1.90225	0.640578	2.34639																			N/A	N/A	N/A	N/A	N/A	N/A	N/A	N/A	N/A	N/A
Tb927.9.15190:mRNA-p1	Tb927.9.15190:mRNA-p1	Tb927.9.15190	ribosomal protein L15, putative	0.635156	-1.5432	0.154436	-0.806636	0.345965	-1.13763	0.346158	-1.13775	1.03085	-2.99104	0.318537	0.976	0.389122	-1.32622	0.88915	-2.09625	0.632113	-1.33597																			GO:0005840	ribosome	GO:0003735	structural constituent of ribosome	GO:0006412	translation	GO:0005840	ribosome	GO:0003735	structural constituent of ribosome
Tb927.10.3640:mRNA-p1	Tb927.10.3640:mRNA-p1	Tb927.10.3640	nuclear transmembrane protein, putative	1.38821	-1.54735	1.49936	-2.1554	0.908218	-1.08271	1.33964	-1.60344	1.14906	-1.83426	2.5512	4.17674	0.222312	0.296654	1.47732	-1.81075	0.77749	-1.29577															+	+			GO:0016021	integral component of membrane	N/A	N/A	N/A	N/A	GO:0005634;GO:0005635;GO:0031965;GO:0031981	nuclear envelope;nuclear lumen;nuclear membrane;nucleus	N/A	N/A
Tb927.10.6020:mRNA-p1	Tb927.10.6020:mRNA-p1	Tb927.10.6020	hypothetical protein, conserved	1.59276	-1.551	0.127998	0.665103	1.93305	2.17425	1.57006	-2.03132	1.63564	-1.66462	1.02158	-1.6006	1.54337	-1.54521	1.26153	-2.24014	0.324139	-1.04209																			N/A	N/A	N/A	N/A	N/A	N/A	GO:0005634;GO:0005654	nucleoplasm;nucleus	N/A	N/A
Tb927.10.15080:mRNA-p1	Tb927.10.15080:mRNA-p1	Tb927.10.15080	WD40 Repeat 1	1.2157	-1.55592	1.20506	-1.70757	1.98224	-1.97713	1.63294	-1.73582	1.62248	-2.03156	1.6516	-2.1792	1.98073	-1.87724	1.87751	-1.48847	2.29181	-1.2944																			N/A	N/A	GO:0005515	protein binding	N/A	N/A	GO:0005737;GO:0031461;GO:0036064;GO:0120120	bilobe structure;ciliary basal body;cullin-RING ubiquitin ligase complex;cytoplasm	GO:0005515	protein binding
Tb927.9.14040:mRNA-p1	Tb927.9.14040:mRNA-p1	Tb927.9.14040	short-chain dehydrogenase, putative	1.99839	-1.56194	1.18008	-1.56976	1.49894	-0.765811	1.87208	-1.29429	1.6209	-1.24725	3.235	3.18151	2.00483	-1.35381	2.37923	-1.49387	1.2895	-1.02428															+	+			GO:0016021	integral component of membrane	N/A	N/A	GO:0055114	obsolete oxidation-reduction process	N/A	N/A	GO:0016491	oxidoreductase activity
Tb927.10.6380:mRNA-p1	Tb927.10.6380:mRNA-p1	Tb927.10.6380	ring finger containing protein	0.971564	-1.56734	0.506728	-0.901625	0.723959	-1.24115	0.312598	-0.735333	0.884018	-2.4782	0.255842	0.480577	0.924041	-1.86969	1.57782	-2.26988	0.888379	-1.24866																			N/A	N/A	N/A	N/A	N/A	N/A	N/A	N/A	GO:0008270;GO:0044390;GO:0061630	ubiquitin protein ligase activity;ubiquitin-like protein conjugating enzyme binding;zinc ion binding
Tb927.10.3560:mRNA-p1	Tb927.10.3560:mRNA-p1	Tb927.10.3560	Protein arginine N-methyltransferase 1, prozyme	0.856033	-1.56739	0.0528672	-0.21857	0.600602	-1.16388	0.790224	-1.54798	0.523999	-1.05899	0.647304	-1.2683	0.881871	-2.10453	0.969628	-1.5378	0.522875	-0.738098																			N/A	N/A	N/A	N/A	N/A	N/A	GO:0005737;GO:0035097	cytoplasm;histone methyltransferase complex	GO:0003729;GO:0005515;GO:0008469	histone-arginine N-methyltransferase activity;mRNA binding;protein binding
Tb927.11.9710:mRNA-p1;Tb927.10.13500:mRNA-p1	Tb927.11.9710:mRNA-p1;Tb927.10.13500:mRNA-p1	Tb927.11.9710;Tb927.10.13500	60S ribosomal protein L10a;60S ribosomal protein L10a, putative	0.862277	-1.57608	0.103832	-0.460222	0.395334	-0.802339	0.785325	-1.41903	0.169114	-0.758262	0.801542	-1.52367	0.177891	-0.371427	1.17825	-2.13562	0.853569	-1.48548																			GO:0015934	large ribosomal subunit	GO:0003723;GO:0003735	RNA binding;structural constituent of ribosome	GO:0006412	translation	GO:0005730;GO:0005737;GO:0005840;GO:0015934;GO:0022625	cytoplasm;cytosolic large ribosomal subunit;large ribosomal subunit;nucleolus;ribosome	GO:0003723;GO:0003735;GO:0042301	phosphate ion binding;RNA binding;structural constituent of ribosome
Tb927.3.4120:mRNA-p1	Tb927.3.4120:mRNA-p1	Tb927.3.4120	hypothetical protein, conserved	1.60813	-1.57901	1.11827	-1.90645	0.638883	-0.996443	0.835449	-1.0871	1.80707	-1.74168	1.12314	-1.84918	0.808741	-1.18202	2.50533	3.09903	0.192135	-0.342274									+	+									N/A	N/A	N/A	N/A	N/A	N/A	GO:0005794;GO:0120120	bilobe structure;Golgi apparatus	N/A	N/A
Tb927.3.5310:mRNA-p1	Tb927.3.5310:mRNA-p1	Tb927.3.5310	paraflagellar rod protein	1.13036	-1.5798	1.40584	-2.22863	0.719609	-1.07167	0.406555	-0.879141	0.38724	0.582664	1.14962	-2.46757	0.675181	-1.12721	1.72746	-2.04194	0.193592	0.500588																			N/A	N/A	N/A	N/A	N/A	N/A	GO:0005737;GO:0097740	cytoplasm;paraflagellar rod	N/A	N/A
Tb927.7.1750:mRNA-p1;Tb927.7.1740:mRNA-p1;Tb927.7.1730:mRNA-p1;REV__Tb927.3.3460:mRNA-p1	Tb927.7.1750:mRNA-p1;Tb927.7.1740:mRNA-p1;Tb927.7.1730:mRNA-p1	Tb927.7.1750;Tb927.7.1740;Tb927.7.1730	60S ribosomal protein L7, putative;60S ribosomal protein L7, putative;60S ribosomal protein L7, putative	1.17972	-1.57994	0.296505	-1.29571	1.4583	-1.57199	0.450466	-1.26044	0.208693	-0.799887	2.1115	-2.75295	1.49618	1.697	2.32932	-2.16379	1.99119	-1.7479																			GO:0022625	cytosolic large ribosomal subunit	GO:0003735	structural constituent of ribosome	GO:0000463	maturation of LSU-rRNA from tricistronic rRNA transcript (SSU-rRNA, 5.8S rRNA, LSU-rRNA)	GO:0005730;GO:0005737;GO:0005840;GO:0022625	cytoplasm;cytosolic large ribosomal subunit;nucleolus;ribosome	GO:0003723;GO:0003729;GO:0003735	mRNA binding;RNA binding;structural constituent of ribosome
Tb927.3.3140:mRNA-p1	Tb927.3.3140:mRNA-p1	Tb927.3.3140	hypothetical protein, conserved	1.07925	-1.58451	0.485566	-1.04639	0.302657	-0.681491	0.298178	-0.762778	0.82977	-1.74383	1.41394	3.25224	0.657631	-1.37906	0.666863	-1.13257	0.519755	-0.891272																+			N/A	N/A	N/A	N/A	N/A	N/A	GO:0005737	cytoplasm	N/A	N/A
Tb927.6.4500:mRNA-p1	Tb927.6.4500:mRNA-p1	Tb927.6.4500	conserved repeat domain containing protein, putative	0.847904	-1.59206	0.830162	-1.87964	0.557887	-1.38371	0.696501	-1.59246	1.04426	-2.38318	0.860053	1.96112	0.558098	-1.49748	0.600342	-1.40364	0.723552	-1.19862																+			GO:0016021	integral component of membrane	N/A	N/A	N/A	N/A	GO:0005635;GO:0005783	endoplasmic reticulum;nuclear envelope	N/A	N/A
Tb927.4.3150:mRNA-p1	Tb927.4.3150:mRNA-p1	Tb927.4.3150	KKT-interacting protein 10	1.38123	-1.59278	0.0595789	0.224352	0.902546	-0.897925	0.518085	-1.37568	1.61158	-1.5985	1.05434	-1.16245	1.07033	-1.05822	2.02462	-2.11075	1.66148	-1.55902																			N/A	N/A	N/A	N/A	N/A	N/A	GO:0000776;GO:0005634;GO:0005654;GO:0005739	kinetochore;mitochondrion;nucleoplasm;nucleus	N/A	N/A
Tb927.9.11270:mRNA-p1	Tb927.9.11270:mRNA-p1	Tb927.9.11270	t- complex protein 1 (eta subunit), putative	1.80234	-1.59864	0.215703	0.610245	1.65975	-1.48313	0.908775	-0.743382	1.74825	1.39974	0.579797	-0.656105	0.273728	0.376997	1.34389	-1.2634	0.687187	1.27879													+	+					N/A	N/A	GO:0005524;GO:0051082	ATP binding;unfolded protein binding	GO:0006457	protein folding	GO:0005737;GO:0005832	chaperonin-containing T-complex;cytoplasm	GO:0051082	unfolded protein binding
Tb927.9.10490:mRNA-p1	Tb927.9.10490:mRNA-p1	Tb927.9.10490	Component of motile flagella 56	2.04992	-1.59996	1.07038	-1.07267	1.28573	-1.48236	0.828099	-1.01369	1.57879	-1.74271	0.815774	-1.324	0.51619	-0.522828	1.20657	-1.19066	0.599546	1.98163																			N/A	N/A	N/A	N/A	N/A	N/A	GO:0005737	cytoplasm	N/A	N/A
Tb927.9.13030:mRNA-p1	Tb927.9.13030:mRNA-p1	Tb927.9.13030	QA-SNARE protein putative	1.7364	-1.60038	1.55927	-1.7194	0.823304	-0.843939	1.5502	-2.46525	2.10028	-2.74677	1.31698	-2.33184	1.52697	-1.54155	0.203488	-0.407672	1.59011	-1.72835																			GO:0016020;GO:0031201	membrane;SNARE complex	N/A	N/A	GO:0006886;GO:0016192	intracellular protein transport;vesicle-mediated transport	GO:0012505;GO:0016021;GO:0030133;GO:0031201	endomembrane system;integral component of membrane;SNARE complex;transport vesicle	GO:0000149;GO:0005484	SNAP receptor activity;SNARE binding
Tb927.1.710:mRNA-p1	Tb927.1.710:mRNA-p1	Tb927.1.710	phosphoglycerate kinase	2.11558	-1.60147	0.0872899	-0.170137	0.865155	-1.21608	1.59068	-1.43243	0.000669002	0.00247924	1.64943	-1.69316	0.157867	-0.314199	0.762881	-1.24495	0.420388	-0.449062																			N/A	N/A	GO:0004618	phosphoglycerate kinase activity	GO:0006096	glycolytic process	GO:0005654;GO:0005737;GO:0005829;GO:0097014	ciliary plasm;cytoplasm;cytosol;nucleoplasm	GO:0004618;GO:0005524;GO:0043531	ADP binding;ATP binding;phosphoglycerate kinase activity
Tb927.11.6160:mRNA-p1	Tb927.11.6160:mRNA-p1	Tb927.11.6160	eukaryotic release factor 3, putative	1.59688	-1.60233	2.63863	-1.9387	1.55837	-1.24647	0.703234	-0.660842	2.21223	-2.87596	2.04638	-1.28742	3.75716	-1.96522	1.35505	-1.02919	0.100725	0.288689																			GO:0005829	cytosol	GO:0003924;GO:0005525	GTP binding;GTPase activity	N/A	N/A	GO:0005737;GO:0018444;GO:0097014	ciliary plasm;cytoplasm;translation release factor complex	GO:0003729;GO:0003746;GO:0003747;GO:0003924;GO:0005525	GTP binding;GTPase activity;mRNA binding;translation elongation factor activity;translation release factor activity
Tb927.5.1210:mRNA-p1	Tb927.5.1210:mRNA-p1	Tb927.5.1210	short-chain dehydrogenase, putative	1.61825	-1.62382	0.577243	-1.19064	1.01278	-1.04106	1.82005	-2.29524	1.73855	2.07216	2.52234	3.95799	2.58285	4.138	0.474316	-1.14909	0.754491	-0.754054													+	+	+	+		+	N/A	N/A	N/A	N/A	GO:0055114	obsolete oxidation-reduction process	GO:0005635;GO:0005739;GO:0005743;GO:0005783;GO:0020015	endoplasmic reticulum;glycosome;mitochondrial inner membrane;mitochondrion;nuclear envelope	N/A	N/A
Tb927.7.7430:mRNA-p1;Tb927.7.7420:mRNA-p1	Tb927.7.7430:mRNA-p1;Tb927.7.7420:mRNA-p1	Tb927.7.7430;Tb927.7.7420	ATP synthase F1, alpha subunit;ATP synthase F1, alpha subunit	1.21495	-1.62763	0.191097	-0.71187	1.31091	-2.55089	0.689583	-1.3966	1.40901	-2.84219	1.17601	-2.50648	0.980079	-1.83591	1.36108	-1.9432	1.10712	-1.47541																			GO:0045261	proton-transporting ATP synthase complex, catalytic core F(1)	GO:0005524;GO:0032559;GO:0046933	adenyl ribonucleotide binding;ATP binding;proton-transporting ATP synthase activity, rotational mechanism	GO:0015986	ATP synthesis coupled proton transport	GO:0000275;GO:0005737;GO:0005739;GO:0005743;GO:0005886;GO:0020023;GO:0031981;GO:0045261;GO:0097014	ciliary plasm;cytoplasm;kinetoplast;mitochondrial inner membrane;mitochondrial proton-transporting ATP synthase complex, catalytic sector F(1);mitochondrion;nuclear lumen;plasma membrane;proton-transporting ATP synthase complex, catalytic core F(1)	GO:0005524;GO:0043531;GO:0046933	ADP binding;ATP binding;proton-transporting ATP synthase activity, rotational mechanism
Tb927.9.11540:mRNA-p1	Tb927.9.11540:mRNA-p1	Tb927.9.11540	hypothetical protein, conserved	2.18971	-1.62955	1.57071	-1.32558	1.20198	-1.81064	1.04005	-1.86251	1.03572	-1.9549	0.531758	-0.53961	1.48309	-1.25529	1.34173	-1.42586	0.773944	2.14144																			N/A	N/A	N/A	N/A	N/A	N/A	GO:0005856;GO:0030863;GO:0120119	cortical cytoskeleton;cytoskeleton;flagellum attachment zone	N/A	N/A
Tb927.10.9650:mRNA-p1;Tb11.v5.0399.1-p1	Tb927.10.9650:mRNA-p1;Tb11.v5.0399.1-p1	Tb927.10.9650;Tb11.v5.0399	hypothetical protein, conserved;Nucleoporin NUP152	2.23397	-1.63061	1.00438	-1.59084	0.795306	-0.659623	1.09292	-1.96617	1.51748	-1.6371	1.86271	-1.7682	1.66367	2.11716	1.67438	-1.42121	0.935673	-1.32552																		+	N/A	N/A	N/A	N/A	N/A	N/A	GO:0005634;GO:0005643;GO:0031080;N/A	N/A;nuclear pore;nuclear pore outer ring;nucleus	N/A	N/A
Tb927.11.15450:mRNA-p1	Tb927.11.15450:mRNA-p1	Tb927.11.15450	Basal body protein	1.02995	-1.63095	0.268209	-0.6713	0.177652	0.625344	0.414366	-1.10158	0.53262	1.21233	0.487238	-1.109	0.0710361	0.254082	0.859446	-1.36147	0.334785	-0.598179																			N/A	N/A	N/A	N/A	N/A	N/A	GO:0036064;GO:0120280	ciliary basal body;ciliary pro-basal body	N/A	N/A
[truncated: 75 more rows]
[truncated: 44 more columns]

## Sheet: Table S2B
Protein IDs	Majority protein IDs	Gene IDs	Abbreviation	Product Description	MEX67: -Log(P-value)	MEX67: Difference	NUP110C: -Log(P-value)	NUP110C: Difference	NUP110N -Log(P-value)	NUP110N Difference	NUP76C: -Log(P-value)	NUP76C: Difference	NUP76N -Log(P-value)	NUP76N Difference	NUP96C: -Log(P-value)	NUP96C: Difference	NUP96N -Log(P-value)	NUP96N Difference	NUP158C: -Log(P-value)	NUP158C: Difference	GFP-Control: -Log(P-value)	GFP-Control: Difference	GFP-Control: Significant Class A	GFP-Control: Significant Class B	MEX67: Significant Class A	MEX67: Significant Class B	NUP110C: Significant Class A	NUP110C: Significant Class B	NUP110N Significant Class A	NUP110N Significant Class B	NUP158: Significant Class A	NUP158: Significant Class B	NUP76C: Significant Class A	NUP76C: Significant Class B	NUP76N Significant Class A	NUP76N Significant Class B	NUP96C: Significant Class A	NUP96C: Significant Class B	NUP96N Significant Class A	NUP96N Significant Class B	Computed GO Component IDs	Computed GO Components	Computed GO Function IDs	Computed GO Functions	Computed GO Process IDs	Computed GO Processes	Curated GO Component IDs	Curated GO Components	Curated GO Function IDs
[truncated: 33 more rows]
[truncated: 45 more columns]

[truncated: 2 more sheets: Table S2C, legend]
