# Supplementary figures and images for: Detection of TurboID fusion proteins by fluorescent streptavidin outcompetes antibody signals and visualises targets not accessible to antibodies
Source: eLife journal article supplement (doi:10.7554/elife.95028), 2024-04-03

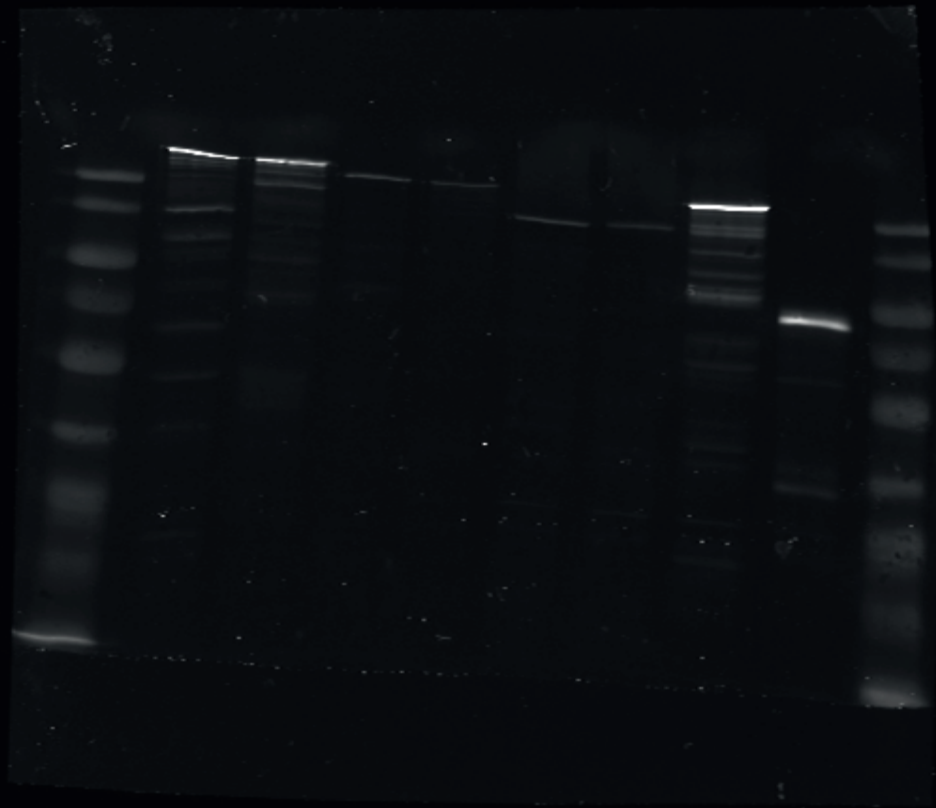

Supplement: fig5-figsupp1-data2 [file Figure 5–figure supplement 1-source data 2. Uncropped and Unabeled gels for Figure 5.Gel2.pdf › eLife.95028.SourceData2.Raw and unedited_gels_for_Figure5_FigureSupplement1/Figure 5–figure supplement 1-source data 2. Uncropped and Unabeled gels for Figure 5.Gel2.pdf]

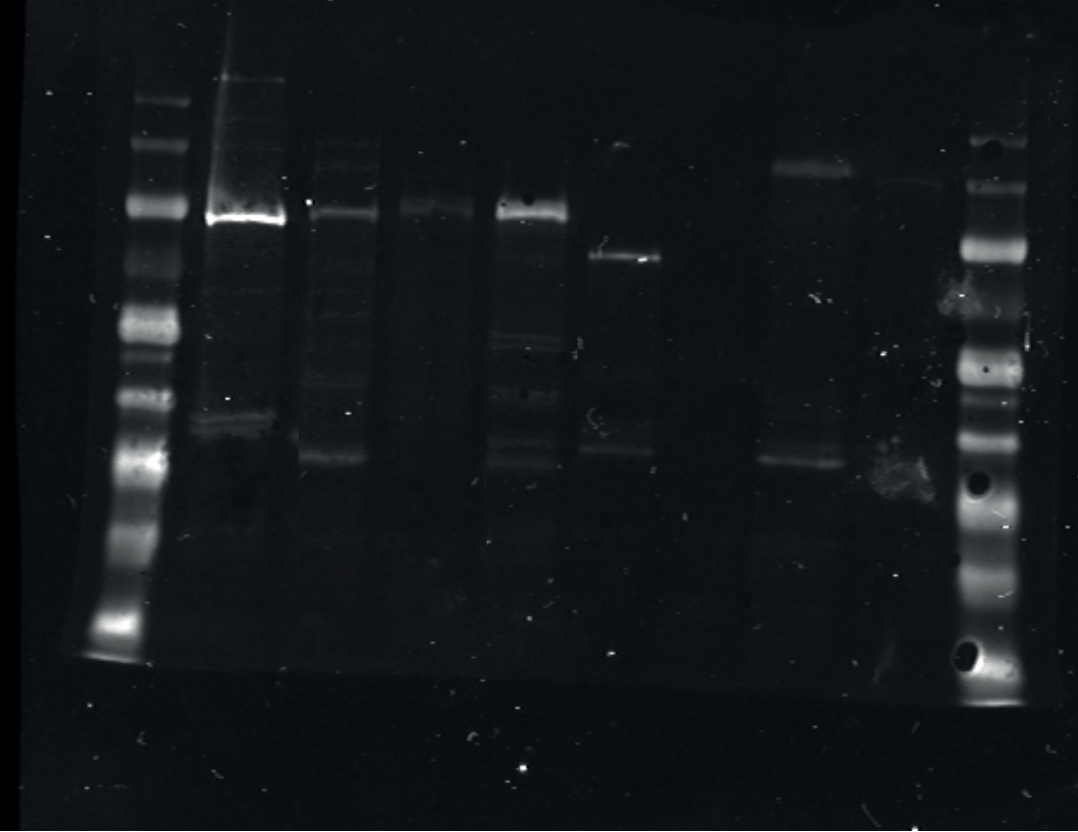

Supplement: fig5-figsupp1-data2 [file Figure 5–figure supplement 1-source data 2. Uncropped and Unabeled gels for Figure 5.Gel3.pdf › eLife.95028.SourceData2.Raw and unedited_gels_for_Figure5_FigureSupplement1/Figure 5–figure supplement 1-source data 2. Uncropped and Unabeled gels for Figure 5.Gel3.pdf]

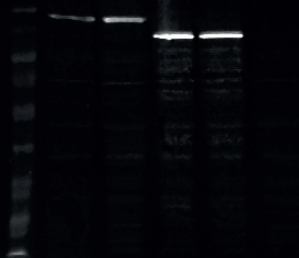

Supplement: fig5-figsupp1-data2 [file Figure 5–figure supplement 1-source data 2. Uncropped and Unlabeled gels for Figure 5.Gel1.pdf › eLife.95028.SourceData2.Raw and unedited_gels_for_Figure5_FigureSupplement1/Figure 5–figure supplement 1-source data 2. Uncropped and Unlabeled gels for Figure 5.Gel1.pdf]

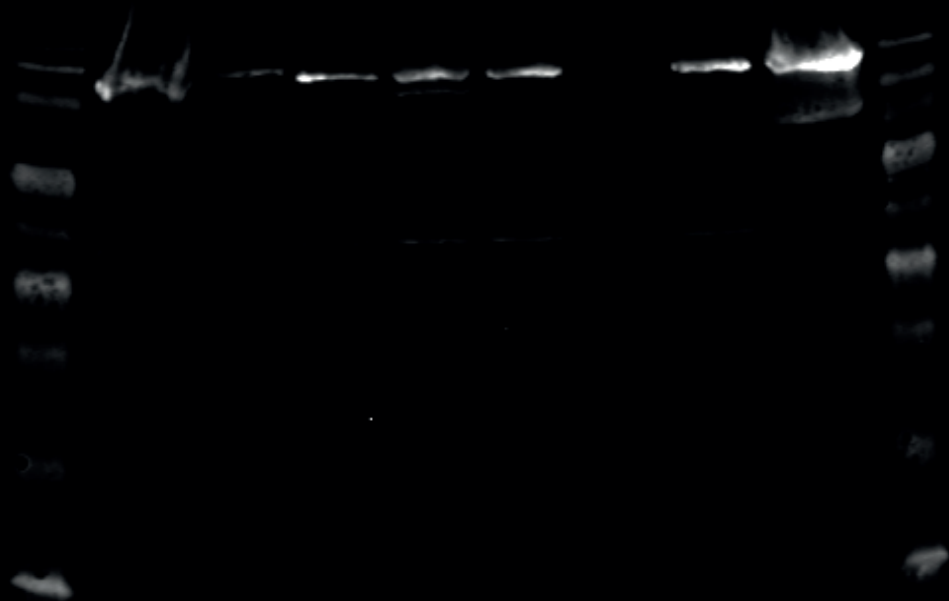

Supplement: fig5-figsupp1-data2 [file Figure 5–figure supplement 1-source data 2. Uncropped and Unlabeled gels for Figure 5.Gel10.pdf › eLife.95028.SourceData2.Raw and unedited_gels_for_Figure5_FigureSupplement1/Figure 5–figure supplement 1-source data 2. Uncropped and Unlabeled gels for Figure 5.Gel10.pdf]

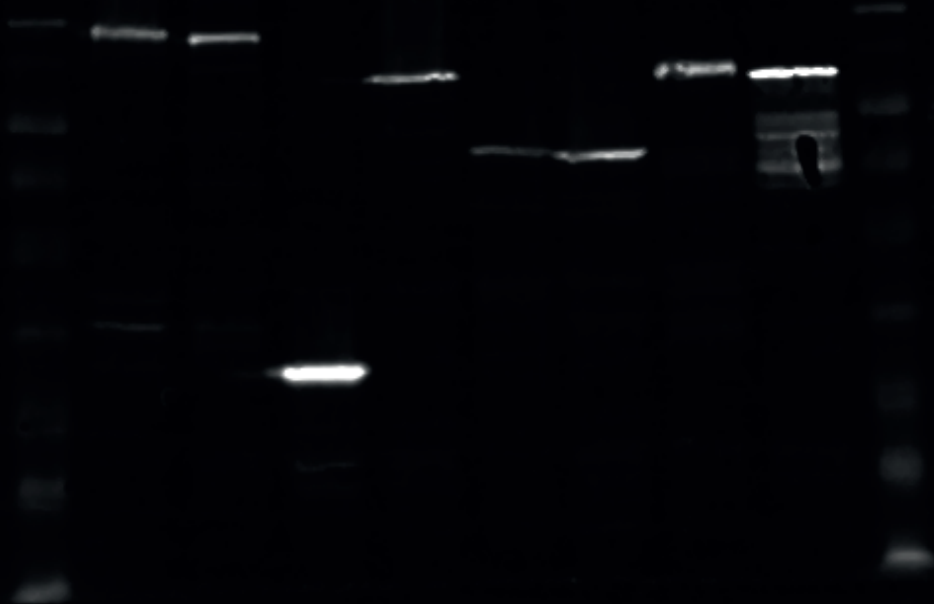

Supplement: fig5-figsupp1-data2 [file Figure 5–figure supplement 1-source data 2. Uncropped and Unlabeled gels for Figure 5.Gel11.pdf › eLife.95028.SourceData2.Raw and unedited_gels_for_Figure5_FigureSupplement1/Figure 5–figure supplement 1-source data 2. Uncropped and Unlabeled gels for Figure 5.Gel11.pdf]

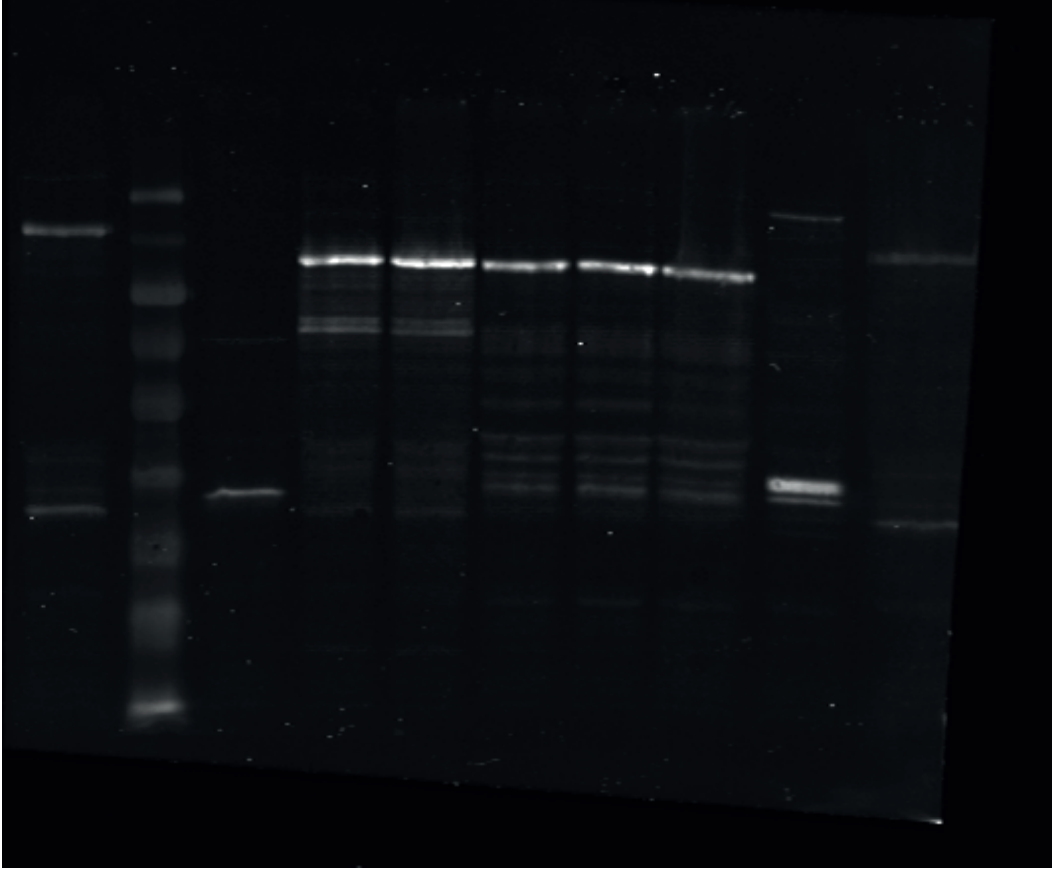

Supplement: fig5-figsupp1-data2 [file Figure 5–figure supplement 1-source data 2. Uncropped and Unlabeled gels for Figure 5.Gel4.pdf › eLife.95028.SourceData2.Raw and unedited_gels_for_Figure5_FigureSupplement1/Figure 5–figure supplement 1-source data 2. Uncropped and Unlabeled gels for Figure 5.Gel4.pdf]

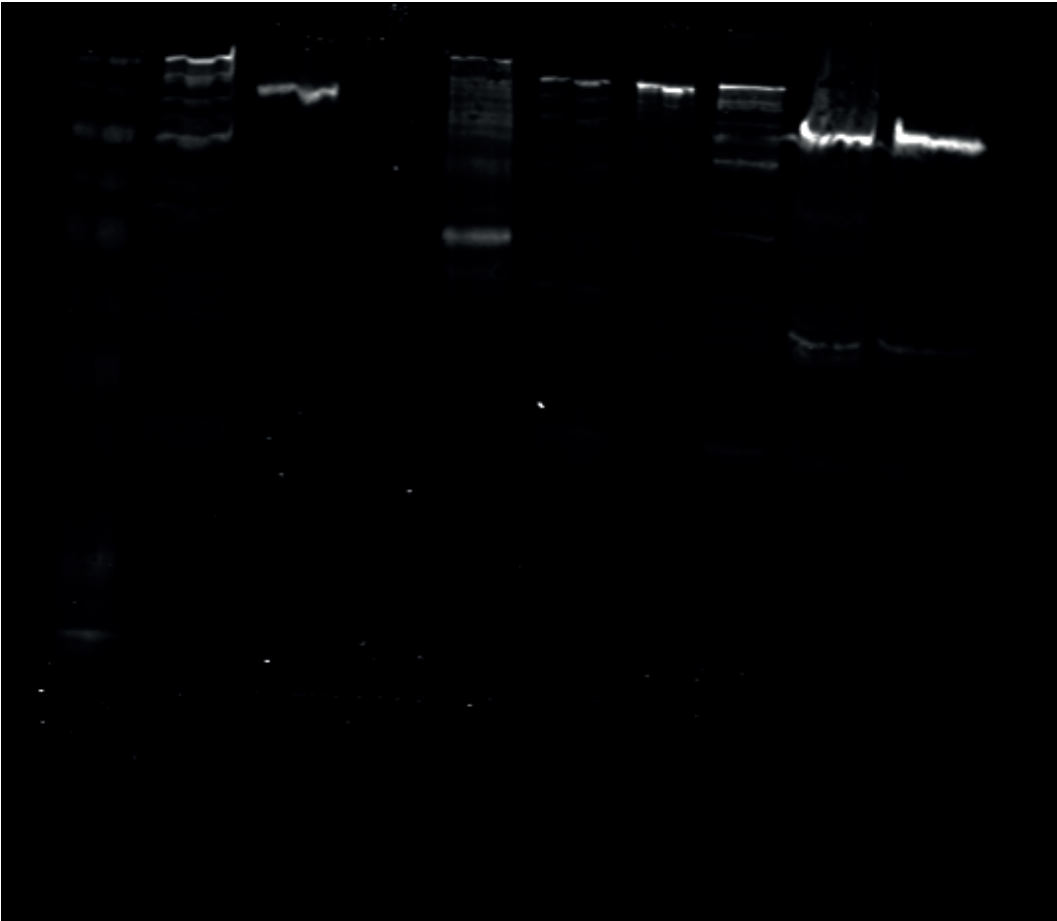

Supplement: fig5-figsupp1-data2 [file Figure 5–figure supplement 1-source data 2. Uncropped and Unlabeled gels for Figure 5.Gel5.pdf › eLife.95028.SourceData2.Raw and unedited_gels_for_Figure5_FigureSupplement1/Figure 5–figure supplement 1-source data 2. Uncropped and Unlabeled gels for Figure 5.Gel5.pdf]

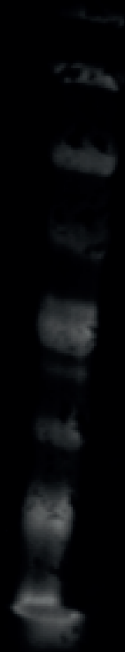

1

2

3

4

5

6

7

8

9

10

11

12

13

14

15

16

17

18

19

20

21

22

23

24

25

26

27

28

29

30

31

32

33

34

35

36

37

38

39

40

41

42

43

44

45

46

47

48

49

50

51

52

53

54

55

56

57

58

59

60

Supplement: fig5-figsupp1-data2 [file Figure 5–figure supplement 1-source data 2. Uncropped and Unlabeled gels for Figure 5.Gel6.pdf › eLife.95028.SourceData2.Raw and unedited_gels_for_Figure5_FigureSupplement1/Figure 5–figure supplement 1-source data 2. Uncropped and Unlabeled gels for Figure 5.Gel6.pdf]

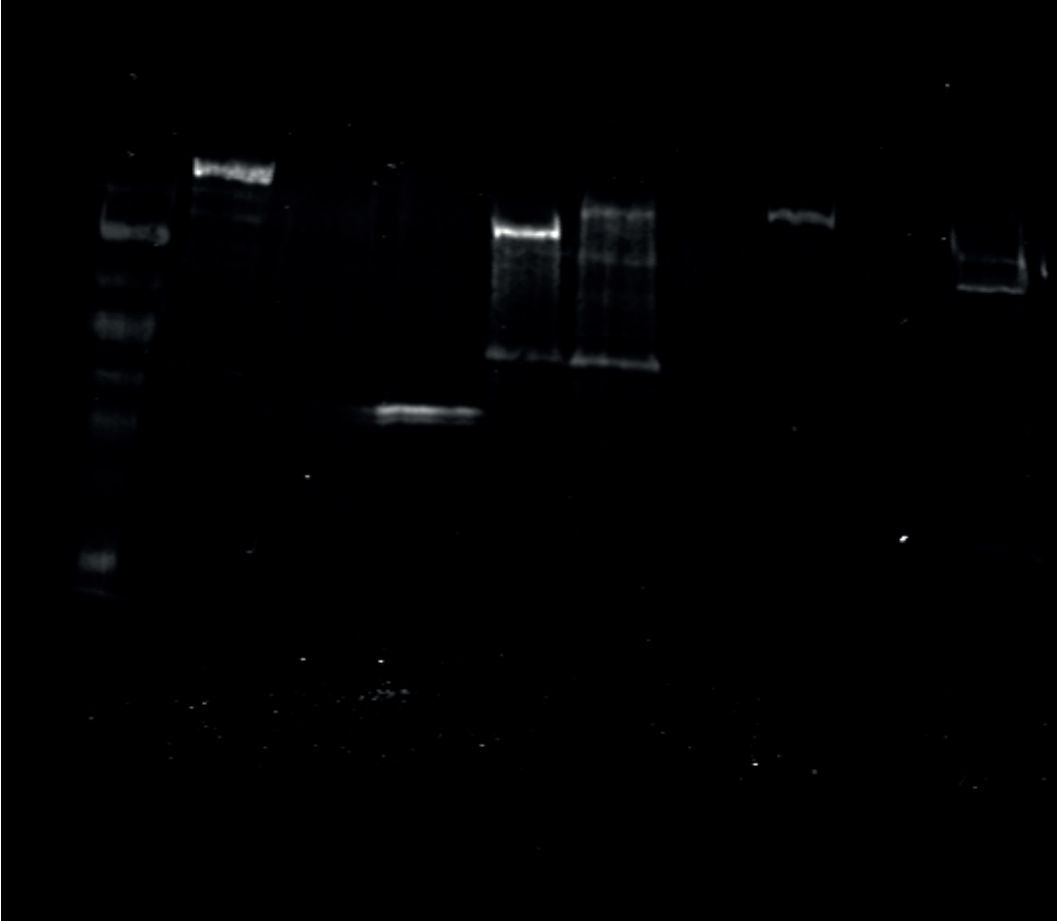

Supplement: fig5-figsupp1-data2 [file Figure 5–figure supplement 1-source data 2. Uncropped and Unlabeled gels for Figure 5.Gel7.pdf › eLife.95028.SourceData2.Raw and unedited_gels_for_Figure5_FigureSupplement1/Figure 5–figure supplement 1-source data 2. Uncropped and Unlabeled gels for Figure 5.Gel7.pdf]

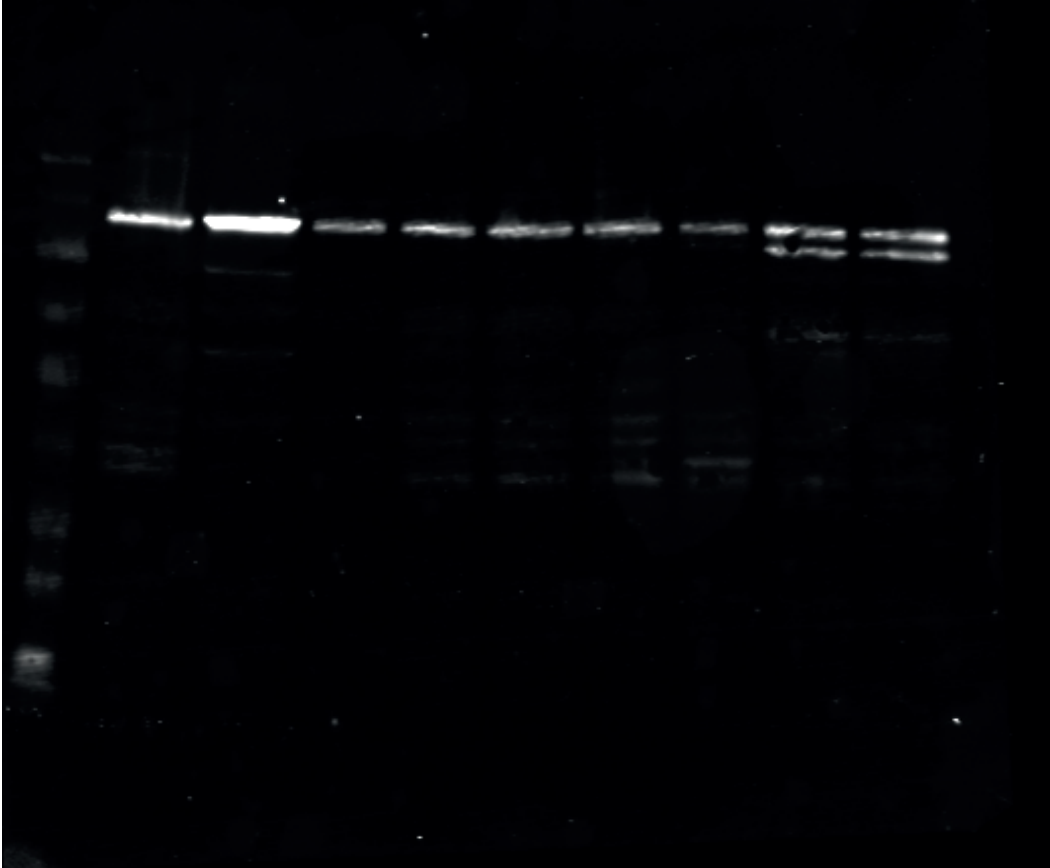

Supplement: fig5-figsupp1-data2 [file Figure 5–figure supplement 1-source data 2. Uncropped and Unlabeled gels for Figure 5.Gel8.pdf › eLife.95028.SourceData2.Raw and unedited_gels_for_Figure5_FigureSupplement1/Figure 5–figure supplement 1-source data 2. Uncropped and Unlabeled gels for Figure 5.Gel8.pdf]
